# Supplementary material for: Recurrent intra-tumour heterogeneity is a hallmark of metastatic prostate cancer
Source: Research Square preprint supplement (doi:10.21203/rs.3.rs-7015699/v1), 2025-11-25
Supplement: Supplementary file 1 [file 7c1fc829a876410edd118adc.xlsx]

## Sheet: S1
Supplementary Table S1: Pathology and histology review records
The best quality samples based on low fat and necrosis percentage, with high tumour purity and organ diversity were selected for the study. The "Labels" column lists the naming. used in the main text for the samples included in the study.
Donor	Tissue	Selected	Labels	%Necrosis(within tumour)	%Tumour(whole slide)	%Fat (whole slide)	Additional comments	PSMA % 0	PSMA %1+	PSMA %2+	PSMA %3+	Total %	PSMA Localization	AR_percentage	AR_intensity	AR_comments	INSM1 %	INSM1 intensity	SYP%	CNGA
CA27	paraaortic lymph nodes (left upper)	Y	LN 1	0	65	10	favour PD adenoca, although some areas raise possibility of NEC (nuclei & architecture favour NEC, but retained cytoplasm)	0	20	50	30	100	cytoplasmic & membranous	10	1+		<1	1	1	1
	paraaortic lymph nodes (left lower)			<5	50	25	favour PD adenoca, although some areas raise possibility of NEC	5	10	70	15	100	cytoplasmic & membranous	0	0
	paraaortic lymph nodes (right)			0	60	60	favour PD adenoca, although some areas raise possibility of NEC	0	20	60	20	100	cytoplasmic & membranous	5	1+		0	0
	paraaortic lymph nodes (right)			0	65	50	favour PD adenoca, although some areas raise possibility of NEC	0	20	40	40	100	cytoplasmic & membranous	5	1+
	paraaortic lymph nodes (right)			0	60	30	favour PD adenoca, although some areas raise possibility of NEC	0	20	20	60	100	cytoplasmic & membranous	0	0
	adrenal right			0	15	20	favour PD adenoca, although some areas raise possibility of NEC	0	10	90	0	100	cytoplasmic & membranous	20	1+		5	2
	left ureter			0	60	5	favour PD adenoca, although some areas raise possibility of NEC	0	50	40	10	100	cytoplasmic & membranous	5	1+		<1	2
	prostate - apex right side			0	35	5	some areas favour PD adenoca, other areas raise possibility of NEC (but not definite small cell ca)	5	15	50	30	100	cytoplasmic	<5%	3+		<1	1
	prostate - apex left side	Y	prostate 9	0	40		some areas favour PD adenoca, other areas raise possibility of NEC (but not definite small cell ca)	0	20	20	60	100	cytoplasmic & membranous	5	1+	internal control very weak	2	3	0	1
	prostate - meat right side			0	40	0	some areas favour PD adenoca, other areas raise possibility of NEC (but not definite small cell ca)	5	25	45	25	100	cytoplasmic	0	0
	prostate - meat left side			0	20	35	favour PD adenoca, although some areas raise possibility of NEC	5	25	40	30	100	cytoplasmic	<5%	3+		0	0
	base of bladder			0	65	5	some areas favour PD adenoca, other areas raise possibility of NEC (but not definite small cell ca)	5	30	25	40	100	cytoplasmic	0	0		5	3
	dural base skull	Y	dura 13	<5	75	0	favour PD adenoca, although some areas raise possibility of NEC	10	30	30	30	100	cytoplasmic & membranous	10	1+		5	3	0	2
	dural inner skull	Y	dura 14	0	80	0	favour PD adenoca, although some areas raise possibility of NEC	0	0	50	50	100	cytoplasmic & membranous	10	1+		2	2	0	0
	left inguinal lymph node			0	50	35	favour PD adenoca, although some areas raise possibility of NEC	0	20	50	30	100	cytoplasmic & membranous	5	1+		1	2
	right inguinal lymph node			0	65	30	favour PD adenoca, although some areas raise possibility of NEC	0	30	30	40	100	cytoplasmic & membranous	35	1+		0	0
CA34	Prostate tissue - neck of bladder			<5	60	10		15	10	15	60	100	cytoplasmic & membranous	60	2+		0	0
	Right infra-renal paraaortic node	Y	LN 2	<5	80	<5		40	40	20	0	100	cytoplasmic	75	3+		0	0	10	<1
	Porta-hepatic lymph node			<5	5	<5		20	40	40	0	100	cytoplasmic & membranous	70	2+		<1	2
	Liver: right lobe A	Y	liver 8	<5	60	0		50	10	40	0	100	cytoplasmic & membranous	50	3+				1	1
	Liver: right lobe B			5	60	0	favour PD adenoca, although some features raise the possibility of NEC (not small cell ca)	35	30	30	5	100	cytoplasmic & membranous	70	3+		<1	2
	Liver: right lobe C			10	80	0		40	40	20	0	100	cytoplasmic & membranous	30	3+		<1	2
	Liver: left lobe A	Y	liver 11	5	60	0		30	50	15	5	100	cytoplasmic & membranous	30	2+				1	1
	Liver: left lobe B			5	60	0	favour PD adenoca, although some features suggest NEC (nuclei, architecture) but not small cell ca	25	50	20	5	100	cytoplasmic & membranous	35	3+		<1	2
	Liver: left lobe C			10	75	0		30	50	15	5	100	cytoplasmic & membranous	40	3+
CA35	Left para-aortic lymph node track	Y	LN 1	5	80	5	Adenocarcinoma	5	5	40	50	100		90	2+		0	0	2	0
	Bladder base #1	Y	bladder 2	0	85	0	Adenocarcinoma	5	5	60	30	100		90	2+		0	0	1	0
	Bladder base #2			0	85	0	Adenocarcinoma	0	0	20	80	100		90	2+		0	0
	Bladder base #3			0	85	0	Adenocarcinoma	0	0	40	60	100		90	2+		0	0
	T4/T5 vertebrae			0	20	20	Adenocarcinoma	N/A	N/A	N/A	N/A	0		90	2+		0	0
CA43	right orbital deposit			N/A	N/A	N/A	no prostate ca	?	?	?	?	0	NA, no PSMA reactivity, but no Prostatic adenoca (? Meningioma)	N/A	N/A	no prostate ca	na	na
	Thoracic vertebrae			<5	50	5		0	10	60	30	100	cytoplasmic & membranous	50	2+		0	0
	lymph node - portal	Y	LN 4	<5	70	<1		98	0	2	0	100	cytoplasmic, tiny focus of PSMA-reactive tumour, separate to main tissue mass	5	1+		0	0	0	<1
	Liver: right lobe nodule 1			0	80	0		0	0	60	40	100	cytoplasmic	30	2+		0	0
	Liver: right lobe nodule 2	Y	liver 7	0	80	0		10	60	30	0	100	cytoplasmic, ? Fixation artefact	30	1+		0	0	0	0
	Liver: left lobe nodule 3	Y	liver 12	0	80	0	PD adenoca	0	0	20	80	100	cytoplasmic & membranous	65	2+				0	0
CA46	Para aortic mass			0	90	5		100	0	0	0	100		0	0		80	3
	Hilar lymph node - left	Y	LN 5	5	80	0		100	0	0	0	100		0	0		80	3	95	<1
	Lung: left lower lobe nodule	Y	LN 7	5	80	0		100	0	0	0	100		0	0		70	3	95	<1
	Right pulmonary nodule			0	60	15		N/A	N/A	N/A	N/A	0		0	0		60	3
	Liver: left lobe nodule (2)			25	90	0		100	0	0	0	100		0	0		60	3
	Liver: right lobe nodule (2)	Y	liver 12	15	75	0		N/A	N/A	N/A	N/A	0		0	0		50	3	95	<1
	Left kidney			0	80	10		100	0	0	0	100		0	0		75	3
	Left para-aortic node	Y	LN 15	5	80	<5											80	3	95	<1
	Prostate - posterior	Y	prostate 17	<5	80	5		100	0	0	0	100		0	0		30	1	95	0
	Pelvic lymph node (1)	Y	LN 19	0	70	<5											50	2	95	<1
CA58	Vertebrae - Lumbar							20	10	50	20	100		5	1+		0	0
	Basal Ganglia			0	0	0	no tumour	N/A	N/A	N/A	N/A	0		N/A	N/A		na	na
	Vertebrae - T7 (#2)							5	5	60	30	100		0	0		0	0
	Right colon							N/A	N/A	N/A	N/A	0		N/A	N/A		na	na
	Hilar Lymph Node			0	60	15	Mostly poorly differentiated adenocarcinoma, minor undifferentiated component (?NE), but need IHC to be confident	10	30	50	10	100		50	1+		<1	1
	Liver - Left Lobe Site #1			10	75	0	Undifferentiated carcinoma, no definite adenocarcinoma differentiation, possible NE, but not typical small cell carcinoma morphology	100	0	0	0	100		0	0		10	2
	Liver - Left Lobe Site #2	Y	liver 29	5	90	0	Undifferentiated carcinoma, no definite adenocarcinoma differentiation, possible NE, but not typical small cell carcinoma morphology	100	0	0	0	100	N/A	0	0		0.05	1	1	2
	Liver - Centre Site #1			50	70	0	Mostly undifferentiated carcinoma, ? NE	1
	Liver - Centre Site #2			5	50	0	Mostly undifferentiated carcinoma, ? NE	1
	Liver - Right Lobe Site #1	Y	liver 38	10	80	0	Mostly undifferentiated carcinoma, ? NE	100	0	0	0	100		0	0		10	2	70	10
	Liver - Right Lobe Site #2			30	80	0	Mostly undifferentiated carcinoma, ? NE	1						60	2+
	Left Lung			0	50	0	Favour poorly differentiated adenocarcinoma	0.5	0.5
	Left Lung - Hilar Lymph Node	Y	LN 50	5	60	0	Favour poorly differentiated adenocarcinoma	5	30	40	25	100		50	2+		<1	1	10	60
CA76	right adrenal tumour			15	50	10	Favour poorly differentiated adenocarcinoma	80	15	5	0	100	cytoplasmic & membranous	10	1+		0	0
	Right 7th rib inner thoracic cavity			20	50	0	Favour poorly differentiated adenocarcinoma	100	0	0	0	100	cytoplasmic	0	0		0	0
	Right psoas muscle tumour			0	5	15	Favour poorly differentiated adenocarcinoma	90	5	5	0	100	cytoplasmic	20	1+		0	0
	left 6th rib soft tumour tissue	Y	bone 17	15	50	5	Favour poorly differentiated adenocarcinoma	90	5	5	0	100	cytoplasmic & luminal	5	1+	bone, ? Decalcified			NA	NA
	vertebra L2 soft tumour tissue			5	40	15	Favour poorly differentiated adenocarcinoma	90	5	5	0	100	cytoplasmic	0	0		0	0
	slice through side of vertebra L2, L3, L4			5	25	25	Favour poorly differentiated adenocarcinoma	90	5	5	0	100	cytoplasmic	0	0		0	0
	Anterior surface of L5 vertebra soft tumour	Y	bone 25	10	60	20	Favour poorly differentiated adenocarcinoma	90	5	5	0	100	cytoplasmic	0	0				NA	NA
	L hilar LN tumour			2	35	20	Favour poorly differentiated adenocarcinoma	60	20	20	0	100	cytoplasmic	0	0		0	0
	sub carinal LN tumour			2	5	10	Favour poorly differentiated adenocarcinoma	30	60	10	0	100	cytoplasmic	40	2+
	Left lobe liver tumour			50	85	0	Favour poorly differentiated adenocarcinoma	95	5	0	0	100	cytoplasmic	10	1+		0	0
	right lobe liver, continuous tumour nodules (merged)			20	70	0	Favour poorly differentiated adenocarcinoma	50	30	20	0	100	cytoplasmic & luminal	5	1+	very weak	0	0
	Right lobe liver, discrete tumour nodule	Y	liver 40	0	60	0	Favour poorly differentiated adenocarcinoma	10	20	70	0	100	cytoplasmic & luminal	5	1+	very weak			0	<1
				0	5	0	Favour poorly differentiated adenocarcinoma										0	0
	Caudate lobe liver tumour nodule			0	25	0	Favour poorly differentiated adenocarcinoma	70	30	0	0	100	cytoplasmic	10	1+		0	0
	right hilar LN tumour			10	20	25	Favour poorly differentiated adenocarcinoma	95	5	0	0	100	cytoplasmic	5	1+		0	0
	Left lung tumour, sub pleural nodule			0	5	0	Favour poorly differentiated adenocarcinoma	90	10	0	0	100	cytoplasmic	20	1+		0	0
	Right lung tumour nodules, sub pleural			10	25	0	Favour poorly differentiated adenocarcinoma	95	5	0	0	100	cytoplasmic	5	1+	very weak
CA83	Prostate, posterior			0	0			N/A	N/A	N/A	N/A	0		N/A	N/A		na	na
	Prostate, anterior			0	0			N/A	N/A	N/A	N/A	0		N/A	N/A		na	na
	right para-aortic LN 1	Y	LN 12	10	0.5			50	30	15	5	100	cytoplasmic (perinuclear dot)	30	2+		0	0	0	0
	right side peri-nephric tissue (?LN)	Y	fat 19	35	0.75			50	20	20	10	100	cytoplasmic (perinuclear dot)	5	2+		0	0	0	0
	left side peri-nephric tissue 2 (?LN)			10	0.2			50	20	20	10	100	cytoplasmic (perinuclear dot)	0	0		0	0
	right mediastinal LN			15	0.5			50	10	20	20	100	cytoplasmic (perinuclear dot)	0	0		0	0
	left mediastinal LN 1			15	0.3			20	60	15	5	100	cytoplasmic (perinuclear dot)	0	0		0	0
	right hilar LN 1			65	0.25			80	5	10	5	100	cytoplasmic (perinuclear dot)	0	0		0	0
	right hilar LN 4	Y	LN 47	40	0.6			60	20	10	10	100	cytoplasmic	<1	1		0	0	0	0
	left lobe liver Tumour 1	Y	liver 49	5	0.6			90	5	5	0	100	cytoplasmic	0	0		0	0	0	0
	left upper lobe lung	Y	lung 55	0	0.5			5	10	50	35	100	cytoplasmic & membranous	90	3+		0	0	1	<1
	right para-tracheal LN			40	0.5			10	35	50	5	100	cytoplasmic (perinuclear dot) & membranous	0	0		0	0
CA90	Brain Right temporal fossa	Y	brain 2	15	85			100	0	0	0	100		0	0		50	3	80	50
	Brain Left fronto-parietal			5	20			100	0	0	0	100		0	0		40	3
	Left anterior abdomen, subcutaneous tumour	Y	abdomen 13	15	80			100	0	0	0	100		0	0		30	3	95	40
	Brain left medial occipital lobe			0	1		tiny piece of tumour at edge, ? Carryover	100	0	0	0	100		N/A	N/A		40	3
	Brain, right temporal lobe			0	5		3 tiny pieces of tumour	100	0	0	0	100		0	0		25	3
	brain, right thalamus			10	65			100	0	0	0	100		0	0		40	3
	liver, left lobe tumour 1			15	60			100	0	0	0	100		0	0		30	2
	Para aortic LN ( right side) 1	Y	LN 39	10	80			100	0	0	0	100		0	0		40	3	95	35
	liver, right lobe tumour 1	Y	liver 43	10	80			100	0	0	0	100		0	0		15	3	95	60
	Vertebra, L 1			0	<5%		tiny foci of crushed cellular material, ? Tumour	N/A	N/A	N/A	N/A	0		N/A	N/A		na	na
	LN, porta hepatus	Y	LN 52	10	80			100	0	0	0	100		0	0		30	3	95	20

## Sheet: S2
Supplementary Table S2: Public prostate cancer signatures
Given the diversity of genes in each signature depending on source, we curated signatures to include genes recurrent in over 50% of the available signatures with similar functions, The signatures finally used are beneath the gene set categories.
References:
Aggarwal, R. R., Quigley, D. A., Huang, J., Zhang, L., Beer, T. M., Rettig, M. B., Reiter, R. E., Gleave, M. E., Thomas, G. V., Foye, A., Playdle, D., Lloyd, P., Chi, K. N., Evans, C. P., Lara, P. N., Feng, F. Y., Alumkal, J. J., & Small, E. J. (2019). Whole-Genome and Transcriptional Analysis of Treatment-Emergent Small-Cell Neuroendocrine Prostate Cancer Demonstrates Intraclass Heterogeneity. M…
Diamant, I., Clarke, D. J. B., Evangelista, J. E., Lingam, N., & Ma’ayan, A. (2025). Harmonizome 3.0: Integrated knowledge about genes and proteins from diverse multi-omics resources. Nucleic Acids Research, 53(D1), D1016–D1028. https://doi.org/10.1093/nar/gkae1080
Dong, B., Miao, J., Wang, Y., Luo, W., Ji, Z., Lai, H., Zhang, M., Cheng, X., Wang, J., Fang, Y., Zhu, H. H., Chua, C. W., Fan, L., Zhu, Y., Pan, J., Wang, J., Xue, W., & Gao, W.-Q. (2020). Single-cell analysis supports a luminal-neuroendocrine transdifferentiation in human prostate cancer. Communications Biology, 3(1), 1–15. https://doi.org/10.1038/s42003-020-01476-1
Fridman, A. L., & Tainsky, M. A. (2008). Critical pathways in cellular senescence and immortalization revealed by gene expression profiling. Oncogene, 27(46), 5975–5987. https://doi.org/10.1038/onc.2008.213
Henry, G. H., Malewska, A., Joseph, D. B., Malladi, V. S., Lee, J., Torrealba, J., Mauck, R. J., Gahan, J. C., Raj, G. V., Roehrborn, C. G., Hon, G. C., MacConmara, M. P., Reese, J. C., Hutchinson, R. C., Vezina, C. M., & Strand, D. W. (2018). A Cellular Anatomy of the Normal Adult Human Prostate and Prostatic Urethra. Cell Reports, 25(12), 3530-3542.e5. https://doi.org/10.1016/j.celrep.2018.11.0…
Labrecque, M. P., Coleman, I. M., Brown, L. G., True, L. D., Kollath, L., Lakely, B., Nguyen, H. M., Yang, Y. C., Costa, R. M. G. da, Kaipainen, A., Coleman, R., Higano, C. S., Yu, E. Y., Cheng, H. H., Mostaghel, E. A., Montgomery, B., Schweizer, M. T., Hsieh, A. C., Lin, D. W., … Morrissey, C. (2019). Molecular profiling stratifies diverse phenotypes of treatment-refractory metastatic castration…
Liberzon, A., Birger, C., Thorvaldsdóttir, H., Ghandi, M., Mesirov, J. P., & Tamayo, P. (2015). The Molecular Signatures Database (MSigDB) hallmark gene set collection. Cell Systems, 1(6), 417–425. https://doi.org/10.1016/j.cels.2015.12.004
Milacic, M., Beavers, D., Conley, P., Gong, C., Gillespie, M., Griss, J., Haw, R., Jassal, B., Matthews, L., May, B., Petryszak, R., Ragueneau, E., Rothfels, K., Sevilla, C., Shamovsky, V., Stephan, R., Tiwari, K., Varusai, T., Weiser, J., … D’Eustachio, P. (2024). The Reactome Pathway Knowledgebase 2024. Nucleic Acids Research, 52(D1), D672–D678. https://doi.org/10.1093/nar/gkad1025
Shukla, S., Cyrta, J., Murphy, D. A., Walczak, E. G., Ran, L., Agrawal, P., Xie, Y., Chen, Y., Wang, S., Zhan, Y., Li, D., Wong, W. P. E., Sboner, A., Beltran, H., Mosquera, J. M., Sher, J., Cao, Z., Wongvipat, J., Koche, R. P., … Chen, Y. (2017). Aberrant activation of a gastrointestinal transcriptional circuit in prostate cancer mediates castration resistance. Cancer Cell, 32(6), 792-806.e7. ht…
Tang, F., Xu, D., Wang, S., Wong, C. K., Martinez-Fundichely, A., Lee, C. J., Cohen, S., Park, J., Hill, C. E., Eng, K., Bareja, R., Han, T., Liu, E. M., Palladino, A., Di, W., Gao, D., Abida, W., Beg, S., Puca, L., … Khurana, E. (2022). Chromatin profiles classify castration-resistant prostate cancers suggesting therapeutic targets. Science (New York, N.Y.), 376(6596), eabe1505. https://doi.org/…
Yuan, H., Yan, M., Zhang, G., Liu, W., Deng, C., Liao, G., Xu, L., Luo, T., Yan, H., Long, Z., Shi, A., Zhao, T., Xiao, Y., & Li, X. (2019). CancerSEA: A cancer single-cell state atlas. Nucleic Acids Research, 47(Database issue), D900–D908. https://doi.org/10.1093/nar/gky939
basal			luminal			AR				NE											cell cycle			GI	squamous	amphicrine	hypoxia		MYC		senescence			stress		EMT		stemness	angiogenesis	DNA damage repair		inflammation	apoptosis	quiescence	differentiation	(Tang et al., 2022)
CAV1,CAV2,DEFB1,DKK1,DST,HBEGF,KRT14,KRT15,KRT17,KRT5,RGCC,S100A2			ACPP,ALDH1A3,CD24,CIB1,CLDN3,DBI,DHRS7,DSC2,ELOVL5,FLJ20021,HMGCS1,IL6ST,KLK2,KLK3,KLK4,LMO7,MSMB,MT1F,MT1G,NEAT1,NKX3-1,PART1,PLA2G2A,PLPP1,PPP3CA,PSCA,RAB27B,RDH11,RPS27L,SEC11C,SLC39A6,SLC44A4,SMIM14,TMC5,TMPRSS2,TPD52,TSC22D1,TSPAN8,UQCRQ			AR,FOXA1,GATA2,KLK3,NKX3-1,SLC45A3,TMPRSS2				ASCL1,SOX2											CCNA2,CCND1,CDK1,DLGAP5,HMGB2,MKI67,TOP2A			A1CF,ACSS2,ADCY10,ADH6,AKR1C3,AKR1C4,ALB,ANG,ANGPTL3,ANXA10,ANXA13,APOH,ASB9,BAIAP2L2,BBC3,BTBD16,C12orf74,C1QTNF9,C5,CASP5,CCDC152,CCDC83,CCL15,CD1D,CLRN3,COX19,CYP3A43,DGAT2,DHRS2,DNAJC5B,EGLN3,ERP27,F2RL1,FAM177B,FAM25A,FGB,FGFR4,FGL1,FXYD7,GAS2,GC,GDPD3,GOLT1A,GPR35,GSTA1,GSTA2,GSTK1,GZMM,HAO1,HAVCR1,HKDC1,HNF1A,HNF4G,HOXC9,HPGD,IL1R2,IL1RN,ITM2A,KCNJ16,KCTD16,KIF12,KLB,LAD1,LGALS4,LRG1,MAGEH…	ALDH1A2,ATP8A2,CEND1,CHL1,CNTN1,CYFIP2,DBH,DEFA5,DIO3,EPHA7,FGFRL1,GRIK3,IL17RD,KCNH8,KIF1A,MSRB3,MUC5AC,NKD1,ODC1,PDGFC,PKD2L1,PRKAR2B,PTPRO,SHH,SHISAL1,STOX2,SYT11,TLR4,WNT11	ARHGAP36,ARX,ATP12A,ATP8A2,BEND4,BMX,BPIFB2,C16orf96,CA4,CABP1,CCDC192,CEACAM20,CELF5,CFC1,CFC1B,CLSTN2-AS1,COL9A2,CYP4F30P,DPYSL4,EPHA5,F5,FAM189A1,FAM87B,FEV,FOLH1,GALNTL6,GHRHR,GPA33,HS6ST2,IHH,INSL5,KCNC2,KCNQ2,KIF12,KL,KLK13,LINC00173,LINC00693,LINC00868,LINC00886,LINC00940,LINC01146,LINC01291,LINC01600,LINC01659,LINC01979,LOC100130370,LOC100287846,LOC100506474,LOC101929719,LOC283177,LOC4007…	ADM,ADORA2B,AJUBA,AK4,AKAP12,ALDOC,ANG,ANGPTL4,ARNT,ATF3,BHLHE40,BNIP3,BNIP3L,CA12,CA9,CAV1,CCNG2,CITED2,CREBBP,CUL2,CXCR4,DDIT4,DUSP1,EFNA1,EGLN1,EGLN2,EGLN3,ELOB,ELOC,ENO2,EP300,EPAS1,EPO,ERO1A,F3,FAM162A,FOS,GYS1,HIF1A,HIF1AN,HIF3A,HIGD1A,HILPDA,HK1,HK2,HMOX1,IGFBP3,IL6,JMJD6,JUN,KDM3A,KLF6,KLF7,KLHL24,LDHA,LIMD1,LOX,MAFF,MIF,MXI1,NDRG1,NFIL3,NR3C1,P4HA1,P4HA2,PAM,PDGFB,PDK1,PFKFB3,PFKFB4,PFKP…		ABCE1,ACP1,AIMP2,AP3S1,APEX1,BUB3,BYSL,C1QBP,CAD,CANX,CBX3,CCNA2,CCT2,CCT3,CCT4,CCT5,CCT7,CDC20,CDC45,CDK2,CDK4,CLNS1A,CNBP,COPS5,COX5A,CSTF2,CTPS1,CUL1,CYC1,DCTPP1,DDX18,DDX21,DEK,DHX15,DUSP2,DUT,EEF1B2,EIF1AX,EIF2S1,EIF2S2,EIF3B,EIF3D,EIF3J,EIF4A1,EIF4E,EIF4G2,EIF4H,EPRS1,ERH,ETF1,EXOSC5,EXOSC7,FAM120A,FARSA,FBL,G3BP1,GLO1,GNL3,GOT2,GRWD1,GSPT1,H2AZ1,HDAC2,HDDC2,HDGF,HK2,HNRNPA1,HNRNPA2B1,HNRNP…		CDKN1A,CDKN2A,CDKN2B,CDKN2D,H2AFB1,H2AFJ,H2AFV,H2AFX,H2AFZ,H2BFS,H3F3A,H3F3B,HIST1H2AB,HIST1H2AC,HIST1H2AD,HIST1H2AE,HIST1H2AJ,HIST1H2BA,HIST1H2BB,HIST1H2BC,HIST1H2BD,HIST1H2BE,HIST1H2BF,HIST1H2BG,HIST1H2BH,HIST1H2BI,HIST1H2BJ,HIST1H2BK,HIST1H2BL,HIST1H2BM,HIST1H2BN,HIST1H2BO,HIST1H3A,HIST1H3B,HIST1H3C,HIST1H3D,HIST1H3E,HIST1H3F,HIST1H3G,HIST1H3H,HIST1H3I,HIST1H3J,HIST1H4A,HIST1H4B,HIST1H4C,HIST1…			ATF1,ATF3,CASP2,CHUK,CRADD,DNAJB1,EGR1,FOS,GADD45B,HES1,IER2,IKBKB,IKBKG,JUN,JUNB,MAP2K3,MAP2K4,MAP2K6,MAP3K1,MAP3K14,MAP4K2,MAPK14,MAPK8,NFKB1,NFKBIA,NR4A1,RELA,RHOB,RIPK1,TANK,TNF,TNFRSF1A,TRADD,TRAF2,UBC,ZFP36		ABI3BP,ACTA2,ADAM12,ANLN,ANPEP,APLP1,AREG,BASP1,BDNF,BGN,BMP1,BRCA1,CADM1,CALD1,CALU,CAMK2N1,CAP2,CAPG,CCN1,CCN2,CD44,CD59,CDH11,CDH2,CDH6,CENPA,COL11A1,COL12A1,COL16A1,COL1A1,COL1A2,COL3A1,COL4A1,COL4A2,COL5A1,COL5A2,COL5A3,COL6A2,COL6A3,COL7A1,COL8A2,COMP,COPA,CRLF1,CTGF,CTHRC1,CTSB,CXCL1,CXCL12,CXCL6,DAB2,DCK,DCN,DDR2,DKK1,DPYSL3,DST,ECM1,ECM2,EDIL3,EFEMP2,EFNA1,ELN,EMP3,ENC1,ENO2,ENOPH1,EPB41…		ABCG2,AFMID,AFP,ALDH1A1,ALDH1A3,ANPEP,APC,AQP1,ASCL1,ASCL2,AXIN2,AZGP1,BAZ2B,BMI1,BOC,C6orf62,CA2,CAMK2N1,CCL5,CCND2,CD200,CD24,CD33,CD38,CD44,CDCA7,CDK6,CEBPA,CFTR,CHD7,CORO1C,CXCL2,DBX1,DBX2,DNER,DNMT3A,DPP4,EBF1,EEF1A1,EGFR,EIF4B,EMX1,EMX2,ENG,EPHB2,ETS2,ETV1,EVI2A,EZH2,FABP7,FAM84A,FBLIM1,FBXO27,FERMT1,FOXA2,FOXA3,FOXG1,GATA1,GATA2,GATA3,GATA4,GFAP,GFI1,GLI1,GPC3,GPM6A,GPSM2,GPX2,H19,H3F3B,HA…	ACVRL1,ADGRA2,ANGPT1,ANGPT2,BMPER,CCBE1,CCND2,CD34,CDC42,CIB1,E2F7,E2F8,EDN1,EFNB2,EGR3,EPHB4,ESM1,FGF18,FGF2,FGFR1,FLT1,FLT4,FN1,FOXC2,GPLD1,GREM1,HEY1,ID1,ITGA5,ITGAV,ITGB1,JAG1,JAG2,JMJD6,KDR,LOXL2,MAPK14,MMP14,NOTCH1,NR4A1,NRARP,NRP1,OTULIN,PARVA,PDGFA,PDGFRB,PGF,PIK3CA,PIK3R1,PTGS2,PTK2,PTK2B,RAMP2,RNF213,ROBO1,RSPO3,SEMA5A,SHC1,SOX18,SPP1,SRF,SRPX2,STC1,TAL1,TDGF1,TEK,TNFAIP6,TYMP,VAV2,VCAN…	ABRAXAS1,ALKBH2,ALKBH3,APEX1,ARID3A,ATM,ATR,AURKA,BABAM1,BABAM2,BAX,BCL2L2,BLM,BRCA1,BRCA2,BRCC3,BRIP1,BTG2,CARM1,CASP2,CCNA2,CCNB1,CCND1,CCNH,CCNO,CDC25C,CDK1,CDK2,CDK5RAP3,CDK7,CDKN1A,CDKN1B,CENPJ,CETN2,CHEK1,CHEK2,CNOT1,CNOT10,CNOT11,CNOT2,CNOT3,CNOT4,CNOT6,CNOT6L,CNOT7,CNOT8,CNOT9,CRADD,DDB1,DDB2,DNAJA1,DTL,E2F1,E2F4,E2F7,ERCC1,ERCC2,ERCC3,ERCC4,ERCC8,EXO1,FANCA,FANCB,FANCC,FANCD2,FANCE,FANCF…		ACOD1,ACSL1,ATP2B1,B4GALT1,BMP2,BTG2,CCL18,CCL2,CCL20,CCL23,CCL3,CCL4,CCL5,CCL7,CCL8,CCR2,CCR7,CCRL2,CD44,CD55,CD6,CD80,CEBPB,CSF1,CSF3,CXCL1,CXCL10,CXCL11,CXCL2,CXCL3,CXCL6,CXCL8,DENND5A,DRAM1,EDN1,EREG,F12,F3,FCER1G,FFAR2,FOSL1,FSCN1,FUT4,G0S2,GCH1,GPC3,HIPK2,ICAM1,ICOSLG,IER3,IL12B,IL18,IL1A,IL1B,IL1R1,IL23A,IL6,IRAK2,ITGB8,JAG1,KDM6B,KIF1B,KLKB1,LIF,LITAF,MAFF,MAP2K3,MARCKS,NAMPT,NFKB1,NFKB2,…	AEN,AIFM1,APAF1,APOPT1,ATF4,ATM,BAK1,BBC3,BCAP31,BCL10,BCL2L11,BID,BMF,BOK,BRCA2,CASP2,CASP4,CASP9,CDIP1,CIDEB,CRADD,DAB2IP,DAPK3,DDIT3,DDIT4,DEDD2,DNM1L,DYRK2,E2F2,EP300,G0S2,GSN,IFI16,INHBA,KRT8,LGALS9,MLLT11,MOAP1,NFATC4,NUPR1,P2RX7,PHLDA3,PMAIP1,POLB,PPP1R13B,PPP2R1B,PPP2R5C,PYCARD,RIPK3,SHISA5,SIVA1,SKIL,SNW1,SORT1,ST20,STK3,STK4,TIMP3,TMEM109,TNFRSF12A,TNFRSF1A,TNFRSF1B,TNFRSF21,TP53BP2,USP…	ALOX5,ANXA5,AREG,CCL19,CCL20,CCL8,CREM,CRHBP,CXCL1,CXCL10,CXCL11,CXCL13,CXCL2,CXCL3,CXCL5,CXCL6,CXCL8,CYTIP,EMP1,EVI2A,FNBP1,FXR1,GBP2,GLIPR1,GUCY1A1,H1F0,HBB,HIST1H2AC,HIST1H2BK,HIST2H2BE,HLX,IL18R1,IL1B,INHBA,JUN,MAFF,MLLT3,MPZL2,NFAT5,NR4A2,NRIP1,OPTN,PCDH9,PMCH,PPFIBP1,PTGS2,PTPRC,RBPMS,RGS1,RHAG,SERPINB2,SPTBN1,SVIL,TCF7L2,TFPI,TGFB1I1,TM4SF1,TNFSF10,TNFSF4,TPBG,TPSB2,TRA2A,TRA2B,TSPAN31,VNN…	ABL1,ACVR1,ADA,AGT,AKT1,ANXA1,ARX,ATG5,ATOH1,ATP11C,ATP2B2,ATP7A,AXL,BATF,BCL11B,BCL2,BCL3,BLOC1S6,BMP10,BMP2,BMP6,BRAF,CASP8,CAV3,CCL19,CCNB1,CD86,CDC42,CDH2,CDK1,CDON,CEBPA,CEBPB,CLIC5,CREB1,CSF1,CSF1R,CSF2,CYP26B1,DCSTAMP,DLL4,DRD1,EDN3,EDNRB,EMX1,EOMES,EP300,EPHA2,ERBB4,ERCC2,FADD,FAM20C,FGF8,FGFR1,FGFR2,FLT3LG,FOXA1,FOXC2,FOXP1,GATA1,GATA4,GATA6,GDF7,GDNF,GDPD5,GNAS,GSX2,HDAC2,HEY2,HHEX,HIF1…	As below
(Dong et al., 2020)	(Henry et al., 2018)	(Henry et al., 2018)	(Dong et al., 2020)	v1(Henry et al., 2018)	v2(Henry et al., 2018)	(Labrecque et al., 2019)	(Dong et al., 2020)	(Aggarwal et al., 2019)	(Aggarwal et al., 2019)	neuro_I (Aggarwal et al., 2019)	neuro_II (Aggarwal et al., 2019)	ned_driver(Dong et al., 2020)	related_metaprogram1(Dong et al., 2020)	related_metaprogram2(Dong et al., 2020)	related_metaprogram4(Dong et al., 2020)	NE(Dong et al., 2020)	(Aggarwal et al., 2019)	(Aggarwal et al., 2019)	v1(Henry et al., 2018)	v2(Henry et al., 2018)	(Dong et al., 2020)	(Yuan et al., 2019)	(Yuan et al., 2019)	(Shukla et al., 2017)	(Labrecque et al., 2019)	(Labrecque et al., 2019)	(Milacic et al., 2024)	(Yuan et al., 2019)	V1 (Liberzon et al., 2015)	V2 (Liberzon et al., 2015)	(Fridman & Tainsky, 2008)	REACTOME_CELLULAR_SENESCENCE(Liberzon et al., 2015)	REACTOME_SENESCENCE_ASSOCIATED_SECRETORY_PHENOTYPE_SASP(Liberzon et al., 2015)	(Diamant et al., 2025)	(Henry et al., 2018)	(Liberzon et al., 2015)	(Yuan et al., 2019)	(Yuan et al., 2019)	(Yuan et al., 2019)	DNA damage(Yuan et al., 2019)	DNA repair(Yuan et al., 2019)	(Yuan et al., 2019)	(Yuan et al., 2019)	(Yuan et al., 2019)	(Yuan et al., 2019)	WNT_marker	stem cell like
KRT5	KRT14	CAV1	NKX3-1	MSMB	KLK2	NKX3-1	AR	AR	ETV1	CHGA	CELF3	ASCL1	CHGA	DLX5	BMP4	ASCL1	CHGB	NOTCH2	CHGA	TAGLN3	MKI67	ANLN	ADK	ACSS2	PTPRO	TFF1	AJUBA	PLIN2	ABCE1	AIMP2	ALDH1A3	ACD	H2AB1	TNF	TNF	ABI3BP	BGN	AFMID	ACVRL1	BRCA1	RAD52	BMP2	APAF1	ALOX5	ABL1	AXIN2	CD44
KRT14	DST	EEF1B2	KRT8	KLK3	ACPP	KLK3	KLK3	NKX3-1	ETV4	SYP	PCSK1	VGF	CHGB	TCF4	IGF1	FOXA2	FOXA2	NOTCH2NLA	GRP	MAOB	TOP2A	ANP32E	BAX	ADCY10	SHH	SLC45A1	ARNT	ADM	ACP1	BYSL	AOPEP	AGO1	H2AC14	TNFRSF1A	TNFRSF1A	ACTA2	CDH11	AFP	JAG1	MRE11	POLR2J	CD6	ATF4	ANXA5	ACVR1	RNF43	TACSTD2
TP63	KRT15	PTRF	KRT18	ACPP	KLK4	CHRNA2	TMPRSS2	KLK3	ETV5	ACTL6B	SOX2	SCGN	PEG10	IGFBP2	SOX2	NKX2-1	SOX2	ASCL1	CALCA	ST18	BIRC5	ATAD2	CCND1	ALB	SHISAL1	SLC38A11	CA9	ADORA2B	AIMP2	CBX3	CCN2	AGO3	H2AC18	RELA	RELA	ADAM12	CDH2	ANPEP	ANGPT1	FOXN3	LIG3	CEBPB	ATM	AREG	ADA	TCF7L2	ATXN1
ITGA6	TAGLN	KRT5	CD24	PLA2G2A	KLK3	SLC45A3	FOXA1	TMPRSS2		SNAP25	POU3F2	PAPPA2	DCX	PGF	FGF3	MYCN	SCG2		SCG2	STMN2	HMGB2	AURKA	BMPR1A	ADH6	MUC5AC	PPFIA2	CITED2	AK4	AP3S1	CDK4	CCND1	AGO4	H2AC19	IKBKB	IKBKB	ANPEP	COL1A2	APC	ANGPT2	HIPK2	REV3L	CCR7	BAK1	CREM	AGT	CTNNB1
KRT17	CYR61	ENO1	PSCA	KLK2	PLA2G2A	NAP1L2	GATA2	FOXA1		INSM1	LMO3		ASCL1	EZH2	TP53I3	POU3F2	NKX2-1		TPH1	SCG3	CDK1	BRIP1	BUB1B	AKR1C3	DEFA5	KCNQ2	CREBBP	ALDOC	APEX1	DCTPP1	CD44	ANAPC1	H2AC20	CASP2	CASP2	APLP1	COL3A1	AQP1	CD34	SP100	BRCA1	CSF1	BID	CRHBP	AKT1
KRT15	KRT5	PDCD5	LMO7	TFF1	TSPAN8	S100A14	KLK2	GATA2		ASCL1	NKX2-1		TCF3		FGF19	INSM1	REST		ASCL1	ELAVL4		CASP8AP2	CCNA2	AKR1C4	DBH	DPYSL4	CUL2	ANG	BUB3	DDX18	CDKN1A	ANAPC10	H2AC4	CHUK	CHUK	AREG	COL5A2	ASCL1	CDC42	PSME4	ERCC1	F3	BOK	EMP1	ANXA1
DKK1	RGCC	RAN	CLDN3	AZGP1	SOCS2		FKBP5	HOXB13		CHRNB2			HES6			SIAH2	SPDEF		SCG5	PCSK2		CBX5	CCNB1	ANG	FGFRL1	CFC1	EGLN1	ATF3	C1QBP	DUSP2	CDKN1C	ANAPC11	H2AC6	MAPK14	MAPK14	BASP1	CTGF	ASCL2	MAPK14	RPS6KA6	MNAT1	F12	BRCA2	EVI2A	ATOH1
CAV1	TIMP3	CAV2	AMACR	MT1G	GP2		SLC45A3			SRRM4			SOX4			NCAM1			PHGR1	SYT13		CCNA2	CD40	ANGPTL3	CEND1	LINC01291	EGLN2	BNIP3	CAD	EXOSC5	CDKN2A	ANAPC15	H2AC7	JUN	JUN	BDNF	DDR2	AXIN2	TYMP	TP63	MRE11	FCER1G	CASP2	GBP2	ATP2B2
CAV2	CAV1	NPM1	ERG	TSPAN8	MSMB											CHGA			MIAT	FGF14		CCNB2	CDK1	ASB9	CNTN1	CELF5	EGLN3	BNIP3L	CANX	FARSA	CDKN2B	ANAPC16	H2AC8	MAPK8	MAPK8	BGN	ECM1	AZGP1	EDN1	GTSE1	RFC1	B4GALT1	CASP4	CXCL1	ATP7A
CCN1	MYC	NCL	ALDH1A3	CLDN3	LCP1											CHGB			MAOB	ZACN		CCND1	CDC20	ANXA10	PKD2L1	WIF1	ELOB	CA9	CBX3	GNL3	CDKN2D	ANAPC2	H2AJ	MAP2K6	MAP2K6	BMP1	FAP	BAZ2B	EFNB2	PPP2R5C	TDP1	FFAR2	CASP9	CXCL2	AXL
	KRT17	KRT15		NEAT1	TMC5											SYP			ZACN	FOXA2		CCNE1	CYBA	ANXA13	MSRB3	STEAP4	ELOC	CA12	CCNA2	GRWD1	CITED2	ANAPC4	H2AX	MAP2K4	MAP2K4	CADM1	FBLN5	BMI1	EGR3	TP73	RRM2B	CXCL1	DAPK3	CXCL3	BCL2
	PHLDA1	PA2G4		SEC11C	DHRS7											ENO2			FGF14	GRP		CCNE2	HMGB2	A1CF	SYT11	NKAIN1	EP300	CAV1	CCT2	HK2	CLTB	ANAPC5	H2AZ1	IKBKG	IKBKG	CALD1	FBN1	BOC	EPHB4	CNOT4	ERCC8	CXCL2	DDIT3	GUCY1A1	BCL3
	S100A2	LAYN		CPE	IL6ST											SOX2			ST18	CHGA		CDC25C	IGFBP2	APOH	ALDH1A2	FOLH1	EPAS1	CCNG2	CCT3	HSPD1	COL1A2	ANAPC7	H2AZ2	TRADD	TRADD	CALU	FOXC2	C6orf62	PTK2B	DNAJA1	RFC2	CXCL3	E2F2	H1F0	PRDM1
	MYL9	SRSF3		RDH11	ELL2											EZH2			MS4A8	SCG2		CDC45	MKI67	BAIAP2L2	KIF1A	IHH	EPO	KLF6	CCT4	HSPE1	CREG1	ASF1A	H2BC1	RIPK1	RIPK1	CAP2	FSTL1	CA2	FGF2	BAX	POLD1	ICAM1	EP300	HBB	BMP2
	PALLD	PRMT1		AGR2	RDH11														STMN2	MIAT		CDC6	PRKD1	BBC3	IL17RD	CYP4F30P	HIF1A	DUSP1	CCT5	IMP4	CRYAB	ATM	H2BC10	CRADD	CRADD	CAPG	GSC	CAMK2N1	FGFR1	UIMC1	NTHL1	IL1A	GSN	HLX	BMP6
	ZFP36L2	SRM		TMPRSS2	MT1F														DDC	TPH1		CDCA2	TEK	BTBD16	GRIK3	RAI2	HIF1AN	EFNA1	CCT7	IPO4	CXCL14	BMI1	H2BC11	MAP3K14	MAP3K14	CD44	HAS2	CCL5	VEGFD	AURKA	TP53BP1	IL1B	IFI16	IL1B	BRAF
	HSPA1A	RANBP1		ZG16B	SEMA4B														SCG3	CALCA		CDCA3	TK1	C1QTNF9	ODC1	NEFH	HIF3A	ENO2	CDC20	LAS1L	CYP1B1	CABIN1	H2BC12	NFKB1	NFKB1	CD59	IGFBP4	CCND2	FOXC2	CNOT3	POLB	IL6	INHBA	CXCL8	CASP8
	SERPINF1	CLDN1		NPDC1	PPP3CA														ELAVL4	ASCL1		CDCA8	TOP2A	CASP5	STOX2	ZC4H2	HIGD1A	F3	CDC45	MAP3K6	EIF2S2	CBX2	H2BC13	MAP4K2	MAP4K2	CDH11	MMP1	CD200	FLT1	PCBP4	XRCC1	CXCL8	KRT8	INHBA	CAV3
	MEG3	TUBB4B		DHRS7	DSC2														SLC35D3	PTPRN		CENPA	DLGAP5	CCL15	CHL1	ATP12A	LIMD1	FOS	CDK2	MCM4	ESM1	CBX4	H2BC14	ATF1	ATF1	CDH2	MMP2	CD24	FLT4	TFAP4	XAB2	IL12B	LGALS9	CXCL10	RUNX2
	CLU	SNRPD1		SLC12A2	SEC11C														MIR7-3HG	RP11-317P15.4		CENPE	MELK	CD1D	NKD1	PLPPR1	PSMA1	NR3C1	CDK4	MCM5	F3	CBX6	H2BC15	MAP3K1	MAP3K1	CDH6	MYL9	CD33	FN1	E2F1	POLD3	TNFRSF9	NFATC4	JUN	RUNX1
	FHL2	S100A2		CD24	PART1														HTR3C	GRIN3A		CHAF1B	GINS1	CLRN3	EPHA7	OR51E2	PSMA2	GYS1	CLNS1A	MPHOSPH10	FILIP1L	CBX8	H2BC17	NFKBIA	NFKBIA	COL11A1	NR2F1	CD38	GPLD1	RGCC	XRCC5	IL18	P2RX7	TM4SF1	CCNB1
	CAV2	ATP1B3		KLK4	RDH10														SYT4	NPPA		CKAP2L	KIF14	CCDC152	WNT11	BMX	PSMA3	HIF1A	CNBP	MRTO4	FN1	CCNA1	H2BC21	TRAF2	TRAF2	COL12A1	PCOLCE	CD44	NR4A1	RBL2	RIF1	CXCL10	PMAIP1	MLLT3	CD86
	STK17A	KRT17		SMIM14	SMIM14														TAAR1	CDK5R2		CKAP5	RACGAP1	CCDC83	PRKAR2B	TUBB4A	PSMA4	HK1	COPS5	MYBBP1A	GSN	CCNA2	H2BC3	TANK	TANK	COL16A1	POSTN	CDCA7	ID1	NBN	PALB2	IRAK2	POLB	NR4A2	CDK1
	HBEGF	KRT7		ADIRF	NAMPT														INSM1	AC053503.4		CKS1B	ASPM	C5	DIO3	WNK4	PSMA5	HK2	COX5A	MYC	GUK1	CCNE1	H2BC4	MAP2K3	MAP2K3	COL1A1	PRRX1	CDK6	ITGA5	GML	SIRT1	KLKB1	PPP2R1B	SERPINB2	CDC42
	EDN1	CCDC85B		TMC5	IL1R1														CRMP1	RP11-25K19.1		CKS2	CD24	COX19	TLR4	TUSC8	PSMA6	HMOX1	CSTF2	NDUFAF4	HBS1L	CCNE2	H2BC5			COL1A2	PTX3	CEBPA	ITGAV	BABAM1	POLR2E	NFKB1	PPP2R5C	PCDH9	CDH2
	F3	KRT23		PPP3CA	SLC44A4														PPFIA2	RBFOX1		CLSPN	CX3CL1	CYP3A43	KCNH8	KL	PSMA7	IGFBP3	CTPS1	NIP7	HPS5	CDC16	H2BC6			COL3A1	RGS4	CFTR	ITGB1	CASP2	POLR2F	NFKB2	SORT1	PMCH	CEBPA
	HSPA1B	KRT14		TPD52	MUC3A														RGS7	RIIAD1		DHFR	IGF1	DHRS2	ATP8A2	LRRC31	PSMA8	IL6	CUL1	NOC4L	HSPA2	CDC23	H2BC7			COL4A1	SNAI1	CHD7	KDR	CDK5RAP3	POLE2	OLR1	SKIL	PTGS2	CEBPB
	DEFB1	HBEGF		PART1	TSPAN15														SLC18A1	LINGO2		DLGAP5	CD74	DGAT2	PDGFC	GALNTL6	PSMB1	JUN	CYC1	NOLC1	HTATIP2	CDC26	H2BC8			COL4A2	SPOCK1	CORO1C	LOXL2	CCND1	APEX1	OSM	STK3	PTPRC	CREB1
	DKK1	DST		DSC2	SNRPN														NDST4	PIH1D2		DSCC1	TP63	DNAJC5B	CYFIP2	LOC100287846	PSMB10	LDHA	DDX18	NOP16	IFI16	CDC27	H2BC9			COL5A1	TAGLN	CXCL2	MMP14	FOXM1	POLI	SERPINE1	STK4	RGS1	MAPK14
	CRYAB	RGCC		CIB1	IDH2														PCSK2	RIMBP2		DTL	FGFR1	EGLN3		CEACAM20	PSMB11	LOX	DDX21	NOP2	IFNG	CDK2	H2BS1			COL5A2	TUBA1A	DBX1	NOTCH1	CDKN1B	POLA1	MAP2K3	TIMP3	RHAG	CSF1
		DEFB1		SLC44A4	NEAT1														C11orf16	MS4A8		ECT2	DCT	ERP27		PABPC1L2B-AS1	PSMB2	MIF	DEK	NOP56	IGFBP1	CDK4	H2BU1			COL5A3	TWIST1	DBX2	PDGFA	CNOT2	POLR2C	PTGS2	TNFRSF1A	TSPAN31	CSF1R
				RASEF	MALAT1														CELF3	KCNJ2		EXO1	PTPRC	F2RL1		NXPH1	PSMB3	MXI1	DHX15	NPM1	IGFBP2	CDK6	H3-3A			COL6A2	VIM	DNMT3A	PDGFRB	ING4	MPG	PTX3	TNFRSF1B	CCL8	CSF2
				INSIG1	RAB27B														KCNJ6	SCG5		FEN1	LHX5	FAM177B		CABP1	PSMB4	NFIL3	DUT	PA2G4	IGFBP3	CDKN1A	H3-3B			COL6A3	WNT5A	DPP4	PGF	CNOT6	NBN	REL	TP53BP2	CCL19	DRD1
				SLC39A6	CIB1														NELL2	SNAP25		GAS2L3	ESR1	FAM25A		CCDC192	PSMB5	P4HA1	EEF1B2	PES1	IGFBP4	CDKN1B	H3C1			COL7A1	ACTA2	EBF1	PIK3CA	TFDP2	ERCC2	RELA	DYRK2	CCL20	EDN3
				UQCRQ	STAT3														PTPRN	NRXN1		GINS2	ABL1	FGB		GHRHR	PSMB6	SERPINE1	EIF1AX	PHB	IGFBP5	CDKN2A	H3C10			COL8A2	BRCA1	EEF1A1	PTGS2	NEK11	POLR2I	RELB	CRADD	CXCL6	EDNRB
				STEAP2	RND1														TMEM176A	MAP1A		GTSE1	XBP1	FGL1		TGM3	PSMB7	PAM	EIF2S1	PLK1	IGFBP6	CDKN2B	H3C11			COMP	SERPINH1	EGFR	PTK2	PSMD14	LIG1	S100A8	BCL10	CXCL11	EPHA2
				SERF2	TPD52														KLK12	SLC38A11		HELLS	PDGFB	FGFR4		PEBP4	PSMB8	PDGFB	EIF2S2	PLK4	IGFBP7	CDKN2C	H3C12			COPA	CENPA	EIF4B	ROBO1	ARID3A	RPA3	CCL2	AIFM1	CXCL5	EMX1
				RNF144B	VMP1														LINGO2	EFR3B		HJURP	HIF1A	FXYD7		KIF12	PSMB9	PDK1	EIF3B	PPAN	IGSF3	CDKN2D	H3C13			CRLF1	COL1A1	EMX1	SHC1	MAD2L2	POLD2	CCL3	BCL2L11	TRA2B	EP300
				ABHD2	NGFRAP1														NPPA	LINC00261		HMMR	CD40LG	GPR35		CLSTN2-AS1	PSMC1	PFKFB3	EIF3D	PPRC1	ING1	CEBPB	H3C14			CCN2	COL4A1	EMX2	SRF	GADD45A	RAD51C	CCL4	DNM1L	SPTBN1	ERBB4
				LINC00844	SLC39A6														LINC00299	KLK12		KIF11	FGF9	LGALS4		LINC00868	PSMC2	PFKFB4	EIF3J	PRMT3	IRF5	CXCL8	H3C15			CTHRC1	COL6A2	ENG	TAL1	SYF2	GTF2H1	CCL5	BCAP31	SVIL	ERCC2
				GOLM1	TMPRSS2														RP11-1C8.7	DDC		KIF23	FZD3	GC		ZSCAN1	PSMC3	PFKP	EIF4A1	PUS1	IRF7	E2F1	H3C2			CXCL1	VCAN	EPHB2	TDGF1	RPA2	RAD51AP1	CCL7	SIVA1	TCF7L2	FGF8
				RAB27B	MT1G														KCNB2	B3GALT2		KIF2C	RIPK2	GSTA1		LINC00693	PSMC4	PGF	EIF4E	RABEPK	ISG15	E2F2	H3C3			CXCL12	CTSB	ETS2	TEK	PLAGL1	GTF2H3	CCL8	MLLT11	TFPI	FGFR1
				BACE2	SARAF														PKD2L1	LRRN3		LBR	NUMBL	GSTA2		CFC1B	PSMC5	PGK1	EIF4G2	RCL1	MAP1LC3B	E2F3	H3C4			CXCL6	DAB2	ETV1	VAV2	RBBP6	RFC5	CCL18	RIPK3	TGFB1I1	FGFR2
				MT1F	GLRX														LINC01497	GALR2		MCM4	EBI3	GSTK1		SERPINB11	PSMC6	PGM1	EIF4H	RRP12	MAP2K3	EED	H3C6			CCN1	DCK	EVI2A	VEGFA	CDK2	FANCE	CCL20	SNW1	TPBG	FOXC2
				PSCA	FNIP2														NOL4	ANK2		MCM5	WNT2	GDPD3		SSTR5	PSMD1	PLAUR	EPRS1	RRP9	MDM2	EHMT1	H3C7			DAB2	FBLN2	EZH2	VEGFC	CDKN1A	RAD50	CCL23	PPP1R13B	TNFSF4	FLT3LG
				ELOVL5	SH3BP4														NR0B2	FBXL16		MCM6	IL2	GOLT1A		LINC01146	PSMD10	PLOD2	ERH	SLC19A1	MMP1	EHMT2	H3C8			DCN	FN1	FABP7	FGF18	SOX4	OGG1	CXCL6	PHLDA3	FXR1	MTOR
				FLJ20021	CLDN3														NAT8L	PSD		MKI67	IL23A	GZMM		COL9A2	PSMD11	PPP1R3C	ETF1	SLC29A2	NDN	EP400	H4-16			DKK1	GAS1	FAM84A	NRP1	CNOT1	FANCL	CXCL11	NUPR1	NRIP1	GATA1
				B2M	ELOVL5														SLC8A1	RP11-131L12.3		NASP	VEGFA	GAS2		NEFM	PSMD12	RNASE4	EXOSC7	SORD	NME2	ERF	H4C1			DPYSL3	HIF1A	FBLIM1	SEMA5A	PRMT1	MAD2L2	THBS1	BBC3	HIST1H2AC	GATA4
				PMEPA1	DBI														TMEM176B	TOX		NCAPD2	SEMA5A	HAVCR1		LOC283177	PSMD13	SAT1	FAM120A	SRM	NRG1	ETS1	H4C11			DST	HMMR	FBXO27	RAMP2	BCL2L2	RPA2	TLR2	CIDEB	HIST2H2BE	GATA6
				HMGCS1	ALDH1A3														LCN15	KCNH3		NDC80	IL4	HNF4G		BEND4	PSMD14	SLC2A1	FBL	SUPV3L1	OPTN	ETS2	H4C12			ECM1	TNC	FERMT1	CIB1	PCNA	RAD23B	TNF	TNFRSF21	PPFIBP1	GDNF
				LMO7	MEAF6														INA	RET		NEK2	CD86	HKDC1		RAP1GAP	PSMD2	SLC2A3	G3BP1	TBRG4	PEA15	EZH2	H4C13			ECM2	ITGAV	FOXA2	ESM1	RBM38	POLK	TNFSF4	PYCARD	TNFSF10	GNAS
				SORD	AIM1														ST8SIA5	FAM131B		NUF2	STAT1	HNF1A		ARHGAP36	PSMD3	SPAG4	GLO1	TCOF1	RAB13	FOS	H4C14			EDIL3	LUM	FOXA3	JMJD6	CCNB1	SMUG1	VCAM1	CDIP1	IL18R1	HDAC2
				FXYD3	ST6GAL1														SNAP25	DUBR		NUSAP1	ID2	HOXC9		BPIFB2	PSMD4	STC1	GNL3	TFB2M	RAB31	FZR1	H4C15			EFEMP2	MCM3	FOXG1	HEY1	TAOK3	WRNIP1	WNT5A	G0S2	VNN1	NCKAP1L
				ALDH1A3	PNRC1														SYT13	TGM3		PCNA	DOCK7	HAO1		LINC00886	PSMD5	TGFBI	GOT2	TMEM97	RAB5B	HIRA	H4C2			ELN	MCM7	GATA1	ADGRA2	MDM2	XRCC3	RIPK2	SHISA5	CYTIP	NRG1
				IL6ST	SGMS2														NELL1	LMX1B		POLA1	SLAMF1	HPGD		RFX6	PSMD6	TPI1	GSPT1	UNG	RABGGTA	HMGA1	H4C3			EMP3	MKI67	GATA2	GREM1	CNOT6L	MBD4	SPHK1	TNFRSF12A	OPTN	HHEX
				TSC22D1	HMGCS1														AOC1	AC084219.4		POLD3	TNFSF4	ITM2A		MMP10	PSMD7	VEGFA	H2AZ1	UTP20	RAC1	HMGA2	H4C4			ENO2	MMP14	GATA3	SRPX2	BRCA2	POLN	CCRL2	WWOX	MPZL2	HIF1A
				DBI	ATP1A1														SCGN	TAAR1		PRIM1	WNT1	IL1RN		TGM4	PSMD8	VLDLR	HDAC2	WDR43	RBL2	ID1	H4C5			FAP	NT5E	GATA4	SOX18	PML	RPA1	OSMR	DDIT4	CXCL13	HMGB1
				PLPP1	RNF213														LY6H	CADPS		PSRC1	TNFSF9	IL1R2		LINC00173	PSMD9	CXCR4	HDDC2	WDR74	RGL2	IFNB1	H4C6			FAS	ODC1	GFAP	PARVA	FANCI	PCNA	RASGRP1	USP28	NFAT5	FOXA1
				H2AFJ	UQCRQ														TAGLN3	ERICH3		PTTG1	MED1	KIF12		LINC01979	PSME1	PPFIA4	HDGF		RHOB	IGFBP7	H4C8			FBLN1	PDGFRA	GFI1	RNF213	TP53	MUTYH	TNIP1	MOAP1	GLIPR1	HOXA5
				ELF3	MIDN														SRRM4	CCDC184		RAD21	SMO	KLB		ST6GAL1	PSME2	BHLHE40	HNRNPA1		RRAS	IL1A	H4C9			FBLN2	PLAUR	GLI1	E2F8	PMAIP1	RFC3	KDM6B	AEN	RBPMS	IGF1
				SPINK1	NCOA7														EPHB1	QRFP		RAD51AP1	TLR4	LAD1		CA4	PSME3	KLF7	HNRNPA2B1		S100A11	IL6	H2AFB1			FBLN5	PPIC	GPC3	RSPO3	CARM1	CDK7	TLR7	TMEM109	FNBP1	IL2
				NDRG1	RPS27L														SLC38A11	SYT1		RANGAP1	MYC	LRG1		INSL5	PSME4	STC2	HNRNPA3		SERPINB2	JUN	HIST1H2AJ			FBN1	HTRA1	GPM6A	OTULIN	DTL	CCNH	IL23A	APOPT1	MAFF	IL4R
				RPS27L	TSC22D1														NRXN1	PHGR1		RFC2	LEF1	MAGEH1		MIR137HG	PSMF1	SAP30	HNRNPC		SERPINE1	KAT5	HIST2H2AA3			FBN2	RBL1	GPSM2	E2F7	RPS27A	DDB2	TNIP2	BMF	TRA2A	IL11
				SAT1	PTMS														SYT11	SLITRK6		RFC4	ASCL1	MIA2		PHGR1	RBX1	P4HA2	HNRNPD		SMPD1	KDM6B	HIST2H2AA4			FERMT2	CXCL6	GPX2	CCBE1	CNOT9	REV1	ZC3H12A	DAB2IP	TPSB2	IL12B
				NKX3-1	ERRFI1														HEPACAM2	PROX1		RPA2	FGF7	METTL7B		PTPRT	RPS27A	STBD1	HNRNPR		SMURF2	LMNB1	HIST2H2AC			FGF2	SDC1	H19	BMPER	CCNA2	BRIP1	CCR2	DEDD2	ZBTB10	IL15
				TXNIP	SELM														CDK5R2	CACNA1A		RRM1	OSR1	MUC13		RORB	SEM1	AKAP12	HNRNPU		SOD1	MAP2K3	HIST1H2AB			FLNA	SDCBP	H3F3B	NRARP	PLK2	XPA	ACOD1	ST20	HIST1H2BK	ILK
				MT1E	SQRDL														CEND1	SLC35D3		RRM2	IL18	MYO1A		MEP1A	UBA52	CITED2	HPRT1		SPARC	MAP2K4	HIST1H2AC			FMOD	TIMP1	HACD3	TNFAIP6	TNKS1BP1	TDG	JAG1			INSM1
				FDPS	CLDN4														GRIN3A	PTPN22		SLBP	WNT3A	NTM		LINC01600	UBB	NDRG1	HSP90AB1		STAT1	MAP2K6	HIST1H2AD			FN1	ENC1	HAPLN1	VCAN	RPS3	BRCA2	ATP2B1			IRF4
				MT2A	SOD2														FLJ46066	AMPH		SMC4	WNT7A	NLRP12		HS6ST2	UBC	TXNIP	HSPD1		TES	MAP2K7	HIST1H2AE			FOXC2	TUBB3	HEPN1	SPP1	ATM	TP53	CD80			JAG2
				JUN	MPC2														RBFOX1	RP11-422P24.11		TACC3	DISC1	NR1H4		SALL4	UBE2D1	ZNF292	HSPE1		TFAP2A	MAP3K5	H2AFJ			FSTL1	PLK4	HES1	CCND2	CHEK1	PARP1	CD44			JUN
				GADD45B	FLJ20021														GPR55	CXXC4		TIPIN	BMP10	OR4N4		FAM87B	UBE2D2	JMJD6	IARS1		TGFB1I1	MAP4K4	H2AFX			FSTL3	ORC6	HNRNPH1	PIK3R1	HMGA2	RPS27A	CSF3			JUNB
					PLPP1														RP11-867O8.5	CRMP1		TMPO	SYK	PPARG		LOC100130370	UBE2D3	MAFF	IFRD1		THBS1	MAPK1	H2AFZ			FUCA1	ANLN	HNRNPL	STC1	UBC	POLR2D	CD55			KIT
					BIRC3														CCDC187	TAT-AS1		TOP2A	IL13	PLA2G1B		LOC101929719	VEGFA	FAM162A	ILF2		TNFAIP2	MAPK10	H2AFV			FZD8	CAMK2N1	HOPX	JAG2	CENPJ	FANCD2	EDN1			LAMB2
					SLC26A4														IQSEC3	RP11-1250I15.3		TTK	BCL2	PLA2G4E		ATP8A2	VHL	HILPDA	IMPDH2		TNFAIP3	MAPK11	HIST1H2BA			GADD45A	ENOPH1	ICAM1		XPC	CETN2	EREG			LEP
					ZFP36														AC015849.2	SPAG6		TUBB4B	ID4	PLAC1		ARX	WTIP	ERO1A	KARS1		TP53	MAPK14	HIST1H2BI			GADD45B	CD44	IDH1		CNOT8	POLR2K	ACSL1			LGALS1
					ID1														GPC5-AS1	KCNJ6		TYMS	STAT5B	PLEKHG7		F5		ANGPTL4	KPNA2		TSPYL5	MAPK3	HIST1H2BJ			GAS1	LOXL2	IKZF1		BABAM2	SSRP1	FUT4			LGALS9
					SLC25A37														TDRG1	RP5-1033H22.2		UBR7	CD34	PKHD1		TAC1		DDIT4	KPNB1		VIM	MAPK7	HIST1H2BK			GEM	TGFBR3	IRX3		CDC25C	ATM	GCH1			LHX1
					LMO7														RP11-768G7.2	SORCS1		UHRF1	CTC1	KCTD16		FEV		EGLN1	LDHA			MAPK8	HIST1H2BL			GJA1	WNT16	ITGAM		CNOT11	XRCC4	GPC3			LIF
					WTAP														NKAIN2	HEPACAM2		UNG	TBX1	KCNJ16		GPA33		KLHL24	LSM2			MAPK9	HIST1H2BM			GLIPR1	WNT2	KDR		BTG2	CCNO	IL1R1			LMNA
					EMP1														PEX5L	AC013463.2		USP1	IRS2	POTED		KLK13		TMEM45A	LSM7			MAPKAPK2	HIST1H2BN			GPC1	TGFBR1	KIT		ZNF385A	XPC	ITGB8			LYN
																			RP11-675F6.4	LINC01497		WDR76	TNFRSF4	POTEE		LRRC7		KDM3A	MAD2L1			MAPKAPK3	HIST1H2BO			GPX7	FGF8	KLK10		USP1	FANCC	LIF			SMAD4
																			ANK2	ERBB4		POLA2	HMGB1	POU5F1		LINC00940		ZNF395	MCM2			MAPKAPK5	HIST2H2BE			GREM1	EPB41L5	KRT14		ABRAXAS1	ERCC3	MARCKS			MEF2A
																			FOXA2	PRUNE2		GCLM	ZNF335	PPFIBP2		C16orf96		EGLN3	MCM4			MDM2	HIST1H2BB			HTRA1	OLFM1	LATS2		RNF168	POLR2H	NFKBIA			MEF2C
																			CADPS	UCHL1		HMGB3	NRARP	PRLR		PLA2G2F			MCM5			MDM4	HIST1H2BC			ID2	HEY2	LGR5		SPIDR	RFC4	NINJ1			KITLG
																			FIBCD1	BEX1		DEPDC1B	BMPR2	PROC		RSPO4			MCM6			MINK1	HIST1H2BD			IGFBP2	LEF1	LOH12CR2		E2F7	HMGB2	SERPINB2			MMP14
																			LINC00261	SCGN		PRR11	AGER	PTK2B		LOC100506474			MCM7			MOV10	HIST1H2BE			IGFBP3	ERG	LRIG1		CRADD	WRN	PLAUR			MYF5
																			SYT1	MAL		NUCKS1	MIF	PCBD1		LINC01659			MRPL23			MRE11	HIST1H2BF			IGFBP4	HEY1	LY6D		CDK1	POLL	RGS16			MYF6
																			PCSK1	RAB26		NUP37	CCL5	RPGRIP1		LOC400710			MRPL9			NBN	HIST1H2BG			IL15	TMEM100	LYZ		UBB	ALKBH3	SDC4			MYH9
																			UCHL1	KCNJ2-AS1		UBE2T		RDH5		OR51E1			MRPS18B			NFKB1	HIST1H2BH			IL32	EFNA1	MALAT1		TRIAP1	DDB1	SLC1A2			MYO7A
																			AC010746.3	FKBP6		ORC6		RNASE4		KCNC2			MYC			PHC1	H2BFS			IL6	S100A4	MBOAT1		RAD9A	POLR2G	FSCN1			MYOD1
																			KIAA1644	NLGN4X		CENPM		RNF128		FAM189A1			NAP1L1			PHC2	HIST3H2BB			INHBA		MESP1		KAT5	FEN1	STAT5A			MYOG
																			ASGR2	HOXB8		VRK1		SPINK1		EPHA5			NCBP1			PHC3	H3F3A			ITGA2		MESP2		PLK3	UBE2V2	TNFAIP2			NFATC2
																			RP11-386M24.9	KRT20		CDC25B		SERPINA4					NCBP2			POT1	H3F3B			ITGA5		METTL3		ATR	MGMT	BTG2			NFIB
																			AC009410.1	RP11-727F15.11		FAM83D		SGK2					NDUFAB1			RAD50	HIST1H3A			ITGAV		MLLT10		SFN	POLH	FOSL1			NTRK1
																			RP11-317N12.1	RP11-602N24.3		ASF1B		SIRT4					NHP2			RB1	HIST1H3H			ITGB1		MME		HIC1	EXO1	SNN			NTRK2
																			RP11-482M8.3	LY6H		GRPEL1		SLAIN1					NME1			RBBP4	HIST1H3I			ITGB3		MYB		PIDD1	LIG4	PLPP3			PAFAH1B1
																			NRSN1	FAM131C		RFC5		SLC1A1					NOLC1			RBBP7	HIST1H3J			ITGB5		MYC		UBE2N	ATR	TNFSF9			PAX2
																			ISX	SRPK3		SRSF3		SLC10A5					NOP16			RELA	HIST2H3D			JUN		NANOG		NPM1	POLD4	IER3			PF4
																			RIIAD1	RP4-635E18.6		MND1		SLC10A5					NOP56			RING1	HIST2H3C			LAMA1		NCAM1		CNOT10	ERCC4	SLC28A2			PITX2
																			DAB1	CCDC181		ZWINT		SLC12A3					NPM1			RNF2	HIST2H3A			LAMA2		NEK5		CHEK2	POLE	TRIP10			PLS3
																			MAP1A	NKAIN3		TUBG1		SLC17A4					ODC1			RPS27A	HIST1H3B			LAMA3		NELL2		FOXO4	TOP3A	LITAF			POU4F3
																			DUSP26	ANK1		ENOSF1		SLC26A3					ORC2			RPS6KA1	HIST1H3C			LAMC1		NFE2		MUC1	UBE2N	NAMPT			PPARG
																			RAB39B	CA9		RAN		SLC7A13					PA2G4			RPS6KA2	HIST1H3D			LAMC2		NFIA		BRCC3	FANCB	KIF1B			MAPK3
																			KIF1A	DEPDC4		RFC3		STON2					PABPC1			RPS6KA3	HIST1H3E			LGALS1		NFIB		BLM	RAD51B	DENND5A			MAP2K1
																			FXYD6	RP11-458F8.4		E2F5		SULT1B1					PABPC4			SCMH1	HIST1H3F			LOX		NKX2-5		TFDP1	FANCF	ICOSLG			PROX1
																			SORCS1	NOMO2		AKIRIN2		TIMD4					PCBP1			SP1	HIST1H3G			LOXL1		NODAL		MDM4	RAD51D	PPP1R15A			PSEN1
																			AC053503.4	IRAK1BP1		TROAP		TSPAN33					PCNA			STAT3	HIST4H4			LOXL2		NT5E		CNOT7	FANCA	MAFF			PTGER4
																			KCNJ12	TMEM178A		BORA		TNFRSF1A					PGK1			SUZ12	HIST1H4A			LRP1		OLFM4		E2F4	FANCM	HIPK2			PTN
																			CXCR5	CTD-2095E4.5		PIF1		TOP1MT					PHB			TERF1	HIST1H4J			LRRC15		OPHN1		UBA52	H2AFX	G0S2			PTPN11
																			RP11-310E22.4	TMEM176B		FANCI		TM4SF20					PHB2			TERF2	HIST1H4K			LUM		ORC6		PRKDC	ALKBH2	DRAM1			PTPRZ1
																			ARHGDIG	RIMKLA		LYAR		TMED6					POLD2			TERF2IP	HIST1H4L			MAGEE1		PABPC1			HMGB1	TSLP			RAC1
																			RP11-977B10.2	NELL2		CDCA5		TMPRSS4					POLE3			TFDP1	HIST2H4A			MATN2		PAX6			XRCC6	RNF144B			RAG1
																			B3GALT2	KCNH6		DSN1		TMEM37					PPIA			TFDP2	HIST2H4B			MATN3		POU5F1			XRCC2				RB1
																			RP11-632L2.2	CECR5-AS1		CCNF		TTR					PPM1G			TINF2	HIST1H4B			MCM7		PROM1			BLM				RELB
																			JAKMIP2	ARX		CDC25A		TNFSF11					PRDX3			TNIK	HIST1H4C			MEST		PTK7			GTF2H4				RXRA
																			BSN	GOLGA7B		SAP30		UGT1A1					PRDX4			TNRC6A	HIST1H4D			MFAP5		PTMA			FANCG				CCL19
																			SPX	PTPDC1		CDCA7L		UGT1A10					PRPF31			TNRC6B	HIST1H4E			MGP		PTPRC			UBA52				SHOX2
																			SYN3	RP11-405M12.3		INTS8		UGT1A4					PRPS2			TNRC6C	HIST1H4F			MMP1		PTPRG			PRKDC				SNAI1
																			HCN2	INA		MCM7		UGT1A6					PSMA1			TP53	HIST1H4H			MMP14		PTPRO			GTF2H5				SOD1
																			SCN3A	AC007405.6		CHAF1A		UGT1A7					PSMA2			TXN	HIST1H4I			MMP2		PTPRS							SOX4
																			SYP	CHN1		PBK		UGT1A8					PSMA4			UBA52				MMP3		PTPRZ1							SOX10
																			CACNA1A	SYP		DTYMK		UGT2B15					PSMA6			UBB				MSX1		QPCTL							SOX11
																			OR51E1	ARHGAP24		APEX2		UGT2B4					PSMA7			UBC				MXRA5		RAB42							SP3
																			PCSK1N	TMEM61		KIF5B		VNN1					PSMB2			UBE2C				MYL9		RAMP2-AS1							SPI1
																			ESPL1	RP5-1021I20.1		SHCBP1		VIL1					PSMB3			UBE2D1				MYLK		RBM6							SRF
																			C2orf72	FUT1		ZWILCH		WFDC10A					PSMC4			UBE2E1				NID2		RGMB							STAT5B
																			PKIB	MAPK8IP2		KPNA2		WFDC10A					PSMC6			UBE2S				NNMT		RNF43							STK11
																			LA16c-321D4.2	ERC2		H2AFX		XCL2					PSMD1			UBN1				NOTCH2		RUNX1							SYK
																			USH1C	SLC4A3		H1F0		ZG16					PSMD14			VENTX				NT5E		SET							TAL1
																			LRRN3	AC009495.2		TUBB							PSMD3			H1F0				NTM		SLC12A2							TGFB2
																			CTD-2089N3.2	LA16c-395F10.2		HIST1H4C							PSMD7			HIST1H1A				OXTR		SMAD2							TGFBR2
																			RP11-333B11.1	RP11-432I5.2		PRC1							PSMD8			HIST1H1C				PCOLCE		SMOC2							THRA
																			AC007389.3	HOXB9		CENPW							PTGES3			HIST1H1D				PCOLCE2		SOX1							NKX2-1
																			PCDH17	SHANK3		MRPS18B							PWP1			HIST1H1E				PDGFRB		SOX11							TRAF6
																			DNAJC12	LFNG		MZT1							RACK1			HIST1H1B				PDLIM4		SOX17							TSC1
																			TPPP3	SLC7A14		KIFC1							RAD23B			H2AFB1				PFN2		SOX2							VEGFA
																			PRR26	HOXB-AS3		KIF22							RAN			HIST1H2AJ				PLAUR		SOX3							WNT7A
																			EFR3B	PRR36									RANBP1			HIST2H2AA3				PLOD1		SOX4							WNT8A
																			PROX1	CHGB									RFC4			HIST2H2AA4				PLOD2		SOX9							WNT11
																			KCNH6	CACNA1H									RNPS1			HIST2H2AC				PLOD3		SPDYE1							WT1
																			RIMBP2	DNAJC12									RPL14			HIST1H2AB				PMEPA1		SPDYE5							ZAP70
																			DOK6	TRIM36									RPL18			HIST1H2AC				PMP22		SPHKAP							EOMES
																			TOX	TMEM176A									RPL22			HIST1H2AD				POSTN		SRGAP2C							SEMA7A
																			RP11-923I11.4	FIBCD1									RPL34			HIST1H2AE				PPIB		STMN1							TNFSF11
																			LINC01419	NELL1									RPL6			H2AFJ				PRRX1		STMN2							TP63
																			RET	LINC00094									RPLP0			H2AFX				PRSS2		TAL1							TNFSF9
																			PGAM2	RP11-297D21.4									RPS10			H2AFZ				PTHLH		TATDN3							FADD
																			RGS4	CLCN4									RPS2			H2AFV				PTX3		TCF12							NRP1
																			QRFP	UNQ6494									RPS3			HIST1H2BA				PVR		TCF4							PROM1
																			KSR2	TMEM170B									RPS5			HIST1H2BI				QSOX1		TDGF1							SLC9A3R1
																			APLP1	PDGFD									RPS6			HIST1H2BJ				RGS4		TFDP2							ATG5
																			PLEKHB1	RP11-134G8.7									RRM1			HIST1H2BK				RHOB		TFRC							SLC4A7
																			JAKMIP1	RP11-475I24.3									RRP9			HIST1H2BL				SAT1		THY1							MAML1
																			CCDC67	PCSK1N									RSL1D1			HIST1H2BM				SCG2		TNFAIP8L1							ZEB2
																			C2CD4B	DNER									RUVBL2			HIST1H2BN				SDC1		TOX3							TSPAN2
																			SRPK3	LYL1									SERBP1			HIST1H2BO				SDC4		TRA2A							SEC24B
																			CXXC4	RIPPLY2									SET			HIST2H2BE				SERPINE1		TSPAN6							BATF
																			CA7	RP11-147L13.15									SF3A1			HIST1H2BB				SERPINE2		UGT8							ZBTB1
																			SPINK14	CST1									SF3B3			HIST1H2BC				SERPINH1		VEGFA							KDM1A
																			C1QL1	EID2B									SLC25A3			HIST1H2BD				SFRP1		ZBTB8A							KDM6B
																			C17orf98	PRR26									SMARCC1			HIST1H2BE				SFRP4		ZNF793							HEY2
																			MAP9	SHISA9									SNRPA			HIST1H2BF				SGCB		ABCG2							SCRIB
																			RIPPLY2	LINC01353									SNRPA1			HIST1H2BG				SGCD		ALDH1A1							TENM4
																			MICAL1	RP11-669E14.6									SNRPB2			HIST1H2BH				SGCG		ALDH1A3							BLOC1S6
																			SLITRK6	DNAJC6									SNRPD1			H2BFS				SLC6A8		DNER							FOXP1
																			PRUNE2	CAMK2B									SNRPD2			HIST3H2BB				SLIT2		MET							BMP10
																			ESPN	AOC1									SNRPD3			H3F3A				SLIT3									IL20
																			C4orf48	MEGF6									SNRPG			H3F3B				SNAI2									CDON
																			SHISA8	HOXB3									SRM			HIST3H3				SNTB1									WDPCP
																			ASCL5	QDPR									SRPK1			HIST1H3A				SPARC									LEF1
																			CSDC2	ADGRV1									SRSF1			HIST1H3H				SPOCK1									IL23A
																			HOXB8	NRCAM									SRSF2			HIST1H3I				SPP1									CLIC5
																			RNF182	MAP2K6									SRSF3			HIST1H3J				TAGLN									DLL4
																			GJA3	RAB6B									SRSF7			HIST2H3D				TFPI2									TMEM100
																			PCDHB15	ALG10B									SSB			HIST2H3C				TGFB1									MCOLN3
																			PCDHGA3	RP11-686O6.2									SSBP1			HIST2H3A				TGFBI									SOX6
																			RANBP3L	ZSCAN31									STARD7			HIST1H3B				TGFBR3									MESP1
																			NGF	RP11-496I9.1									SYNCRIP			HIST1H3C				TGM2									CYP26B1
																			ERC2	TRIM46									TARDBP			HIST1H3D				THBS1									FAM20C
																			DPYSL3	RGS4									TCP1			HIST1H3E				THBS2									OVOL2
																			BEX1	MDM1									TFDP1			HIST1H3F				THY1									SAV1
																			EPN2-AS1	ARHGEF9									TOMM70			HIST1H3G				TIMP1									SEMA4A
																			RP11-532M24.1	FOXM1									TRA2B			HIST4H4				TIMP3									BCL11B
																			LA16c-395F10.2	FSD2									TRIM28			HIST1H4A				TNC									NKAP
																			MROH2A	FSTL4									TUFM			HIST1H4J				TNFAIP3									PDZD7
																			KCNH3	DYNC1I1									TXNL4A			HIST1H4K				TNFRSF11B									WNT5B
																			GPRIN1	RUNDC3A-AS1									TYMS			HIST1H4L				TNFRSF12A									DCSTAMP
																			ADARB2	FAM167A									U2AF1			HIST2H4A				TPM1									GDPD5
																			RP11-347C12.11	RP11-539I5.1									UBA2			HIST2H4B				TPM2									SLITRK6
																			GALR1	DTNA									UBE2E1			HIST1H4B				TPM4									MYLK3
																			PRR36	TRPC1									UBE2L3			HIST1H4C				VCAM1									TMC1
																			AC013463.2	PTPRD									USP1			HIST1H4D				VCAN									OCSTAMP
																			NRCAM	NLRP1									VBP1			HIST1H4E				VEGFA									IL31RA
																			UCP2	MAP9									VDAC1			HIST1H4F				VEGFC									IL23R
																			SPOCK1	SEC22C									VDAC3			HIST1H4H				VIM									GDF7
																			IZUMO4	C4orf48									XPO1			HIST1H4I				WIPF1									NKX2-3
																			NLGN4X	CCDC34									XPOT							WNT5A									STRC
																			TRIM9	GLT8D1									XRCC6																ARX
																			TGM3	GABRB3									YWHAE																GSX2
																			AP001057.1	ZNF174									YWHAQ																LHFPL5
																			RP11-830F9.6	TMEM55A																									ATP11C
																			KRT40	WDR76
																			RP11-247A12.2	RP11-511P7.5
																			MN1	RP11-359B12.2
																			IGFBP5	MAP7D2
																			GDPD5	TRERF1
																			FAM131C	AC005076.5
																			ATG9B	TMEM178B
																			MCF2L2	GNPDA2
																			LCORL	SFXN3
																			OVOS2	KIF1A
																			SYT5	KIF3C
																			RP11-669E14.6	RP11-268G13.1
																			POMK	WDR49
																			GUCA2B	RP11-96H19.1
																			DTNA	C12orf56
																			RIMKLA	AC034243.1
																			LRP2BP	C1QTNF1
																			CHGB	SMYD3
																			SHANK3	PKIB
																			LINC01535	THEMIS2
																			KCNAB1	SEPSECS-AS1
																			RP11-51J9.6	WDR7
																			RP11-380O24.1	MAATS1
																			ADCY10	RP11-380N8.7
																			ARHGEF33	PAX5
																			RP11-130C6.1	TCF19
																			LINC01484	PPP5D1
																			GABRR1	DRC3
																			KCNH2	RP11-93H24.3
																			C12orf71	SOX2
																			AP3B2	TRMT1L
																			LDLRAD4	QPCT
																			MAL	KPNA5
																			PTPN22	PWAR6
																			GPER1	FEV
																			FAM57B	FGF12
																			RP11-25K19.1	TPPP
																			TFF3	GALR1
																			NLRP1	HEY1
																			HOXB2	FAM171B
																			C2CD4A	MGAT5
																			BRWD1-AS2	C16orf45
																			PNMAL1	JMJD1C-AS1
																			PLPP6	LDLRAD4
																			GALR2	SH3BGR
																			HOXB-AS3	PEG10
																			SOX5	TECPR1
																			KISS1R	RP13-753N3.1
																			RP11-964E11.2	KSR2
																			DRAIC	RP11-85A1.3
																			RP11-315I20.1	DPYSL3
																			PPM1H	RP3-323A16.1
																			SEC11C	MEGF9
																			QPCT	IFT172
																			SYN1	C9orf69
																			NDUFA4L2	ESPN
																			FAM131B	RP11-92K15.3
																			CGA	HOXD10
																			TMEM59L	NEURL1
																			UBXN10-AS1	AC006942.4
																			QDPR	TAB1
																			HES6	AC092669.3
																			FGL1	RP11-46J23.1
																			THSD7A	SIGLEC10
																			PEG10	RP11-776H12.1
																			RGL3	ZNF519
																			TMEM61	PLEKHB1
																			SMIM24	FMNL3
																			ZSWIM3	HCLS1
																			AC144831.3	HOXA13
																			KRTAP5-AS1	NANOS3
																			ITGAM	ENTPD8
																			RP11-602N24.3	CEMIP
																			RAB26	GTF3C1
																			RP11-380L11.4	BAIAP3
																			LECT1	FAM189A2
																			CCDC110	RP11-66N11.8
																			GRIK4	PCP4
																			NXPH3	RP11-446N19.1
																			RP11-452H21.4	RP11-127B20.2
																			ATP6V1G2	TIRAP
																			AC034243.1	BBS10
																			CBLB	DACH1
																			CTB-40H15.4	B4GALNT4
																			GOLGA7B	MICAL1
																			SLC46A3	C2CD4B
																			RP11-620J15.4	ACYP1
																			PLXNC1	ASH1L-AS1
																			ACAD11	NAA40
																			SATB2	PECR
																			TUBB2B	RP11-452L6.5
																			LRRC24	THSD1
																			BASP1	CTD-3001H11.2
																			ERICH3	PHYHIPL
																			NKAIN3	PKIG
																			RP11-140I16.3	SYN1
																			CCDC181	ZDHHC17
																			SAPCD1-AS1	TCEA2
																			KLHL32	CADM1
																			DOCK11	DOPEY1
																			SLC29A4	PCLO
																			TEKT4	SLC1A4
																			CTB-171A8.1	C11orf70
																			LDLRAD1	ZNF585A
																			KB-1562D12.1	SCRG1
																			DYNC1I1	RP11-423H2.3
																			AOX1	GTF3C3
																			AC097724.3	CEP112
																			PIPOX	KBTBD3
																			C2orf70	DNALI1
																			RP5-1033H22.2	AC069513.4
																			KCNK12	OVOS2
																			TREM1	CEP162
																			A2M-AS1	HOXB6
																			RP11-131N11.4	SERPINI1
																			CFC1	TRAPPC12-AS1
																			CPE	FAM200A
																			CHN2	FANCF
																			ACVR1C	PSIP1
																			TTLL10	TUBB2B
																			ENO2	ZSCAN16-AS1
																			CNTNAP2	SEPSECS
																			CST1	FAM134B
																			MDS2	GGH
																			CA8	DGCR2
																			SYT14	TIGD1
																			ADAMTS9-AS1	ZNF181
																			ZNF548	FAM150B
																			NEBL	MERTK
																			MYO18A	RP11-105N14.1
																			POPDC3	VGF
																			UCN3	EDEM2
																			SKAP1	CCDC126
																			CCDC154	CTB-55O6.8
																			ARHGEF9	C2orf74
																			ARSA	XX-FW83563B9.5
																			PLAC8	DBNDD1
																			KIAA1211L	ILDR1
																			RP11-173D3.1	NIPSNAP3A
																			POPDC2	UFSP1
																			PSD	ZFP14
																			SYN2	RP11-112J3.16
																			PROSER2-AS1	HOXA11
																			RGS11	WDR19
																			SLC7A14	PAQR8
																			HID1	HES6
																			NRTN	LINC00339
																			PCLO	LRFN3
																			NAAA	VEGFB
																			TMEM55A	MAPRE2
																			CHN1	KLHDC9
																			UNC79	SSX2IP
																			OPRK1	MKL2
																			ELAVL3	BBS2
																			C5orf46	LANCL1
																			CD24	ENO2
																			WNK4	USP6
																			DHDH	LETM2
																			BEST3	CBX7
																			CTB-11I22.1	NEBL
																			CTD-2007H13.3	NBPF1
																			BRINP3	GGT7
																			NPDC1	ANKRD35
																			ZNF571	ASB16-AS1
																			NOS1AP	RP11-356C4.3
																			CACNA1H	SGCE
																			RP1-170O19.17	RCOR3
																			ERBB4	B9D2
																			ICA1L	PIP5K1B
																			SALL2	RIMS2
																			SERPINA11	TSHZ2
																			EAF2	TMEM53
																			EPHA4	IZUMO4
																			AC072062.1	RP11-175O19.4
																			IFI6	ASTE1
																			CLGN	MORN4
																			SEMA3D	CTC-529I10.2
																			NEBL-AS1	AC062017.1
																			TIMM22	SAXO2
																			CTD-2666L21.1	RBP1
																			RP11-422P24.11	KLHL25
																			LINC01146	FAM127C
																			KCNG3	TEF
																			SOX2	CTD-3105H18.14
																			CTD-2095E4.5	CNTLN
																			GSTA4	NOVA1
																			GREB1	SENP7
																			RLN2	EMILIN2
																			MBOAT2	RCBTB1
																			ABHD16A	SYT7
																			RGPD4-AS1	GREB1
																			DNASE1L3	ARHGAP18
																			LINC01091	CYB561D1
																			ABO	LRRC61
																			SNCAIP	PDE5A
																			RP11-53O19.1	CEP126
																			CAMK2N1	ZNF599
																			LINC01481	RP4-639F20.1
																			ZBP1	MED25
																			STARD4-AS1	HHEX
																			RP11-432I5.2	COQ10A
																			P2RX6	DGKQ
																			AC090616.2	ZNF415
																			HLTF	LINC01315
																			UCN	STMN1
																			SCN9A	SLC25A25-AS1
																			GS1-393G12.14	MCF2L
																			ABHD3	RP11-410L14.2
																			TMEM260	EID1
																			RP3-395M20.8	KLHL42
																			ZNF98	HLTF
																			AC093802.1	RAB30
																			LINC01018	CUTC
																			LINC00327	TMEM25
																			TMEM178A	EAF2
																			EFCAB12	SDHAF2
																			RAB3B	DEGS2
																			DPP4	CELF4
																			TNFSF14	RP11-156K23.3
																			CTC-492K19.7	ZNF529-AS1
																			AZGP1	PLAC8
																			SV2A	UCP2
																			MYB	PRKCDBP
																			CFTR	RP5-908M14.9
																			DFNB31	GLG1
																			KLHL25	EPHB4
																			CCP110	RP11-88H9.2
																			AC093642.3	UBR7
																			TUBA4B	GZF1
																			ARHGAP24	BRE
																			RP11-157J24.2	RP3-395M20.8
																			SCGB1B2P	CH17-340M24.3
																			RP11-179B2.2	DNAJC27
																			RP11-434B12.1	ZNF583
																			MAPK12	VWDE
																			KIF5C	TUBG2
																			ADCY2	MYO1F
																			VEGFB	ZNF473
																			PRKACB	ZNF318
																			VPS33A	ZNF250
																			RP11-133K1.6	CLDND2
																			RP11-553A21.3	GPR27
																			AMACR	VPS8
																			AC068282.3	HYKK
																			ABCC8	TXNDC15
																			MAP7D2	NCOA5
																			MAP1B	RP11-166O4.6
																			RP11-586D19.1	MYEF2
																			TIMP2	KBTBD7
																			C3orf14	ZNF283
																			PRELID3A
																			SLC26A4
																			ANK1
																			TTLL7
																			FAM134B
																			LYL1
																			SEC62-AS1
																			RP11-839D17.3
																			FRGCA
																			MAGED1
																			NPTX2
																			RP4-594I10.3
																			TAT-AS1
																			ZSWIM5
																			RASA3
																			RP11-2E11.9
																			MAGEE1
																			RP11-511P7.5
																			ZNF385B
																			SMOC2
																			MRAP2
																			GPR89A
																			ZNF585A
																			C1orf210
																			C10orf10
																			RSAD2
																			GPR173
																			AC022007.5
																			RP11-794G24.1
																			YPEL4
																			CCDC170
																			C12orf56
																			AL589743.1
																			HSF2
																			FAM102A
																			ILDR1
																			ZBTB37
																			MYEF2
																			ZNF446
																			SLC36A1
																			SLC25A34
																			B3GAT1
																			PAXBP1-AS1
																			NRL
																			MFN1
																			DOPEY1
																			RP3-402G11.26
																			PTPRN2
																			AGR3
																			MLLT11
																			TIRAP
																			FOCAD
																			KDELR3
																			NAA40
																			RP11-196G18.3
																			ARAP1
																			ARRDC3
																			SLC35E2
																			USP54
																			GRASP
																			SEPSECS
																			SMCO4
																			PNMA1
																			TACC2
																			COL9A2
																			KIAA1324
																			RECQL4
																			MORN5
																			RP11-679C8.2
																			RHBDD2
																			RNF41
																			ERCC4
																			PLEKHH1
																			LOX
																			CRY2
																			HOXB3
																			ZBTB18
																			RP11-166O4.6
																			HOXB6
																			RP11-844P9.2
																			ZKSCAN3
																			WNT5A-AS1
																			XKR6
																			SPAG5
																			RPH3AL
																			MB
																			CH17-340M24.3
																			MAZ
																			CLDN3
																			OR51E2
																			LINC01353
																			RP11-405M12.3
																			MGARP
																			KRT20
																			CBX7
																			AIDA
																			TNKS2-AS1
																			GUF1
																			FAM96A
																			HSH2D
																			TPD52
																			ATP6V0E2
																			FAM71E1
																			SEC14L1
																			IL20RA
																			RP11-227G15.8
																			PDE6A
																			RP11-484K9.4
																			ATP6V1G1

## Sheet: S3
Supplementary Table S3: Determining copy number affected differentially expressing genes between intra-patient lesions.
Differential expression analysis was conducted between different samples within patients by the FindAllMarker() function in Seurat (v4.3) with the MAST method. The differentially expressing genes (DEGs) were identified as CN affected if the sign of log fold-change agreed with the CN ratio (sample vs patient average). "Nodeg" column shows the number of DEGs for a certain sample while "degnoCN" sho…
patient	p_val	avg_log2FC	pct.1	pct.2	p_val_adj	cluster	gene	NOdeg	degnoCN	CN_ratio	sign	CN	cor	id
CA27	1.45028e-113	-0.323407	0.112	0.247	2.262e-109	CA27_dura_base_skull_13	ABCA13	891	0	1.11111	neg	>1	0.261	neg >1
CA27	2.60629e-160	0.28796	0.405	0.21	4.06503e-156	CA27_dura_base_skull_13	ABCA5	891	0	1.33333	pos	>1	0.261	pos >1
CA27	0	0.513502	0.479	0.176	0	CA27_dura_base_skull_13	ABCC1	891	0	1.33333	pos	>1	0.261	pos >1
CA27	1.88272e-215	0.61223	0.881	0.762	2.93648e-211	CA27_dura_base_skull_13	ABCC4	891	0	1.33333	pos	>1	0.261	pos >1
CA27	6.80155e-294	0.511915	0.661	0.372	1.06084e-289	CA27_dura_base_skull_13	ABCC5	891	0	1.33333	pos	>1	0.261	pos >1
CA27	9.81632e-169	0.306036	0.434	0.231	1.53105e-164	CA27_dura_base_skull_13	ABHD12	891	0	1.5	pos	>1	0.261	pos >1
CA27	5.36146e-130	0.279418	0.335	0.174	8.36227e-126	CA27_dura_base_skull_13	ABHD17C	891	0	1.33333	pos	>1	0.261	pos >1
CA27	0	0.775705	0.626	0.237	0	CA27_dura_base_skull_13	ABHD2	891	0	1.33333	pos	>1	0.261	pos >1
CA27	1.59528e-119	-0.265944	0.093	0.231	2.48815e-115	CA27_dura_base_skull_13	ABLIM3	891	0	1.5	neg	>1	0.261	neg >1
CA27	0	0.428262	0.289	0.057	0	CA27_dura_base_skull_13	ABTB2	891	0	1.33333	pos	>1	0.261	pos >1
CA27	0	0.365633	0.252	0.045	0	CA27_dura_base_skull_13	AC002451.1	891	0	1.11111	pos	>1	0.261	pos >1
CA27	1.19696e-248	-0.704277	0.121	0.331	1.86689e-244	CA27_dura_base_skull_13	AC002460.2	891	0	1.66667	neg	>1	0.261	neg >1
CA27	4.02784e-97	-0.912304	0.067	0.164	6.28222e-93	CA27_dura_base_skull_13	AC004936.1	891	0	1.11111	neg	>1	0.261	neg >1
CA27	0	-0.663265	0.025	0.343	0	CA27_dura_base_skull_13	AC006994.2	891	0	1	neg	<1	0.261	neg <1
CA27	4.85797e-164	-0.525809	0.221	0.396	7.57698e-160	CA27_dura_base_skull_13	AC007319.1	891	0	1	neg	<1	0.261	neg <1
CA27	1.1046e-95	0.327754	0.544	0.38	1.72285e-91	CA27_dura_base_skull_13	AC008014.1	891	0	1.42857	pos	>1	0.261	pos >1
CA27	2.34358e-112	-0.693376	0.262	0.378	3.65529e-108	CA27_dura_base_skull_13	AC008415.1	891	0	1.5	neg	>1	0.261	neg >1
CA27	0	0.63015	0.337	0.011	0	CA27_dura_base_skull_13	AC008574.1	891	0	1.5	pos	>1	0.261	pos >1
CA27	0	-1.50163	0.679	0.829	0	CA27_dura_base_skull_13	AC010983.1	891	0	1	neg	<1	0.261	neg <1
CA27	7.57303e-138	-0.3639	0.107	0.252	1.18116e-133	CA27_dura_base_skull_13	AC011092.2	891	0	1.33333	neg	>1	0.261	neg >1
CA27	2.79398e-79	-0.258162	0.155	0.257	4.35777e-75	CA27_dura_base_skull_13	AC012464.1	891	0	1.42857	neg	>1	0.261	neg >1
CA27	1.5069e-271	-0.349462	0.011	0.173	2.35031e-267	CA27_dura_base_skull_13	AC022034.3	891	0	1.5	neg	>1	0.261	neg >1
CA27	1.99962e-166	-0.742695	0.091	0.236	3.11881e-162	CA27_dura_base_skull_13	AC064875.1	891	0	2	neg	>1	0.261	neg >1
CA27	2.52285e-277	0.596443	0.45	0.223	3.93489e-273	CA27_dura_base_skull_13	AC068587.4	891	0	2	pos	>1	0.261	pos >1
CA27	1.58497e-87	-0.404657	0.46	0.542	2.47208e-83	CA27_dura_base_skull_13	AC068633.1	891	0	1.33333	neg	>1	0.261	neg >1
CA27	3.30727e-187	0.272304	0.241	0.08	5.15835e-183	CA27_dura_base_skull_13	AC078864.1	891	0	1.42857	pos	>1	0.261	pos >1
CA27	5.81712e-243	0.525631	0.664	0.398	9.07297e-239	CA27_dura_base_skull_13	AC079142.1	891	0	1.33333	pos	>1	0.261	pos >1
CA27	2.46079e-168	-0.395865	0.538	0.696	3.8381e-164	CA27_dura_base_skull_13	AC079781.5	891	0	1.11111	neg	>1	0.261	neg >1
CA27	9.09667e-124	-0.330938	0.083	0.207	1.41881e-119	CA27_dura_base_skull_13	AC090709.1	891	0	1.42857	neg	>1	0.261	neg >1
CA27	1.52878e-106	0.251072	0.547	0.374	2.38444e-102	CA27_dura_base_skull_13	AC090796.1	891	0	1.5	pos	>1	0.261	pos >1
CA27	1.62915e-101	0.359643	0.452	0.29	2.54098e-97	CA27_dura_base_skull_13	AC092422.1	891	0	1.33333	pos	>1	0.261	pos >1
CA27	3.09606e-280	-0.858043	0.731	0.855	4.82892e-276	CA27_dura_base_skull_13	AC092691.1	891	0	1.33333	neg	>1	0.261	neg >1
CA27	2.39249e-54	-0.285908	0.304	0.383	3.73157e-50	CA27_dura_base_skull_13	AC093866.1	891	0	1.66667	neg	>1	0.261	neg >1
CA27	1.22017e-49	0.396189	0.17	0.129	1.90309e-45	CA27_dura_base_skull_13	AC093916.1	891	0	1.66667	pos	>1	0.261	pos >1
CA27	6.35774e-65	-0.254998	0.653	0.744	9.91616e-61	CA27_dura_base_skull_13	AC097515.1	891	0	1.25	neg	>1	0.261	neg >1
CA27	1.16745e-252	0.413042	0.483	0.229	1.82088e-248	CA27_dura_base_skull_13	AC098617.1	891	0	1	pos	<1	0.261	pos <1
CA27	3.09639e-110	-0.410335	0.369	0.46	4.82944e-106	CA27_dura_base_skull_13	AC104123.1	891	0	1.33333	neg	>1	0.261	neg >1
CA27	1.24462e-160	-0.375532	0.144	0.31	1.94124e-156	CA27_dura_base_skull_13	AC104170.1	891	0	1.5	neg	>1	0.261	neg >1
CA27	2.22732e-167	0.263811	0.285	0.117	3.47396e-163	CA27_dura_base_skull_13	AC106795.3	891	0	1.25	pos	>1	0.261	pos >1
CA27	1.57243e-227	0.276553	0.177	0.045	2.45251e-223	CA27_dura_base_skull_13	AC108067.1	891	0	1.66667	pos	>1	0.261	pos >1
CA27	0	0.713415	0.819	0.566	0	CA27_dura_base_skull_13	AC108690.1	891	0	1.33333	pos	>1	0.261	pos >1
CA27	1.95105e-42	-0.298642	0.201	0.249	3.04305e-38	CA27_dura_base_skull_13	AC109466.1	891	0	1.33333	neg	>1	0.261	neg >1
CA27	0	0.329346	0.198	0.006	0	CA27_dura_base_skull_13	AC113418.1	891	0	1.5	pos	>1	0.261	pos >1
CA27	3.00514e-129	-0.381658	0.07	0.198	4.68711e-125	CA27_dura_base_skull_13	AC114689.3	891	0	1.2	neg	>1	0.261	neg >1
CA27	7.6242e-100	-0.250594	0.499	0.529	1.18915e-95	CA27_dura_base_skull_13	AC119673.2	891	0	1	neg	<1	0.261	neg <1
CA27	0	-1.2302	0.059	0.526	0	CA27_dura_base_skull_13	ACADL	891	0	1	neg	<1	0.261	neg <1
CA27	1.50901e-116	-0.501896	0.269	0.388	2.3536e-112	CA27_dura_base_skull_13	ACPP	891	0	1.33333	neg	>1	0.261	neg >1
CA27	2.04991e-88	-0.265325	0.147	0.256	3.19725e-84	CA27_dura_base_skull_13	ACVR2A	891	0	1	neg	<1	0.261	neg <1
CA27	6.39626e-112	0.264797	0.497	0.32	9.97624e-108	CA27_dura_base_skull_13	ACYP2	891	0	1.5	pos	>1	0.261	pos >1
CA27	3.75099e-242	0.374121	0.544	0.286	5.85042e-238	CA27_dura_base_skull_13	ADAM10	891	0	1.33333	pos	>1	0.261	pos >1
CA27	1.41215e-199	-0.814849	0.096	0.254	2.20253e-195	CA27_dura_base_skull_13	ADAMTSL1	891	0	1.14286	neg	>1	0.261	neg >1
CA27	8.60989e-67	-0.263704	0.615	0.724	1.34288e-62	CA27_dura_base_skull_13	ADARB1	891	0	1.2	neg	>1	0.261	neg >1
CA27	8.20377e-161	0.292721	0.544	0.33	1.27954e-156	CA27_dura_base_skull_13	ADGRA3	891	0	1.25	pos	>1	0.261	pos >1
CA27	0	-0.937916	0.014	0.273	0	CA27_dura_base_skull_13	ADGRB3	891	0	1.33333	neg	>1	0.261	neg >1
CA27	1.99198e-286	-0.595146	0.121	0.356	3.1069e-282	CA27_dura_base_skull_13	ADGRL2	891	0	1.5	neg	>1	0.261	neg >1
CA27	2.53882e-66	-0.303613	0.952	0.971	3.9598e-62	CA27_dura_base_skull_13	AF117829.1	891	0	1.5	neg	>1	0.261	neg >1
CA27	1.11081e-230	-0.752338	0.178	0.367	1.73253e-226	CA27_dura_base_skull_13	AF165147.1	891	0	1.2	neg	>1	0.261	neg >1
CA27	2.2694e-78	0.251332	0.877	0.808	3.53959e-74	CA27_dura_base_skull_13	AFF1	891	0	1.66667	pos	>1	0.261	pos >1
CA27	0	0.850938	0.822	0.538	0	CA27_dura_base_skull_13	AFF3	891	0	2	pos	>1	0.261	pos >1
CA27	0	0.587756	0.972	0.922	0	CA27_dura_base_skull_13	AGAP1	891	0	1	pos	<1	0.261	pos <1
CA27	1.63519e-160	-0.312789	0.116	0.281	2.5504e-156	CA27_dura_base_skull_13	AGBL3	891	0	1.11111	neg	>1	0.261	neg >1
CA27	1.51772e-213	0.554516	0.816	0.621	2.36719e-209	CA27_dura_base_skull_13	AGBL4	891	0	1.5	pos	>1	0.261	pos >1
CA27	1.12583e-151	0.327802	0.65	0.442	1.75596e-147	CA27_dura_base_skull_13	AIG1	891	0	1.33333	pos	>1	0.261	pos >1
CA27	2.02454e-226	0.334045	0.401	0.176	3.15768e-222	CA27_dura_base_skull_13	AK4	891	0	1.5	pos	>1	0.261	pos >1
CA27	4.20035e-129	0.259835	0.591	0.397	6.55129e-125	CA27_dura_base_skull_13	AKAP10	891	0	1.33333	pos	>1	0.261	pos >1
CA27	0	1.5948	0.816	0.485	0	CA27_dura_base_skull_13	AKAP12	891	0	1.33333	pos	>1	0.261	pos >1
CA27	0	0.926734	0.915	0.561	0	CA27_dura_base_skull_13	AKAP13	891	0	1.33333	pos	>1	0.261	pos >1
CA27	8.11694e-81	-0.270082	0.071	0.159	1.266e-76	CA27_dura_base_skull_13	AL050309.1	891	0	1.33333	neg	>1	0.261	neg >1
CA27	3.39523e-75	-0.256024	0.065	0.156	5.29554e-71	CA27_dura_base_skull_13	AL078604.4	891	0	1.33333	neg	>1	0.261	neg >1
CA27	8.11089e-137	-0.443691	0.599	0.728	1.26506e-132	CA27_dura_base_skull_13	AL110292.1	891	0	1.11111	neg	>1	0.261	neg >1
CA27	5.4466e-46	-0.298097	0.535	0.588	8.49506e-42	CA27_dura_base_skull_13	AL121790.1	891	0	1.11111	neg	>1	0.261	neg >1
CA27	0	-0.65737	0.007	0.233	0	CA27_dura_base_skull_13	AL135878.1	891	0	1.11111	neg	>1	0.261	neg >1
CA27	2.29033e-130	-0.313441	0.11	0.257	3.57223e-126	CA27_dura_base_skull_13	AL157911.1	891	0	1.11111	neg	>1	0.261	neg >1
CA27	1.63332e-109	-0.50766	0.279	0.41	2.54749e-105	CA27_dura_base_skull_13	AL163541.1	891	0	1.33333	neg	>1	0.261	neg >1
CA27	0	-1.21815	0.266	0.646	0	CA27_dura_base_skull_13	AL356737.2	891	0	1.33333	neg	>1	0.261	neg >1
CA27	2.5784e-116	0.309622	0.38	0.215	4.02153e-112	CA27_dura_base_skull_13	AL365295.1	891	0	1.11111	pos	>1	0.261	pos >1
CA27	2.83714e-102	-0.36209	0.333	0.448	4.42509e-98	CA27_dura_base_skull_13	AL645568.1	891	0	1	neg	<1	0.261	neg <1
CA27	1.27646e-164	-0.416286	0.973	0.99	1.9909e-160	CA27_dura_base_skull_13	ALCAM	891	0	1.33333	neg	>1	0.261	neg >1
CA27	9.72859e-139	0.299354	0.312	0.148	1.51737e-134	CA27_dura_base_skull_13	ALDH1A2	891	0	1.33333	pos	>1	0.261	pos >1
CA27	4.7492e-143	0.279808	0.471	0.276	7.40732e-139	CA27_dura_base_skull_13	ALG13	891	0	1.33333	pos	>1	0.261	pos >1
CA27	7.91103e-173	0.420825	0.327	0.147	1.23388e-168	CA27_dura_base_skull_13	AMACR	891	0	1	pos	<1	0.261	pos <1
CA27	1.01034e-49	-0.260406	0.586	0.683	1.57583e-45	CA27_dura_base_skull_13	AMD1	891	0	1.33333	neg	>1	0.261	neg >1
CA27	1.22161e-204	-0.514632	0.468	0.648	1.90534e-200	CA27_dura_base_skull_13	AMOTL1	891	0	1.33333	neg	>1	0.261	neg >1
CA27	0	0.350327	0.204	0.027	0	CA27_dura_base_skull_13	AMPD3	891	0	1.33333	pos	>1	0.261	pos >1
CA27	0	0.545044	0.381	0.109	0	CA27_dura_base_skull_13	ANGPTL4	891	0	1.33333	pos	>1	0.261	pos >1
CA27	1.13842e-72	-0.289531	0.91	0.958	1.77559e-68	CA27_dura_base_skull_13	ANK3	891	0	1.33333	neg	>1	0.261	neg >1
CA27	2.33751e-196	0.539778	0.861	0.752	3.64581e-192	CA27_dura_base_skull_13	ANKH	891	0	1.6	pos	>1	0.261	pos >1
CA27	1.68378e-141	0.286366	0.348	0.179	2.62619e-137	CA27_dura_base_skull_13	ANKRA2	891	0	1.5	pos	>1	0.261	pos >1
CA27	7.84625e-236	0.430758	0.661	0.411	1.22378e-231	CA27_dura_base_skull_13	ANKRD11	891	0	1.33333	pos	>1	0.261	pos >1
CA27	7.38849e-86	-0.328139	0.796	0.865	1.15238e-81	CA27_dura_base_skull_13	ANKRD12	891	0	1.2	neg	>1	0.261	neg >1
CA27	1.62959e-210	0.332851	0.336	0.147	2.54167e-206	CA27_dura_base_skull_13	ANKRD13A	891	0	1.42857	pos	>1	0.261	pos >1
CA27	0	0.392874	0.264	0.024	0	CA27_dura_base_skull_13	ANKRD22	891	0	1.33333	pos	>1	0.261	pos >1
CA27	4.73471e-139	0.263311	0.343	0.173	7.38473e-135	CA27_dura_base_skull_13	ANKRD36	891	0	2	pos	>1	0.261	pos >1
CA27	1.31037e-208	0.285622	0.277	0.1	2.04378e-204	CA27_dura_base_skull_13	ANKRD36B	891	0	2	pos	>1	0.261	pos >1
CA27	5.24098e-290	0.681532	0.261	0.077	8.17436e-286	CA27_dura_base_skull_13	ANKRD37	891	0	1.66667	pos	>1	0.261	pos >1
CA27	1.55511e-71	-0.253315	0.192	0.27	2.42551e-67	CA27_dura_base_skull_13	ANKRD50	891	0	1.66667	neg	>1	0.261	neg >1
CA27	1.43063e-238	0.70573	0.763	0.618	2.23136e-234	CA27_dura_base_skull_13	ANOS1	891	0	1.33333	pos	>1	0.261	pos >1
CA27	4.2173e-96	-0.415678	0.722	0.779	6.57772e-92	CA27_dura_base_skull_13	ANTXR2	891	0	1.66667	neg	>1	0.261	neg >1
CA27	1.21584e-100	-0.328472	0.351	0.472	1.89635e-96	CA27_dura_base_skull_13	AP001011.1	891	0	1.2	neg	>1	0.261	neg >1
CA27	1.06749e-153	0.311493	0.499	0.297	1.66496e-149	CA27_dura_base_skull_13	AP002495.1	891	0	1.33333	pos	>1	0.261	pos >1
CA27	7.18185e-295	0.464419	0.782	0.532	1.12015e-290	CA27_dura_base_skull_13	AP3B1	891	0	1.5	pos	>1	0.261	pos >1
CA27	2.35422280243354e-320	0.449811	0.611	0.313	3.67188130495559e-316	CA27_dura_base_skull_13	AP3S1	891	0	1.5	pos	>1	0.261	pos >1
CA27	3.4153e-172	0.381661	0.648	0.438	5.32685e-168	CA27_dura_base_skull_13	APPL2	891	0	1.42857	pos	>1	0.261	pos >1
CA27	5.92055e-265	-0.825252	0.464	0.647	9.23428e-261	CA27_dura_base_skull_13	AR	891	0	1.33333	neg	>1	0.261	neg >1
CA27	5.42041e-143	0.337671	0.338	0.166	8.45422e-139	CA27_dura_base_skull_13	ARHGAP18	891	0	1.33333	pos	>1	0.261	pos >1
CA27	5.86826e-199	0.525245	0.616	0.379	9.15272e-195	CA27_dura_base_skull_13	ARHGAP24	891	0	1.66667	pos	>1	0.261	pos >1
CA27	0	0.587168	0.92	0.822	0	CA27_dura_base_skull_13	ARHGAP26	891	0	1.33333	pos	>1	0.261	pos >1
CA27	7.56292e-243	0.443888	0.914	0.832	1.17959e-238	CA27_dura_base_skull_13	ARHGAP32	891	0	1.33333	pos	>1	0.261	pos >1
CA27	1.07209e-160	0.301735	0.425	0.226	1.67213e-156	CA27_dura_base_skull_13	ARHGAP44	891	0	1.33333	pos	>1	0.261	pos >1
CA27	6.95078e-224	-0.470006	0.68	0.848	1.08411e-219	CA27_dura_base_skull_13	ARHGAP5	891	0	1.11111	neg	>1	0.261	neg >1
CA27	2.57511e-150	0.297714	0.393	0.212	4.0164e-146	CA27_dura_base_skull_13	ARHGEF10	891	0	1.5	pos	>1	0.261	pos >1
CA27	3.39993e-176	0.260057	0.457	0.248	5.30288e-172	CA27_dura_base_skull_13	ARHGEF10L	891	0	1.5	pos	>1	0.261	pos >1
CA27	1.53899e-147	-0.458391	0.768	0.864	2.40036e-143	CA27_dura_base_skull_13	ARHGEF12	891	0	1.33333	neg	>1	0.261	neg >1
CA27	6.48255e-300	0.518105	0.478	0.209	1.01108e-295	CA27_dura_base_skull_13	ARHGEF28	891	0	1.5	pos	>1	0.261	pos >1
CA27	9.3331e-140	0.287542	0.437	0.249	1.45568e-135	CA27_dura_base_skull_13	ARHGEF3	891	0	1.33333	pos	>1	0.261	pos >1
CA27	0	0.788467	0.834	0.516	0	CA27_dura_base_skull_13	ARHGEF38	891	0	1.66667	pos	>1	0.261	pos >1
CA27	9.85719e-283	0.452138	0.796	0.564	1.53743e-278	CA27_dura_base_skull_13	ARHGEF7	891	0	1.33333	pos	>1	0.261	pos >1
CA27	2.87061e-100	-0.418823	0.589	0.712	4.47729e-96	CA27_dura_base_skull_13	ARID5B	891	0	1.33333	neg	>1	0.261	neg >1
CA27	0	0.61937	0.869	0.655	0	CA27_dura_base_skull_13	ARL15	891	0	1.2	pos	>1	0.261	pos >1
CA27	1.08329e-230	0.596828	0.764	0.616	1.68961e-226	CA27_dura_base_skull_13	ARLNC1	891	0	1.33333	pos	>1	0.261	pos >1
CA27	3.25753e-129	0.26944	0.579	0.385	5.08077e-125	CA27_dura_base_skull_13	ARMH3	891	0	1.33333	pos	>1	0.261	pos >1
CA27	1.09861e-189	0.296183	0.317	0.131	1.71349e-185	CA27_dura_base_skull_13	ARNT2	891	0	1.33333	pos	>1	0.261	pos >1
CA27	3.20457e-153	0.294671	0.432	0.238	4.99818e-149	CA27_dura_base_skull_13	ARRB1	891	0	1.33333	pos	>1	0.261	pos >1
CA27	2.43863e-232	0.431427	0.783	0.562	3.80353e-228	CA27_dura_base_skull_13	ASAP1	891	0	1.5	pos	>1	0.261	pos >1
CA27	0	0.63218	0.558	0.208	0	CA27_dura_base_skull_13	ASAP2	891	0	2	pos	>1	0.261	pos >1
CA27	0	-1.17631	0.72	0.918	0	CA27_dura_base_skull_13	ASCC3	891	0	1.33333	neg	>1	0.261	neg >1
CA27	0	-0.467964	0.92	0.985	0	CA27_dura_base_skull_13	ASH1L	891	0	1	neg	<1	0.261	neg <1
CA27	6.87029e-249	0.454744	0.775	0.521	1.07156e-244	CA27_dura_base_skull_13	ASPH	891	0	1.5	pos	>1	0.261	pos >1
CA27	4.2767e-87	0.391343	0.956	0.97	6.67038e-83	CA27_dura_base_skull_13	ASTN2	891	0	1.33333	pos	>1	0.261	pos >1
CA27	1.21678e-221	0.533861	0.553	0.331	1.8978e-217	CA27_dura_base_skull_13	ATAD2	891	0	1.5	pos	>1	0.261	pos >1
CA27	9.51703e-144	0.318649	0.574	0.373	1.48437e-139	CA27_dura_base_skull_13	ATE1	891	0	1.33333	pos	>1	0.261	pos >1
CA27	0	-0.558655	0.649	0.859	0	CA27_dura_base_skull_13	ATF6	891	0	1	neg	<1	0.261	neg <1
CA27	3.57573e-191	0.407694	0.824	0.669	5.57707e-187	CA27_dura_base_skull_13	ATG10	891	0	1.5	pos	>1	0.261	pos >1
CA27	1.86269e-131	0.288978	0.626	0.431	2.90524e-127	CA27_dura_base_skull_13	ATP2A2	891	0	1.42857	pos	>1	0.261	pos >1
CA27	6.08444e-173	0.389577	0.901	0.815	9.4899e-169	CA27_dura_base_skull_13	ATP2C1	891	0	1.33333	pos	>1	0.261	pos >1
CA27	5.11003e-218	0.374288	0.641	0.391	7.97012e-214	CA27_dura_base_skull_13	ATP6V1H	891	0	1.5	pos	>1	0.261	pos >1
CA27	0	0.600973	0.549	0.248	0	CA27_dura_base_skull_13	ATP8A2	891	0	1.33333	pos	>1	0.261	pos >1
CA27	0	0.645976	0.837	0.521	0	CA27_dura_base_skull_13	BABAM2	891	0	2	pos	>1	0.261	pos >1
CA27	3.85095e-98	0.296109	0.896	0.808	6.00633e-94	CA27_dura_base_skull_13	BACE2	891	0	1.2	pos	>1	0.261	pos >1
CA27	2.56803e-174	-0.483748	0.4	0.567	4.00536e-170	CA27_dura_base_skull_13	BACH1	891	0	1.2	neg	>1	0.261	neg >1
CA27	9.29926e-195	-0.511118	0.806	0.914	1.45041e-190	CA27_dura_base_skull_13	BASP1	891	0	1.6	neg	>1	0.261	neg >1
CA27	4.95714e-117	-0.312205	0.594	0.745	7.73166e-113	CA27_dura_base_skull_13	BAZ1A	891	0	1.11111	neg	>1	0.261	neg >1
CA27	2.0851e-65	-0.289412	0.481	0.574	3.25213e-61	CA27_dura_base_skull_13	BAZ2B	891	0	1	neg	<1	0.261	neg <1
CA27	1.08079e-116	-0.420521	0.532	0.659	1.68571e-112	CA27_dura_base_skull_13	BBS9	891	0	1.11111	neg	>1	0.261	neg >1
CA27	0	0.511471	0.334	0.071	0	CA27_dura_base_skull_13	BCAS1	891	0	1.5	pos	>1	0.261	pos >1
CA27	0	0.397907	0.225	0.016	0	CA27_dura_base_skull_13	BCL11A	891	0	1.5	pos	>1	0.261	pos >1
CA27	1.38307e-216	0.437185	0.385	0.169	2.15718e-212	CA27_dura_base_skull_13	BCL2	891	0	1.2	pos	>1	0.261	pos >1
CA27	2.35273e-202	0.255675	0.264	0.09	3.66956e-198	CA27_dura_base_skull_13	BDH1	891	0	1.33333	pos	>1	0.261	pos >1
CA27	0	0.8435	0.664	0.265	0	CA27_dura_base_skull_13	BICD1	891	0	1.5	pos	>1	0.261	pos >1
CA27	7.16975e-130	0.270567	0.886	0.814	1.11827e-125	CA27_dura_base_skull_13	BIRC6	891	0	1.5	pos	>1	0.261	pos >1
CA27	3.0859e-131	0.305026	0.238	0.134	4.81308e-127	CA27_dura_base_skull_13	BLCAP	891	0	1.5	pos	>1	0.261	pos >1
CA27	0	0.501708	0.74	0.423	0	CA27_dura_base_skull_13	BMPR1A	891	0	1.33333	pos	>1	0.261	pos >1
CA27	1.6153e-264	0.595048	0.99	0.977	2.51938e-260	CA27_dura_base_skull_13	BMPR1B	891	0	1.66667	pos	>1	0.261	pos >1
CA27	1.38444e-99	-0.325608	0.068	0.169	2.15932e-95	CA27_dura_base_skull_13	BNC2	891	0	1.14286	neg	>1	0.261	neg >1
CA27	0	0.591905	0.459	0.144	0	CA27_dura_base_skull_13	BNIP3	891	0	1.33333	pos	>1	0.261	pos >1
CA27	3.8198e-220	0.361941	0.337	0.135	5.95773e-216	CA27_dura_base_skull_13	BNIP3L	891	0	2	pos	>1	0.261	pos >1
CA27	0	0.785002	0.561	0.234	0	CA27_dura_base_skull_13	BORCS5	891	0	1.2	pos	>1	0.261	pos >1
CA27	1.68497e-245	-0.460659	0.914	0.963	2.62804e-241	CA27_dura_base_skull_13	BRAF	891	0	1.11111	neg	>1	0.261	neg >1
CA27	0	0.561113	0.405	0.135	0	CA27_dura_base_skull_13	BRIP1	891	0	1.33333	pos	>1	0.261	pos >1
CA27	1.90501e-88	0.254508	0.845	0.78	2.97124e-84	CA27_dura_base_skull_13	BTRC	891	0	1.33333	pos	>1	0.261	pos >1
CA27	1.36261e-157	-0.60281	0.601	0.691	2.12527e-153	CA27_dura_base_skull_13	C2orf27A	891	0	1	neg	<1	0.261	neg <1
CA27	7.32926e-160	0.294702	0.248	0.097	1.14315e-155	CA27_dura_base_skull_13	C3orf67	891	0	1.33333	pos	>1	0.261	pos >1
CA27	0	0.336684	0.223	0.044	6.32976e-305	CA27_dura_base_skull_13	C4orf47	891	0	1.66667	pos	>1	0.261	pos >1
CA27	8.18469e-147	0.274865	0.397	0.215	1.27657e-142	CA27_dura_base_skull_13	CABIN1	891	0	1.5	pos	>1	0.261	pos >1
CA27	4.73553e-241	0.623228	0.917	0.815	7.386e-237	CA27_dura_base_skull_13	CACNA1D	891	0	1.33333	pos	>1	0.261	pos >1
CA27	0	-0.644215	0.899	0.977	0	CA27_dura_base_skull_13	CADPS2	891	0	1.11111	neg	>1	0.261	neg >1
CA27	1.71961e-305	0.448648	0.23	0.051	2.68208e-301	CA27_dura_base_skull_13	CAMK1D	891	0	1.33333	pos	>1	0.261	pos >1
CA27	1.8095e-149	0.289692	0.612	0.403	2.82227e-145	CA27_dura_base_skull_13	CAMKMT	891	0	2	pos	>1	0.261	pos >1
CA27	3.84999e-223	-0.455985	0.795	0.92	6.00482e-219	CA27_dura_base_skull_13	CAMSAP2	891	0	1	neg	<1	0.261	neg <1
CA27	2.89053e-129	0.274873	0.334	0.171	4.50836e-125	CA27_dura_base_skull_13	CASC2	891	0	1.33333	pos	>1	0.261	pos >1
CA27	1.0998e-122	0.25207	0.452	0.272	1.71535e-118	CA27_dura_base_skull_13	CASK	891	0	1.33333	pos	>1	0.261	pos >1
CA27	1.40896e-138	0.254601	0.823	0.642	2.19756e-134	CA27_dura_base_skull_13	CATSPERB	891	0	1.11111	pos	>1	0.261	pos >1
CA27	0	0.611639	0.896	0.788	0	CA27_dura_base_skull_13	CBFA2T2	891	0	1.25	pos	>1	0.261	pos >1
CA27	7.33065e-127	0.374518	0.533	0.365	1.14336e-122	CA27_dura_base_skull_13	CBWD1	891	0	1.14286	pos	>1	0.261	pos >1
CA27	2.85244e-221	0.379859	0.629	0.378	4.44895e-217	CA27_dura_base_skull_13	CCDC125	891	0	1.5	pos	>1	0.261	pos >1
CA27	4.57186e-196	0.358092	0.457	0.234	7.13073e-192	CA27_dura_base_skull_13	CCDC171	891	0	1.14286	pos	>1	0.261	pos >1
CA27	0	0.948537	0.679	0.23	0	CA27_dura_base_skull_13	CCDC50	891	0	1.33333	pos	>1	0.261	pos >1
CA27	3.71089e-122	0.251464	0.557	0.37	5.78787e-118	CA27_dura_base_skull_13	CCNY	891	0	1.33333	pos	>1	0.261	pos >1
CA27	5.9306e-152	-0.418194	0.924	0.976	9.24995e-148	CA27_dura_base_skull_13	CCSER1	891	0	1.66667	neg	>1	0.261	neg >1
CA27	4.05612e-135	-0.376296	0.791	0.895	6.32633e-131	CA27_dura_base_skull_13	CD46	891	0	1	neg	<1	0.261	neg <1
CA27	1.04979e-103	0.358731	0.749	0.587	1.63735e-99	CA27_dura_base_skull_13	CDC14A	891	0	1.5	pos	>1	0.261	pos >1
CA27	1.59897e-118	-0.500646	0.571	0.635	2.49392e-114	CA27_dura_base_skull_13	CDC14B	891	0	1.14286	neg	>1	0.261	neg >1
CA27	1.05161e-78	-0.291042	0.45	0.544	1.64019e-74	CA27_dura_base_skull_13	CDC42BPA	891	0	1.33333	neg	>1	0.261	neg >1
CA27	0	0.695205	0.744	0.376	0	CA27_dura_base_skull_13	CDH26	891	0	1.5	pos	>1	0.261	pos >1
CA27	4.70715e-62	-0.27265	0.163	0.271	7.34174e-58	CA27_dura_base_skull_13	CDH6	891	0	1	neg	<1	0.261	neg <1
CA27	7.28765e-136	-0.29645	0.77	0.891	1.13665e-131	CA27_dura_base_skull_13	CDK13	891	0	1.11111	neg	>1	0.261	neg >1
CA27	3.82e-124	0.251467	0.541	0.353	5.95805e-120	CA27_dura_base_skull_13	CDK17	891	0	1.42857	pos	>1	0.261	pos >1
CA27	3.31992e-98	0.303757	0.912	0.914	5.17809e-94	CA27_dura_base_skull_13	CDKAL1	891	0	1.33333	pos	>1	0.261	pos >1
CA27	4.59073e-139	0.315454	0.331	0.164	7.16017e-135	CA27_dura_base_skull_13	CDKN2B-AS1	891	0	1.14286	pos	>1	0.261	pos >1
CA27	4.11279e-133	-0.509825	0.478	0.62	6.41471e-129	CA27_dura_base_skull_13	CDYL2	891	0	1.33333	neg	>1	0.261	neg >1
CA27	5.3428e-159	0.296498	0.328	0.15	8.33317e-155	CA27_dura_base_skull_13	CENPK	891	0	1.5	pos	>1	0.261	pos >1
CA27	3.34807e-197	0.571338	0.698	0.475	5.22199e-193	CA27_dura_base_skull_13	CENPP	891	0	1.14286	pos	>1	0.261	pos >1
CA27	4.83576e-153	0.310707	0.521	0.314	7.54233e-149	CA27_dura_base_skull_13	CEP112	891	0	1.33333	pos	>1	0.261	pos >1
CA27	3.36569e-149	0.290091	0.509	0.306	5.24946e-145	CA27_dura_base_skull_13	CEP192	891	0	1.2	pos	>1	0.261	pos >1
CA27	3.66477e-173	0.251753	0.281	0.115	5.71594e-169	CA27_dura_base_skull_13	CEP250	891	0	1.25	pos	>1	0.261	pos >1
CA27	1.24359e-124	0.272236	0.577	0.386	1.93962e-120	CA27_dura_base_skull_13	CEP83	891	0	1.42857	pos	>1	0.261	pos >1
CA27	7.08106e-139	0.261735	0.321	0.158	1.10443e-134	CA27_dura_base_skull_13	CEP89	891	0	1.33333	pos	>1	0.261	pos >1
CA27	1.10107e-213	-0.671458	0.729	0.788	1.71734e-209	CA27_dura_base_skull_13	CERS6	891	0	1	neg	<1	0.261	neg <1
CA27	0	-0.681668	0.134	0.409	0	CA27_dura_base_skull_13	CFAP161	891	0	1.33333	neg	>1	0.261	neg >1
CA27	0	-0.713382	0.24	0.503	0	CA27_dura_base_skull_13	CFAP69	891	0	1.11111	neg	>1	0.261	neg >1
CA27	5.96185e-131	0.414953	0.563	0.377	9.2987e-127	CA27_dura_base_skull_13	CHD7	891	0	1.5	pos	>1	0.261	pos >1
CA27	0	0.51289	0.625	0.315	0	CA27_dura_base_skull_13	CHSY1	891	0	1.33333	pos	>1	0.261	pos >1
CA27	2.37392e-215	0.293088	0.256	0.086	3.7026e-211	CA27_dura_base_skull_13	CLCN5	891	0	1.33333	pos	>1	0.261	pos >1
CA27	1.13686e-184	0.383509	0.726	0.506	1.77316e-180	CA27_dura_base_skull_13	CMC1	891	0	1.33333	pos	>1	0.261	pos >1
CA27	0	0.870906	0.626	0.302	0	CA27_dura_base_skull_13	CNKSR3	891	0	1.33333	pos	>1	0.261	pos >1
CA27	1.61444e-250	0.44813	0.474	0.225	2.51804e-246	CA27_dura_base_skull_13	CNNM2	891	0	1.33333	pos	>1	0.261	pos >1
CA27	1.06782e-128	0.279871	0.863	0.786	1.66547e-124	CA27_dura_base_skull_13	CNOT2	891	0	1.42857	pos	>1	0.261	pos >1
CA27	0	-1.78819	0.359	0.752	0	CA27_dura_base_skull_13	CNTNAP2	891	0	1.11111	neg	>1	0.261	neg >1
CA27	4.12306e-146	-0.362144	0.871	0.944	6.43073e-142	CA27_dura_base_skull_13	COG5	891	0	1.11111	neg	>1	0.261	neg >1
CA27	0	0.827226	0.47	0.126	0	CA27_dura_base_skull_13	COL25A1	891	0	1.66667	pos	>1	0.261	pos >1
CA27	4.50619e-230	0.392414	0.405	0.179	7.02831e-226	CA27_dura_base_skull_13	COL28A1	891	0	1.25	pos	>1	0.261	pos >1
CA27	7.67941e-192	0.588556	0.903	0.843	1.19776e-187	CA27_dura_base_skull_13	CPE	891	0	1.66667	pos	>1	0.261	pos >1
CA27	3.10777e-120	0.293176	0.493	0.313	4.84719e-116	CA27_dura_base_skull_13	CPEB3	891	0	1.33333	pos	>1	0.261	pos >1
CA27	0	-0.632035	0.976	0.971	0	CA27_dura_base_skull_13	CPNE4	891	0	1.33333	neg	>1	0.261	neg >1
CA27	1.40365e-162	0.446677	0.411	0.232	2.18927e-158	CA27_dura_base_skull_13	CREB3L2	891	0	1.11111	pos	>1	0.261	pos >1
CA27	2.73377e-258	0.535772	0.66	0.391	4.26386e-254	CA27_dura_base_skull_13	CRIM1	891	0	1.5	pos	>1	0.261	pos >1
CA27	8.11439e-174	-0.506387	0.364	0.514	1.2656e-169	CA27_dura_base_skull_13	CROT	891	0	1.11111	neg	>1	0.261	neg >1
CA27	1.04746e-85	-0.315243	0.273	0.338	1.63372e-81	CA27_dura_base_skull_13	CRYBG1	891	0	1.33333	neg	>1	0.261	neg >1
CA27	0	0.788062	0.83	0.465	0	CA27_dura_base_skull_13	CSGALNACT1	891	0	2	pos	>1	0.261	pos >1
CA27	1.7611e-130	0.270606	0.514	0.323	2.74679e-126	CA27_dura_base_skull_13	CTDSPL	891	0	1.33333	pos	>1	0.261	pos >1
CA27	1.72093e-105	-0.2945	0.471	0.61	2.68413e-101	CA27_dura_base_skull_13	CUL3	891	0	1	neg	<1	0.261	neg <1
CA27	7.90348e-184	0.338829	0.984	0.987	1.23271e-179	CA27_dura_base_skull_13	CUX1	891	0	1.11111	pos	>1	0.261	pos >1
CA27	1.76919e-205	0.327056	0.397	0.185	2.75941e-201	CA27_dura_base_skull_13	CYFIP2	891	0	1.5	pos	>1	0.261	pos >1
CA27	1.0067e-57	-0.304815	0.192	0.248	1.57015e-53	CA27_dura_base_skull_13	CYP4X1	891	0	1.5	neg	>1	0.261	neg >1
CA27	3.73263e-94	-0.30946	0.491	0.53	5.82179e-90	CA27_dura_base_skull_13	CYTH3	891	0	1.25	neg	>1	0.261	neg >1
CA27	7.13269e-147	-0.341278	0.459	0.541	1.11249e-142	CA27_dura_base_skull_13	DAP3	891	0	1	neg	<1	0.261	neg <1
CA27	0	-0.574312	0.867	0.965	0	CA27_dura_base_skull_13	DCAF6	891	0	1	neg	<1	0.261	neg <1
CA27	2.21248e-196	0.350694	0.386	0.179	3.45081e-192	CA27_dura_base_skull_13	DCLK2	891	0	1.66667	pos	>1	0.261	pos >1
CA27	1.39692e-243	0.406771	0.951	0.924	2.17878e-239	CA27_dura_base_skull_13	DENND1A	891	0	1.33333	pos	>1	0.261	pos >1
CA27	9.43136e-122	-0.362695	0.725	0.822	1.47101e-117	CA27_dura_base_skull_13	DENND1B	891	0	1	neg	<1	0.261	neg <1
CA27	1.37511e-149	0.28114	0.458	0.26	2.14477e-145	CA27_dura_base_skull_13	DENND5A	891	0	1.33333	pos	>1	0.261	pos >1
CA27	2.34368e-189	0.32443	0.53	0.302	3.65544e-185	CA27_dura_base_skull_13	DENR	891	0	1.25	pos	>1	0.261	pos >1
CA27	8.60177e-174	0.29972	0.373	0.178	1.34162e-169	CA27_dura_base_skull_13	DERA	891	0	1.2	pos	>1	0.261	pos >1
CA27	4.47697e-131	-0.280578	0.132	0.281	6.98273e-127	CA27_dura_base_skull_13	DHRS7	891	0	1.11111	neg	>1	0.261	neg >1
CA27	1.31053e-282	0.429321	0.648	0.365	2.04403e-278	CA27_dura_base_skull_13	DIP2C	891	0	1.33333	pos	>1	0.261	pos >1
CA27	4.88051e-230	0.254337	0.196	0.044	7.61213e-226	CA27_dura_base_skull_13	DLC1	891	0	2	pos	>1	0.261	pos >1
CA27	2.18335e-133	0.311886	0.552	0.36	3.40537e-129	CA27_dura_base_skull_13	DLG5	891	0	1.33333	pos	>1	0.261	pos >1
CA27	5.83141e-167	0.371166	0.494	0.295	9.09526e-163	CA27_dura_base_skull_13	DLGAP4	891	0	1.5	pos	>1	0.261	pos >1
CA27	8.3046e-292	0.554282	0.372	0.132	1.29527e-287	CA27_dura_base_skull_13	DNAH11	891	0	1.11111	pos	>1	0.261	pos >1
CA27	1.44485e-72	-0.504755	0.369	0.421	2.25353e-68	CA27_dura_base_skull_13	DNAH5	891	0	1.6	neg	>1	0.261	neg >1
CA27	0	0.768293	0.536	0.089	0	CA27_dura_base_skull_13	DNAJC12	891	0	1.33333	pos	>1	0.261	pos >1
CA27	1.04355e-164	0.305812	0.619	0.4	1.62762e-160	CA27_dura_base_skull_13	DNAJC5	891	0	1.5	pos	>1	0.261	pos >1
CA27	2.75839e-201	0.353532	0.496	0.276	4.30225e-197	CA27_dura_base_skull_13	DNASE1	891	0	1.33333	pos	>1	0.261	pos >1
CA27	1.66024e-136	0.302903	0.423	0.25	2.58947e-132	CA27_dura_base_skull_13	DNM2	891	0	1.33333	pos	>1	0.261	pos >1
CA27	8.05894e-152	0.26334	0.34	0.167	1.25695e-147	CA27_dura_base_skull_13	DNMT3A	891	0	2	pos	>1	0.261	pos >1
CA27	2.12824e-197	0.351613	0.9	0.855	3.31942e-193	CA27_dura_base_skull_13	DOCK1	891	0	1.33333	pos	>1	0.261	pos >1
CA27	0	-1.44727	0.484	0.792	0	CA27_dura_base_skull_13	DOCK4	891	0	1.11111	neg	>1	0.261	neg >1
CA27	2.31202e-144	0.279255	0.533	0.331	3.60606e-140	CA27_dura_base_skull_13	DOCK7	891	0	1.5	pos	>1	0.261	pos >1
CA27	0	0.741607	0.635	0.34	0	CA27_dura_base_skull_13	DOCK8	891	0	1.14286	pos	>1	0.261	pos >1
CA27	1.30095e-107	-0.441365	0.257	0.355	2.0291e-103	CA27_dura_base_skull_13	DOK6	891	0	1.2	neg	>1	0.261	neg >1
CA27	0	0.907889	0.343	0.038	0	CA27_dura_base_skull_13	DPP6	891	0	1.11111	pos	>1	0.261	pos >1
CA27	0	1.09198	0.753	0.289	0	CA27_dura_base_skull_13	DPYSL3	891	0	1.5	pos	>1	0.261	pos >1
CA27	0	0.996751	0.904	0.589	0	CA27_dura_base_skull_13	DRAIC	891	0	1.33333	pos	>1	0.261	pos >1
CA27	0	0.712137	0.556	0.225	0	CA27_dura_base_skull_13	DSCAM-AS1	891	0	1.2	pos	>1	0.261	pos >1
CA27	0	0.461482	0.427	0.147	0	CA27_dura_base_skull_13	DST	891	0	1.33333	pos	>1	0.261	pos >1
CA27	9.64793e-227	0.299848	0.202	0.049	1.50479e-222	CA27_dura_base_skull_13	DTL	891	0	2	pos	>1	0.261	pos >1
CA27	0	0.744492	0.914	0.682	0	CA27_dura_base_skull_13	DTNB	891	0	2	pos	>1	0.261	pos >1
CA27	1.81831e-161	0.391866	0.874	0.803	2.83602e-157	CA27_dura_base_skull_13	DUSP16	891	0	1.2	pos	>1	0.261	pos >1
CA27	1.8754e-91	-0.811788	0.228	0.332	2.92507e-87	CA27_dura_base_skull_13	EBF1	891	0	1.5	neg	>1	0.261	neg >1
CA27	1.52976e-173	0.291689	0.383	0.188	2.38596e-169	CA27_dura_base_skull_13	ECE1	891	0	1.5	pos	>1	0.261	pos >1
CA27	4.4171e-199	0.314651	0.422	0.213	6.88936e-195	CA27_dura_base_skull_13	ECHDC2	891	0	1.5	pos	>1	0.261	pos >1
CA27	1.25429e-63	-0.255978	0.716	0.799	1.95632e-59	CA27_dura_base_skull_13	ECPAS	891	0	1.14286	neg	>1	0.261	neg >1
CA27	6.20842e-152	-0.373988	0.379	0.526	9.68327e-148	CA27_dura_base_skull_13	EDEM3	891	0	1	neg	<1	0.261	neg <1
CA27	2.47167e-279	0.489957	0.551	0.303	3.85506e-275	CA27_dura_base_skull_13	EDRF1	891	0	1.33333	pos	>1	0.261	pos >1
CA27	1.38884e-109	0.25613	0.453	0.284	2.16618e-105	CA27_dura_base_skull_13	EEF2K	891	0	1.33333	pos	>1	0.261	pos >1
CA27	0	0.722981	0.802	0.521	0	CA27_dura_base_skull_13	EEPD1	891	0	1.11111	pos	>1	0.261	pos >1
CA27	1.05623e-231	-0.633281	0.111	0.319	1.6474e-227	CA27_dura_base_skull_13	EFNA5	891	0	1.33333	neg	>1	0.261	neg >1
CA27	1.06992e-105	-0.323651	0.882	0.942	1.66876e-101	CA27_dura_base_skull_13	ELF2	891	0	1.66667	neg	>1	0.261	neg >1
CA27	5.97967e-243	-0.532535	0.193	0.406	9.32649e-239	CA27_dura_base_skull_13	ELK4	891	0	1	neg	<1	0.261	neg <1
CA27	0	-0.625209	0.896	0.977	0	CA27_dura_base_skull_13	ELL2	891	0	1.33333	neg	>1	0.261	neg >1
CA27	0	0.469311	0.386	0.114	0	CA27_dura_base_skull_13	ELOVL2	891	0	1.33333	pos	>1	0.261	pos >1
CA27	1.97869e-86	-0.282443	0.386	0.468	3.08616e-82	CA27_dura_base_skull_13	ELOVL5	891	0	1.33333	neg	>1	0.261	neg >1
CA27	3.54938e-204	0.38976	0.511	0.278	5.53597e-200	CA27_dura_base_skull_13	ELOVL6	891	0	1.66667	pos	>1	0.261	pos >1
CA27	5.57234e-127	0.264204	0.37	0.2	8.69118e-123	CA27_dura_base_skull_13	ELOVL7	891	0	1.5	pos	>1	0.261	pos >1
CA27	1.58711e-123	-0.367383	0.441	0.535	2.47542e-119	CA27_dura_base_skull_13	ELP2	891	0	1.2	neg	>1	0.261	neg >1
CA27	2.67799e-122	0.251084	0.651	0.463	4.17686e-118	CA27_dura_base_skull_13	EMSY	891	0	1.33333	pos	>1	0.261	pos >1
CA27	8.35059e-100	-0.344062	0.525	0.647	1.30244e-95	CA27_dura_base_skull_13	ENAH	891	0	1.33333	neg	>1	0.261	neg >1
CA27	3.58805e-233	0.367692	0.364	0.158	5.59628e-229	CA27_dura_base_skull_13	ENO1	891	0	1.33333	pos	>1	0.261	pos >1
CA27	1.75065e-194	0.284435	0.204	0.064	2.73049e-190	CA27_dura_base_skull_13	EPCAM-DT	891	0	2	pos	>1	0.261	pos >1
CA27	2.27703e-254	-0.772924	0.167	0.395	3.55149e-250	CA27_dura_base_skull_13	EPHA5	891	0	1.66667	neg	>1	0.261	neg >1
CA27	1.36621e-131	0.260743	0.596	0.4	2.13088e-127	CA27_dura_base_skull_13	EPN2	891	0	1.33333	pos	>1	0.261	pos >1
CA27	4.13325e-282	0.442568	0.897	0.73	6.44663e-278	CA27_dura_base_skull_13	ERBIN	891	0	1.5	pos	>1	0.261	pos >1
CA27	9.21983e-247	0.422994	0.691	0.431	1.43802e-242	CA27_dura_base_skull_13	ERGIC1	891	0	1.5	pos	>1	0.261	pos >1
CA27	5.19121e-178	0.319049	0.543	0.32	8.09673e-174	CA27_dura_base_skull_13	ERI3	891	0	1.5	pos	>1	0.261	pos >1
CA27	1.34779e-156	0.286911	0.408	0.221	2.10215e-152	CA27_dura_base_skull_13	ERICH1	891	0	1.5	pos	>1	0.261	pos >1
CA27	0	0.95162	0.59	0.304	0	CA27_dura_base_skull_13	ERO1A	891	0	1.11111	pos	>1	0.261	pos >1
CA27	0	0.510968	0.615	0.288	0	CA27_dura_base_skull_13	ESRP1	891	0	1.5	pos	>1	0.261	pos >1
CA27	8.00735e-156	0.262539	0.491	0.287	1.24891e-151	CA27_dura_base_skull_13	ETNK1	891	0	1.2	pos	>1	0.261	pos >1
CA27	1.34955e-143	0.312252	0.595	0.391	2.1049e-139	CA27_dura_base_skull_13	ETS2	891	0	1.2	pos	>1	0.261	pos >1
CA27	7.43977e-66	-0.277603	0.629	0.609	1.16038e-61	CA27_dura_base_skull_13	ETV6	891	0	1.2	neg	>1	0.261	neg >1
CA27	0	0.523343	0.653	0.339	0	CA27_dura_base_skull_13	EYA2	891	0	1.5	pos	>1	0.261	pos >1
CA27	6.75099e-138	0.447654	0.712	0.528	1.05295e-133	CA27_dura_base_skull_13	EZH2	891	0	1.11111	pos	>1	0.261	pos >1
CA27	3.83974e-136	0.277974	0.987	0.991	5.98884e-132	CA27_dura_base_skull_13	FAF1	891	0	1.5	pos	>1	0.261	pos >1
CA27	0	1.28193	0.769	0.397	0	CA27_dura_base_skull_13	FAM13A	891	0	1.66667	pos	>1	0.261	pos >1
CA27	0	-0.794442	0.022	0.254	0	CA27_dura_base_skull_13	FAM155A	891	0	1.33333	neg	>1	0.261	neg >1
CA27	0	0.794613	0.944	0.819	0	CA27_dura_base_skull_13	FAM160A1	891	0	1.66667	pos	>1	0.261	pos >1
CA27	0	0.845852	0.532	0.211	0	CA27_dura_base_skull_13	FAM162A	891	0	1.33333	pos	>1	0.261	pos >1
CA27	0	0.531699	0.708	0.391	0	CA27_dura_base_skull_13	FAM168A	891	0	1.33333	pos	>1	0.261	pos >1
CA27	1.86641e-176	0.322223	0.953	0.929	2.91103e-172	CA27_dura_base_skull_13	FAM172A	891	0	1.33333	pos	>1	0.261	pos >1
CA27	2.189e-131	0.256528	0.308	0.151	3.41418e-127	CA27_dura_base_skull_13	FAM210A	891	0	1.2	pos	>1	0.261	pos >1
CA27	3.14474e-287	0.407904	0.457	0.202	4.90485e-283	CA27_dura_base_skull_13	FAM219A	891	0	1.14286	pos	>1	0.261	pos >1
CA27	9.77802e-171	0.261257	0.238	0.084	1.52508e-166	CA27_dura_base_skull_13	FANCI	891	0	1.33333	pos	>1	0.261	pos >1
CA27	2.43364e-184	0.403999	0.604	0.382	3.79575e-180	CA27_dura_base_skull_13	FANCL	891	0	1.5	pos	>1	0.261	pos >1
CA27	5.63106e-256	0.524121	0.898	0.758	8.78276e-252	CA27_dura_base_skull_13	FARP1	891	0	1.33333	pos	>1	0.261	pos >1
CA27	1.77325e-124	0.280428	0.737	0.565	2.76574e-120	CA27_dura_base_skull_13	FBXO11	891	0	2	pos	>1	0.261	pos >1
CA27	1.47821e-161	0.31912	0.436	0.241	2.30556e-157	CA27_dura_base_skull_13	FBXO25	891	0	1.5	pos	>1	0.261	pos >1
CA27	1.02466e-150	0.337453	0.743	0.562	1.59816e-146	CA27_dura_base_skull_13	FBXO42	891	0	1.5	pos	>1	0.261	pos >1
CA27	7.65215e-118	0.279347	0.53	0.346	1.19351e-113	CA27_dura_base_skull_13	FCHSD2	891	0	1.33333	pos	>1	0.261	pos >1
CA27	3.08095e-130	0.27402	0.322	0.164	4.80536e-126	CA27_dura_base_skull_13	FEM1C	891	0	1.5	pos	>1	0.261	pos >1
CA27	2.85955e-123	0.26304	0.259	0.122	4.46003e-119	CA27_dura_base_skull_13	FGD6	891	0	1.42857	pos	>1	0.261	pos >1
CA27	0	0.408044	0.318	0.086	0	CA27_dura_base_skull_13	FGFR1	891	0	1.5	pos	>1	0.261	pos >1
CA27	4.18308e-158	0.273641	0.321	0.146	6.52435e-154	CA27_dura_base_skull_13	FGGY	891	0	1.5	pos	>1	0.261	pos >1
CA27	4.00686e-75	0.25415	0.847	0.834	6.2495e-71	CA27_dura_base_skull_13	FKBP5	891	0	1.33333	pos	>1	0.261	pos >1
CA27	0	0.509011	0.509	0.21	0	CA27_dura_base_skull_13	FLG-AS1	891	0	1	pos	<1	0.261	pos <1
CA27	1.21599e-182	0.419585	0.613	0.389	1.89658e-178	CA27_dura_base_skull_13	FLNB	891	0	1.33333	pos	>1	0.261	pos >1
CA27	4.28103e-165	0.294193	0.247	0.093	6.67713e-161	CA27_dura_base_skull_13	FLVCR2	891	0	1.11111	pos	>1	0.261	pos >1
CA27	1.77133e-90	0.268238	0.674	0.521	2.76275e-86	CA27_dura_base_skull_13	FNBP1L	891	0	1.5	pos	>1	0.261	pos >1
CA27	2.21143e-166	0.336733	0.95	0.911	3.44916e-162	CA27_dura_base_skull_13	FNIP1	891	0	1.33333	pos	>1	0.261	pos >1
CA27	3.28065e-153	0.262673	0.629	0.419	5.11683e-149	CA27_dura_base_skull_13	FNIP2	891	0	1.66667	pos	>1	0.261	pos >1
CA27	8.34803e-110	-0.28081	0.241	0.373	1.30204e-105	CA27_dura_base_skull_13	FOXA1	891	0	1.11111	neg	>1	0.261	neg >1
CA27	7.60441e-131	0.290751	0.805	0.663	1.18606e-126	CA27_dura_base_skull_13	FOXJ3	891	0	1.5	pos	>1	0.261	pos >1
CA27	0	1.17736	0.7	0.257	0	CA27_dura_base_skull_13	FRAS1	891	0	1.66667	pos	>1	0.261	pos >1
CA27	4.49881589742218e-312	0.434528	0.281	0.079	7.0168e-308	CA27_dura_base_skull_13	FSIP1	891	0	1.33333	pos	>1	0.261	pos >1
CA27	6.27824e-189	0.312331	0.611	0.376	9.79217e-185	CA27_dura_base_skull_13	FTO	891	0	1.33333	pos	>1	0.261	pos >1
CA27	0	0.360176	0.267	0.055	0	CA27_dura_base_skull_13	FXYD3	891	0	1.33333	pos	>1	0.261	pos >1
CA27	1.07272e-188	0.383691	0.494	0.272	1.67312e-184	CA27_dura_base_skull_13	GALNT10	891	0	1.5	pos	>1	0.261	pos >1
CA27	7.02833e-160	0.437747	0.68	0.468	1.09621e-155	CA27_dura_base_skull_13	GALNT17	891	0	1.11111	pos	>1	0.261	pos >1
CA27	0	0.563653	0.73	0.411	0	CA27_dura_base_skull_13	GALNTL6	891	0	1.66667	pos	>1	0.261	pos >1
CA27	0	0.823548	0.577	0.277	0	CA27_dura_base_skull_13	GBE1	891	0	1.33333	pos	>1	0.261	pos >1
CA27	2.52144e-133	0.259075	0.541	0.348	3.93268e-129	CA27_dura_base_skull_13	GFPT1	891	0	1.5	pos	>1	0.261	pos >1
CA27	8.56446e-109	0.317218	0.457	0.291	1.3358e-104	CA27_dura_base_skull_13	GLCCI1	891	0	1.25	pos	>1	0.261	pos >1
CA27	4.45348e-120	-0.402342	0.67	0.772	6.94609e-116	CA27_dura_base_skull_13	GLYATL1	891	0	1.33333	neg	>1	0.261	neg >1
CA27	3.50988e-209	0.497057	0.961	0.96	5.47437e-205	CA27_dura_base_skull_13	GLYATL2	891	0	1.33333	pos	>1	0.261	pos >1
CA27	0	0.947456	0.98	0.892	0	CA27_dura_base_skull_13	GMDS	891	0	1.33333	pos	>1	0.261	pos >1
CA27	3.46824e-141	0.30473	0.538	0.34	5.40942e-137	CA27_dura_base_skull_13	GMPS	891	0	1.33333	pos	>1	0.261	pos >1
CA27	7.33075e-215	-0.461817	0.117	0.312	1.14338e-210	CA27_dura_base_skull_13	GNAI1	891	0	1.11111	neg	>1	0.261	neg >1
CA27	1.05457763234141e-310	-0.510337	0.904	0.97	1.64482e-306	CA27_dura_base_skull_13	GOLPH3	891	0	1	neg	<1	0.261	neg <1
CA27	0	-1.73541	0.432	0.744	0	CA27_dura_base_skull_13	GPC5	891	0	1.33333	neg	>1	0.261	neg >1
CA27	1.02566e-216	-0.505066	0.271	0.48	1.59972e-212	CA27_dura_base_skull_13	GPC5-AS1	891	0	1.33333	neg	>1	0.261	neg >1
CA27	0	-1.40605	0.983	0.995	0	CA27_dura_base_skull_13	GPC6	891	0	1.33333	neg	>1	0.261	neg >1
CA27	0	0.667802	0.647	0.308	0	CA27_dura_base_skull_13	GPI	891	0	1.33333	pos	>1	0.261	pos >1
CA27	5.29952e-230	-1.05829	0.279	0.488	8.26566e-226	CA27_dura_base_skull_13	GPM6A	891	0	1.66667	neg	>1	0.261	neg >1
CA27	0	0.489786	0.391	0.096	0	CA27_dura_base_skull_13	GPT2	891	0	1.33333	pos	>1	0.261	pos >1
CA27	8.92563e-96	0.277125	0.398	0.245	1.39213e-91	CA27_dura_base_skull_13	GRAMD4	891	0	1.5	pos	>1	0.261	pos >1
CA27	3.67757e-169	0.394771	0.465	0.259	5.73591e-165	CA27_dura_base_skull_13	GREB1	891	0	2	pos	>1	0.261	pos >1
CA27	0	0.72266	0.662	0.268	0	CA27_dura_base_skull_13	GREB1L	891	0	1.2	pos	>1	0.261	pos >1
CA27	0	-0.742155	0.945	0.992	0	CA27_dura_base_skull_13	GRHL2	891	0	1.5	neg	>1	0.261	neg >1
CA27	3.73055e-70	-0.25364	0.143	0.23	5.81853e-66	CA27_dura_base_skull_13	GRID1	891	0	1.25	neg	>1	0.261	neg >1
CA27	0	-1.21128	0.131	0.461	0	CA27_dura_base_skull_13	GRIK2	891	0	1.33333	neg	>1	0.261	neg >1
CA27	0	-1.55667	0.352	0.751	0	CA27_dura_base_skull_13	GRIN3A	891	0	1.14286	neg	>1	0.261	neg >1
CA27	1.11462e-269	0.491976	0.701	0.423	1.73847e-265	CA27_dura_base_skull_13	GRIP1	891	0	1.42857	pos	>1	0.261	pos >1
CA27	3.51331e-278	-0.709815	0.059	0.262	5.47972e-274	CA27_dura_base_skull_13	GRM8	891	0	1.11111	neg	>1	0.261	neg >1
CA27	3.69858e-200	0.3505	0.539	0.305	5.76867e-196	CA27_dura_base_skull_13	GTF2IRD1	891	0	1.11111	pos	>1	0.261	pos >1
CA27	3.22324e-205	0.367772	0.56	0.331	5.02729e-201	CA27_dura_base_skull_13	H2AFY	891	0	1.33333	pos	>1	0.261	pos >1
CA27	2.25277e-128	0.255981	0.354	0.189	3.51365e-124	CA27_dura_base_skull_13	HACD3	891	0	1.33333	pos	>1	0.261	pos >1
CA27	3.77171e-140	0.250163	0.276	0.125	5.88274e-136	CA27_dura_base_skull_13	HADH	891	0	1.66667	pos	>1	0.261	pos >1
CA27	7.5989e-113	0.250912	0.706	0.53	1.1852e-108	CA27_dura_base_skull_13	HDAC8	891	0	1.33333	pos	>1	0.261	pos >1
CA27	4.70944e-172	0.864898	0.357	0.185	7.34532e-168	CA27_dura_base_skull_13	HDAC9	891	0	1.11111	pos	>1	0.261	pos >1
CA27	1.91988e-107	0.683649	0.201	0.11	2.99444e-103	CA27_dura_base_skull_13	HEPACAM2	891	0	1.11111	pos	>1	0.261	pos >1
CA27	8.46163e-148	0.252375	0.513	0.311	1.31976e-143	CA27_dura_base_skull_13	HERC1	891	0	1.33333	pos	>1	0.261	pos >1
CA27	2.47272e-250	0.543205	0.468	0.246	3.8567e-246	CA27_dura_base_skull_13	HERC3	891	0	1.66667	pos	>1	0.261	pos >1
CA27	1.60156e-136	0.442552	0.324	0.189	2.49795e-132	CA27_dura_base_skull_13	HIF1A-AS3	891	0	1.11111	pos	>1	0.261	pos >1
CA27	1.69254e-117	0.33001	0.658	0.478	2.63985e-113	CA27_dura_base_skull_13	HIVEP1	891	0	1.33333	pos	>1	0.261	pos >1
CA27	7.46944e-198	0.356376	0.417	0.201	1.16501e-193	CA27_dura_base_skull_13	HIVEP3	891	0	1.5	pos	>1	0.261	pos >1
CA27	4.64553e-213	0.3073	0.331	0.131	7.24564e-209	CA27_dura_base_skull_13	HK2	891	0	1.5	pos	>1	0.261	pos >1
CA27	5.33487e-171	0.288477	0.669	0.445	8.32079e-167	CA27_dura_base_skull_13	HNRNPM	891	0	1.33333	pos	>1	0.261	pos >1
CA27	3.61544e-157	0.290834	0.337	0.159	5.639e-153	CA27_dura_base_skull_13	HOMER1	891	0	1.5	pos	>1	0.261	pos >1
CA27	0	0.636803	0.411	0.08	0	CA27_dura_base_skull_13	HPCAL1	891	0	2	pos	>1	0.261	pos >1
CA27	2.31163e-36	-0.277105	0.245	0.324	3.60545e-32	CA27_dura_base_skull_13	HS6ST3	891	0	1.33333	neg	>1	0.261	neg >1
CA27	3.67796e-96	0.322885	0.449	0.345	5.73652e-92	CA27_dura_base_skull_13	HSP90AA1	891	0	1.11111	pos	>1	0.261	pos >1
CA27	5.5552e-86	0.252148	0.375	0.232	8.66445e-82	CA27_dura_base_skull_13	HULC	891	0	1.33333	pos	>1	0.261	pos >1
CA27	6.25989e-100	0.319175	0.963	0.917	9.76355e-96	CA27_dura_base_skull_13	IGF1R	891	0	1.33333	pos	>1	0.261	pos >1
CA27	5.54421e-180	0.373648	0.506	0.286	8.64731e-176	CA27_dura_base_skull_13	IL1R1	891	0	1	pos	<1	0.261	pos <1
CA27	0	0.579202	0.705	0.374	0	CA27_dura_base_skull_13	IL1RAPL1	891	0	1.33333	pos	>1	0.261	pos >1
CA27	2.56866e-210	0.382813	0.414	0.201	4.00634e-206	CA27_dura_base_skull_13	IL6R	891	0	1	pos	<1	0.261	pos <1
CA27	0	-0.417575	0.995	0.999	0	CA27_dura_base_skull_13	IMMP2L	891	0	1.11111	neg	>1	0.261	neg >1
CA27	0	-1.22904	0.548	0.8	0	CA27_dura_base_skull_13	INPP4B	891	0	1.66667	neg	>1	0.261	neg >1
CA27	9.14282e-171	0.309937	0.599	0.376	1.42601e-166	CA27_dura_base_skull_13	INPP5A	891	0	1.33333	pos	>1	0.261	pos >1
CA27	0	0.614355	0.746	0.41	0	CA27_dura_base_skull_13	INSR	891	0	1.33333	pos	>1	0.261	pos >1
CA27	9.51605e-154	0.321388	0.744	0.551	1.48422e-149	CA27_dura_base_skull_13	INVS	891	0	1.14286	pos	>1	0.261	pos >1
CA27	9.51666e-77	-0.277505	0.134	0.233	1.48431e-72	CA27_dura_base_skull_13	IQGAP2	891	0	1.5	neg	>1	0.261	neg >1
CA27	2.63406e-52	-0.28133	0.498	0.574	4.10835e-48	CA27_dura_base_skull_13	IRS1	891	0	1	neg	<1	0.261	neg <1
CA27	1.14136e-145	-0.417161	0.73	0.865	1.78018e-141	CA27_dura_base_skull_13	IRS2	891	0	1.33333	neg	>1	0.261	neg >1
CA27	6.88087e-127	0.27807	0.884	0.825	1.07321e-122	CA27_dura_base_skull_13	ITFG1	891	0	1.33333	pos	>1	0.261	pos >1
CA27	2.98895e-143	-0.446159	0.234	0.365	4.66187e-139	CA27_dura_base_skull_13	ITGAV	891	0	1	neg	<1	0.261	neg <1
CA27	0	0.56342	0.638	0.36	0	CA27_dura_base_skull_13	ITGB5	891	0	1.33333	pos	>1	0.261	pos >1
CA27	3.51044e-139	0.290645	0.416	0.237	5.47524e-135	CA27_dura_base_skull_13	ITPK1	891	0	1.11111	pos	>1	0.261	pos >1
CA27	2.79315e-135	0.303846	0.432	0.248	4.35647e-131	CA27_dura_base_skull_13	JARID2	891	0	1.33333	pos	>1	0.261	pos >1
CA27	2.6725e-103	0.29673	0.297	0.158	4.16829e-99	CA27_dura_base_skull_13	JAZF1	891	0	1.11111	pos	>1	0.261	pos >1
CA27	1.02477e-275	0.428889	0.988	0.971	1.59833e-271	CA27_dura_base_skull_13	JMJD1C	891	0	1.33333	pos	>1	0.261	pos >1
CA27	1.3301e-136	0.324866	0.554	0.359	2.07456e-132	CA27_dura_base_skull_13	JMY	891	0	1.5	pos	>1	0.261	pos >1
CA27	7.08999e-67	-0.28759	0.449	0.504	1.10583e-62	CA27_dura_base_skull_13	JPH1	891	0	1.5	neg	>1	0.261	neg >1
CA27	2.15308e-169	0.479789	0.658	0.455	3.35817e-165	CA27_dura_base_skull_13	KALRN	891	0	1.33333	pos	>1	0.261	pos >1
CA27	2.32277e-135	-0.457715	0.595	0.74	3.62282e-131	CA27_dura_base_skull_13	KANK1	891	0	1.14286	neg	>1	0.261	neg >1
CA27	0	-1.05092	0.201	0.585	0	CA27_dura_base_skull_13	KANSL1L	891	0	1	neg	<1	0.261	neg <1
CA27	0	1.27951	0.901	0.423	0	CA27_dura_base_skull_13	KAZN	891	0	1.5	pos	>1	0.261	pos >1
CA27	2.2537e-221	0.308413	0.172	0.034	3.51509e-217	CA27_dura_base_skull_13	KCNJ3	891	0	1	pos	<1	0.261	pos <1
CA27	2.79016e-140	0.595484	0.115	0.029	4.35181e-136	CA27_dura_base_skull_13	KCNJ6	891	0	1.2	pos	>1	0.261	pos >1
CA27	2.4566e-162	-0.637864	0.193	0.375	3.83155e-158	CA27_dura_base_skull_13	KCNMA1	891	0	1.33333	neg	>1	0.261	neg >1
CA27	2.56068e-44	-0.278501	0.239	0.294	3.99389e-40	CA27_dura_base_skull_13	KCTD16	891	0	1.5	neg	>1	0.261	neg >1
CA27	2.70255e-175	0.329523	0.39	0.196	4.21517e-171	CA27_dura_base_skull_13	KCTD3	891	0	2	pos	>1	0.261	pos >1
CA27	9.80631e-100	-0.259457	0.038	0.134	1.52949e-95	CA27_dura_base_skull_13	KCTD8	891	0	1.25	neg	>1	0.261	neg >1
CA27	6.89358e-94	0.254543	0.716	0.568	1.07519e-89	CA27_dura_base_skull_13	KDM2A	891	0	1.33333	pos	>1	0.261	pos >1
CA27	4.9252e-154	0.328149	0.66	0.454	7.68184e-150	CA27_dura_base_skull_13	KDM4B	891	0	1.33333	pos	>1	0.261	pos >1
CA27	3.68825e-127	0.314725	0.872	0.805	5.75257e-123	CA27_dura_base_skull_13	KDM4C	891	0	1.14286	pos	>1	0.261	pos >1
CA27	0	0.680446	0.39	0.056	0	CA27_dura_base_skull_13	KIAA0319	891	0	1.33333	pos	>1	0.261	pos >1
CA27	1.44124e-183	0.391212	0.338	0.155	2.2479e-179	CA27_dura_base_skull_13	KIAA1211	891	0	1.42857	pos	>1	0.261	pos >1
CA27	6.50526e-104	-0.295009	0.444	0.4	1.01463e-99	CA27_dura_base_skull_13	KIAA1217	891	0	1.33333	neg	>1	0.261	neg >1
CA27	1.32646e-161	0.331449	0.505	0.294	2.06887e-157	CA27_dura_base_skull_13	KIAA1324	891	0	1.5	pos	>1	0.261	pos >1
CA27	4.81735e-194	0.314059	0.42	0.206	7.51362e-190	CA27_dura_base_skull_13	KIAA1671	891	0	1.5	pos	>1	0.261	pos >1
CA27	4.45959e-64	-0.297161	0.675	0.754	6.95563e-60	CA27_dura_base_skull_13	KIAA1958	891	0	1.14286	neg	>1	0.261	neg >1
CA27	5.85461e-208	0.381762	0.718	0.477	9.13144e-204	CA27_dura_base_skull_13	KIF16B	891	0	1.5	pos	>1	0.261	pos >1
CA27	5.84732e-141	0.268562	0.592	0.389	9.12007e-137	CA27_dura_base_skull_13	KIF2A	891	0	1.5	pos	>1	0.261	pos >1
CA27	1.12181e-218	0.410985	0.502	0.269	1.74969e-214	CA27_dura_base_skull_13	KLF3	891	0	1.25	pos	>1	0.261	pos >1
CA27	7.02764e-172	0.318081	0.465	0.255	1.0961e-167	CA27_dura_base_skull_13	KLHL22	891	0	1.5	pos	>1	0.261	pos >1
CA27	2.77673e-152	-0.310139	0.988	0.996	4.33086e-148	CA27_dura_base_skull_13	KMT2C	891	0	1.11111	neg	>1	0.261	neg >1
CA27	3.84746e-148	0.270293	0.351	0.174	6.00088e-144	CA27_dura_base_skull_13	KNTC1	891	0	1.25	pos	>1	0.261	pos >1
CA27	1.51378e-246	0.408663	0.445	0.202	2.36105e-242	CA27_dura_base_skull_13	KRT19	891	0	1.33333	pos	>1	0.261	pos >1
CA27	0	1.02229	0.704	0.278	0	CA27_dura_base_skull_13	KSR2	891	0	1.25	pos	>1	0.261	pos >1
CA27	0	1.07118	0.799	0.456	0	CA27_dura_base_skull_13	LARGE1	891	0	1.5	pos	>1	0.261	pos >1
CA27	6.05639e-168	0.333069	0.549	0.332	9.44615e-164	CA27_dura_base_skull_13	LARP1B	891	0	1.66667	pos	>1	0.261	pos >1
CA27	0	0.561709	0.686	0.374	0	CA27_dura_base_skull_13	LCLAT1	891	0	2	pos	>1	0.261	pos >1
CA27	2.16539e-120	0.281823	0.896	0.826	3.37736e-116	CA27_dura_base_skull_13	LCOR	891	0	1.33333	pos	>1	0.261	pos >1
CA27	4.15941e-282	0.566687	0.29	0.082	6.48743e-278	CA27_dura_base_skull_13	LDLRAD4	891	0	1.2	pos	>1	0.261	pos >1
CA27	4.13879e-124	0.290877	0.326	0.168	6.45528e-120	CA27_dura_base_skull_13	LEF1	891	0	1.66667	pos	>1	0.261	pos >1
CA27	7.28011e-224	0.277215	0.23	0.065	1.13548e-219	CA27_dura_base_skull_13	LHFPL2	891	0	1.5	pos	>1	0.261	pos >1
CA27	1.9527e-142	0.337978	0.252	0.103	3.04562e-138	CA27_dura_base_skull_13	LHFPL6	891	0	1.33333	pos	>1	0.261	pos >1
CA27	0	0.557832	0.491	0.184	0	CA27_dura_base_skull_13	LIMA1	891	0	1.42857	pos	>1	0.261	pos >1
CA27	2.97454e-240	0.373087	0.548	0.291	4.63939e-236	CA27_dura_base_skull_13	LIMD1	891	0	1.33333	pos	>1	0.261	pos >1
CA27	9.60827e-174	0.381838	0.247	0.092	1.4986e-169	CA27_dura_base_skull_13	LINC00511	891	0	1.33333	pos	>1	0.261	pos >1
CA27	1.05128e-96	-0.262581	0.254	0.3	1.63968e-92	CA27_dura_base_skull_13	LINC01087	891	0	1	neg	<1	0.261	neg <1
CA27	1.78352e-239	-0.54518	0.451	0.628	2.78175e-235	CA27_dura_base_skull_13	LINC01138	891	0	1	neg	<1	0.261	neg <1
CA27	2.43153e-193	-0.603473	0.254	0.451	3.79246e-189	CA27_dura_base_skull_13	LINC01297	891	0	1.11111	neg	>1	0.261	neg >1
CA27	1.36495e-116	0.252379	0.344	0.185	2.12891e-112	CA27_dura_base_skull_13	LINC01376	891	0	2	pos	>1	0.261	pos >1
CA27	0	0.455326	0.438	0.143	0	CA27_dura_base_skull_13	LINC01446	891	0	1.11111	pos	>1	0.261	pos >1
CA27	0	0.394405	0.299	0.067	0	CA27_dura_base_skull_13	LINC01605	891	0	1.5	pos	>1	0.261	pos >1
CA27	1.28027e-234	0.685722	0.765	0.574	1.99684e-230	CA27_dura_base_skull_13	LINC01619	891	0	1.42857	pos	>1	0.261	pos >1
CA27	1.80538e-149	-0.389982	0.103	0.239	2.81585e-145	CA27_dura_base_skull_13	LINC01687	891	0	1.2	neg	>1	0.261	neg >1
CA27	3.35242e-197	-0.317243	0.014	0.142	5.22877e-193	CA27_dura_base_skull_13	LINC01723	891	0	1.5	neg	>1	0.261	neg >1
CA27	8.88894e-123	-0.416827	0.677	0.807	1.38641e-118	CA27_dura_base_skull_13	LINC01725	891	0	1.5	neg	>1	0.261	neg >1
CA27	2.55191e-176	-0.338491	0.068	0.223	3.98021e-172	CA27_dura_base_skull_13	LINC01790	891	0	1	neg	<1	0.261	neg <1
CA27	7.23958e-242	-0.482913	0.063	0.253	1.12916e-237	CA27_dura_base_skull_13	LINC01821	891	0	1	neg	<1	0.261	neg <1
CA27	8.91072e-160	-0.436846	0.03	0.154	1.38981e-155	CA27_dura_base_skull_13	LINC02147	891	0	1.5	neg	>1	0.261	neg >1
CA27	0	-1.95109	0.023	0.641	0	CA27_dura_base_skull_13	LINC02163	891	0	1.33333	neg	>1	0.261	neg >1
CA27	9.43968e-138	-0.273992	0.032	0.146	1.47231e-133	CA27_dura_base_skull_13	LINC02223	891	0	1.6	neg	>1	0.261	neg >1
CA27	0	-0.710212	0.019	0.306	0	CA27_dura_base_skull_13	LINC02315	891	0	1.11111	neg	>1	0.261	neg >1
CA27	4.65351e-188	-0.586529	0.251	0.438	7.25808e-184	CA27_dura_base_skull_13	LINC02343	891	0	1.33333	neg	>1	0.261	neg >1
CA27	0	0.540372	0.564	0.269	0	CA27_dura_base_skull_13	LINC02615	891	0	1.66667	pos	>1	0.261	pos >1
CA27	0	0.887246	0.348	0.058	0	CA27_dura_base_skull_13	LMNTD1	891	0	1.2	pos	>1	0.261	pos >1
CA27	2.97751e-155	0.319972	0.438	0.24	4.64402e-151	CA27_dura_base_skull_13	LMO7	891	0	1.33333	pos	>1	0.261	pos >1
CA27	4.06102e-146	0.357016	0.422	0.237	6.33397e-142	CA27_dura_base_skull_13	LPIN2	891	0	1.2	pos	>1	0.261	pos >1
CA27	5.71666e-187	0.335664	0.994	0.987	8.91628e-183	CA27_dura_base_skull_13	LRBA	891	0	1.66667	pos	>1	0.261	pos >1
CA27	6.61021e-166	0.325932	0.639	0.419	1.03099e-161	CA27_dura_base_skull_13	LRIG1	891	0	1.33333	pos	>1	0.261	pos >1
CA27	4.76937e-66	0.263527	0.856	0.836	7.43878e-62	CA27_dura_base_skull_13	LRMDA	891	0	1.33333	pos	>1	0.261	pos >1
CA27	3.9425e-182	0.312092	0.587	0.357	6.14912e-178	CA27_dura_base_skull_13	LRPPRC	891	0	1.5	pos	>1	0.261	pos >1
CA27	1.90178e-157	0.335685	0.503	0.295	2.96621e-153	CA27_dura_base_skull_13	LRRC8D	891	0	1.5	pos	>1	0.261	pos >1
CA27	0	-0.999026	0.242	0.567	0	CA27_dura_base_skull_13	LRRC9	891	0	1.11111	neg	>1	0.261	neg >1
CA27	0	1.19973	0.71	0.392	0	CA27_dura_base_skull_13	LRRIQ1	891	0	1.42857	pos	>1	0.261	pos >1
CA27	0	-0.757606	0.08	0.33	0	CA27_dura_base_skull_13	LRRN1	891	0	1.33333	neg	>1	0.261	neg >1
CA27	1.03739e-259	0.260478	0.565	0.31	1.61802e-255	CA27_dura_base_skull_13	LRRTM4	891	0	1.5	pos	>1	0.261	pos >1
CA27	0	-1.05688	0.472	0.702	0	CA27_dura_base_skull_13	LSAMP	891	0	1.33333	neg	>1	0.261	neg >1
CA27	0	0.562562	0.481	0.197	0	CA27_dura_base_skull_13	LTBP1	891	0	1.5	pos	>1	0.261	pos >1
CA27	5.94827e-219	0.44138	0.699	0.455	9.27752e-215	CA27_dura_base_skull_13	LYN	891	0	1.5	pos	>1	0.261	pos >1
CA27	2.62709e-174	0.315433	0.74	0.521	4.09747e-170	CA27_dura_base_skull_13	MACF1	891	0	1.5	pos	>1	0.261	pos >1
CA27	1.58591e-143	0.30367	0.569	0.368	2.47355e-139	CA27_dura_base_skull_13	MAD1L1	891	0	1.25	pos	>1	0.261	pos >1
CA27	4.58022e-275	-0.67277	0.124	0.342	7.14377e-271	CA27_dura_base_skull_13	MAGI2	891	0	1.11111	neg	>1	0.261	neg >1
CA27	6.51496e-131	0.256732	0.71	0.517	1.01614e-126	CA27_dura_base_skull_13	MAGI3	891	0	1.5	pos	>1	0.261	pos >1
CA27	3.78123e-121	0.341244	0.419	0.249	5.89759e-117	CA27_dura_base_skull_13	MALT1	891	0	1.2	pos	>1	0.261	pos >1
CA27	2.50107e-262	-0.783612	0.093	0.28	3.90092e-258	CA27_dura_base_skull_13	MAML2	891	0	1.33333	neg	>1	0.261	neg >1
CA27	5.75949e-141	0.279837	0.359	0.184	8.98308e-137	CA27_dura_base_skull_13	MAN1C1	891	0	1.5	pos	>1	0.261	pos >1
CA27	0	0.56823	0.655	0.355	0	CA27_dura_base_skull_13	MAN2A1	891	0	1.33333	pos	>1	0.261	pos >1
CA27	2.79455e-190	-0.704609	0.285	0.399	4.35866e-186	CA27_dura_base_skull_13	MAP2	891	0	1	neg	<1	0.261	neg <1
CA27	3.90253e-172	0.294183	0.392	0.195	6.08678e-168	CA27_dura_base_skull_13	MAP2K1	891	0	1.33333	pos	>1	0.261	pos >1
CA27	9.94027e-149	0.298423	0.726	0.527	1.55038e-144	CA27_dura_base_skull_13	MAP2K5	891	0	1.33333	pos	>1	0.261	pos >1
CA27	5.58917e-95	-0.369916	0.895	0.95	8.71743e-91	CA27_dura_base_skull_13	MAP3K5	891	0	1.33333	neg	>1	0.261	neg >1
CA27	2.21308e-199	0.390014	0.626	0.39	3.45174e-195	CA27_dura_base_skull_13	MAP4	891	0	1.33333	pos	>1	0.261	pos >1
CA27	1.72133e-176	0.392772	0.778	0.608	2.68476e-172	CA27_dura_base_skull_13	MAP4K3	891	0	1.5	pos	>1	0.261	pos >1
CA27	4.63369e-138	0.261812	0.332	0.164	7.22716e-134	CA27_dura_base_skull_13	MAP4K3-DT	891	0	1.5	pos	>1	0.261	pos >1
CA27	9.45493e-85	-0.303683	0.423	0.525	1.47469e-80	CA27_dura_base_skull_13	MAP4K4	891	0	1	neg	<1	0.261	neg <1
CA27	5.67676e-201	0.337986	0.469	0.25	8.85404e-197	CA27_dura_base_skull_13	MAPK9	891	0	1.25	pos	>1	0.261	pos >1
CA27	0	0.698684	0.764	0.433	0	CA27_dura_base_skull_13	MAST2	891	0	1.5	pos	>1	0.261	pos >1
CA27	8.62866e-271	0.472057	0.568	0.293	1.34581e-266	CA27_dura_base_skull_13	MAST4	891	0	1.5	pos	>1	0.261	pos >1
CA27	5.09141e-76	-0.302472	0.472	0.558	7.94108e-72	CA27_dura_base_skull_13	MBD5	891	0	1	neg	<1	0.261	neg <1
CA27	0	0.453241	0.386	0.115	0	CA27_dura_base_skull_13	MBOAT1	891	0	1.33333	pos	>1	0.261	pos >1
CA27	3.5176e-59	-0.335275	0.672	0.697	5.48641e-55	CA27_dura_base_skull_13	MBOAT2	891	0	2	neg	>1	0.261	neg >1
CA27	0	0.694401	0.908	0.757	0	CA27_dura_base_skull_13	MCCC2	891	0	1.5	pos	>1	0.261	pos >1
CA27	1.87457e-184	0.349745	0.338	0.148	2.92377e-180	CA27_dura_base_skull_13	MED12L	891	0	1.33333	pos	>1	0.261	pos >1
CA27	4.65995e-81	-0.355036	0.339	0.434	7.26812e-77	CA27_dura_base_skull_13	METTL8	891	0	1	neg	<1	0.261	neg <1
CA27	2.22283e-216	-0.291469	0.024	0.176	3.46695e-212	CA27_dura_base_skull_13	MFSD4A	891	0	1	neg	<1	0.261	neg <1
CA27	1.55748e-298	0.370879	0.336	0.106	2.4292e-294	CA27_dura_base_skull_13	MGAT4A	891	0	2	pos	>1	0.261	pos >1
CA27	0	0.748925	0.665	0.26	0	CA27_dura_base_skull_13	MICAL3	891	0	1.5	pos	>1	0.261	pos >1
CA27	0	1.13813	0.859	0.464	0	CA27_dura_base_skull_13	MIPEP	891	0	1.33333	pos	>1	0.261	pos >1
CA27	6.47021e-185	-0.253729	0.006	0.118	1.00916e-180	CA27_dura_base_skull_13	MIR181A1HG	891	0	1	neg	<1	0.261	neg <1
CA27	1.0597e-173	0.368092	0.484	0.27	1.65282e-169	CA27_dura_base_skull_13	MIR646HG	891	0	1.5	pos	>1	0.261	pos >1
CA27	1.14294e-97	0.251423	0.386	0.235	1.78265e-93	CA27_dura_base_skull_13	MIR924HG	891	0	1.2	pos	>1	0.261	pos >1
CA27	0	1.4531	0.961	0.692	0	CA27_dura_base_skull_13	MIR99AHG	891	0	1.2	pos	>1	0.261	pos >1
CA27	2.16341e-71	-0.269385	0.953	0.97	3.37426e-67	CA27_dura_base_skull_13	MKLN1	891	0	1.11111	neg	>1	0.261	neg >1
CA27	9.59459e-124	0.262647	0.574	0.384	1.49647e-119	CA27_dura_base_skull_13	MLLT10	891	0	1.33333	pos	>1	0.261	pos >1
CA27	1.07128e-189	0.420552	0.716	0.491	1.67087e-185	CA27_dura_base_skull_13	MLLT3	891	0	1.14286	pos	>1	0.261	pos >1
CA27	0	1.61664	0.864	0.348	0	CA27_dura_base_skull_13	MMP26	891	0	1.33333	pos	>1	0.261	pos >1
CA27	5.7869e-159	0.281664	0.571	0.357	9.02583e-155	CA27_dura_base_skull_13	MRTFA	891	0	1.5	pos	>1	0.261	pos >1
CA27	0	0.610958	0.547	0.207	0	CA27_dura_base_skull_13	MSH2	891	0	2	pos	>1	0.261	pos >1
CA27	1.043e-79	0.287666	0.249	0.137	1.62676e-75	CA27_dura_base_skull_13	MSMB	891	0	1.33333	pos	>1	0.261	pos >1
CA27	2.4576e-164	0.320661	0.61	0.391	3.83312e-160	CA27_dura_base_skull_13	MT-CO2	NA	NA	NA	NA	NA	NA	NA
CA27	8.05354e-162	0.31669	0.54	0.327	1.25611e-157	CA27_dura_base_skull_13	MTA3	891	0	1.5	pos	>1	0.261	pos >1
CA27	2.50197e-71	0.260482	0.294	0.19	3.90232e-67	CA27_dura_base_skull_13	MTSS1	891	0	1.5	pos	>1	0.261	pos >1
CA27	5.68859e-195	0.344151	0.318	0.132	8.87249e-191	CA27_dura_base_skull_13	MXI1	891	0	1.33333	pos	>1	0.261	pos >1
CA27	4.90087e-177	0.306671	0.571	0.345	7.64388e-173	CA27_dura_base_skull_13	MYH10	891	0	1.33333	pos	>1	0.261	pos >1
CA27	4.62675e-282	0.38829	0.418	0.176	7.21634e-278	CA27_dura_base_skull_13	MYH9	891	0	1.5	pos	>1	0.261	pos >1
CA27	1.8517e-299	0.421995	0.392	0.143	2.88809e-295	CA27_dura_base_skull_13	MYO1E	891	0	1.33333	pos	>1	0.261	pos >1
CA27	1.36928e-113	0.307676	0.479	0.304	2.13567e-109	CA27_dura_base_skull_13	MYO5B	891	0	1.2	pos	>1	0.261	pos >1
CA27	0	1.49201	0.949	0.864	0	CA27_dura_base_skull_13	NAALADL2	891	0	1.33333	pos	>1	0.261	pos >1
CA27	4.48116e-169	-0.788481	0.843	0.892	6.98926e-165	CA27_dura_base_skull_13	NAMPT	891	0	1.11111	neg	>1	0.261	neg >1
CA27	1.00161e-241	0.392744	0.895	0.814	1.56221e-237	CA27_dura_base_skull_13	NAP1L1	891	0	1.42857	pos	>1	0.261	pos >1
CA27	0	0.414652	0.852	0.537	0	CA27_dura_base_skull_13	NAV1	891	0	1	pos	<1	0.261	pos <1
CA27	3.40501e-151	-0.534018	0.086	0.224	5.3108e-147	CA27_dura_base_skull_13	NAV3	891	0	1.42857	neg	>1	0.261	neg >1
CA27	5.48738e-223	0.402549	0.735	0.504	8.55866e-219	CA27_dura_base_skull_13	NBAS	891	0	2	pos	>1	0.261	pos >1
CA27	0	-0.630361	0.818	0.959	0	CA27_dura_base_skull_13	NBEA	891	0	1.33333	neg	>1	0.261	neg >1
CA27	1.86006e-81	-0.471168	0.532	0.454	2.90114e-77	CA27_dura_base_skull_13	NCAM2	891	0	1.2	neg	>1	0.261	neg >1
CA27	0	0.562046	0.762	0.442	0	CA27_dura_base_skull_13	NCOA1	891	0	2	pos	>1	0.261	pos >1
CA27	0	0.586371	0.46	0.142	0	CA27_dura_base_skull_13	NCOA7	891	0	1.33333	pos	>1	0.261	pos >1
CA27	9.06775e-138	0.271305	0.518	0.323	1.4143e-133	CA27_dura_base_skull_13	NCOR2	891	0	1.25	pos	>1	0.261	pos >1
CA27	0	0.968666	0.666	0.314	0	CA27_dura_base_skull_13	NDRG1	891	0	1.5	pos	>1	0.261	pos >1
CA27	2.34743e-217	0.32346	0.325	0.132	3.66128e-213	CA27_dura_base_skull_13	NEAT1	891	0	1.33333	pos	>1	0.261	pos >1
CA27	0	0.675321	0.484	0.167	0	CA27_dura_base_skull_13	NEBL	891	0	1.33333	pos	>1	0.261	pos >1
CA27	4.7151e-134	0.369505	0.56	0.37	7.35414e-130	CA27_dura_base_skull_13	NEDD9	891	0	1.33333	pos	>1	0.261	pos >1
CA27	1.73473e-107	-0.298322	0.882	0.947	2.70566e-103	CA27_dura_base_skull_13	NEK7	891	0	1	neg	<1	0.261	neg <1
CA27	9.93706e-170	-0.476949	0.104	0.268	1.54988e-165	CA27_dura_base_skull_13	NETO1	891	0	1.2	neg	>1	0.261	neg >1
CA27	1.31665e-155	0.325056	0.457	0.256	2.05358e-151	CA27_dura_base_skull_13	NETO2	891	0	1.33333	pos	>1	0.261	pos >1
CA27	7.22972e-278	0.314833	0.247	0.061	1.12762e-273	CA27_dura_base_skull_13	NEURL1	891	0	1.33333	pos	>1	0.261	pos >1
CA27	1.85915e-304	0.266167	0.177	0.023	2.89972e-300	CA27_dura_base_skull_13	NEXMIF	891	0	1.33333	pos	>1	0.261	pos >1
CA27	0	0.67375	0.551	0.188	0	CA27_dura_base_skull_13	NHSL1	891	0	1.33333	pos	>1	0.261	pos >1
CA27	1.04258e-141	0.329223	0.462	0.269	1.62611e-137	CA27_dura_base_skull_13	NIBAN1	891	0	1	pos	<1	0.261	pos <1
CA27	0	-0.465252	0.953	0.992	0	CA27_dura_base_skull_13	NIPBL	891	0	1	neg	<1	0.261	neg <1
CA27	3.2597e-94	-0.457872	0.51	0.634	5.08416e-90	CA27_dura_base_skull_13	NLGN1	891	0	1.33333	neg	>1	0.261	neg >1
CA27	2.53203e-251	-0.396747	0.005	0.147	3.94921e-247	CA27_dura_base_skull_13	NLGN4X	891	0	1.33333	neg	>1	0.261	neg >1
CA27	6.85735e-177	0.334243	0.312	0.133	1.06954e-172	CA27_dura_base_skull_13	NNMT	891	0	1.33333	pos	>1	0.261	pos >1
CA27	8.12255e-180	0.288088	0.537	0.312	1.26687e-175	CA27_dura_base_skull_13	NOL10	891	0	2	pos	>1	0.261	pos >1
CA27	4.88752e-122	0.344761	0.868	0.768	7.62306e-118	CA27_dura_base_skull_13	NOS1AP	891	0	1	pos	<1	0.261	pos <1
CA27	1.06616e-224	-0.586109	0.349	0.536	1.6629e-220	CA27_dura_base_skull_13	NOTCH2NLC	891	0	1	neg	<1	0.261	neg <1
CA27	0	0.591461	0.454	0.123	0	CA27_dura_base_skull_13	NPAS2	891	0	3	pos	>1	0.261	pos >1
CA27	0	0.741511	0.56	0.186	0	CA27_dura_base_skull_13	NPNT	891	0	1.66667	pos	>1	0.261	pos >1
CA27	4.66385e-210	0.405882	0.566	0.322	7.2742e-206	CA27_dura_base_skull_13	NR3C1	891	0	1.33333	pos	>1	0.261	pos >1
CA27	1.06186e-77	-0.319116	0.504	0.525	1.65618e-73	CA27_dura_base_skull_13	NR3C2	891	0	1.66667	neg	>1	0.261	neg >1
CA27	0	-1.5591	0.012	0.472	0	CA27_dura_base_skull_13	NRG3	891	0	1.33333	neg	>1	0.261	neg >1
CA27	5.67495e-108	-0.624964	0.289	0.409	8.85122e-104	CA27_dura_base_skull_13	NRXN3	891	0	1.11111	neg	>1	0.261	neg >1
CA27	6.51847e-211	0.450698	0.335	0.147	1.01669e-206	CA27_dura_base_skull_13	NT5DC3	891	0	1.42857	pos	>1	0.261	pos >1
CA27	7.67354e-113	0.276447	0.386	0.226	1.19684e-108	CA27_dura_base_skull_13	NUCB2	891	0	1.33333	pos	>1	0.261	pos >1
CA27	2.41504e-126	0.279624	0.465	0.285	3.76673e-122	CA27_dura_base_skull_13	NUP210	891	0	1.33333	pos	>1	0.261	pos >1
CA27	1.46039e-169	0.337644	0.514	0.3	2.27776e-165	CA27_dura_base_skull_13	NXN	891	0	1.33333	pos	>1	0.261	pos >1
CA27	2.01112e-158	-0.485322	0.27	0.432	3.13674e-154	CA27_dura_base_skull_13	OCRL	891	0	1.33333	neg	>1	0.261	neg >1
CA27	2.93599e-289	0.416321	0.309	0.119	4.57926e-285	CA27_dura_base_skull_13	ODC1	891	0	2	pos	>1	0.261	pos >1
CA27	0	0.5916	0.478	0.153	0	CA27_dura_base_skull_13	OR51E2	891	0	1.33333	pos	>1	0.261	pos >1
CA27	0	0.274009	0.172	0.005	0	CA27_dura_base_skull_13	OSTN-AS1	891	0	1.33333	pos	>1	0.261	pos >1
CA27	0	1.07115	0.526	0.124	0	CA27_dura_base_skull_13	P3H2	891	0	1.33333	pos	>1	0.261	pos >1
CA27	0	1.08567	0.939	0.748	0	CA27_dura_base_skull_13	P4HA1	891	0	1.33333	pos	>1	0.261	pos >1
CA27	3.45308e-134	0.299891	0.894	0.855	5.38577e-130	CA27_dura_base_skull_13	PACS1	891	0	1.33333	pos	>1	0.261	pos >1
CA27	0	0.540323	0.61	0.304	0	CA27_dura_base_skull_13	PACSIN2	891	0	1.5	pos	>1	0.261	pos >1
CA27	1.53951e-211	0.465154	0.344	0.161	2.40117e-207	CA27_dura_base_skull_13	PAG1	891	0	1.5	pos	>1	0.261	pos >1
CA27	2.99837e-185	0.351933	0.938	0.892	4.67656e-181	CA27_dura_base_skull_13	PARD3	891	0	1.33333	pos	>1	0.261	pos >1
CA27	1.29745e-140	-0.517208	0.855	0.907	2.02363e-136	CA27_dura_base_skull_13	PARD3B	891	0	1	neg	<1	0.261	neg <1
CA27	4.07022e-249	-0.641004	0.632	0.798	6.34833e-245	CA27_dura_base_skull_13	PARP8	891	0	1.09091	neg	>1	0.261	neg >1
CA27	0	1.61594	0.837	0.309	0	CA27_dura_base_skull_13	PCA3	891	0	1.14286	pos	>1	0.261	pos >1
CA27	0	0.453612	0.586	0.282	0	CA27_dura_base_skull_13	PCAT14	891	0	1.5	pos	>1	0.261	pos >1
CA27	0	1.16688	0.776	0.284	0	CA27_dura_base_skull_13	PCAT4	891	0	1.66667	pos	>1	0.261	pos >1
CA27	0	0.679029	0.381	0.116	0	CA27_dura_base_skull_13	PCED1B	891	0	1.42857	pos	>1	0.261	pos >1
CA27	6.44142e-189	0.348883	0.515	0.289	1.00467e-184	CA27_dura_base_skull_13	PCGF5	891	0	1.33333	pos	>1	0.261	pos >1
CA27	1.48774e-176	-0.589634	0.702	0.823	2.32043e-172	CA27_dura_base_skull_13	PCLO	891	0	1.11111	neg	>1	0.261	neg >1
CA27	1.53937e-149	-0.373495	0.443	0.598	2.40096e-145	CA27_dura_base_skull_13	PCNX4	891	0	1.11111	neg	>1	0.261	neg >1
CA27	1.67753e-146	0.386541	0.163	0.046	2.61645e-142	CA27_dura_base_skull_13	PDE3A	891	0	1.2	pos	>1	0.261	pos >1
CA27	0	0.877733	0.991	0.996	0	CA27_dura_base_skull_13	PDE4D	891	0	1.5	pos	>1	0.261	pos >1
CA27	2.97914e-271	0.487374	0.709	0.45	4.64656e-267	CA27_dura_base_skull_13	PDE7A	891	0	1.5	pos	>1	0.261	pos >1
CA27	0	0.619509	0.747	0.419	0	CA27_dura_base_skull_13	PDE8A	891	0	1.33333	pos	>1	0.261	pos >1
CA27	5.90439e-147	0.335448	0.578	0.374	9.20907e-143	CA27_dura_base_skull_13	PDE9A	891	0	1.2	pos	>1	0.261	pos >1
CA27	5.08198e-130	-0.394578	0.112	0.241	7.92636e-126	CA27_dura_base_skull_13	PDGFC	891	0	1.66667	neg	>1	0.261	neg >1
CA27	9.7492e-156	0.278773	0.393	0.203	1.52058e-151	CA27_dura_base_skull_13	PDK1	891	0	1	pos	<1	0.261	pos <1
CA27	0	0.552745	0.39	0.089	0	CA27_dura_base_skull_13	PDK3	891	0	1.33333	pos	>1	0.261	pos >1
CA27	0	1.54679	0.62	0.068	0	CA27_dura_base_skull_13	PDK4	891	0	1.11111	pos	>1	0.261	pos >1
CA27	1.4669e-75	-0.261378	0.944	0.974	2.28793e-71	CA27_dura_base_skull_13	PDLIM5	891	0	1.66667	neg	>1	0.261	neg >1
CA27	4.94166e-112	-0.383649	0.959	0.983	7.7075e-108	CA27_dura_base_skull_13	PDS5B	891	0	1.33333	neg	>1	0.261	neg >1
CA27	4.13613e-62	-0.285128	0.239	0.348	6.45112e-58	CA27_dura_base_skull_13	PDZD2	891	0	1	neg	<1	0.261	neg <1
CA27	0	0.913241	0.86	0.579	0	CA27_dura_base_skull_13	PDZRN3	891	0	1.33333	pos	>1	0.261	pos >1
CA27	0	0.895406	0.42	0.06	0	CA27_dura_base_skull_13	PFKFB4	891	0	1.33333	pos	>1	0.261	pos >1
CA27	0	0.894747	0.605	0.215	0	CA27_dura_base_skull_13	PGK1	891	0	1.33333	pos	>1	0.261	pos >1
CA27	1.83535e-285	0.511279	0.801	0.531	2.8626e-281	CA27_dura_base_skull_13	PHACTR2	891	0	1.33333	pos	>1	0.261	pos >1
CA27	1.49699e-258	-0.51588	0.853	0.946	2.33485e-254	CA27_dura_base_skull_13	PHF14	891	0	1.11111	neg	>1	0.261	neg >1
CA27	3.75076e-120	0.258152	0.676	0.491	5.85006e-116	CA27_dura_base_skull_13	PHF3	891	0	1.33333	pos	>1	0.261	pos >1
CA27	3.47512e-217	-0.598637	0.738	0.854	5.42015e-213	CA27_dura_base_skull_13	PHTF2	891	0	1.11111	neg	>1	0.261	neg >1
CA27	1.45712e-135	0.263773	0.5	0.307	2.27266e-131	CA27_dura_base_skull_13	PI4KA	891	0	1.5	pos	>1	0.261	pos >1
CA27	0	0.738445	0.703	0.35	0	CA27_dura_base_skull_13	PIAS2	891	0	1.2	pos	>1	0.261	pos >1
CA27	3.15085e-127	0.265545	0.523	0.334	4.91439e-123	CA27_dura_base_skull_13	PIK3CB	891	0	1.33333	pos	>1	0.261	pos >1
CA27	8.20067e-83	-0.28769	0.161	0.251	1.27906e-78	CA27_dura_base_skull_13	PIK3R1	891	0	1.5	neg	>1	0.261	neg >1
CA27	3.39059e-81	0.251299	0.419	0.275	5.28831e-77	CA27_dura_base_skull_13	PITPNC1	891	0	1.33333	pos	>1	0.261	pos >1
CA27	1.17992e-111	0.259458	0.46	0.289	1.84032e-107	CA27_dura_base_skull_13	PKD2	891	0	1.66667	pos	>1	0.261	pos >1
CA27	1.12507e-79	-0.293307	0.313	0.39	1.75477e-75	CA27_dura_base_skull_13	PKIA	891	0	1.5	neg	>1	0.261	neg >1
CA27	2.66359e-97	-0.334065	0.17	0.3	4.1544e-93	CA27_dura_base_skull_13	PKIB	891	0	1.33333	neg	>1	0.261	neg >1
CA27	0	0.475979	0.496	0.201	0	CA27_dura_base_skull_13	PKM	891	0	1.33333	pos	>1	0.261	pos >1
CA27	5.36093e-127	-0.361496	0.682	0.818	8.36144e-123	CA27_dura_base_skull_13	PKP4	891	0	1	neg	<1	0.261	neg <1
CA27	2.85238e-221	0.337479	0.264	0.085	4.44886e-217	CA27_dura_base_skull_13	PLAGL1	891	0	1.33333	pos	>1	0.261	pos >1
CA27	2.55172e-143	0.508446	0.795	0.658	3.97992e-139	CA27_dura_base_skull_13	PLCB4	891	0	1.5	pos	>1	0.261	pos >1
CA27	1.22399e-217	0.413032	0.786	0.567	1.90906e-213	CA27_dura_base_skull_13	PLEKHA7	891	0	1.33333	pos	>1	0.261	pos >1
CA27	2.9178e-134	-0.389415	0.543	0.554	4.55089e-130	CA27_dura_base_skull_13	PLEKHB2	891	0	1	neg	<1	0.261	neg <1
CA27	6.55135e-64	-0.39648	0.987	0.997	1.02181e-59	CA27_dura_base_skull_13	PLPP1	891	0	1.5	neg	>1	0.261	neg >1
CA27	4.29231e-90	-0.263304	0.147	0.263	6.69471e-86	CA27_dura_base_skull_13	PLXNA2	891	0	1	neg	<1	0.261	neg <1
CA27	2.74154e-54	-0.292252	0.815	0.867	4.27598e-50	CA27_dura_base_skull_13	PMEPA1	891	0	1.5	neg	>1	0.261	neg >1
CA27	0	1.00754	0.736	0.403	0	CA27_dura_base_skull_13	POLA1	891	0	1.33333	pos	>1	0.261	pos >1
CA27	6.85232e-148	-0.450346	0.388	0.545	1.06876e-143	CA27_dura_base_skull_13	POTEJ	891	0	1	neg	<1	0.261	neg <1
CA27	0	0.530326	0.238	0.016	0	CA27_dura_base_skull_13	PPARGC1A	891	0	1.25	pos	>1	0.261	pos >1
CA27	4.03712e-153	1.10538	0.455	0.27	6.2967e-149	CA27_dura_base_skull_13	PPFIA2	891	0	1.42857	pos	>1	0.261	pos >1
CA27	0	0.483884	0.328	0.055	0	CA27_dura_base_skull_13	PPFIA4	891	0	1	pos	<1	0.261	pos <1
CA27	0	0.874142	0.647	0.255	0	CA27_dura_base_skull_13	PPFIBP1	891	0	1.5	pos	>1	0.261	pos >1
CA27	5.64349e-42	0.264175	0.748	0.665	8.80215e-38	CA27_dura_base_skull_13	PPM1B	891	0	2	pos	>1	0.261	pos >1
CA27	9.33159e-235	0.465199	0.715	0.467	1.45545e-230	CA27_dura_base_skull_13	PPM1E	891	0	1.33333	pos	>1	0.261	pos >1
CA27	8.71956e-191	0.345245	0.505	0.281	1.35999e-186	CA27_dura_base_skull_13	PPME1	891	0	1.33333	pos	>1	0.261	pos >1
CA27	2.06311e-258	0.39815	0.545	0.281	3.21783e-254	CA27_dura_base_skull_13	PPP1CB	891	0	2	pos	>1	0.261	pos >1
CA27	1.94108e-297	0.537537	0.816	0.597	3.0275e-293	CA27_dura_base_skull_13	PPP2R2A	891	0	2	pos	>1	0.261	pos >1
CA27	0	0.440036	0.375	0.112	0	CA27_dura_base_skull_13	PPP2R2C	891	0	1.25	pos	>1	0.261	pos >1
CA27	0	0.782676	0.355	0.074	0	CA27_dura_base_skull_13	PRELID2	891	0	1.5	pos	>1	0.261	pos >1
CA27	1.16248e-148	0.278963	0.395	0.209	1.81312e-144	CA27_dura_base_skull_13	PREPL	891	0	2	pos	>1	0.261	pos >1
CA27	0	1.04782	0.909	0.713	0	CA27_dura_base_skull_13	PRIM2	891	0	1.33333	pos	>1	0.261	pos >1
CA27	2.89792e-270	-0.685013	0.731	0.886	4.51988e-266	CA27_dura_base_skull_13	PRKD1	891	0	1.11111	neg	>1	0.261	neg >1
CA27	3.06251e-130	0.319461	0.85	0.798	4.7766e-126	CA27_dura_base_skull_13	PRKDC	891	0	1.5	pos	>1	0.261	pos >1
CA27	4.23905e-174	0.297642	0.274	0.106	6.61164e-170	CA27_dura_base_skull_13	PRKN	891	0	1.33333	pos	>1	0.261	pos >1
CA27	1.52207e-160	0.321848	0.395	0.201	2.37397e-156	CA27_dura_base_skull_13	PRLR	891	0	1	pos	<1	0.261	pos <1
CA27	1.06137e-10	-0.280977	0.971	0.966	1.65542e-06	CA27_dura_base_skull_13	PRR16	891	0	1.5	neg	>1	0.261	neg >1
CA27	1.07439e-120	-0.257683	0.705	0.844	1.67573e-116	CA27_dura_base_skull_13	PRRC2C	891	0	1	neg	<1	0.261	neg <1
CA27	1.26366e-200	0.337813	0.754	0.518	1.97093e-196	CA27_dura_base_skull_13	PRUNE2	891	0	1.14286	pos	>1	0.261	pos >1
CA27	4.1512e-224	0.491383	0.753	0.547	6.47463e-220	CA27_dura_base_skull_13	PSD3	891	0	2	pos	>1	0.261	pos >1
CA27	5.97196e-132	0.252799	0.307	0.153	9.31447e-128	CA27_dura_base_skull_13	PSIP1	891	0	1.14286	pos	>1	0.261	pos >1
CA27	8.80661e-132	0.312996	0.634	0.446	1.37357e-127	CA27_dura_base_skull_13	PTGES3	891	0	1.42857	pos	>1	0.261	pos >1
CA27	2.53653302574896e-320	0.39032	0.994	0.982	3.95623056026065e-316	CA27_dura_base_skull_13	PTK2	891	0	1.5	pos	>1	0.261	pos >1
CA27	7.89491e-286	-0.530496	0.198	0.432	1.23137e-281	CA27_dura_base_skull_13	PTPN18	891	0	1	neg	<1	0.261	neg <1
CA27	5.31993557584128e-315	-0.650633	0.318	0.563	8.29750351763964e-311	CA27_dura_base_skull_13	PTPN21	891	0	1.11111	neg	>1	0.261	neg >1
CA27	2.39536e-111	0.253577	0.866	0.791	3.73605e-107	CA27_dura_base_skull_13	PTPRA	891	0	1.5	pos	>1	0.261	pos >1
CA27	3.77372e-240	0.492952	0.797	0.584	5.88588e-236	CA27_dura_base_skull_13	PTPRJ	891	0	1.33333	pos	>1	0.261	pos >1
CA27	0	0.455116	0.824	0.508	0	CA27_dura_base_skull_13	PTPRK	891	0	1.33333	pos	>1	0.261	pos >1
CA27	0	0.970095	0.861	0.457	0	CA27_dura_base_skull_13	PTPRM	891	0	1.2	pos	>1	0.261	pos >1
CA27	1.56642e-293	0.833135	0.492	0.24	2.44315e-289	CA27_dura_base_skull_13	PTPRN2	891	0	1.11111	pos	>1	0.261	pos >1
CA27	0	0.973435	0.624	0.156	0	CA27_dura_base_skull_13	PTPRT	891	0	1.5	pos	>1	0.261	pos >1
CA27	0	0.495277	0.945	0.825	0	CA27_dura_base_skull_13	PUM2	891	0	2	pos	>1	0.261	pos >1
CA27	0	0.676341	0.929	0.796	0	CA27_dura_base_skull_13	RAB10	891	0	2	pos	>1	0.261	pos >1
CA27	5.56497e-173	0.339879	0.43	0.252	8.67969e-169	CA27_dura_base_skull_13	RABL6	891	0	1.33333	pos	>1	0.261	pos >1
CA27	1.25012e-154	0.294501	0.577	0.366	1.9498e-150	CA27_dura_base_skull_13	RAD50	891	0	1.33333	pos	>1	0.261	pos >1
CA27	8.61299e-106	0.337293	0.946	0.946	1.34337e-101	CA27_dura_base_skull_13	RAD51B	891	0	1.11111	pos	>1	0.261	pos >1
CA27	1.45542e-224	0.350322	0.46	0.228	2.27002e-220	CA27_dura_base_skull_13	RAI1	891	0	1.33333	pos	>1	0.261	pos >1
CA27	1.62439e-184	-0.362482	0.9	0.958	2.53356e-180	CA27_dura_base_skull_13	RALGAPA1	891	0	1.11111	neg	>1	0.261	neg >1
CA27	2.12441e-132	-0.458113	0.816	0.88	3.31345e-128	CA27_dura_base_skull_13	RALGPS2	891	0	1	neg	<1	0.261	neg <1
CA27	5.07012e-271	0.448759	0.973	0.963	7.90787e-267	CA27_dura_base_skull_13	RANBP17	891	0	1.5	pos	>1	0.261	pos >1
CA27	3.15873e-212	0.414744	0.875	0.801	4.92668e-208	CA27_dura_base_skull_13	RAP1GDS1	891	0	1.66667	pos	>1	0.261	pos >1
CA27	6.08896e-99	-0.274031	0.191	0.311	9.49695e-95	CA27_dura_base_skull_13	RAPH1	891	0	1	neg	<1	0.261	neg <1
CA27	5.47823e-115	-0.391273	0.932	0.966	8.5444e-111	CA27_dura_base_skull_13	RASAL2	891	0	1	neg	<1	0.261	neg <1
CA27	0	0.680247	0.731	0.457	0	CA27_dura_base_skull_13	RASSF3	891	0	1.42857	pos	>1	0.261	pos >1
CA27	1.54007e-125	0.292611	0.575	0.384	2.40204e-121	CA27_dura_base_skull_13	RASSF8	891	0	1.5	pos	>1	0.261	pos >1
CA27	7.07659e-201	0.354344	0.879	0.775	1.10374e-196	CA27_dura_base_skull_13	RBFOX2	891	0	1.5	pos	>1	0.261	pos >1
CA27	8.90439e-236	0.389837	0.564	0.308	1.38882e-231	CA27_dura_base_skull_13	RBL1	891	0	1.5	pos	>1	0.261	pos >1
CA27	8.74666e-161	-0.80123	0.217	0.366	1.36422e-156	CA27_dura_base_skull_13	RBMS3	891	0	1.33333	neg	>1	0.261	neg >1
CA27	2.04388e-260	0.487572	0.765	0.542	3.18783e-256	CA27_dura_base_skull_13	RBPJ	891	0	1.25	pos	>1	0.261	pos >1
CA27	0	1.08641	0.803	0.389	0	CA27_dura_base_skull_13	RELN	891	0	1.11111	pos	>1	0.261	pos >1
CA27	5.43039e-253	0.369429	0.344	0.128	8.46979e-249	CA27_dura_base_skull_13	REPS2	891	0	1.33333	pos	>1	0.261	pos >1
CA27	2.27446e-293	0.441022	0.635	0.352	3.54748e-289	CA27_dura_base_skull_13	REV1	891	0	2	pos	>1	0.261	pos >1
CA27	7.28737e-119	0.255753	0.504	0.322	1.13661e-114	CA27_dura_base_skull_13	RFC1	891	0	1.25	pos	>1	0.261	pos >1
CA27	2.04236e-117	0.262363	0.305	0.161	3.18547e-113	CA27_dura_base_skull_13	RFX2	891	0	1.33333	pos	>1	0.261	pos >1
CA27	2.98487e-153	-0.378834	0.17	0.327	4.6555e-149	CA27_dura_base_skull_13	RFX3-AS1	891	0	1.14286	neg	>1	0.261	neg >1
CA27	2.37101e-92	0.266186	0.42	0.266	3.69806e-88	CA27_dura_base_skull_13	RFX6	891	0	1.33333	pos	>1	0.261	pos >1
CA27	2.80551e-140	0.265967	0.439	0.25	4.37575e-136	CA27_dura_base_skull_13	RGS12	891	0	1.25	pos	>1	0.261	pos >1
CA27	5.21187e-212	0.457511	0.775	0.535	8.12896e-208	CA27_dura_base_skull_13	RHOBTB1	891	0	1.33333	pos	>1	0.261	pos >1
CA27	6.5507e-234	0.304515	0.438	0.204	1.02171e-229	CA27_dura_base_skull_13	RHOBTB3	891	0	1.33333	pos	>1	0.261	pos >1
CA27	1.80178e-193	0.399991	0.852	0.704	2.81024e-189	CA27_dura_base_skull_13	RHPN2	891	0	1.33333	pos	>1	0.261	pos >1
CA27	1.43502e-270	0.829076	0.656	0.399	2.2382e-266	CA27_dura_base_skull_13	RIMS2	891	0	1.5	pos	>1	0.261	pos >1
CA27	2.07808e-92	-0.415971	0.875	0.922	3.24117e-88	CA27_dura_base_skull_13	RMST	891	0	1.42857	neg	>1	0.261	neg >1
CA27	3.93803e-223	-0.939215	0.435	0.625	6.14214e-219	CA27_dura_base_skull_13	RNF144B	891	0	1.33333	neg	>1	0.261	neg >1
CA27	0	0.601538	0.604	0.245	0	CA27_dura_base_skull_13	RNF149	891	0	3	pos	>1	0.261	pos >1
CA27	0	0.711254	0.603	0.283	0	CA27_dura_base_skull_13	RNF150	891	0	1.66667	pos	>1	0.261	pos >1
CA27	3.73742e-185	0.310488	0.346	0.153	5.82925e-181	CA27_dura_base_skull_13	RNF180	891	0	1.5	pos	>1	0.261	pos >1
CA27	3.02297e-230	0.430195	0.892	0.738	4.71493e-226	CA27_dura_base_skull_13	RNF24	891	0	1.5	pos	>1	0.261	pos >1
CA27	1.64665e-202	0.397807	0.496	0.268	2.56828e-198	CA27_dura_base_skull_13	RNF43	891	0	1.33333	pos	>1	0.261	pos >1
CA27	0	1.31799	0.441	0.168	0	CA27_dura_base_skull_13	ROBO1	891	0	1.33333	pos	>1	0.261	pos >1
CA27	2.22653e-160	0.260464	0.528	0.318	3.47272e-156	CA27_dura_base_skull_13	ROCK2	891	0	2	pos	>1	0.261	pos >1
CA27	4.55101e-226	0.394509	0.729	0.476	7.09821e-222	CA27_dura_base_skull_13	RORA	891	0	1.33333	pos	>1	0.261	pos >1
CA27	4.00353e-198	0.394612	0.37	0.165	6.24431e-194	CA27_dura_base_skull_13	RORB	891	0	1.14286	pos	>1	0.261	pos >1
CA27	2.06246e-206	0.329165	0.438	0.221	3.21682e-202	CA27_dura_base_skull_13	RPL31	891	0	3	pos	>1	0.261	pos >1
CA27	6.02404e-175	0.370489	0.536	0.317	9.39569e-171	CA27_dura_base_skull_13	RPS6KA2	891	0	1.33333	pos	>1	0.261	pos >1
CA27	2.09475e-160	0.27855	0.473	0.268	3.26718e-156	CA27_dura_base_skull_13	RPS6KC1	891	0	2	pos	>1	0.261	pos >1
CA27	6.58759e-137	0.271046	0.566	0.367	1.02747e-132	CA27_dura_base_skull_13	RREB1	891	0	1.33333	pos	>1	0.261	pos >1
CA27	0	-1.16839	0.486	0.636	0	CA27_dura_base_skull_13	RTN1	891	0	1.11111	neg	>1	0.261	neg >1
CA27	1.39677e-167	0.298242	0.367	0.176	2.17855e-163	CA27_dura_base_skull_13	RTN4	891	0	1.5	pos	>1	0.261	pos >1
CA27	7.76988e-66	-0.293046	0.485	0.543	1.21187e-61	CA27_dura_base_skull_13	RUFY3	891	0	1.66667	neg	>1	0.261	neg >1
CA27	5.80026e-87	0.419639	0.424	0.275	9.04667e-83	CA27_dura_base_skull_13	RUNX1	891	0	1.2	pos	>1	0.261	pos >1
CA27	9.38749e-95	0.269635	0.372	0.232	1.46417e-90	CA27_dura_base_skull_13	SAAL1	891	0	1.33333	pos	>1	0.261	pos >1
CA27	5.65792e-110	0.283088	0.871	0.826	8.82467e-106	CA27_dura_base_skull_13	SAMD12	891	0	1.5	pos	>1	0.261	pos >1
CA27	4.33481e-147	-0.500734	0.579	0.731	6.76101e-143	CA27_dura_base_skull_13	SAMD4A	891	0	1.11111	neg	>1	0.261	neg >1
CA27	1.84962e-171	0.262203	0.322	0.141	2.88485e-167	CA27_dura_base_skull_13	SASH1	891	0	1.33333	pos	>1	0.261	pos >1
CA27	4.0513e-90	0.257359	0.836	0.783	6.31881e-86	CA27_dura_base_skull_13	SCAPER	891	0	1.33333	pos	>1	0.261	pos >1
CA27	0	0.533081	0.389	0.124	0	CA27_dura_base_skull_13	SCARB1	891	0	1.25	pos	>1	0.261	pos >1
CA27	2.41771e-142	0.291135	0.433	0.248	3.7709e-138	CA27_dura_base_skull_13	SCARB2	891	0	1.66667	pos	>1	0.261	pos >1
CA27	5.80519e-305	0.324716	0.241	0.052	9.05436e-301	CA27_dura_base_skull_13	SCD5	891	0	1.66667	pos	>1	0.261	pos >1
CA27	1.19315e-289	0.481767	0.32	0.1	1.86095e-285	CA27_dura_base_skull_13	SCNN1G	891	0	1.33333	pos	>1	0.261	pos >1
CA27	1.3223e-189	0.386957	0.452	0.235	2.0624e-185	CA27_dura_base_skull_13	SEC24D	891	0	1.66667	pos	>1	0.261	pos >1
CA27	1.59688e-173	-0.600647	0.808	0.893	2.49065e-169	CA27_dura_base_skull_13	SEMA3C	891	0	1.11111	neg	>1	0.261	neg >1
CA27	3.29426e-259	0.394281	0.315	0.105	5.13806e-255	CA27_dura_base_skull_13	SEMA3E	891	0	1.11111	pos	>1	0.261	pos >1
CA27	0	1.16992	0.891	0.706	0	CA27_dura_base_skull_13	SERGEF	891	0	1.33333	pos	>1	0.261	pos >1
CA27	0	0.852264	0.495	0.087	0	CA27_dura_base_skull_13	SERHL2	891	0	1.5	pos	>1	0.261	pos >1
CA27	3.92952e-22	0.286193	0.745	0.692	6.12888e-18	CA27_dura_base_skull_13	SESN3	891	0	1.33333	pos	>1	0.261	pos >1
CA27	5.46561e-78	-0.271205	0.414	0.385	8.52472e-74	CA27_dura_base_skull_13	SFMBT2	891	0	1.33333	neg	>1	0.261	neg >1
CA27	1.46117e-178	0.324711	0.487	0.278	2.27899e-174	CA27_dura_base_skull_13	SFXN1	891	0	1.25	pos	>1	0.261	pos >1
CA27	6.44776e-179	-0.396645	0.008	0.12	1.00566e-174	CA27_dura_base_skull_13	SGCD	891	0	1.5	neg	>1	0.261	neg >1
CA27	5.49938e-276	0.294368	0.262	0.069	8.57738e-272	CA27_dura_base_skull_13	SGK2	891	0	1.5	pos	>1	0.261	pos >1
CA27	1.5226e-87	-0.322251	0.808	0.881	2.3748e-83	CA27_dura_base_skull_13	SGMS1	891	0	1.33333	neg	>1	0.261	neg >1
CA27	3.77199e-178	0.33798	0.701	0.476	5.88317e-174	CA27_dura_base_skull_13	SH3D19	891	0	1.66667	pos	>1	0.261	pos >1
CA27	0	0.638532	0.344	0.049	0	CA27_dura_base_skull_13	SH3GL3	891	0	1.33333	pos	>1	0.261	pos >1
CA27	1.37151e-180	0.295135	0.443	0.23	2.13914e-176	CA27_dura_base_skull_13	SH3PXD2A	891	0	1.33333	pos	>1	0.261	pos >1
CA27	1.20861e-54	-0.400405	0.972	0.985	1.88507e-50	CA27_dura_base_skull_13	SH3RF1	891	0	1.66667	neg	>1	0.261	neg >1
CA27	1.70085e-189	-0.476374	0.836	0.939	2.65281e-185	CA27_dura_base_skull_13	SHROOM3	891	0	1.66667	neg	>1	0.261	neg >1
CA27	1.20761e-156	0.328273	0.471	0.267	1.88352e-152	CA27_dura_base_skull_13	SIDT1	891	0	1.33333	pos	>1	0.261	pos >1
CA27	0	0.479483	0.905	0.759	0	CA27_dura_base_skull_13	SIL1	891	0	1.33333	pos	>1	0.261	pos >1
CA27	4.221e-248	0.509984	0.697	0.453	6.58349e-244	CA27_dura_base_skull_13	SIPA1L3	891	0	1.33333	pos	>1	0.261	pos >1
CA27	2.46014e-122	0.256066	0.318	0.167	3.83708e-118	CA27_dura_base_skull_13	SIRT1	891	0	1.33333	pos	>1	0.261	pos >1
CA27	6.90244e-221	0.501336	0.407	0.204	1.07657e-216	CA27_dura_base_skull_13	SLAIN1	891	0	1.33333	pos	>1	0.261	pos >1
CA27	2.43677e-170	0.312564	0.336	0.161	3.80063e-166	CA27_dura_base_skull_13	SLBP	891	0	1.25	pos	>1	0.261	pos >1
CA27	0	1.04527	0.642	0.304	0	CA27_dura_base_skull_13	SLC12A2	891	0	1.33333	pos	>1	0.261	pos >1
CA27	4.23979e-234	0.367516	0.492	0.247	6.61279e-230	CA27_dura_base_skull_13	SLC12A8	891	0	1.33333	pos	>1	0.261	pos >1
CA27	4.89461e-274	0.51829	0.873	0.7	7.63413e-270	CA27_dura_base_skull_13	SLC23A2	891	0	1.5	pos	>1	0.261	pos >1
CA27	8.2402e-142	-0.322248	0.709	0.849	1.28522e-137	CA27_dura_base_skull_13	SLC25A13	891	0	1.11111	neg	>1	0.261	neg >1
CA27	1.50103e-171	0.30899	0.409	0.211	2.34115e-167	CA27_dura_base_skull_13	SLC25A36	891	0	1.33333	pos	>1	0.261	pos >1
CA27	6.41707e-84	0.285961	0.145	0.062	1.00087e-79	CA27_dura_base_skull_13	SLC26A7	891	0	1.5	pos	>1	0.261	pos >1
CA27	1.84001e-71	-0.349333	0.229	0.29	2.86986e-67	CA27_dura_base_skull_13	SLC35F3	891	0	1.33333	neg	>1	0.261	neg >1
CA27	6.71592e-164	0.274878	0.737	0.528	1.04748e-159	CA27_dura_base_skull_13	SLC38A11	891	0	1	pos	<1	0.261	pos <1
CA27	4.95768e-126	-0.304965	0.154	0.302	7.7325e-122	CA27_dura_base_skull_13	SLC39A10	891	0	1	neg	<1	0.261	neg <1
CA27	6.53756e-115	-0.270433	0.178	0.317	1.01966e-110	CA27_dura_base_skull_13	SLC39A6	891	0	1.2	neg	>1	0.261	neg >1
CA27	1.42187e-194	-0.544979	0.365	0.547	2.21769e-190	CA27_dura_base_skull_13	SLC45A3	891	0	1	neg	<1	0.261	neg <1
CA27	6.87774e-228	-0.260203	0.61	0.436	1.07272e-223	CA27_dura_base_skull_13	SLC4A4	891	0	1.66667	neg	>1	0.261	neg >1
CA27	4.10576e-135	0.271971	0.185	0.063	6.40375e-131	CA27_dura_base_skull_13	SLC7A11	891	0	1.66667	pos	>1	0.261	pos >1
CA27	2.16922e-131	0.251263	0.284	0.137	3.38333e-127	CA27_dura_base_skull_13	SLF1	891	0	1.33333	pos	>1	0.261	pos >1
CA27	8.06835179819619e-312	0.459517	0.769	0.484	1.25842e-307	CA27_dura_base_skull_13	SLX4IP	891	0	1.5	pos	>1	0.261	pos >1
CA27	0	0.434483	0.431	0.161	0	CA27_dura_base_skull_13	SMAD3	891	0	1.33333	pos	>1	0.261	pos >1
CA27	6.50617e-300	0.364484	0.277	0.073	1.01477e-295	CA27_dura_base_skull_13	SMAD9	891	0	1.33333	pos	>1	0.261	pos >1
CA27	9.8186e-145	0.29785	0.397	0.213	1.53141e-140	CA27_dura_base_skull_13	SMARCA2	891	0	1.14286	pos	>1	0.261	pos >1
CA27	4.04098e-52	-0.294427	0.919	0.918	6.30271e-48	CA27_dura_base_skull_13	SMCHD1	891	0	1.2	neg	>1	0.261	neg >1
CA27	4.65602e-54	-0.30467	0.292	0.276	7.26199e-50	CA27_dura_base_skull_13	SMOC1	891	0	1.11111	neg	>1	0.261	neg >1
CA27	1.85364e-82	-0.303318	0.982	0.989	2.89112e-78	CA27_dura_base_skull_13	SND1	891	0	1.11111	neg	>1	0.261	neg >1
CA27	4.04506e-167	0.352668	0.594	0.378	6.30909e-163	CA27_dura_base_skull_13	SNX25	891	0	1.66667	pos	>1	0.261	pos >1
CA27	4.00172e-67	-0.342144	0.313	0.43	6.24148e-63	CA27_dura_base_skull_13	SOD2	891	0	1.33333	neg	>1	0.261	neg >1
CA27	2.38317e-114	0.268755	0.705	0.53	3.71704e-110	CA27_dura_base_skull_13	SOS1	891	0	1.5	pos	>1	0.261	pos >1
CA27	2.53904e-86	-0.335532	0.073	0.163	3.96015e-82	CA27_dura_base_skull_13	SOX6	891	0	1.33333	neg	>1	0.261	neg >1
CA27	0	0.577322	0.792	0.481	0	CA27_dura_base_skull_13	SPATS2	891	0	1.42857	pos	>1	0.261	pos >1
CA27	1.73559e-195	0.324819	0.577	0.34	2.707e-191	CA27_dura_base_skull_13	SPECC1L	891	0	1.5	pos	>1	0.261	pos >1
CA27	2.64296958783254e-318	0.487207	0.989	0.993	4.12223966614241e-314	CA27_dura_base_skull_13	SPIDR	891	0	1.5	pos	>1	0.261	pos >1
CA27	2.9872e-195	0.320953	0.588	0.351	4.65914e-191	CA27_dura_base_skull_13	SPIN1	891	0	1.14286	pos	>1	0.261	pos >1
CA27	0	0.676075	0.447	0.072	0	CA27_dura_base_skull_13	SPINK1	891	0	1.5	pos	>1	0.261	pos >1
CA27	2.74628e-106	-0.308367	0.51	0.458	4.28337e-102	CA27_dura_base_skull_13	SPOCK1	891	0	1.33333	neg	>1	0.261	neg >1
CA27	5.54736e-264	-0.433687	0.002	0.144	8.65221e-260	CA27_dura_base_skull_13	SPOCK3	891	0	1.66667	neg	>1	0.261	neg >1
CA27	1.07161e-73	-0.262841	0.301	0.383	1.67139e-69	CA27_dura_base_skull_13	SPON2	891	0	1.25	neg	>1	0.261	neg >1
CA27	4.09428e-192	0.353158	0.86	0.766	6.38585e-188	CA27_dura_base_skull_13	SPPL3	891	0	1.25	pos	>1	0.261	pos >1
CA27	1.78275e-79	-0.297483	0.165	0.272	2.78056e-75	CA27_dura_base_skull_13	SPTLC3	891	0	1.5	neg	>1	0.261	neg >1
CA27	6.41868e-264	0.373029	0.479	0.221	1.00112e-259	CA27_dura_base_skull_13	SRBD1	891	0	2	pos	>1	0.261	pos >1
CA27	3.96512e-125	0.266844	0.31	0.158	6.1844e-121	CA27_dura_base_skull_13	SRD5A1	891	0	1.6	pos	>1	0.261	pos >1
CA27	9.94851e-64	0.256615	0.281	0.171	1.55167e-59	CA27_dura_base_skull_13	SRGAP1	891	0	1.42857	pos	>1	0.261	pos >1
CA27	4.59795e-135	0.273377	0.589	0.391	7.17143e-131	CA27_dura_base_skull_13	SRPK1	891	0	1.33333	pos	>1	0.261	pos >1
CA27	2.18449e-118	0.261995	0.935	0.922	3.40715e-114	CA27_dura_base_skull_13	SRPK2	891	0	1.11111	pos	>1	0.261	pos >1
CA27	3.41541e-150	0.290596	0.598	0.389	5.32701e-146	CA27_dura_base_skull_13	SRSF4	891	0	1.5	pos	>1	0.261	pos >1
CA27	3.82355e-108	0.30273	0.945	0.891	5.96359e-104	CA27_dura_base_skull_13	SSBP2	891	0	1.5	pos	>1	0.261	pos >1
CA27	4.98177e-233	0.425443	0.887	0.767	7.77007e-229	CA27_dura_base_skull_13	SSH2	891	0	1.33333	pos	>1	0.261	pos >1
CA27	2.11218e-47	-0.252615	0.126	0.197	3.29436e-43	CA27_dura_base_skull_13	ST6GALNAC5	891	0	1.5	neg	>1	0.261	neg >1
CA27	3.02242e-83	0.369473	0.386	0.26	4.71407e-79	CA27_dura_base_skull_13	ST7	891	0	1.11111	pos	>1	0.261	pos >1
CA27	3.30591e-94	-0.350971	0.668	0.681	5.15623e-90	CA27_dura_base_skull_13	STARD13	891	0	1.33333	neg	>1	0.261	neg >1
CA27	2.40548e-228	-0.410803	0.174	0.395	3.75183e-224	CA27_dura_base_skull_13	STEAP1	891	0	1.11111	neg	>1	0.261	neg >1
CA27	0	-1.20227	0.77	0.97	0	CA27_dura_base_skull_13	STEAP2	891	0	1.11111	neg	>1	0.261	neg >1
CA27	0	-1.21233	0.406	0.803	0	CA27_dura_base_skull_13	STEAP2-AS1	891	0	1.11111	neg	>1	0.261	neg >1
CA27	3.24279e-135	0.281041	0.574	0.376	5.05778e-131	CA27_dura_base_skull_13	STK24	891	0	1.33333	pos	>1	0.261	pos >1
CA27	3.10987e-88	-0.308471	0.097	0.215	4.85046e-84	CA27_dura_base_skull_13	STXBP5L	891	0	1.33333	neg	>1	0.261	neg >1
CA27	0	0.749946	0.508	0.131	0	CA27_dura_base_skull_13	STXBP6	891	0	1.11111	pos	>1	0.261	pos >1
CA27	0	0.550139	0.459	0.188	0	CA27_dura_base_skull_13	SYBU	891	0	1.5	pos	>1	0.261	pos >1
CA27	0	0.542467	0.611	0.308	0	CA27_dura_base_skull_13	SYCP2	891	0	1.5	pos	>1	0.261	pos >1
CA27	8.16419e-194	0.416465	0.759	0.537	1.27337e-189	CA27_dura_base_skull_13	SYNE2	891	0	1.11111	pos	>1	0.261	pos >1
CA27	5.57659e-152	0.322235	0.531	0.327	8.69781e-148	CA27_dura_base_skull_13	SYNJ2	891	0	1.33333	pos	>1	0.261	pos >1
CA27	2.44499e-287	-1.2826	0.712	0.752	3.81345e-283	CA27_dura_base_skull_13	SYT1	891	0	1.42857	neg	>1	0.261	neg >1
CA27	0	0.358424	0.306	0.07	0	CA27_dura_base_skull_13	SYT7	891	0	1.33333	pos	>1	0.261	pos >1
CA27	5.01852e-239	0.450913	0.774	0.526	7.82739e-235	CA27_dura_base_skull_13	SYTL2	891	0	1.33333	pos	>1	0.261	pos >1
CA27	4.41303e-193	0.310236	0.453	0.232	6.88301e-189	CA27_dura_base_skull_13	TACC1	891	0	1.5	pos	>1	0.261	pos >1
CA27	0	0.572525	0.575	0.238	0	CA27_dura_base_skull_13	TACC2	891	0	1.33333	pos	>1	0.261	pos >1
CA27	1.50548e-62	-0.267031	0.533	0.587	2.3481e-58	CA27_dura_base_skull_13	TANC1	891	0	1	neg	<1	0.261	neg <1
CA27	1.50753e-279	-0.604243	0.444	0.648	2.3513e-275	CA27_dura_base_skull_13	TAPT1-AS1	891	0	1.25	neg	>1	0.261	neg >1
CA27	2.13484e-130	-0.311899	0.61	0.767	3.3297e-126	CA27_dura_base_skull_13	TAX1BP1	891	0	1.11111	neg	>1	0.261	neg >1
CA27	4.1786e-305	0.45923	0.495	0.218	6.51737e-301	CA27_dura_base_skull_13	TBC1D1	891	0	1.25	pos	>1	0.261	pos >1
CA27	1.36804e-251	0.55334	0.717	0.49	2.13374e-247	CA27_dura_base_skull_13	TBC1D14	891	0	1.25	pos	>1	0.261	pos >1
CA27	3.07595e-256	0.419765	0.646	0.378	4.79756e-252	CA27_dura_base_skull_13	TBC1D22A	891	0	1.5	pos	>1	0.261	pos >1
CA27	0	1.17479	0.738	0.215	0	CA27_dura_base_skull_13	TBC1D4	891	0	1.33333	pos	>1	0.261	pos >1
CA27	1.90635e-151	0.317864	0.96	0.949	2.97333e-147	CA27_dura_base_skull_13	TBC1D5	891	0	1.33333	pos	>1	0.261	pos >1
CA27	0	1.14306	0.986	0.947	0	CA27_dura_base_skull_13	TBC1D8	891	0	3	pos	>1	0.261	pos >1
CA27	1.11572e-215	0.371149	0.494	0.264	1.74019e-211	CA27_dura_base_skull_13	TBCD	891	0	1.33333	pos	>1	0.261	pos >1
CA27	2.76654e-208	0.383453	0.643	0.397	4.31498e-204	CA27_dura_base_skull_13	TBL1X	891	0	1.33333	pos	>1	0.261	pos >1
CA27	1.31056e-160	0.322106	0.898	0.788	2.04407e-156	CA27_dura_base_skull_13	TCF12	891	0	1.33333	pos	>1	0.261	pos >1
CA27	9.36685e-129	0.279321	0.503	0.315	1.46095e-124	CA27_dura_base_skull_13	TCF20	891	0	1.5	pos	>1	0.261	pos >1
CA27	0	0.546099	0.589	0.255	0	CA27_dura_base_skull_13	TCF7L2	891	0	1.33333	pos	>1	0.261	pos >1
CA27	3.73653e-262	0.45355	0.464	0.223	5.82786e-258	CA27_dura_base_skull_13	TDRP	891	0	1.5	pos	>1	0.261	pos >1
CA27	8.11812e-106	-0.446568	0.568	0.7	1.26618e-101	CA27_dura_base_skull_13	TENM1	891	0	1.33333	neg	>1	0.261	neg >1
CA27	0	-3.20277	0.248	0.829	0	CA27_dura_base_skull_13	TENM2	891	0	1.5	neg	>1	0.261	neg >1
CA27	1.15709e-111	0.25465	0.457	0.286	1.80471e-107	CA27_dura_base_skull_13	TFDP1	891	0	1.33333	pos	>1	0.261	pos >1
CA27	0	0.509165	0.786	0.503	0	CA27_dura_base_skull_13	TFDP2	891	0	1.33333	pos	>1	0.261	pos >1
CA27	0	-0.498568	0.573	0.386	0	CA27_dura_base_skull_13	TGM4	891	0	1.33333	neg	>1	0.261	neg >1
CA27	8.34504e-178	-0.485295	0.376	0.588	1.30158e-173	CA27_dura_base_skull_13	THRB	891	0	1.33333	neg	>1	0.261	neg >1
CA27	2.93936e-226	-0.426345	0.761	0.909	4.58452e-222	CA27_dura_base_skull_13	TLK1	891	0	1	neg	<1	0.261	neg <1
CA27	6.75424e-27	-0.265093	0.77	0.806	1.05346e-22	CA27_dura_base_skull_13	TMC5	891	0	1.33333	neg	>1	0.261	neg >1
CA27	1.58686e-169	0.323163	0.463	0.262	2.47502e-165	CA27_dura_base_skull_13	TMCO4	891	0	1.5	pos	>1	0.261	pos >1
CA27	0	1.13027	0.962	0.716	0	CA27_dura_base_skull_13	TMEFF2	891	0	1	pos	<1	0.261	pos <1
CA27	2.29074e-200	0.419306	0.808	0.622	3.57287e-196	CA27_dura_base_skull_13	TMEM117	891	0	1.42857	pos	>1	0.261	pos >1
CA27	9.51669e-133	0.304036	0.495	0.304	1.48432e-128	CA27_dura_base_skull_13	TMEM123	891	0	1.33333	pos	>1	0.261	pos >1
CA27	1.80941e-126	0.276421	0.486	0.301	2.82214e-122	CA27_dura_base_skull_13	TMEM14B	891	0	1.33333	pos	>1	0.261	pos >1
CA27	1.64976e-260	0.284568	0.224	0.053	2.57314e-256	CA27_dura_base_skull_13	TMEM150C	891	0	1.66667	pos	>1	0.261	pos >1
CA27	1.29187e-69	0.302716	0.793	0.705	2.01493e-65	CA27_dura_base_skull_13	TMEM165	891	0	1.42857	pos	>1	0.261	pos >1
CA27	0	0.312812	0.201	0.03	0	CA27_dura_base_skull_13	TMEM178A	891	0	1.5	pos	>1	0.261	pos >1
CA27	1.04234e-41	-0.263001	0.786	0.838	1.62573e-37	CA27_dura_base_skull_13	TMEM178B	891	0	1.11111	neg	>1	0.261	neg >1
CA27	9.20807e-123	0.255964	0.469	0.287	1.43618e-118	CA27_dura_base_skull_13	TMEM245	891	0	1.14286	pos	>1	0.261	pos >1
CA27	3.06998e-68	-0.340766	0.854	0.894	4.78824e-64	CA27_dura_base_skull_13	TMTC2	891	0	1.42857	neg	>1	0.261	neg >1
CA27	1.79137e-276	0.449451	0.37	0.135	2.79401e-272	CA27_dura_base_skull_13	TNFRSF19	891	0	1.33333	pos	>1	0.261	pos >1
CA27	1.80649e-98	0.339078	0.11	0.043	2.81758e-94	CA27_dura_base_skull_13	TNIK	891	0	1.33333	pos	>1	0.261	pos >1
CA27	3.11641e-118	0.275488	0.855	0.745	4.86067e-114	CA27_dura_base_skull_13	TNKS	891	0	2	pos	>1	0.261	pos >1
CA27	9.58066e-192	0.358386	0.723	0.499	1.4943e-187	CA27_dura_base_skull_13	TNRC6B	891	0	1.5	pos	>1	0.261	pos >1
CA27	5.55189e-264	0.409104	0.48	0.227	8.65928e-260	CA27_dura_base_skull_13	TPCN1	891	0	1.25	pos	>1	0.261	pos >1
CA27	3.75489890839347e-322	0.585513	0.925	0.833	5.8565158274213e-318	CA27_dura_base_skull_13	TPD52	891	0	1.5	pos	>1	0.261	pos >1
CA27	1.74427e-125	0.261516	0.492	0.306	2.72054e-121	CA27_dura_base_skull_13	TPST1	891	0	1.11111	pos	>1	0.261	pos >1
CA27	2.39116e-119	-0.253967	0.736	0.866	3.72949e-115	CA27_dura_base_skull_13	TRA2A	891	0	1.11111	neg	>1	0.261	neg >1
CA27	4.18071e-158	0.301757	0.484	0.284	6.52065e-154	CA27_dura_base_skull_13	TRAPPC12	891	0	2	pos	>1	0.261	pos >1
CA27	4.67623e-297	0.418599	0.976	0.969	7.29352e-293	CA27_dura_base_skull_13	TRAPPC9	891	0	1.5	pos	>1	0.261	pos >1
CA27	2.92089e-90	-0.387793	0.569	0.674	4.55572e-86	CA27_dura_base_skull_13	TRGC1	891	0	1.11111	neg	>1	0.261	neg >1
CA27	6.40649e-147	-0.414939	0.626	0.762	9.99221e-143	CA27_dura_base_skull_13	TRIM36	891	0	1.5	neg	>1	0.261	neg >1
CA27	2.77331e-102	-0.298568	0.47	0.606	4.32553e-98	CA27_dura_base_skull_13	TRIP12	891	0	1	neg	<1	0.261	neg <1
CA27	3.41787e-110	0.251745	0.491	0.316	5.33085e-106	CA27_dura_base_skull_13	TRIQK	891	0	1.5	pos	>1	0.261	pos >1
CA27	3.63204e-175	0.377602	0.678	0.459	5.6649e-171	CA27_dura_base_skull_13	TRMT11	891	0	1.33333	pos	>1	0.261	pos >1
CA27	0	0.562436	0.738	0.434	0	CA27_dura_base_skull_13	TRPS1	891	0	1.5	pos	>1	0.261	pos >1
CA27	0	1.41992	0.866	0.377	0	CA27_dura_base_skull_13	TSPAN5	891	0	1.66667	pos	>1	0.261	pos >1
CA27	5.78935e-98	0.28227	0.837	0.781	9.02965e-94	CA27_dura_base_skull_13	TTC28	891	0	1.5	pos	>1	0.261	pos >1
CA27	0	-0.565951	0.96	0.994	0	CA27_dura_base_skull_13	TTC6	891	0	1.11111	neg	>1	0.261	neg >1
CA27	0	0.792211	0.911	0.847	0	CA27_dura_base_skull_13	TTLL5	891	0	1.11111	pos	>1	0.261	pos >1
CA27	2.26832e-138	0.288928	0.481	0.29	3.53789e-134	CA27_dura_base_skull_13	TUBGCP3	891	0	1.33333	pos	>1	0.261	pos >1
CA27	2.15203e-146	0.323151	0.704	0.505	3.35651e-142	CA27_dura_base_skull_13	TUSC3	891	0	2	pos	>1	0.261	pos >1
CA27	1.93496e-153	-0.376747	0.358	0.52	3.01795e-149	CA27_dura_base_skull_13	TUT7	891	0	1.14286	neg	>1	0.261	neg >1
CA27	4.38418e-144	-0.299079	0.106	0.265	6.83801e-140	CA27_dura_base_skull_13	TXNIP	891	0	1	neg	<1	0.261	neg <1
CA27	1.82084e-121	0.26404	0.561	0.373	2.83996e-117	CA27_dura_base_skull_13	UBA6	891	0	1.66667	pos	>1	0.261	pos >1
CA27	9.73065e-240	-0.499259	0.148	0.354	1.51769e-235	CA27_dura_base_skull_13	UBE2E3	891	0	1	neg	<1	0.261	neg <1
CA27	4.91701e-212	-0.507679	0.153	0.334	7.66906e-208	CA27_dura_base_skull_13	UGT2B15	891	0	1.66667	neg	>1	0.261	neg >1
CA27	1.28851e-109	0.253002	0.439	0.271	2.00969e-105	CA27_dura_base_skull_13	ULK2	891	0	1.33333	pos	>1	0.261	pos >1
CA27	1.05288e-156	0.314267	0.555	0.345	1.64218e-152	CA27_dura_base_skull_13	USO1	891	0	1.66667	pos	>1	0.261	pos >1
CA27	1.66545e-103	0.274602	0.499	0.332	2.5976e-99	CA27_dura_base_skull_13	USP12	891	0	1.33333	pos	>1	0.261	pos >1
CA27	3.18048e-178	0.335138	0.501	0.282	4.96059e-174	CA27_dura_base_skull_13	USP3	891	0	1.33333	pos	>1	0.261	pos >1
CA27	7.6628e-145	0.265868	0.412	0.225	1.19517e-140	CA27_dura_base_skull_13	USP48	891	0	1.5	pos	>1	0.261	pos >1
CA27	1.07884e-166	0.330713	0.439	0.236	1.68266e-162	CA27_dura_base_skull_13	USP53	891	0	1.66667	pos	>1	0.261	pos >1
CA27	9.83263e-95	-0.301941	0.767	0.863	1.5336e-90	CA27_dura_base_skull_13	USP54	891	0	1.33333	neg	>1	0.261	neg >1
CA27	1.82984371936645e-315	-0.771198	0.794	0.908	2.85400724909586e-311	CA27_dura_base_skull_13	UTRN	891	0	1.33333	neg	>1	0.261	neg >1
CA27	0	0.376141	0.243	0.014	0	CA27_dura_base_skull_13	UTS2B	891	0	1.33333	pos	>1	0.261	pos >1
CA27	6.26281e-164	0.310555	0.548	0.335	9.7681e-160	CA27_dura_base_skull_13	VAPB	891	0	1.5	pos	>1	0.261	pos >1
CA27	2.43448e-133	-0.279601	0.035	0.147	3.79705e-129	CA27_dura_base_skull_13	VEGFC	891	0	1.66667	neg	>1	0.261	neg >1
CA27	1.24788e-234	0.42801	0.681	0.426	1.94632e-230	CA27_dura_base_skull_13	VGLL4	891	0	1.33333	pos	>1	0.261	pos >1
CA27	6.2268e-189	0.414644	0.777	0.622	9.71194e-185	CA27_dura_base_skull_13	VPS13A	891	0	1.14286	pos	>1	0.261	pos >1
CA27	8.43017e-236	0.445754	0.533	0.279	1.31485e-231	CA27_dura_base_skull_13	VPS13C	891	0	1.33333	pos	>1	0.261	pos >1
CA27	8.71358e-194	0.352196	0.462	0.247	1.35906e-189	CA27_dura_base_skull_13	VPS37B	891	0	1.25	pos	>1	0.261	pos >1
CA27	4.54961e-154	0.418761	0.482	0.288	7.09602e-150	CA27_dura_base_skull_13	WASF3	891	0	1.33333	pos	>1	0.261	pos >1
CA27	7.40824e-122	0.254992	0.605	0.416	1.15546e-117	CA27_dura_base_skull_13	WDPCP	891	0	1.5	pos	>1	0.261	pos >1
CA27	4.57456e-150	0.283522	0.468	0.27	7.13493e-146	CA27_dura_base_skull_13	WDR43	891	0	2	pos	>1	0.261	pos >1
CA27	0	0.68673	0.558	0.213	0	CA27_dura_base_skull_13	WDR45B	891	0	1.33333	pos	>1	0.261	pos >1
CA27	2.34535e-248	0.282943	0.336	0.127	3.65804e-244	CA27_dura_base_skull_13	WNT5B	891	0	1.2	pos	>1	0.261	pos >1
CA27	2.09552e-206	0.442355	0.417	0.224	3.26839e-202	CA27_dura_base_skull_13	WSB1	891	0	1.33333	pos	>1	0.261	pos >1
CA27	2.42158e-95	-0.38637	0.691	0.8	3.77694e-91	CA27_dura_base_skull_13	WWOX	891	0	1.33333	neg	>1	0.261	neg >1
CA27	0	-1.19451	0.35	0.614	0	CA27_dura_base_skull_13	XACT	891	0	1.33333	neg	>1	0.261	neg >1
CA27	1.19728e-192	0.325317	0.709	0.474	1.8674e-188	CA27_dura_base_skull_13	XKR6	891	0	2	pos	>1	0.261	pos >1
CA27	4.93968e-155	0.328648	0.825	0.725	7.70441e-151	CA27_dura_base_skull_13	XPO1	891	0	1.5	pos	>1	0.261	pos >1
CA27	1.93826e-183	0.322648	0.657	0.426	3.0231e-179	CA27_dura_base_skull_13	XPO6	891	0	1.33333	pos	>1	0.261	pos >1
CA27	8.96806e-111	0.269771	0.478	0.308	1.39875e-106	CA27_dura_base_skull_13	XYLB	891	0	1.33333	pos	>1	0.261	pos >1
CA27	0	0.521474	0.695	0.34	0	CA27_dura_base_skull_13	YAP1	891	0	1.33333	pos	>1	0.261	pos >1
CA27	0	0.591438	0.684	0.341	0	CA27_dura_base_skull_13	YEATS2	891	0	1.33333	pos	>1	0.261	pos >1
CA27	2.63497e-117	-0.275217	0.528	0.571	4.10977e-113	CA27_dura_base_skull_13	ZBTB1	891	0	1.11111	neg	>1	0.261	neg >1
CA27	2.69066e-125	0.309795	0.918	0.939	4.19663e-121	CA27_dura_base_skull_13	ZBTB16	891	0	1.33333	pos	>1	0.261	pos >1
CA27	1.03621e-174	-0.561234	0.492	0.646	1.61618e-170	CA27_dura_base_skull_13	ZDHHC14	891	0	1.33333	neg	>1	0.261	neg >1
CA27	1.35145e-130	0.258475	0.516	0.324	2.10785e-126	CA27_dura_base_skull_13	ZDHHC21	891	0	1.14286	pos	>1	0.261	pos >1
CA27	1.27115e-224	-0.401652	0.773	0.908	1.98261e-220	CA27_dura_base_skull_13	ZFR	891	0	1	neg	<1	0.261	neg <1
CA27	0	0.902056	0.68	0.365	0	CA27_dura_base_skull_13	ZFX	891	0	1.33333	pos	>1	0.261	pos >1
CA27	2.73061e-244	0.42346	0.57	0.312	4.25893e-240	CA27_dura_base_skull_13	ZHX3	891	0	1.5	pos	>1	0.261	pos >1
CA27	4.77221e-133	0.265364	0.649	0.452	7.44321e-129	CA27_dura_base_skull_13	ZMYM4	891	0	1.5	pos	>1	0.261	pos >1
CA27	0	0.678368	0.709	0.368	0	CA27_dura_base_skull_13	ZMYND8	891	0	1.5	pos	>1	0.261	pos >1
CA27	1.50267e-127	0.284243	0.52	0.332	2.34371e-123	CA27_dura_base_skull_13	ZNF248	891	0	1.14286	pos	>1	0.261	pos >1
CA27	4.57553e-83	-0.267511	0.325	0.413	7.13645e-79	CA27_dura_base_skull_13	ZNF277	891	0	1.11111	neg	>1	0.261	neg >1
CA27	5.30684e-120	0.330002	0.778	0.661	8.27708e-116	CA27_dura_base_skull_13	ZNF292	891	0	1.33333	pos	>1	0.261	pos >1
CA27	3.13453e-148	0.323092	0.645	0.44	4.88892e-144	CA27_dura_base_skull_13	ZNF337-AS1	891	0	1.5	pos	>1	0.261	pos >1
CA27	6.83609e-202	-0.597304	0.292	0.322	1.06622e-197	CA27_dura_base_skull_13	ZNF385B	891	0	1	neg	<1	0.261	neg <1
CA27	3.13548e-207	0.328534	0.554	0.313	4.8904e-203	CA27_dura_base_skull_13	ZNF609	891	0	1.33333	pos	>1	0.261	pos >1
CA27	6.24195e-189	0.381394	0.775	0.561	9.73557e-185	CA27_dura_base_skull_13	ZNF704	891	0	1.5	pos	>1	0.261	pos >1
CA27	1.0871e-170	0.266091	0.295	0.124	1.69556e-166	CA27_dura_base_skull_13	ZNF717	891	0	1.33333	pos	>1	0.261	pos >1
CA27	9.06041e-113	0.29074	0.541	0.366	1.41315e-108	CA27_dura_base_skull_13	ZNF83	891	0	1.33333	pos	>1	0.261	pos >1
CA27	2.74341e-251	0.420158	0.46	0.218	4.2789e-247	CA27_dura_base_skull_13	ZNRF3	891	0	1.5	pos	>1	0.261	pos >1
CA27	2.22104e-116	0.259779	0.488	0.309	3.46416e-112	CA27_dura_base_skull_13	ZSWIM5	891	0	1.5	pos	>1	0.261	pos >1
CA27	5.28507e-122	-0.520338	0.833	0.873	8.24312e-118	CA27_dura_base_skull_13	ZSWIM6	891	0	1.5	neg	>1	0.261	neg >1
CA27	1.01288e-183	0.365248	0.758	0.597	1.57979e-179	CA27_dura_inner_skull_14	AAK1	NA	NA	NA	NA	NA	NA	NA
CA27	3.56157102117579e-319	-0.354652	0.092	0.294	5.55498232172789e-315	CA27_dura_inner_skull_14	ABCC1	NA	NA	NA	NA	NA	NA	NA
CA27	0	-0.823593	0.689	0.826	0	CA27_dura_inner_skull_14	ABCC4	NA	NA	NA	NA	NA	NA	NA
CA27	0	-0.779643	0.187	0.53	0	CA27_dura_inner_skull_14	ABCC5	NA	NA	NA	NA	NA	NA	NA
CA27	3.06038e-268	-0.31614	0.246	0.472	4.77327e-264	CA27_dura_inner_skull_14	ABCD3	NA	NA	NA	NA	NA	NA	NA
CA27	5.30867e-241	-0.295087	0.086	0.256	8.27993e-237	CA27_dura_inner_skull_14	ABHD17C	NA	NA	NA	NA	NA	NA	NA
CA27	0	-0.566369	0.111	0.397	0	CA27_dura_inner_skull_14	ABHD2	NA	NA	NA	NA	NA	NA	NA
CA27	0	-0.487182	0.346	0.676	0	CA27_dura_inner_skull_14	ABL2	NA	NA	NA	NA	NA	NA	NA
CA27	0	-0.358877	0.133	0.365	0	CA27_dura_inner_skull_14	AC005670.3	NA	NA	NA	NA	NA	NA	NA
CA27	7.35307e-209	-0.283007	0.12	0.285	1.14686e-204	CA27_dura_inner_skull_14	AC006001.2	NA	NA	NA	NA	NA	NA	NA
CA27	1.48219693752374e-323	-0.487952	0.15	0.342	2.31178256345578e-319	CA27_dura_inner_skull_14	AC006994.2	NA	NA	NA	NA	NA	NA	NA
CA27	3.30258e-250	-0.294911	0.12	0.306	5.15103e-246	CA27_dura_inner_skull_14	AC007216.4	NA	NA	NA	NA	NA	NA	NA
CA27	2.57557e-301	0.66098	0.509	0.29	4.01712e-297	CA27_dura_inner_skull_14	AC008415.1	NA	NA	NA	NA	NA	NA	NA
CA27	6.21604245724352e-318	-0.330236	0.069	0.257	9.69516142056271e-314	CA27_dura_inner_skull_14	AC008629.1	NA	NA	NA	NA	NA	NA	NA
CA27	2.76337e-202	-0.297181	0.166	0.346	4.31003e-198	CA27_dura_inner_skull_14	AC008771.1	NA	NA	NA	NA	NA	NA	NA
CA27	0	1.85661	0.995	0.716	0	CA27_dura_inner_skull_14	AC010983.1	NA	NA	NA	NA	NA	NA	NA
CA27	1.20247e-72	-0.255691	0.072	0.151	1.87549e-68	CA27_dura_inner_skull_14	AC011287.1	NA	NA	NA	NA	NA	NA	NA
CA27	5.49237e-286	0.26384	0.22	0.06	8.56646e-282	CA27_dura_inner_skull_14	AC011369.1	NA	NA	NA	NA	NA	NA	NA
CA27	4.53914e-121	-0.289024	0.163	0.299	7.07969e-117	CA27_dura_inner_skull_14	AC013287.1	NA	NA	NA	NA	NA	NA	NA
CA27	0	-0.783549	0.386	0.703	0	CA27_dura_inner_skull_14	AC013652.1	NA	NA	NA	NA	NA	NA	NA
CA27	0	-0.934197	0.161	0.551	0	CA27_dura_inner_skull_14	AC019197.1	NA	NA	NA	NA	NA	NA	NA
CA27	0	0.584499	0.34	0.056	0	CA27_dura_inner_skull_14	AC022034.3	NA	NA	NA	NA	NA	NA	NA
CA27	6.77626e-290	-0.28653	0.068	0.246	1.05689e-285	CA27_dura_inner_skull_14	AC022146.2	NA	NA	NA	NA	NA	NA	NA
CA27	6.71708e-300	-0.315432	0.097	0.294	1.04766e-295	CA27_dura_inner_skull_14	AC025682.1	NA	NA	NA	NA	NA	NA	NA
CA27	0	-0.488194	0.076	0.323	0	CA27_dura_inner_skull_14	AC026765.3	NA	NA	NA	NA	NA	NA	NA
CA27	3.11758e-194	-0.436786	0.184	0.359	4.86248e-190	CA27_dura_inner_skull_14	AC027117.2	NA	NA	NA	NA	NA	NA	NA
CA27	1.50578e-186	0.356662	0.322	0.185	2.34857e-182	CA27_dura_inner_skull_14	AC027288.3	NA	NA	NA	NA	NA	NA	NA
CA27	7.18998e-244	-0.271595	0.318	0.532	1.12142e-239	CA27_dura_inner_skull_14	AC046134.2	NA	NA	NA	NA	NA	NA	NA
CA27	1.1674e-227	-0.350215	0.412	0.63	1.8208e-223	CA27_dura_inner_skull_14	AC053527.2	NA	NA	NA	NA	NA	NA	NA
CA27	0	0.510589	0.377	0.135	0	CA27_dura_inner_skull_14	AC064875.1	NA	NA	NA	NA	NA	NA	NA
CA27	5.70319e-292	-0.311372	0.087	0.278	8.89526e-288	CA27_dura_inner_skull_14	AC068756.1	NA	NA	NA	NA	NA	NA	NA
CA27	0	-0.775975	0.003	0.246	0	CA27_dura_inner_skull_14	AC069228.1	NA	NA	NA	NA	NA	NA	NA
CA27	1.89376e-86	-0.260087	0.066	0.151	2.95369e-82	CA27_dura_inner_skull_14	AC073114.1	NA	NA	NA	NA	NA	NA	NA
CA27	1.25235e-247	-0.25619	0.075	0.24	1.95329e-243	CA27_dura_inner_skull_14	AC074032.1	NA	NA	NA	NA	NA	NA	NA
CA27	0	-1.25939	0.159	0.574	0	CA27_dura_inner_skull_14	AC079142.1	NA	NA	NA	NA	NA	NA	NA
CA27	1.59037e-160	-0.330387	0.558	0.713	2.4805e-156	CA27_dura_inner_skull_14	AC079781.5	NA	NA	NA	NA	NA	NA	NA
CA27	6.17775e-155	-0.696953	0.099	0.233	9.63544e-151	CA27_dura_inner_skull_14	AC083837.1	NA	NA	NA	NA	NA	NA	NA
CA27	0	0.71217	0.402	0.088	0	CA27_dura_inner_skull_14	AC090709.1	NA	NA	NA	NA	NA	NA	NA
CA27	3.75454e-176	-0.351885	0.276	0.463	5.85596e-172	CA27_dura_inner_skull_14	AC090796.1	NA	NA	NA	NA	NA	NA	NA
CA27	9.80903e-200	-0.279234	0.143	0.317	1.52991e-195	CA27_dura_inner_skull_14	AC090945.1	NA	NA	NA	NA	NA	NA	NA
CA27	0	1.09522	0.983	0.766	0	CA27_dura_inner_skull_14	AC092691.1	NA	NA	NA	NA	NA	NA	NA
CA27	3.84613e-218	-0.310535	0.17	0.361	5.99881e-214	CA27_dura_inner_skull_14	AC093791.2	NA	NA	NA	NA	NA	NA	NA
CA27	0	-0.575134	0.188	0.447	0	CA27_dura_inner_skull_14	AC093866.1	NA	NA	NA	NA	NA	NA	NA
CA27	7.82611e-220	-0.464153	0.044	0.177	1.22064e-215	CA27_dura_inner_skull_14	AC093916.1	NA	NA	NA	NA	NA	NA	NA
CA27	3.97943e-177	-0.273968	0.018	0.11	6.20672e-173	CA27_dura_inner_skull_14	AC097467.3	NA	NA	NA	NA	NA	NA	NA
CA27	4.5779e-146	-0.358018	0.171	0.322	7.14015e-142	CA27_dura_inner_skull_14	AC098617.1	NA	NA	NA	NA	NA	NA	NA
CA27	1.13318896530148e-319	0.557802	0.648	0.464	1.76743482918072e-315	CA27_dura_inner_skull_14	AC104041.1	NA	NA	NA	NA	NA	NA	NA
CA27	4.29274e-215	-0.32758	0.15	0.335	6.69539e-211	CA27_dura_inner_skull_14	AC104170.1	NA	NA	NA	NA	NA	NA	NA
CA27	1.52579e-285	-0.349039	0.134	0.345	2.37978e-281	CA27_dura_inner_skull_14	AC105285.1	NA	NA	NA	NA	NA	NA	NA
CA27	0	-1.08311	0.317	0.743	0	CA27_dura_inner_skull_14	AC108690.1	NA	NA	NA	NA	NA	NA	NA
CA27	2.1967e-207	0.536275	0.334	0.199	3.4262e-203	CA27_dura_inner_skull_14	AC109466.1	NA	NA	NA	NA	NA	NA	NA
CA27	3.73266e-152	0.382839	0.252	0.141	5.82183e-148	CA27_dura_inner_skull_14	AC114689.3	NA	NA	NA	NA	NA	NA	NA
CA27	0	-0.627572	0.264	0.637	0	CA27_dura_inner_skull_14	AC119673.2	NA	NA	NA	NA	NA	NA	NA
CA27	0	-0.490101	0.1	0.38	0	CA27_dura_inner_skull_14	AC138150.1	NA	NA	NA	NA	NA	NA	NA
CA27	0	-0.690766	0.184	0.57	0	CA27_dura_inner_skull_14	AC139887.2	NA	NA	NA	NA	NA	NA	NA
CA27	1.02562e-282	-0.303862	0.074	0.252	1.59966e-278	CA27_dura_inner_skull_14	AC244033.2	NA	NA	NA	NA	NA	NA	NA
CA27	6.9531e-127	-0.450432	0.346	0.479	1.08447e-122	CA27_dura_inner_skull_14	ACADL	NA	NA	NA	NA	NA	NA	NA
CA27	0	-0.388263	0.932	0.919	0	CA27_dura_inner_skull_14	ACBD6	NA	NA	NA	NA	NA	NA	NA
CA27	2.17524e-230	-0.266669	0.094	0.257	3.39272e-226	CA27_dura_inner_skull_14	ACLY	NA	NA	NA	NA	NA	NA	NA
CA27	0	0.735217	0.462	0.324	0	CA27_dura_inner_skull_14	ACPP	NA	NA	NA	NA	NA	NA	NA
CA27	4.83532e-284	-0.327136	0.317	0.555	7.54164e-280	CA27_dura_inner_skull_14	ACSL1	NA	NA	NA	NA	NA	NA	NA
CA27	4.41487e-208	0.29245	0.291	0.212	6.88588e-204	CA27_dura_inner_skull_14	ACVR2A	NA	NA	NA	NA	NA	NA	NA
CA27	4.09388e-202	-0.269825	0.222	0.411	6.38522e-198	CA27_dura_inner_skull_14	ACYP2	NA	NA	NA	NA	NA	NA	NA
CA27	2.13033e-262	-0.432408	0.243	0.469	3.32268e-258	CA27_dura_inner_skull_14	ADAMTS3	NA	NA	NA	NA	NA	NA	NA
CA27	0	1.45972	0.534	0.09	0	CA27_dura_inner_skull_14	ADAMTSL1	NA	NA	NA	NA	NA	NA	NA
CA27	1.15149e-178	-0.250345	0.104	0.253	1.79598e-174	CA27_dura_inner_skull_14	ADCY9	NA	NA	NA	NA	NA	NA	NA
CA27	6.15666e-260	-0.271652	0.237	0.455	9.60255e-256	CA27_dura_inner_skull_14	ADD1	NA	NA	NA	NA	NA	NA	NA
CA27	1.52871e-218	0.426735	0.346	0.229	2.38433e-214	CA27_dura_inner_skull_14	ADD3	NA	NA	NA	NA	NA	NA	NA
CA27	1.48259e-292	-0.281419	0.215	0.437	2.3124e-288	CA27_dura_inner_skull_14	ADGRA3	NA	NA	NA	NA	NA	NA	NA
CA27	0	1.34184	0.507	0.101	0	CA27_dura_inner_skull_14	ADGRB3	NA	NA	NA	NA	NA	NA	NA
CA27	1.29617e-237	0.405313	0.369	0.287	2.02164e-233	CA27_dura_inner_skull_14	ADGRL2	NA	NA	NA	NA	NA	NA	NA
CA27	2.66496e-230	-0.354769	0.483	0.696	4.15654e-226	CA27_dura_inner_skull_14	ADGRV1	NA	NA	NA	NA	NA	NA	NA
CA27	3.11931e-278	-0.30278	0.893	0.85	4.86518e-274	CA27_dura_inner_skull_14	ADK	NA	NA	NA	NA	NA	NA	NA
CA27	1.51184087627421e-321	0.455038	0.996	0.955	2.35801821472489e-317	CA27_dura_inner_skull_14	AF117829.1	NA	NA	NA	NA	NA	NA	NA
CA27	9.17703e-56	-0.284674	0.52	0.622	1.43134e-51	CA27_dura_inner_skull_14	AFF3	NA	NA	NA	NA	NA	NA	NA
CA27	0	-0.567943	0.931	0.931	0	CA27_dura_inner_skull_14	AGAP1	NA	NA	NA	NA	NA	NA	NA
CA27	0	-0.758258	0.42	0.762	0	CA27_dura_inner_skull_14	AGBL4	NA	NA	NA	NA	NA	NA	NA
CA27	3.71177e-244	-0.268616	0.238	0.449	5.78925e-240	CA27_dura_inner_skull_14	AGK	NA	NA	NA	NA	NA	NA	NA
CA27	0	-0.380817	0.169	0.429	0	CA27_dura_inner_skull_14	AGPAT3	NA	NA	NA	NA	NA	NA	NA
CA27	0	-0.347258	0.301	0.559	0	CA27_dura_inner_skull_14	AIG1	NA	NA	NA	NA	NA	NA	NA
CA27	0	-0.360664	0.232	0.506	0	CA27_dura_inner_skull_14	AK3	NA	NA	NA	NA	NA	NA	NA
CA27	2.23789e-300	-0.265259	0.272	0.504	3.49044e-296	CA27_dura_inner_skull_14	AKAP10	NA	NA	NA	NA	NA	NA	NA
CA27	8.15894e-82	-0.616973	0.474	0.579	1.27255e-77	CA27_dura_inner_skull_14	AKAP12	NA	NA	NA	NA	NA	NA	NA
CA27	0	0.350704	0.933	0.751	0	CA27_dura_inner_skull_14	AKAP9	NA	NA	NA	NA	NA	NA	NA
CA27	5.79045e-305	0.471446	0.258	0.092	9.03137e-301	CA27_dura_inner_skull_14	AL050309.1	NA	NA	NA	NA	NA	NA	NA
CA27	8.49597e-140	0.385641	0.634	0.554	1.32512e-135	CA27_dura_inner_skull_14	AL121790.1	NA	NA	NA	NA	NA	NA	NA
CA27	0	0.649174	0.366	0.114	0	CA27_dura_inner_skull_14	AL135878.1	NA	NA	NA	NA	NA	NA	NA
CA27	6.80996e-240	-0.257576	0.068	0.226	1.06215e-235	CA27_dura_inner_skull_14	AL160314.2	NA	NA	NA	NA	NA	NA	NA
CA27	6.36379e-157	-0.461832	0.266	0.438	9.9256e-153	CA27_dura_inner_skull_14	AL163541.1	NA	NA	NA	NA	NA	NA	NA
CA27	6.08796e-187	-0.316278	0.03	0.14	9.49539e-183	CA27_dura_inner_skull_14	AL353138.1	NA	NA	NA	NA	NA	NA	NA
CA27	0	0.929214	0.798	0.476	0	CA27_dura_inner_skull_14	AL356737.2	NA	NA	NA	NA	NA	NA	NA
CA27	9.07896e-267	-0.308928	0.066	0.237	1.41605e-262	CA27_dura_inner_skull_14	AL357153.2	NA	NA	NA	NA	NA	NA	NA
CA27	1.1739e-152	-0.273833	0.177	0.332	1.83093e-148	CA27_dura_inner_skull_14	AL359232.1	NA	NA	NA	NA	NA	NA	NA
CA27	5.13846e-152	0.310952	0.19	0.088	8.01445e-148	CA27_dura_inner_skull_14	AL445250.1	NA	NA	NA	NA	NA	NA	NA
CA27	5.60129e-217	-0.264988	0.118	0.289	8.73634e-213	CA27_dura_inner_skull_14	AL592183.1	NA	NA	NA	NA	NA	NA	NA
CA27	1.03147e-182	0.266975	0.434	0.423	1.60878e-178	CA27_dura_inner_skull_14	AL645568.1	NA	NA	NA	NA	NA	NA	NA
CA27	4.86015e-204	-0.349747	0.077	0.224	7.58037e-200	CA27_dura_inner_skull_14	ALDH1A2	NA	NA	NA	NA	NA	NA	NA
CA27	0	-0.259061	0.006	0.16	0	CA27_dura_inner_skull_14	ALOX15B	NA	NA	NA	NA	NA	NA	NA
CA27	0	-0.522297	0.16	0.424	0	CA27_dura_inner_skull_14	ALPK1	NA	NA	NA	NA	NA	NA	NA
CA27	0	-0.590652	0.018	0.252	0	CA27_dura_inner_skull_14	AMACR	NA	NA	NA	NA	NA	NA	NA
CA27	6.00926e-267	-0.305525	0.233	0.459	9.37264e-263	CA27_dura_inner_skull_14	AMBRA1	NA	NA	NA	NA	NA	NA	NA
CA27	0	0.719906	0.906	0.559	0	CA27_dura_inner_skull_14	AMD1	NA	NA	NA	NA	NA	NA	NA
CA27	0	0.661634	0.797	0.534	0	CA27_dura_inner_skull_14	AMOTL1	NA	NA	NA	NA	NA	NA	NA
CA27	0	-0.451361	0.236	0.526	0	CA27_dura_inner_skull_14	ANAPC16	NA	NA	NA	NA	NA	NA	NA
CA27	5.1067e-142	-0.457142	0.734	0.79	7.96492e-138	CA27_dura_inner_skull_14	ANKH	NA	NA	NA	NA	NA	NA	NA
CA27	6.09276e-192	-0.257216	0.102	0.258	9.50288e-188	CA27_dura_inner_skull_14	ANKRA2	NA	NA	NA	NA	NA	NA	NA
CA27	0	-0.439762	0.256	0.546	0	CA27_dura_inner_skull_14	ANKRD11	NA	NA	NA	NA	NA	NA	NA
CA27	0	0.492061	0.975	0.798	0	CA27_dura_inner_skull_14	ANKRD12	NA	NA	NA	NA	NA	NA	NA
CA27	1.15396e-164	-0.531026	0.124	0.273	1.79983e-160	CA27_dura_inner_skull_14	ANKRD36C	NA	NA	NA	NA	NA	NA	NA
CA27	0	0.518894	0.365	0.208	0	CA27_dura_inner_skull_14	ANKRD50	NA	NA	NA	NA	NA	NA	NA
CA27	1.68999e-281	-0.338549	0.197	0.423	2.63588e-277	CA27_dura_inner_skull_14	ANO10	NA	NA	NA	NA	NA	NA	NA
CA27	0	0.575911	0.891	0.714	0	CA27_dura_inner_skull_14	ANTXR2	NA	NA	NA	NA	NA	NA	NA
CA27	0	0.307769	0.963	0.775	0	CA27_dura_inner_skull_14	AOPEP	NA	NA	NA	NA	NA	NA	NA
CA27	8.95078e-308	0.439735	0.54	0.41	1.39605e-303	CA27_dura_inner_skull_14	AP001011.1	NA	NA	NA	NA	NA	NA	NA
CA27	1.68421e-259	-0.334064	0.053	0.21	2.62687e-255	CA27_dura_inner_skull_14	AP001042.1	NA	NA	NA	NA	NA	NA	NA
CA27	0	-0.546353	0.282	0.577	0	CA27_dura_inner_skull_14	AP001207.3	NA	NA	NA	NA	NA	NA	NA
CA27	0	-0.408337	0.153	0.414	0	CA27_dura_inner_skull_14	AP002495.1	NA	NA	NA	NA	NA	NA	NA
CA27	9.36184e-164	-0.295266	0.072	0.199	1.46017e-159	CA27_dura_inner_skull_14	APOLD1	NA	NA	NA	NA	NA	NA	NA
CA27	3.62854e-271	-0.301383	0.2	0.422	5.65943e-267	CA27_dura_inner_skull_14	APTX	NA	NA	NA	NA	NA	NA	NA
CA27	1.32439e-84	0.29246	0.675	0.585	2.06565e-80	CA27_dura_inner_skull_14	AR	NA	NA	NA	NA	NA	NA	NA
CA27	8.1192e-293	-0.254498	0.254	0.476	1.26635e-288	CA27_dura_inner_skull_14	ARFGEF2	NA	NA	NA	NA	NA	NA	NA
CA27	2.54997161131584e-318	-0.437374	0.065	0.256	3.97719072216932e-314	CA27_dura_inner_skull_14	ARHGAP18	NA	NA	NA	NA	NA	NA	NA
CA27	1.25841e-307	-0.494017	0.843	0.839	1.96275e-303	CA27_dura_inner_skull_14	ARHGAP26	NA	NA	NA	NA	NA	NA	NA
CA27	4.2566e-256	-0.371128	0.246	0.47	6.63902e-252	CA27_dura_inner_skull_14	ARHGAP29	NA	NA	NA	NA	NA	NA	NA
CA27	0	-0.377326	0.11	0.331	0	CA27_dura_inner_skull_14	ARHGAP44	NA	NA	NA	NA	NA	NA	NA
CA27	0	0.628396	0.999	0.968	0	CA27_dura_inner_skull_14	ARHGAP6	NA	NA	NA	NA	NA	NA	NA
CA27	5.79056e-219	-0.29097	0.124	0.299	9.03154e-215	CA27_dura_inner_skull_14	ARHGEF10	NA	NA	NA	NA	NA	NA	NA
CA27	2.6215e-143	-0.256714	0.181	0.333	4.08875e-139	CA27_dura_inner_skull_14	ARHGEF10L	NA	NA	NA	NA	NA	NA	NA
CA27	9.95048210724271e-321	-0.319412	0.337	0.589	1.55197669426664e-316	CA27_dura_inner_skull_14	ARHGEF11	NA	NA	NA	NA	NA	NA	NA
CA27	0	0.318126	0.964	0.794	0	CA27_dura_inner_skull_14	ARHGEF12	NA	NA	NA	NA	NA	NA	NA
CA27	1.68694e-173	-0.350491	0.168	0.335	2.63112e-169	CA27_dura_inner_skull_14	ARHGEF3	NA	NA	NA	NA	NA	NA	NA
CA27	2.52122e-107	-0.471119	0.483	0.616	3.93235e-103	CA27_dura_inner_skull_14	ARHGEF38	NA	NA	NA	NA	NA	NA	NA
CA27	0	0.400665	1	0.951	0	CA27_dura_inner_skull_14	ARID1B	NA	NA	NA	NA	NA	NA	NA
CA27	0	0.423219	0.896	0.629	0	CA27_dura_inner_skull_14	ARID4B	NA	NA	NA	NA	NA	NA	NA
CA27	1.10762e-182	0.278622	0.81	0.637	1.72755e-178	CA27_dura_inner_skull_14	ARID5B	NA	NA	NA	NA	NA	NA	NA
CA27	0	0.356614	0.965	0.765	0	CA27_dura_inner_skull_14	ARIH1	NA	NA	NA	NA	NA	NA	NA
CA27	7.41083e-261	-0.25975	0.2	0.408	1.15587e-256	CA27_dura_inner_skull_14	ARIH2	NA	NA	NA	NA	NA	NA	NA
CA27	1.02845e-291	-0.305897	0.258	0.493	1.60407e-287	CA27_dura_inner_skull_14	ARMH3	NA	NA	NA	NA	NA	NA	NA
CA27	5.39317e-203	-0.278106	0.157	0.333	8.41172e-199	CA27_dura_inner_skull_14	ARMH4	NA	NA	NA	NA	NA	NA	NA
CA27	1.37232e-191	-0.253883	0.184	0.365	2.1404e-187	CA27_dura_inner_skull_14	ARNT	NA	NA	NA	NA	NA	NA	NA
CA27	2.65562e-186	-0.273319	0.155	0.326	4.14197e-182	CA27_dura_inner_skull_14	ARRB1	NA	NA	NA	NA	NA	NA	NA
CA27	8.41916e-209	-0.325694	0.16	0.344	1.31314e-204	CA27_dura_inner_skull_14	ARRDC3	NA	NA	NA	NA	NA	NA	NA
CA27	6.86602e-308	-0.36541	0.074	0.268	1.07089e-303	CA27_dura_inner_skull_14	ARRDC3-AS1	NA	NA	NA	NA	NA	NA	NA
CA27	0	-0.37535	0.031	0.25	0	CA27_dura_inner_skull_14	ARSG	NA	NA	NA	NA	NA	NA	NA
CA27	2.1762e-161	-0.260397	0.162	0.322	3.39423e-157	CA27_dura_inner_skull_14	ASAP2	NA	NA	NA	NA	NA	NA	NA
CA27	0	0.770837	0.992	0.832	0	CA27_dura_inner_skull_14	ASCC3	NA	NA	NA	NA	NA	NA	NA
CA27	0	-0.992225	0.248	0.709	0	CA27_dura_inner_skull_14	ASPH	NA	NA	NA	NA	NA	NA	NA
CA27	1.61399e-175	-0.350575	0.246	0.429	2.51734e-171	CA27_dura_inner_skull_14	ATAD2	NA	NA	NA	NA	NA	NA	NA
CA27	0	0.346695	0.949	0.763	0	CA27_dura_inner_skull_14	ATF6	NA	NA	NA	NA	NA	NA	NA
CA27	5.19605e-305	-0.370944	0.282	0.532	8.10427e-301	CA27_dura_inner_skull_14	ATF7	NA	NA	NA	NA	NA	NA	NA
CA27	0	-0.408356	0.111	0.336	0	CA27_dura_inner_skull_14	ATP11A	NA	NA	NA	NA	NA	NA	NA
CA27	0	-0.257285	0.306	0.538	4.21724e-305	CA27_dura_inner_skull_14	ATP2A2	NA	NA	NA	NA	NA	NA	NA
CA27	9.04443e-284	-0.274447	0.28	0.507	1.41066e-279	CA27_dura_inner_skull_14	ATP6V1H	NA	NA	NA	NA	NA	NA	NA
CA27	6.42285339593621e-323	0.368138	0.995	0.94	1.00177244416417e-318	CA27_dura_inner_skull_14	ATP8A1	NA	NA	NA	NA	NA	NA	NA
CA27	3.31569591874825e-311	-0.524407	0.148	0.374	5.17149e-307	CA27_dura_inner_skull_14	ATP8A2	NA	NA	NA	NA	NA	NA	NA
CA27	5.87513e-273	-0.294102	0.176	0.39	9.16344e-269	CA27_dura_inner_skull_14	ATR	NA	NA	NA	NA	NA	NA	NA
CA27	6.10163e-255	0.257709	0.861	0.662	9.51672e-251	CA27_dura_inner_skull_14	ATRX	NA	NA	NA	NA	NA	NA	NA
CA27	0	0.728767	0.96	0.622	0	CA27_dura_inner_skull_14	AUTS2	NA	NA	NA	NA	NA	NA	NA
CA27	0	-0.462198	0.137	0.399	0	CA27_dura_inner_skull_14	AZIN1-AS1	NA	NA	NA	NA	NA	NA	NA
CA27	2.73599e-167	-0.270863	0.115	0.262	4.26732e-163	CA27_dura_inner_skull_14	B4GALT1	NA	NA	NA	NA	NA	NA	NA
CA27	0	-0.817955	0.73	0.865	0	CA27_dura_inner_skull_14	BACE2	NA	NA	NA	NA	NA	NA	NA
CA27	6.45514e-302	-0.531325	0.166	0.393	1.00681e-297	CA27_dura_inner_skull_14	BACH2	NA	NA	NA	NA	NA	NA	NA
CA27	0	-0.384267	0.043	0.23	0	CA27_dura_inner_skull_14	BANK1	NA	NA	NA	NA	NA	NA	NA
CA27	2.47068e-252	-0.346402	0.138	0.336	3.85352e-248	CA27_dura_inner_skull_14	BANP	NA	NA	NA	NA	NA	NA	NA
CA27	0	-0.711656	0.138	0.41	0	CA27_dura_inner_skull_14	BASP1-AS1	NA	NA	NA	NA	NA	NA	NA
CA27	0	0.486777	0.692	0.497	1.11642e-304	CA27_dura_inner_skull_14	BAZ2B	NA	NA	NA	NA	NA	NA	NA
CA27	5.18852e-290	-0.276472	0.035	0.188	8.09254e-286	CA27_dura_inner_skull_14	BBOF1	NA	NA	NA	NA	NA	NA	NA
CA27	5.10033e-214	0.436054	0.747	0.586	7.95498e-210	CA27_dura_inner_skull_14	BBS9	NA	NA	NA	NA	NA	NA	NA
CA27	4.85997e-128	0.289173	0.805	0.668	7.5801e-124	CA27_dura_inner_skull_14	BBX	NA	NA	NA	NA	NA	NA	NA
CA27	6.36383e-241	-0.365285	0.089	0.263	9.92567e-237	CA27_dura_inner_skull_14	BCL2	NA	NA	NA	NA	NA	NA	NA
CA27	3.2609e-244	-0.386792	0.129	0.316	5.08603e-240	CA27_dura_inner_skull_14	BCL6	NA	NA	NA	NA	NA	NA	NA
CA27	0	-0.472591	0.168	0.414	0	CA27_dura_inner_skull_14	BICD1	NA	NA	NA	NA	NA	NA	NA
CA27	0	-0.388858	0.252	0.518	0	CA27_dura_inner_skull_14	BICRAL	NA	NA	NA	NA	NA	NA	NA
CA27	1.31529e-197	-0.271052	0.062	0.194	2.05145e-193	CA27_dura_inner_skull_14	BLCAP	NA	NA	NA	NA	NA	NA	NA
CA27	3.31748e-262	-0.329787	0.102	0.288	5.17427e-258	CA27_dura_inner_skull_14	BMERB1	NA	NA	NA	NA	NA	NA	NA
CA27	0	-0.387413	0.289	0.568	0	CA27_dura_inner_skull_14	BMPR1A	NA	NA	NA	NA	NA	NA	NA
CA27	9.58279e-224	0.322221	1	0.971	1.49463e-219	CA27_dura_inner_skull_14	BMPR1B	NA	NA	NA	NA	NA	NA	NA
CA27	0	0.704316	0.327	0.072	0	CA27_dura_inner_skull_14	BNC2	NA	NA	NA	NA	NA	NA	NA
CA27	5.90381e-238	-0.455289	0.159	0.355	9.20817e-234	CA27_dura_inner_skull_14	BORCS5	NA	NA	NA	NA	NA	NA	NA
CA27	0	0.491877	0.998	0.934	0	CA27_dura_inner_skull_14	BRAF	NA	NA	NA	NA	NA	NA	NA
CA27	0	-0.391354	0.117	0.363	0	CA27_dura_inner_skull_14	BRI3	NA	NA	NA	NA	NA	NA	NA
CA27	8.93712e-165	-0.314188	0.09	0.228	1.39392e-160	CA27_dura_inner_skull_14	BRIP1	NA	NA	NA	NA	NA	NA	NA
CA27	0	0.33025	0.879	0.659	0	CA27_dura_inner_skull_14	BRWD1	NA	NA	NA	NA	NA	NA	NA
CA27	0	-0.397556	0.13	0.37	0	CA27_dura_inner_skull_14	BTBD3	NA	NA	NA	NA	NA	NA	NA
CA27	1.12459e-134	-0.411203	0.035	0.125	1.75402e-130	CA27_dura_inner_skull_14	BX284613.2	NA	NA	NA	NA	NA	NA	NA
CA27	1.93698e-238	-0.303975	0.205	0.413	3.0211e-234	CA27_dura_inner_skull_14	C11orf49	NA	NA	NA	NA	NA	NA	NA
CA27	2.66701e-277	-0.267417	0.064	0.235	4.15973e-273	CA27_dura_inner_skull_14	C14orf93	NA	NA	NA	NA	NA	NA	NA
CA27	7.46421e-232	0.36995	0.991	0.919	1.16419e-227	CA27_dura_inner_skull_14	C1orf21	NA	NA	NA	NA	NA	NA	NA
CA27	0	-0.378926	0.143	0.381	0	CA27_dura_inner_skull_14	C1orf43	NA	NA	NA	NA	NA	NA	NA
CA27	0	0.935029	0.921	0.567	0	CA27_dura_inner_skull_14	C2orf27A	NA	NA	NA	NA	NA	NA	NA
CA27	0	-0.459856	0.069	0.34	0	CA27_dura_inner_skull_14	C5orf56	NA	NA	NA	NA	NA	NA	NA
CA27	1.30076e-204	-0.265474	0.148	0.323	2.0288e-200	CA27_dura_inner_skull_14	C5orf66	NA	NA	NA	NA	NA	NA	NA
CA27	0	-0.418822	0.293	0.59	0	CA27_dura_inner_skull_14	C7orf50	NA	NA	NA	NA	NA	NA	NA
CA27	1.72185e-121	-0.394607	0.871	0.818	2.68557e-117	CA27_dura_inner_skull_14	CACNA1D	NA	NA	NA	NA	NA	NA	NA
CA27	0	0.942134	0.556	0.212	0	CA27_dura_inner_skull_14	CACNA2D1	NA	NA	NA	NA	NA	NA	NA
CA27	8.78435e-125	0.342078	0.712	0.599	1.37009e-120	CA27_dura_inner_skull_14	CADM1	NA	NA	NA	NA	NA	NA	NA
CA27	1.24512e-180	-0.43885	0.994	0.968	1.94201e-176	CA27_dura_inner_skull_14	CAMK2D	NA	NA	NA	NA	NA	NA	NA
CA27	0	-0.560905	0.111	0.427	0	CA27_dura_inner_skull_14	CAMKK2	NA	NA	NA	NA	NA	NA	NA
CA27	5.5838e-279	-0.337197	0.165	0.38	8.70906e-275	CA27_dura_inner_skull_14	CANX	NA	NA	NA	NA	NA	NA	NA
CA27	1.22799e-217	-0.2738	0.161	0.349	1.9153e-213	CA27_dura_inner_skull_14	CAPZA1	NA	NA	NA	NA	NA	NA	NA
CA27	5.72371e-280	-0.336637	0.055	0.217	8.92727e-276	CA27_dura_inner_skull_14	CASC19	NA	NA	NA	NA	NA	NA	NA
CA27	0	-0.366344	0.064	0.261	0	CA27_dura_inner_skull_14	CASC2	NA	NA	NA	NA	NA	NA	NA
CA27	1.96842e-201	-0.267702	0.214	0.403	3.07015e-197	CA27_dura_inner_skull_14	CASZ1	NA	NA	NA	NA	NA	NA	NA
CA27	0	-1.81258	0.299	0.841	0	CA27_dura_inner_skull_14	CATSPERB	NA	NA	NA	NA	NA	NA	NA
CA27	0	-0.504452	0.167	0.435	0	CA27_dura_inner_skull_14	CBR3	NA	NA	NA	NA	NA	NA	NA
CA27	0	-0.712295	0.356	0.72	0	CA27_dura_inner_skull_14	CBR3-AS1	NA	NA	NA	NA	NA	NA	NA
CA27	0	-0.454169	0.221	0.514	0	CA27_dura_inner_skull_14	CCDC125	NA	NA	NA	NA	NA	NA	NA
CA27	0	-0.409186	0.112	0.357	0	CA27_dura_inner_skull_14	CCDC18-AS1	NA	NA	NA	NA	NA	NA	NA
CA27	0	-0.563486	0.125	0.397	0	CA27_dura_inner_skull_14	CCDC50	NA	NA	NA	NA	NA	NA	NA
CA27	0	-0.662272	0.203	0.601	0	CA27_dura_inner_skull_14	CCDC57	NA	NA	NA	NA	NA	NA	NA
CA27	8.93161e-221	-0.261867	0.087	0.249	1.39306e-216	CA27_dura_inner_skull_14	CCDC85C	NA	NA	NA	NA	NA	NA	NA
CA27	2.82563e-177	-0.265178	0.094	0.24	4.40714e-173	CA27_dura_inner_skull_14	CCNG2	NA	NA	NA	NA	NA	NA	NA
CA27	2.56494e-133	0.294141	0.829	0.713	4.00053e-129	CA27_dura_inner_skull_14	CCNH	NA	NA	NA	NA	NA	NA	NA
CA27	1.93852e-307	-0.336352	0.196	0.434	3.02351e-303	CA27_dura_inner_skull_14	CCNI	NA	NA	NA	NA	NA	NA	NA
CA27	1.7072e-288	-0.313657	0.258	0.491	2.66273e-284	CA27_dura_inner_skull_14	CCSER2	NA	NA	NA	NA	NA	NA	NA
CA27	0	-0.483066	0.158	0.445	0	CA27_dura_inner_skull_14	CCT3	NA	NA	NA	NA	NA	NA	NA
CA27	0	0.400107	0.991	0.905	0	CA27_dura_inner_skull_14	CD2AP	NA	NA	NA	NA	NA	NA	NA
CA27	1.20947e-187	-0.257411	0.905	0.863	1.8864e-183	CA27_dura_inner_skull_14	CD46	NA	NA	NA	NA	NA	NA	NA
CA27	2.0871e-222	-0.260596	0.091	0.255	3.25526e-218	CA27_dura_inner_skull_14	CD99L2	NA	NA	NA	NA	NA	NA	NA
CA27	0	-0.772276	0.434	0.698	0	CA27_dura_inner_skull_14	CDC14A	NA	NA	NA	NA	NA	NA	NA
CA27	0	0.787103	0.831	0.532	0	CA27_dura_inner_skull_14	CDC14B	NA	NA	NA	NA	NA	NA	NA
CA27	9.87855e-217	0.390173	0.619	0.486	1.54076e-212	CA27_dura_inner_skull_14	CDC42BPA	NA	NA	NA	NA	NA	NA	NA
CA27	0	-0.881923	0.14	0.578	0	CA27_dura_inner_skull_14	CDH26	NA	NA	NA	NA	NA	NA	NA
CA27	4.02896e-233	-0.276181	0.131	0.315	6.28397e-229	CA27_dura_inner_skull_14	CDK12	NA	NA	NA	NA	NA	NA	NA
CA27	1.78455e-266	0.297634	0.997	0.945	2.78336e-262	CA27_dura_inner_skull_14	CDK14	NA	NA	NA	NA	NA	NA	NA
CA27	0	0.442871	0.948	0.737	0	CA27_dura_inner_skull_14	CDK19	NA	NA	NA	NA	NA	NA	NA
CA27	1.99939e-267	-0.326691	0.38	0.612	3.11845e-263	CA27_dura_inner_skull_14	CDK8	NA	NA	NA	NA	NA	NA	NA
CA27	1.94867e-245	-0.269689	0.089	0.262	3.03934e-241	CA27_dura_inner_skull_14	CDKL3	NA	NA	NA	NA	NA	NA	NA
CA27	4.30873e-213	-0.263355	0.114	0.285	6.72033e-209	CA27_dura_inner_skull_14	CDKN2A	NA	NA	NA	NA	NA	NA	NA
CA27	5.28168e-249	-0.322857	0.147	0.345	8.23783e-245	CA27_dura_inner_skull_14	CDR2	NA	NA	NA	NA	NA	NA	NA
CA27	0	-0.439573	0.29	0.563	0	CA27_dura_inner_skull_14	CDYL	NA	NA	NA	NA	NA	NA	NA
CA27	2.18254e-264	0.514994	0.731	0.533	3.4041e-260	CA27_dura_inner_skull_14	CDYL2	NA	NA	NA	NA	NA	NA	NA
CA27	4.12456e-305	-0.295147	0.184	0.41	6.43308e-301	CA27_dura_inner_skull_14	CELF1	NA	NA	NA	NA	NA	NA	NA
CA27	1.91306e-194	-0.272003	0.081	0.229	2.9838e-190	CA27_dura_inner_skull_14	CENPK	NA	NA	NA	NA	NA	NA	NA
CA27	8.42686e-145	-0.307963	0.398	0.568	1.31434e-140	CA27_dura_inner_skull_14	CENPP	NA	NA	NA	NA	NA	NA	NA
CA27	0	-0.483316	0.154	0.44	0	CA27_dura_inner_skull_14	CEP112	NA	NA	NA	NA	NA	NA	NA
CA27	0	-0.70478	0.188	0.558	0	CA27_dura_inner_skull_14	CERS4	NA	NA	NA	NA	NA	NA	NA
CA27	0	-0.348061	0.094	0.318	0	CA27_dura_inner_skull_14	CERS5	NA	NA	NA	NA	NA	NA	NA
CA27	0	1.02369	0.988	0.685	0	CA27_dura_inner_skull_14	CERS6	NA	NA	NA	NA	NA	NA	NA
CA27	1.38568e-247	-0.290225	0.153	0.352	2.16124e-243	CA27_dura_inner_skull_14	CHCHD6	NA	NA	NA	NA	NA	NA	NA
CA27	1.66221e-248	0.520323	0.281	0.159	2.59256e-244	CA27_dura_inner_skull_14	CHN1	NA	NA	NA	NA	NA	NA	NA
CA27	4.31573e-276	-0.292599	0.217	0.436	6.73125e-272	CA27_dura_inner_skull_14	CHPT1	NA	NA	NA	NA	NA	NA	NA
CA27	5.64106e-301	-0.394548	0.208	0.446	8.79837e-297	CA27_dura_inner_skull_14	CHSY1	NA	NA	NA	NA	NA	NA	NA
CA27	1.11069e-219	-0.271501	0.131	0.307	1.73234e-215	CA27_dura_inner_skull_14	CLASRP	NA	NA	NA	NA	NA	NA	NA
CA27	1.81438881187957e-314	-0.356751	0.217	0.463	2.82990222988857e-310	CA27_dura_inner_skull_14	CLEC16A	NA	NA	NA	NA	NA	NA	NA
CA27	0	-0.520827	0.294	0.616	0	CA27_dura_inner_skull_14	CLIP1	NA	NA	NA	NA	NA	NA	NA
CA27	5.58547e-256	-0.270388	0.085	0.261	8.71165e-252	CA27_dura_inner_skull_14	CLNS1A	NA	NA	NA	NA	NA	NA	NA
CA27	0	-0.381915	0.355	0.632	0	CA27_dura_inner_skull_14	CMC1	NA	NA	NA	NA	NA	NA	NA
CA27	5.05076e-281	-0.404218	0.147	0.361	7.87767e-277	CA27_dura_inner_skull_14	CMTM8	NA	NA	NA	NA	NA	NA	NA
CA27	0	-1.0537	0.12	0.469	0	CA27_dura_inner_skull_14	CNKSR3	NA	NA	NA	NA	NA	NA	NA
CA27	2.52645e-206	-0.336663	0.147	0.326	3.94051e-202	CA27_dura_inner_skull_14	CNNM2	NA	NA	NA	NA	NA	NA	NA
CA27	0	0.256933	0.927	0.722	0	CA27_dura_inner_skull_14	CNOT4	NA	NA	NA	NA	NA	NA	NA
CA27	1.95751e-306	-0.349532	0.263	0.51	3.05313e-302	CA27_dura_inner_skull_14	CNST	NA	NA	NA	NA	NA	NA	NA
CA27	3.15028e-206	0.281675	0.325	0.284	4.91349e-202	CA27_dura_inner_skull_14	CNTN3	NA	NA	NA	NA	NA	NA	NA
CA27	0	1.71623	0.927	0.569	0	CA27_dura_inner_skull_14	CNTNAP2	NA	NA	NA	NA	NA	NA	NA
CA27	4.23819e-197	0.397545	0.619	0.494	6.6103e-193	CA27_dura_inner_skull_14	COBL	NA	NA	NA	NA	NA	NA	NA
CA27	1.77738e-246	-0.318808	0.097	0.276	2.77218e-242	CA27_dura_inner_skull_14	COL28A1	NA	NA	NA	NA	NA	NA	NA
CA27	2.16121e-299	0.327688	0.983	0.854	3.37084e-295	CA27_dura_inner_skull_14	COLEC12	NA	NA	NA	NA	NA	NA	NA
CA27	8.14144e-243	0.291822	0.99	0.908	1.26982e-238	CA27_dura_inner_skull_14	COMMD10	NA	NA	NA	NA	NA	NA	NA
CA27	0	-0.511596	0.07	0.333	0	CA27_dura_inner_skull_14	COMT	NA	NA	NA	NA	NA	NA	NA
CA27	0	-0.352959	0.992	0.976	0	CA27_dura_inner_skull_14	COP1	NA	NA	NA	NA	NA	NA	NA
CA27	1.92101e-197	-0.26041	0.17	0.345	2.99619e-193	CA27_dura_inner_skull_14	COX10-AS1	NA	NA	NA	NA	NA	NA	NA
CA27	1.08927e-257	0.375427	0.955	0.81	1.69893e-253	CA27_dura_inner_skull_14	CPE	NA	NA	NA	NA	NA	NA	NA
CA27	3.50972178105757e-311	0.405658	0.45	0.35	5.47411e-307	CA27_dura_inner_skull_14	CPEB4	NA	NA	NA	NA	NA	NA	NA
CA27	0	-0.341728	0.288	0.543	0	CA27_dura_inner_skull_14	CPLANE1	NA	NA	NA	NA	NA	NA	NA
CA27	0	0.480782	1	0.959	0	CA27_dura_inner_skull_14	CPNE4	NA	NA	NA	NA	NA	NA	NA
CA27	0	-0.411082	0.056	0.273	0	CA27_dura_inner_skull_14	CREB3L1	NA	NA	NA	NA	NA	NA	NA
CA27	6.93481e-281	-0.276206	0.074	0.253	1.08162e-276	CA27_dura_inner_skull_14	CRLF3	NA	NA	NA	NA	NA	NA	NA
CA27	1.72922976044436e-322	-0.328981	0.116	0.336	2.69707965736507e-318	CA27_dura_inner_skull_14	CRLS1	NA	NA	NA	NA	NA	NA	NA
CA27	0	-0.364655	0.156	0.394	0	CA27_dura_inner_skull_14	CRTC3	NA	NA	NA	NA	NA	NA	NA
CA27	1.34422e-227	0.308124	0.356	0.314	2.09657e-223	CA27_dura_inner_skull_14	CRY1	NA	NA	NA	NA	NA	NA	NA
CA27	4.01984e-279	0.421523	0.378	0.303	6.26975e-275	CA27_dura_inner_skull_14	CRYBG1	NA	NA	NA	NA	NA	NA	NA
CA27	4.89464e-257	-0.497532	0.373	0.603	7.63417e-253	CA27_dura_inner_skull_14	CSGALNACT1	NA	NA	NA	NA	NA	NA	NA
CA27	1.83796e-269	-0.253169	0.227	0.44	2.86666e-265	CA27_dura_inner_skull_14	CSNK2A1	NA	NA	NA	NA	NA	NA	NA
CA27	0	0.661367	1	0.941	0	CA27_dura_inner_skull_14	CTNND2	NA	NA	NA	NA	NA	NA	NA
CA27	2.0192e-272	0.34298	0.738	0.516	3.14934e-268	CA27_dura_inner_skull_14	CUL3	NA	NA	NA	NA	NA	NA	NA
CA27	1.07806e-170	-0.345902	0.141	0.29	1.68145e-166	CA27_dura_inner_skull_14	CXADR	NA	NA	NA	NA	NA	NA	NA
CA27	1.51095007591476e-317	-0.33412	0.086	0.285	2.35662883340426e-313	CA27_dura_inner_skull_14	CYFIP2	NA	NA	NA	NA	NA	NA	NA
CA27	9.78659e-236	-0.319026	0.089	0.26	1.52642e-231	CA27_dura_inner_skull_14	CYP1B1-AS1	NA	NA	NA	NA	NA	NA	NA
CA27	0	-0.808815	0.016	0.334	0	CA27_dura_inner_skull_14	CYP4X1	NA	NA	NA	NA	NA	NA	NA
CA27	0	1.16397	0.988	0.65	0	CA27_dura_inner_skull_14	DACH1	NA	NA	NA	NA	NA	NA	NA
CA27	0	-0.423111	0.332	0.611	0	CA27_dura_inner_skull_14	DAP3	NA	NA	NA	NA	NA	NA	NA
CA27	2.01934e-233	0.277595	0.995	0.926	3.14956e-229	CA27_dura_inner_skull_14	DCAF6	NA	NA	NA	NA	NA	NA	NA
CA27	0	-0.397713	0.177	0.448	0	CA27_dura_inner_skull_14	DCAF8	NA	NA	NA	NA	NA	NA	NA
CA27	0	-0.494272	0.121	0.415	0	CA27_dura_inner_skull_14	DCAKD	NA	NA	NA	NA	NA	NA	NA
CA27	1.06805e-240	-0.282238	0.146	0.342	1.66583e-236	CA27_dura_inner_skull_14	DDX46	NA	NA	NA	NA	NA	NA	NA
CA27	1.18654e-196	-0.260708	0.132	0.295	1.85064e-192	CA27_dura_inner_skull_14	DDX50	NA	NA	NA	NA	NA	NA	NA
CA27	3.58589e-254	-0.251264	0.196	0.397	5.59292e-250	CA27_dura_inner_skull_14	DEK	NA	NA	NA	NA	NA	NA	NA
CA27	6.18295e-117	-0.261579	0.78	0.814	9.64355e-113	CA27_dura_inner_skull_14	DENND1B	NA	NA	NA	NA	NA	NA	NA
CA27	2.66898e-167	0.295223	0.686	0.517	4.16281e-163	CA27_dura_inner_skull_14	DENND4C	NA	NA	NA	NA	NA	NA	NA
CA27	0	-0.396006	0.148	0.431	0	CA27_dura_inner_skull_14	DENR	NA	NA	NA	NA	NA	NA	NA
CA27	1.25204e-268	-0.33651	0.275	0.507	1.9528e-264	CA27_dura_inner_skull_14	DHRSX	NA	NA	NA	NA	NA	NA	NA
CA27	0	-0.426587	0.188	0.473	0	CA27_dura_inner_skull_14	DHX32	NA	NA	NA	NA	NA	NA	NA
CA27	1.43193e-245	-0.262906	0.089	0.259	2.23339e-241	CA27_dura_inner_skull_14	DHX34	NA	NA	NA	NA	NA	NA	NA
CA27	0	0.365388	0.934	0.752	0	CA27_dura_inner_skull_14	DIAPH2	NA	NA	NA	NA	NA	NA	NA
CA27	1.4351e-90	-0.251193	0.632	0.739	2.23832e-86	CA27_dura_inner_skull_14	DICER1	NA	NA	NA	NA	NA	NA	NA
CA27	0	-0.287692	0.262	0.507	0	CA27_dura_inner_skull_14	DIDO1	NA	NA	NA	NA	NA	NA	NA
CA27	1.18753e-292	-0.353287	0.231	0.468	1.85219e-288	CA27_dura_inner_skull_14	DLG5	NA	NA	NA	NA	NA	NA	NA
CA27	0	0.770584	0.938	0.648	0	CA27_dura_inner_skull_14	DLGAP1	NA	NA	NA	NA	NA	NA	NA
CA27	1.40836e-222	-0.321209	0.194	0.393	2.19662e-218	CA27_dura_inner_skull_14	DLGAP4	NA	NA	NA	NA	NA	NA	NA
CA27	1.1606e-191	-0.423804	0.495	0.686	1.81019e-187	CA27_dura_inner_skull_14	DNAJC1	NA	NA	NA	NA	NA	NA	NA
CA27	0	-0.408643	0.04	0.231	0	CA27_dura_inner_skull_14	DNAJC12	NA	NA	NA	NA	NA	NA	NA
CA27	1.32841e-278	-0.29535	0.279	0.507	2.07193e-274	CA27_dura_inner_skull_14	DNAJC3	NA	NA	NA	NA	NA	NA	NA
CA27	0	-0.512985	0.219	0.538	0	CA27_dura_inner_skull_14	DNAJC5	NA	NA	NA	NA	NA	NA	NA
CA27	0	-0.424681	0.14	0.396	0	CA27_dura_inner_skull_14	DNASE1	NA	NA	NA	NA	NA	NA	NA
CA27	0	-0.360925	0.091	0.299	0	CA27_dura_inner_skull_14	DNM1	NA	NA	NA	NA	NA	NA	NA
CA27	3.72284e-241	-0.3124	0.147	0.341	5.80651e-237	CA27_dura_inner_skull_14	DNM2	NA	NA	NA	NA	NA	NA	NA
CA27	0	0.483395	0.94	0.645	0	CA27_dura_inner_skull_14	DOCK4	NA	NA	NA	NA	NA	NA	NA
CA27	1.80156e-208	-0.250245	0.222	0.413	2.80989e-204	CA27_dura_inner_skull_14	DOCK5	NA	NA	NA	NA	NA	NA	NA
CA27	1.82866047166991e-318	-0.734831	0.236	0.465	2.85216173766356e-314	CA27_dura_inner_skull_14	DOCK8	NA	NA	NA	NA	NA	NA	NA
CA27	9.51891e-236	-0.26043	0.258	0.463	1.48466e-231	CA27_dura_inner_skull_14	DOCK9	NA	NA	NA	NA	NA	NA	NA
CA27	1.19983089630568e-315	-0.388745	0.192	0.433	1.87137624896797e-311	CA27_dura_inner_skull_14	DOP1B	NA	NA	NA	NA	NA	NA	NA
CA27	1.76047e-283	-0.341184	0.259	0.492	2.74581e-279	CA27_dura_inner_skull_14	DPH6	NA	NA	NA	NA	NA	NA	NA
CA27	1.02603e-194	-0.349995	0.023	0.126	1.6003e-190	CA27_dura_inner_skull_14	DPP6	NA	NA	NA	NA	NA	NA	NA
CA27	2.41536e-265	-0.400311	0.387	0.622	3.76724e-261	CA27_dura_inner_skull_14	DPY19L2	NA	NA	NA	NA	NA	NA	NA
CA27	1.85735e-154	-0.379052	0.256	0.428	2.89692e-150	CA27_dura_inner_skull_14	DPYSL3	NA	NA	NA	NA	NA	NA	NA
CA27	0	-1.0215	0.353	0.777	0	CA27_dura_inner_skull_14	DRAIC	NA	NA	NA	NA	NA	NA	NA
CA27	0	-0.518977	0.199	0.532	0	CA27_dura_inner_skull_14	DROSHA	NA	NA	NA	NA	NA	NA	NA
CA27	0	-0.661174	0.065	0.344	0	CA27_dura_inner_skull_14	DSCAM	NA	NA	NA	NA	NA	NA	NA
CA27	0	-0.918754	0.021	0.404	0	CA27_dura_inner_skull_14	DSCAM-AS1	NA	NA	NA	NA	NA	NA	NA
CA27	2.52653e-164	-0.257436	0.101	0.243	3.94062e-160	CA27_dura_inner_skull_14	DST	NA	NA	NA	NA	NA	NA	NA
CA27	8.74671e-241	-0.300564	0.196	0.402	1.36423e-236	CA27_dura_inner_skull_14	DTNBP1	NA	NA	NA	NA	NA	NA	NA
CA27	0	0.286257	0.946	0.759	0	CA27_dura_inner_skull_14	DUSP16	NA	NA	NA	NA	NA	NA	NA
CA27	0	0.55974	0.995	0.887	0	CA27_dura_inner_skull_14	DYRK1A	NA	NA	NA	NA	NA	NA	NA
CA27	0	-0.32996	0.2	0.44	0	CA27_dura_inner_skull_14	E2F3	NA	NA	NA	NA	NA	NA	NA
CA27	5.20602e-100	0.419433	0.402	0.274	8.11982e-96	CA27_dura_inner_skull_14	EBF1	NA	NA	NA	NA	NA	NA	NA
CA27	1.32639e-252	-0.288546	0.121	0.309	2.06877e-248	CA27_dura_inner_skull_14	ECHDC2	NA	NA	NA	NA	NA	NA	NA
CA27	0	0.580186	0.967	0.704	0	CA27_dura_inner_skull_14	ECPAS	NA	NA	NA	NA	NA	NA	NA
CA27	0	0.855514	0.994	0.851	0	CA27_dura_inner_skull_14	EDA	NA	NA	NA	NA	NA	NA	NA
CA27	1.74291e-262	-0.291151	0.114	0.308	2.71842e-258	CA27_dura_inner_skull_14	EEF1AKMT2	NA	NA	NA	NA	NA	NA	NA
CA27	0	-0.383142	0.115	0.351	0	CA27_dura_inner_skull_14	EEF1D	NA	NA	NA	NA	NA	NA	NA
CA27	0	-0.358074	0.281	0.537	0	CA27_dura_inner_skull_14	EEFSEC	NA	NA	NA	NA	NA	NA	NA
CA27	4.3493e-264	-0.538218	0.41	0.644	6.78361e-260	CA27_dura_inner_skull_14	EEPD1	NA	NA	NA	NA	NA	NA	NA
CA27	6.93498e-186	0.27124	0.26	0.235	1.08165e-181	CA27_dura_inner_skull_14	EFCAB11	NA	NA	NA	NA	NA	NA	NA
CA27	6.64593623845498e-316	-0.419782	0.245	0.495	1.03656667511182e-311	CA27_dura_inner_skull_14	EFCAB2	NA	NA	NA	NA	NA	NA	NA
CA27	0	0.457999	0.94	0.761	0	CA27_dura_inner_skull_14	EGFR	NA	NA	NA	NA	NA	NA	NA
CA27	6.71261e-273	-0.345332	0.153	0.365	1.04697e-268	CA27_dura_inner_skull_14	EHF	NA	NA	NA	NA	NA	NA	NA
CA27	5.59807e-219	-0.265177	0.141	0.324	8.73131e-215	CA27_dura_inner_skull_14	EIF2S2	NA	NA	NA	NA	NA	NA	NA
CA27	2.0789e-270	-0.262576	0.057	0.222	3.24246e-266	CA27_dura_inner_skull_14	EIPR1	NA	NA	NA	NA	NA	NA	NA
CA27	7.62476e-161	-0.339652	0.245	0.419	1.18923e-156	CA27_dura_inner_skull_14	ELK4	NA	NA	NA	NA	NA	NA	NA
CA27	7.97474e-270	0.301416	0.998	0.946	1.24382e-265	CA27_dura_inner_skull_14	ELL2	NA	NA	NA	NA	NA	NA	NA
CA27	9.97775e-276	-0.375414	0.17	0.388	1.55623e-271	CA27_dura_inner_skull_14	ELOVL6	NA	NA	NA	NA	NA	NA	NA
CA27	3.70481e-251	-0.303323	0.143	0.342	5.7784e-247	CA27_dura_inner_skull_14	EMB	NA	NA	NA	NA	NA	NA	NA
CA27	0	-0.329426	0.052	0.248	0	CA27_dura_inner_skull_14	EML1	NA	NA	NA	NA	NA	NA	NA
CA27	0	0.477773	0.345	0.221	0	CA27_dura_inner_skull_14	EML5	NA	NA	NA	NA	NA	NA	NA
CA27	0	-0.587482	0.333	0.664	0	CA27_dura_inner_skull_14	ENSA	NA	NA	NA	NA	NA	NA	NA
CA27	0	-0.511932	0.07	0.329	0	CA27_dura_inner_skull_14	ENTPD5	NA	NA	NA	NA	NA	NA	NA
CA27	0	-0.303557	0.309	0.567	0	CA27_dura_inner_skull_14	EP400	NA	NA	NA	NA	NA	NA	NA
CA27	2.29236e-214	-0.263652	0.121	0.295	3.5754e-210	CA27_dura_inner_skull_14	EPB41	NA	NA	NA	NA	NA	NA	NA
CA27	0	0.997444	0.553	0.265	0	CA27_dura_inner_skull_14	EPHA5	NA	NA	NA	NA	NA	NA	NA
CA27	0	0.434139	1	0.989	0	CA27_dura_inner_skull_14	EPHA6	NA	NA	NA	NA	NA	NA	NA
CA27	0	-0.378309	0.243	0.521	0	CA27_dura_inner_skull_14	EPN2	NA	NA	NA	NA	NA	NA	NA
CA27	0	0.38748	0.849	0.564	0	CA27_dura_inner_skull_14	ERC1	NA	NA	NA	NA	NA	NA	NA
CA27	0	-0.452798	0.292	0.562	0	CA27_dura_inner_skull_14	ERGIC1	NA	NA	NA	NA	NA	NA	NA
CA27	0	-0.383833	0.18	0.442	0	CA27_dura_inner_skull_14	ERI3	NA	NA	NA	NA	NA	NA	NA
CA27	3.72707e-228	-0.284057	0.131	0.311	5.81311e-224	CA27_dura_inner_skull_14	ERICH1	NA	NA	NA	NA	NA	NA	NA
CA27	3.35153e-49	-0.26407	0.291	0.387	5.22738e-45	CA27_dura_inner_skull_14	ERO1A	NA	NA	NA	NA	NA	NA	NA
CA27	0	-0.370026	0.181	0.423	0	CA27_dura_inner_skull_14	ESRP1	NA	NA	NA	NA	NA	NA	NA
CA27	6.77124e-206	0.360306	0.341	0.315	1.05611e-201	CA27_dura_inner_skull_14	ESRRG	NA	NA	NA	NA	NA	NA	NA
CA27	1.43442e-300	-0.418783	0.258	0.504	2.23727e-296	CA27_dura_inner_skull_14	ETS2	NA	NA	NA	NA	NA	NA	NA
CA27	1.88136e-223	-0.290342	0.187	0.385	2.93436e-219	CA27_dura_inner_skull_14	EXOC2	NA	NA	NA	NA	NA	NA	NA
CA27	2.73283e-212	-0.325844	0.257	0.46	4.26239e-208	CA27_dura_inner_skull_14	EYA2	NA	NA	NA	NA	NA	NA	NA
CA27	5.77009e-265	-0.605651	0.402	0.629	8.99961e-261	CA27_dura_inner_skull_14	FAAH2	NA	NA	NA	NA	NA	NA	NA
CA27	0	0.693189	0.988	0.836	0	CA27_dura_inner_skull_14	FAM110B	NA	NA	NA	NA	NA	NA	NA
CA27	1.65342e-232	0.284415	0.783	0.579	2.57884e-228	CA27_dura_inner_skull_14	FAM120A	NA	NA	NA	NA	NA	NA	NA
CA27	0	-0.34419	0.384	0.656	0	CA27_dura_inner_skull_14	FAM120B	NA	NA	NA	NA	NA	NA	NA
CA27	1.68827e-172	-0.551745	0.335	0.524	2.6332e-168	CA27_dura_inner_skull_14	FAM13A	NA	NA	NA	NA	NA	NA	NA
CA27	0	1.4432	0.591	0.044	0	CA27_dura_inner_skull_14	FAM155A	NA	NA	NA	NA	NA	NA	NA
CA27	4.4151e-220	-0.253339	0.31	0.511	6.88624e-216	CA27_dura_inner_skull_14	FAM168A	NA	NA	NA	NA	NA	NA	NA
CA27	2.62487196322537e-319	-0.339169	0.953	0.925	4.09401280104262e-315	CA27_dura_inner_skull_14	FAM172A	NA	NA	NA	NA	NA	NA	NA
CA27	4.69379e-246	-0.327281	0.181	0.387	7.3209e-242	CA27_dura_inner_skull_14	FAM189A1	NA	NA	NA	NA	NA	NA	NA
CA27	0	-0.379077	0.35	0.629	0	CA27_dura_inner_skull_14	FAM193A	NA	NA	NA	NA	NA	NA	NA
CA27	0	-0.492268	0.129	0.429	0	CA27_dura_inner_skull_14	FAM20B	NA	NA	NA	NA	NA	NA	NA
CA27	6.34954e-229	-0.289492	0.123	0.305	9.90337e-225	CA27_dura_inner_skull_14	FAM219A	NA	NA	NA	NA	NA	NA	NA
CA27	4.27638e-201	-0.26027	0.166	0.346	6.66988e-197	CA27_dura_inner_skull_14	FAM222B	NA	NA	NA	NA	NA	NA	NA
CA27	0	-0.368108	0.054	0.244	0	CA27_dura_inner_skull_14	FANK1	NA	NA	NA	NA	NA	NA	NA
CA27	0	-0.830481	0.612	0.859	0	CA27_dura_inner_skull_14	FARP1	NA	NA	NA	NA	NA	NA	NA
CA27	5.09996e-293	-0.321221	0.202	0.43	7.9544e-289	CA27_dura_inner_skull_14	FBXL20	NA	NA	NA	NA	NA	NA	NA
CA27	5.57257e-217	-0.26244	0.213	0.409	8.69154e-213	CA27_dura_inner_skull_14	FBXL5	NA	NA	NA	NA	NA	NA	NA
CA27	0	0.760742	0.497	0.235	0	CA27_dura_inner_skull_14	FBXL7	NA	NA	NA	NA	NA	NA	NA
CA27	4.8158e-196	-0.25945	0.155	0.331	7.5112e-192	CA27_dura_inner_skull_14	FBXO25	NA	NA	NA	NA	NA	NA	NA
CA27	8.81534e-241	-0.297256	0.12	0.303	1.37493e-236	CA27_dura_inner_skull_14	FBXO9	NA	NA	NA	NA	NA	NA	NA
CA27	8.96083e-279	0.283408	0.983	0.866	1.39762e-274	CA27_dura_inner_skull_14	FBXW11	NA	NA	NA	NA	NA	NA	NA
CA27	0	-0.440497	0.344	0.655	0	CA27_dura_inner_skull_14	FBXW4	NA	NA	NA	NA	NA	NA	NA
CA27	4.38942741734739e-319	0.333935	0.978	0.84	6.84618994283672e-315	CA27_dura_inner_skull_14	FBXW7	NA	NA	NA	NA	NA	NA	NA
CA27	0	-0.397419	0.291	0.585	0	CA27_dura_inner_skull_14	FBXW8	NA	NA	NA	NA	NA	NA	NA
CA27	5.18272e-223	-0.255089	0.245	0.44	8.08349e-219	CA27_dura_inner_skull_14	FCHSD2	NA	NA	NA	NA	NA	NA	NA
CA27	0	0.420426	0.999	0.937	0	CA27_dura_inner_skull_14	FGF13	NA	NA	NA	NA	NA	NA	NA
CA27	1.01557e-242	0.278489	0.966	0.829	1.58398e-238	CA27_dura_inner_skull_14	FHIT	NA	NA	NA	NA	NA	NA	NA
CA27	2.07561e-305	-0.402102	0.12	0.33	3.23733e-301	CA27_dura_inner_skull_14	FLG-AS1	NA	NA	NA	NA	NA	NA	NA
CA27	0	-0.461967	0.124	0.392	0	CA27_dura_inner_skull_14	FLOT1	NA	NA	NA	NA	NA	NA	NA
CA27	2.67362e-272	-0.277717	0.026	0.164	4.17005e-268	CA27_dura_inner_skull_14	FLVCR2	NA	NA	NA	NA	NA	NA	NA
CA27	0	0.401591	0.867	0.631	0	CA27_dura_inner_skull_14	FNBP1	NA	NA	NA	NA	NA	NA	NA
CA27	1.69184e-198	-0.326436	0.318	0.519	2.63876e-194	CA27_dura_inner_skull_14	FNIP2	NA	NA	NA	NA	NA	NA	NA
CA27	0	0.430439	0.99	0.88	0	CA27_dura_inner_skull_14	FOLH1	NA	NA	NA	NA	NA	NA	NA
CA27	2.43134e-257	-0.308239	0.138	0.338	3.79216e-253	CA27_dura_inner_skull_14	FOXK1	NA	NA	NA	NA	NA	NA	NA
CA27	0	-0.442483	0.208	0.495	0	CA27_dura_inner_skull_14	FOXK2	NA	NA	NA	NA	NA	NA	NA
CA27	2.35635e-148	0.353085	0.623	0.56	3.6752e-144	CA27_dura_inner_skull_14	FOXO3	NA	NA	NA	NA	NA	NA	NA
CA27	0	0.437292	1	0.992	0	CA27_dura_inner_skull_14	FOXP1	NA	NA	NA	NA	NA	NA	NA
CA27	2.22926e-169	-0.484561	0.218	0.393	3.47698e-165	CA27_dura_inner_skull_14	FRAS1	NA	NA	NA	NA	NA	NA	NA
CA27	1.28105e-211	-0.251569	0.033	0.154	1.99806e-207	CA27_dura_inner_skull_14	FSIP1	NA	NA	NA	NA	NA	NA	NA
CA27	1.22958e-115	-0.587675	0.356	0.511	1.91778e-111	CA27_dura_inner_skull_14	FSTL4	NA	NA	NA	NA	NA	NA	NA
CA27	0	-0.328752	0.242	0.498	0	CA27_dura_inner_skull_14	FTO	NA	NA	NA	NA	NA	NA	NA
CA27	0	-0.529908	0.108	0.352	0	CA27_dura_inner_skull_14	FYB2	NA	NA	NA	NA	NA	NA	NA
CA27	0	-0.361331	0.125	0.349	0	CA27_dura_inner_skull_14	GABPB2	NA	NA	NA	NA	NA	NA	NA
CA27	3.35475e-120	0.306792	0.574	0.479	5.23241e-116	CA27_dura_inner_skull_14	GALNT17	NA	NA	NA	NA	NA	NA	NA
CA27	4.89505e-159	-0.291329	0.069	0.194	7.63481e-155	CA27_dura_inner_skull_14	GALNT18	NA	NA	NA	NA	NA	NA	NA
CA27	0	-1.08338	0.166	0.604	0	CA27_dura_inner_skull_14	GALNTL6	NA	NA	NA	NA	NA	NA	NA
CA27	1.43979e-262	-0.268605	0.088	0.266	2.24564e-258	CA27_dura_inner_skull_14	GANAB	NA	NA	NA	NA	NA	NA	NA
CA27	3.36009e-232	-0.292688	0.194	0.397	5.24074e-228	CA27_dura_inner_skull_14	GATAD2A	NA	NA	NA	NA	NA	NA	NA
CA27	1.30542e-153	-0.307572	0.693	0.775	2.03606e-149	CA27_dura_inner_skull_14	GATAD2B	NA	NA	NA	NA	NA	NA	NA
CA27	9.61081e-121	-0.294868	0.232	0.378	1.499e-116	CA27_dura_inner_skull_14	GBE1	NA	NA	NA	NA	NA	NA	NA
CA27	3.7706e-302	-0.32353	0.056	0.23	5.88101e-298	CA27_dura_inner_skull_14	GCNT1	NA	NA	NA	NA	NA	NA	NA
CA27	5.06631e-247	-0.401036	0.066	0.226	7.90193e-243	CA27_dura_inner_skull_14	GHR	NA	NA	NA	NA	NA	NA	NA
CA27	3.29265e-265	-0.36019	0.174	0.387	5.13555e-261	CA27_dura_inner_skull_14	GLCCI1	NA	NA	NA	NA	NA	NA	NA
CA27	1.33257e-269	-0.317681	0.136	0.338	2.07841e-265	CA27_dura_inner_skull_14	GLO1	NA	NA	NA	NA	NA	NA	NA
CA27	2.81015e-107	-0.313066	0.693	0.779	4.38299e-103	CA27_dura_inner_skull_14	GLYATL1	NA	NA	NA	NA	NA	NA	NA
CA27	0	-1.06575	0.84	0.938	0	CA27_dura_inner_skull_14	GMDS	NA	NA	NA	NA	NA	NA	NA
CA27	0	-0.552618	0.775	0.858	0	CA27_dura_inner_skull_14	GMDS-DT	NA	NA	NA	NA	NA	NA	NA
CA27	2.91504e-224	-0.285998	0.235	0.439	4.54659e-220	CA27_dura_inner_skull_14	GMPS	NA	NA	NA	NA	NA	NA	NA
CA27	0	0.423346	0.99	0.885	0	CA27_dura_inner_skull_14	GNAQ	NA	NA	NA	NA	NA	NA	NA
CA27	1.21267e-196	-0.29498	0.11	0.271	1.8914e-192	CA27_dura_inner_skull_14	GNG12-AS1	NA	NA	NA	NA	NA	NA	NA
CA27	4.38622e-257	0.326905	0.993	0.942	6.84119e-253	CA27_dura_inner_skull_14	GOLPH3	NA	NA	NA	NA	NA	NA	NA
CA27	0	-0.762558	0.155	0.575	0	CA27_dura_inner_skull_14	GOLPH3L	NA	NA	NA	NA	NA	NA	NA
CA27	5.73265e-248	-0.280475	0.179	0.385	8.94121e-244	CA27_dura_inner_skull_14	GON4L	NA	NA	NA	NA	NA	NA	NA
CA27	0	1.39521	0.874	0.603	0	CA27_dura_inner_skull_14	GPC5	NA	NA	NA	NA	NA	NA	NA
CA27	0	1.48963	1	0.989	0	CA27_dura_inner_skull_14	GPC6	NA	NA	NA	NA	NA	NA	NA
CA27	0	0.602273	0.721	0.33	0	CA27_dura_inner_skull_14	GPM6A	NA	NA	NA	NA	NA	NA	NA
CA27	8.96534e-192	0.341081	0.537	0.494	1.39832e-187	CA27_dura_inner_skull_14	GPR137C	NA	NA	NA	NA	NA	NA	NA
CA27	3.16375e-278	-0.326925	0.143	0.351	4.9345e-274	CA27_dura_inner_skull_14	GPR89B	NA	NA	NA	NA	NA	NA	NA
CA27	0	-0.321186	0.025	0.206	0	CA27_dura_inner_skull_14	GPT2	NA	NA	NA	NA	NA	NA	NA
CA27	1.96549e-253	-0.360378	0.136	0.334	3.06557e-249	CA27_dura_inner_skull_14	GRAMD4	NA	NA	NA	NA	NA	NA	NA
CA27	0	-0.473153	0.16	0.421	0	CA27_dura_inner_skull_14	GREB1L	NA	NA	NA	NA	NA	NA	NA
CA27	0	0.630929	1	0.976	0	CA27_dura_inner_skull_14	GRHL2	NA	NA	NA	NA	NA	NA	NA
CA27	2.83795e-212	0.375773	0.318	0.167	4.42636e-208	CA27_dura_inner_skull_14	GRID1	NA	NA	NA	NA	NA	NA	NA
CA27	0	0.99326	0.596	0.313	0	CA27_dura_inner_skull_14	GRIK2	NA	NA	NA	NA	NA	NA	NA
CA27	0	1.61561	0.984	0.542	0	CA27_dura_inner_skull_14	GRIN3A	NA	NA	NA	NA	NA	NA	NA
CA27	0	1.03201	0.473	0.114	0	CA27_dura_inner_skull_14	GRM8	NA	NA	NA	NA	NA	NA	NA
CA27	3.19855e-247	-0.284526	0.109	0.294	4.98878e-243	CA27_dura_inner_skull_14	GSAP	NA	NA	NA	NA	NA	NA	NA
CA27	2.19547951042475e-319	-0.353462	0.118	0.33	3.42428939240948e-315	CA27_dura_inner_skull_14	GSE1	NA	NA	NA	NA	NA	NA	NA
CA27	1.63417e-240	-0.264657	0.088	0.258	2.54881e-236	CA27_dura_inner_skull_14	GSTO2	NA	NA	NA	NA	NA	NA	NA
CA27	8.31534e-257	-0.275118	0.077	0.25	1.29694e-252	CA27_dura_inner_skull_14	GTF2A1	NA	NA	NA	NA	NA	NA	NA
CA27	3.82683e-166	-0.25447	0.228	0.402	5.96871e-162	CA27_dura_inner_skull_14	GTF2IRD1	NA	NA	NA	NA	NA	NA	NA
CA27	0	0.394405	0.935	0.703	0	CA27_dura_inner_skull_14	GUCY1A1	NA	NA	NA	NA	NA	NA	NA
CA27	2.47539e-195	-0.354512	0.555	0.746	3.86086e-191	CA27_dura_inner_skull_14	GULP1	NA	NA	NA	NA	NA	NA	NA
CA27	0	-0.473698	0.166	0.464	0	CA27_dura_inner_skull_14	H2AFY	NA	NA	NA	NA	NA	NA	NA
CA27	1.99796e-192	-0.277495	0.292	0.481	3.11623e-188	CA27_dura_inner_skull_14	HACD2	NA	NA	NA	NA	NA	NA	NA
CA27	6.85095e-266	-0.35484	0.153	0.361	1.06854e-261	CA27_dura_inner_skull_14	HCG17	NA	NA	NA	NA	NA	NA	NA
CA27	1.46846e-194	-0.284702	0.132	0.301	2.29035e-190	CA27_dura_inner_skull_14	HEATR5A	NA	NA	NA	NA	NA	NA	NA
CA27	0	-0.795344	0.005	0.181	0	CA27_dura_inner_skull_14	HEPACAM2	NA	NA	NA	NA	NA	NA	NA
CA27	1.61889e-82	0.250082	0.8	0.715	2.52498e-78	CA27_dura_inner_skull_14	HERC4	NA	NA	NA	NA	NA	NA	NA
CA27	9.28843414181544e-322	-0.417331	0.108	0.32	1.44871707309895e-317	CA27_dura_inner_skull_14	HEXB	NA	NA	NA	NA	NA	NA	NA
CA27	1.43914e-239	-0.318634	0.193	0.399	2.24462e-235	CA27_dura_inner_skull_14	HGSNAT	NA	NA	NA	NA	NA	NA	NA
CA27	5.05242e-210	-0.268816	0.372	0.573	7.88026e-206	CA27_dura_inner_skull_14	HIVEP1	NA	NA	NA	NA	NA	NA	NA
CA27	0	0.646653	0.964	0.727	0	CA27_dura_inner_skull_14	HIVEP2	NA	NA	NA	NA	NA	NA	NA
CA27	0	-0.406822	0.084	0.31	0	CA27_dura_inner_skull_14	HIVEP3	NA	NA	NA	NA	NA	NA	NA
CA27	2.59242e-193	-0.250703	0.07	0.211	4.04339e-189	CA27_dura_inner_skull_14	HK2	NA	NA	NA	NA	NA	NA	NA
CA27	8.68072e-292	-0.301734	0.083	0.272	1.35393e-287	CA27_dura_inner_skull_14	HLA-DMA	NA	NA	NA	NA	NA	NA	NA
CA27	0	-0.440383	0.274	0.538	0	CA27_dura_inner_skull_14	HLCS	NA	NA	NA	NA	NA	NA	NA
CA27	0	-0.460527	0.224	0.518	0	CA27_dura_inner_skull_14	HM13	NA	NA	NA	NA	NA	NA	NA
CA27	1.15862e-224	-0.266783	0.086	0.243	1.8071e-220	CA27_dura_inner_skull_14	HMGA1P4	NA	NA	NA	NA	NA	NA	NA
CA27	0	-0.344316	0.193	0.449	0	CA27_dura_inner_skull_14	HNRNPF	NA	NA	NA	NA	NA	NA	NA
CA27	3.14152e-124	0.266235	0.595	0.512	4.89983e-120	CA27_dura_inner_skull_14	HOMER2	NA	NA	NA	NA	NA	NA	NA
CA27	1.8784e-210	-0.269966	0.052	0.182	2.92974e-206	CA27_dura_inner_skull_14	HPCAL1	NA	NA	NA	NA	NA	NA	NA
CA27	0	-0.528776	0.242	0.547	0	CA27_dura_inner_skull_14	HPN	NA	NA	NA	NA	NA	NA	NA
CA27	0	0.651368	0.405	0.182	0	CA27_dura_inner_skull_14	HS3ST4	NA	NA	NA	NA	NA	NA	NA
CA27	0	-0.738015	0.118	0.393	0	CA27_dura_inner_skull_14	HS6ST3	NA	NA	NA	NA	NA	NA	NA
CA27	0	-0.471775	0.19	0.441	0	CA27_dura_inner_skull_14	HSP90AA1	NA	NA	NA	NA	NA	NA	NA
CA27	4.11069e-233	-0.258606	0.082	0.246	6.41144e-229	CA27_dura_inner_skull_14	HSPA12A	NA	NA	NA	NA	NA	NA	NA
CA27	6.86913e-228	-0.266279	0.234	0.438	1.07138e-223	CA27_dura_inner_skull_14	HTT	NA	NA	NA	NA	NA	NA	NA
CA27	7.35868e-203	-0.29787	0.139	0.311	1.14773e-198	CA27_dura_inner_skull_14	HULC	NA	NA	NA	NA	NA	NA	NA
CA27	3.20754e-306	-0.354724	0.35	0.602	5.0028e-302	CA27_dura_inner_skull_14	ICA1	NA	NA	NA	NA	NA	NA	NA
CA27	4.56796e-220	-0.280336	0.164	0.354	7.12465e-216	CA27_dura_inner_skull_14	IDE	NA	NA	NA	NA	NA	NA	NA
CA27	4.74926e-242	-0.334704	0.123	0.301	7.40742e-238	CA27_dura_inner_skull_14	IDH2	NA	NA	NA	NA	NA	NA	NA
CA27	5.44531e-255	-0.30913	0.411	0.639	8.49304e-251	CA27_dura_inner_skull_14	IFT43	NA	NA	NA	NA	NA	NA	NA
CA27	4.42456e-204	0.386856	0.731	0.564	6.90098e-200	CA27_dura_inner_skull_14	IFT57	NA	NA	NA	NA	NA	NA	NA
CA27	1.92791e-230	-0.258137	0.163	0.353	3.00695e-226	CA27_dura_inner_skull_14	IFT88	NA	NA	NA	NA	NA	NA	NA
CA27	0	0.808007	0.992	0.897	0	CA27_dura_inner_skull_14	IGF1R	NA	NA	NA	NA	NA	NA	NA
CA27	3.15319e-267	-0.317011	0.162	0.374	4.91803e-263	CA27_dura_inner_skull_14	IKBKB	NA	NA	NA	NA	NA	NA	NA
CA27	1.09659e-227	-0.325926	0.118	0.294	1.71035e-223	CA27_dura_inner_skull_14	IL6R	NA	NA	NA	NA	NA	NA	NA
CA27	7.98102e-135	-0.259893	0.159	0.297	1.2448e-130	CA27_dura_inner_skull_14	IL7	NA	NA	NA	NA	NA	NA	NA
CA27	0	1.26735	0.936	0.672	0	CA27_dura_inner_skull_14	INPP4B	NA	NA	NA	NA	NA	NA	NA
CA27	0	-0.622558	0.24	0.575	0	CA27_dura_inner_skull_14	INSR	NA	NA	NA	NA	NA	NA	NA
CA27	1.96716e-238	-0.25219	0.085	0.25	3.06817e-234	CA27_dura_inner_skull_14	INTS3	NA	NA	NA	NA	NA	NA	NA
CA27	0	-0.383469	0.135	0.38	0	CA27_dura_inner_skull_14	IP6K1	NA	NA	NA	NA	NA	NA	NA
CA27	8.21564e-286	-0.306206	0.342	0.582	1.28139e-281	CA27_dura_inner_skull_14	IPO9	NA	NA	NA	NA	NA	NA	NA
CA27	0	-0.803007	0.061	0.461	0	CA27_dura_inner_skull_14	IPO9-AS1	NA	NA	NA	NA	NA	NA	NA
CA27	8.04875e-203	-0.273193	0.131	0.303	1.25536e-198	CA27_dura_inner_skull_14	IQCH	NA	NA	NA	NA	NA	NA	NA
CA27	1.89897e-143	0.316711	0.302	0.177	2.96183e-139	CA27_dura_inner_skull_14	IQGAP2	NA	NA	NA	NA	NA	NA	NA
CA27	0	0.547737	0.722	0.489	0	CA27_dura_inner_skull_14	IRS1	NA	NA	NA	NA	NA	NA	NA
CA27	4.01874e-232	-0.28748	0.09	0.256	6.26803e-228	CA27_dura_inner_skull_14	ITGA9-AS1	NA	NA	NA	NA	NA	NA	NA
CA27	5.74323e-270	-0.306708	0.117	0.314	8.95772e-266	CA27_dura_inner_skull_14	ITGB3BP	NA	NA	NA	NA	NA	NA	NA
CA27	5.09021e-291	-0.401054	0.245	0.485	7.9392e-287	CA27_dura_inner_skull_14	ITGB5	NA	NA	NA	NA	NA	NA	NA
CA27	1.86385e-197	-0.287762	0.151	0.323	2.90705e-193	CA27_dura_inner_skull_14	ITPK1	NA	NA	NA	NA	NA	NA	NA
CA27	1.93235e-255	-0.505365	0.277	0.504	3.01389e-251	CA27_dura_inner_skull_14	ITPR2	NA	NA	NA	NA	NA	NA	NA
CA27	2.43377e-286	-0.348695	0.233	0.467	3.79595e-282	CA27_dura_inner_skull_14	JMY	NA	NA	NA	NA	NA	NA	NA
CA27	3.07846e-224	-0.266433	0.094	0.258	4.80147e-220	CA27_dura_inner_skull_14	JPT2	NA	NA	NA	NA	NA	NA	NA
CA27	0	0.534282	0.902	0.631	0	CA27_dura_inner_skull_14	KANK1	NA	NA	NA	NA	NA	NA	NA
CA27	3.26108e-251	-0.529663	0.359	0.581	5.08631e-247	CA27_dura_inner_skull_14	KANSL1L	NA	NA	NA	NA	NA	NA	NA
CA27	2.27917e-176	-0.253432	0.103	0.25	3.55481e-172	CA27_dura_inner_skull_14	KATNAL2	NA	NA	NA	NA	NA	NA	NA
CA27	0	-1.6366	0.135	0.678	0	CA27_dura_inner_skull_14	KAZN	NA	NA	NA	NA	NA	NA	NA
CA27	5.1308e-288	-0.297136	0.034	0.186	8.00251e-284	CA27_dura_inner_skull_14	KCNC1	NA	NA	NA	NA	NA	NA	NA
CA27	7.13322e-96	0.359518	0.421	0.306	1.11257e-91	CA27_dura_inner_skull_14	KCNMA1	NA	NA	NA	NA	NA	NA	NA
CA27	2.01831e-213	-0.717377	0.349	0.556	3.14796e-209	CA27_dura_inner_skull_14	KCNMB2	NA	NA	NA	NA	NA	NA	NA
CA27	0	-0.631932	0.151	0.387	0	CA27_dura_inner_skull_14	KCNMB2-AS1	NA	NA	NA	NA	NA	NA	NA
CA27	0	0.579534	0.883	0.656	0	CA27_dura_inner_skull_14	KCNN2	NA	NA	NA	NA	NA	NA	NA
CA27	0	-0.341467	0.026	0.181	0	CA27_dura_inner_skull_14	KCNQ2	NA	NA	NA	NA	NA	NA	NA
CA27	0	-0.384163	0.013	0.216	0	CA27_dura_inner_skull_14	KCNU1	NA	NA	NA	NA	NA	NA	NA
CA27	9.69622e-255	0.556486	0.392	0.237	1.51232e-250	CA27_dura_inner_skull_14	KCTD16	NA	NA	NA	NA	NA	NA	NA
CA27	0	-0.357808	0.248	0.515	0	CA27_dura_inner_skull_14	KDM3B	NA	NA	NA	NA	NA	NA	NA
CA27	0	-0.501647	0.277	0.587	0	CA27_dura_inner_skull_14	KDM4B	NA	NA	NA	NA	NA	NA	NA
CA27	1.0593755578128e-318	0.280503	0.916	0.715	1.65230805752063e-314	CA27_dura_inner_skull_14	KDM6A	NA	NA	NA	NA	NA	NA	NA
CA27	5.62286e-263	-0.309968	0.173	0.386	8.76998e-259	CA27_dura_inner_skull_14	KHDC4	NA	NA	NA	NA	NA	NA	NA
CA27	3.82729e-164	-0.253009	0.043	0.152	5.96943e-160	CA27_dura_inner_skull_14	KIAA0319	NA	NA	NA	NA	NA	NA	NA
CA27	8.20397e-271	-0.316759	0.193	0.413	1.27957e-266	CA27_dura_inner_skull_14	KIAA0319L	NA	NA	NA	NA	NA	NA	NA
CA27	1.54151e-296	-0.34593	0.163	0.388	2.40429e-292	CA27_dura_inner_skull_14	KIAA0556	NA	NA	NA	NA	NA	NA	NA
CA27	6.23154e-189	0.431269	0.505	0.366	9.71934e-185	CA27_dura_inner_skull_14	KIAA1217	NA	NA	NA	NA	NA	NA	NA
CA27	3.25852e-176	-0.25822	0.213	0.386	5.08231e-172	CA27_dura_inner_skull_14	KIAA1324	NA	NA	NA	NA	NA	NA	NA
CA27	6.88422e-269	-0.320447	0.146	0.355	1.07373e-264	CA27_dura_inner_skull_14	KIAA1549	NA	NA	NA	NA	NA	NA	NA
CA27	2.98761e-224	0.278354	0.865	0.684	4.65977e-220	CA27_dura_inner_skull_14	KIAA1958	NA	NA	NA	NA	NA	NA	NA
CA27	0	-0.344877	0.248	0.505	0	CA27_dura_inner_skull_14	KIF2A	NA	NA	NA	NA	NA	NA	NA
CA27	7.03152e-192	0.258845	0.331	0.277	1.09671e-187	CA27_dura_inner_skull_14	KIF5C	NA	NA	NA	NA	NA	NA	NA
CA27	4.6253e-289	-0.320334	0.09	0.281	7.21409e-285	CA27_dura_inner_skull_14	KIF9-AS1	NA	NA	NA	NA	NA	NA	NA
CA27	0	-0.632597	0.081	0.354	0	CA27_dura_inner_skull_14	KITLG	NA	NA	NA	NA	NA	NA	NA
CA27	2.16553e-226	-0.303138	0.177	0.372	3.37758e-222	CA27_dura_inner_skull_14	KLF3	NA	NA	NA	NA	NA	NA	NA
CA27	1.26336e-297	-0.337051	0.141	0.361	1.97047e-293	CA27_dura_inner_skull_14	KLHL22	NA	NA	NA	NA	NA	NA	NA
CA27	7.03626e-125	-0.260276	0.934	0.892	1.09744e-120	CA27_dura_inner_skull_14	KLK3	NA	NA	NA	NA	NA	NA	NA
CA27	5.0487e-276	-0.316103	0.114	0.308	7.87446e-272	CA27_dura_inner_skull_14	KLK4	NA	NA	NA	NA	NA	NA	NA
CA27	0	0.519654	1	0.992	0	CA27_dura_inner_skull_14	KMT2C	NA	NA	NA	NA	NA	NA	NA
CA27	0	0.426103	0.989	0.886	0	CA27_dura_inner_skull_14	KMT2E	NA	NA	NA	NA	NA	NA	NA
CA27	1.30409e-217	-0.259901	0.093	0.258	2.03399e-213	CA27_dura_inner_skull_14	KNTC1	NA	NA	NA	NA	NA	NA	NA
CA27	7.82616e-235	-0.281988	0.139	0.329	1.22065e-230	CA27_dura_inner_skull_14	KPNB1	NA	NA	NA	NA	NA	NA	NA
CA27	0	-0.732047	0.134	0.455	0	CA27_dura_inner_skull_14	KSR2	NA	NA	NA	NA	NA	NA	NA
CA27	1.8816e-295	-0.272097	0.062	0.24	2.93473e-291	CA27_dura_inner_skull_14	L3MBTL1	NA	NA	NA	NA	NA	NA	NA
CA27	0	-0.570964	0.201	0.522	0	CA27_dura_inner_skull_14	LAMC1	NA	NA	NA	NA	NA	NA	NA
CA27	1.27618e-157	-0.45956	0.393	0.575	1.99046e-153	CA27_dura_inner_skull_14	LARGE1	NA	NA	NA	NA	NA	NA	NA
CA27	0	-0.384334	0.275	0.552	0	CA27_dura_inner_skull_14	LARP1	NA	NA	NA	NA	NA	NA	NA
CA27	0	-0.473684	0.177	0.458	0	CA27_dura_inner_skull_14	LARP1B	NA	NA	NA	NA	NA	NA	NA
CA27	4.35481e-234	-0.268005	0.236	0.44	6.7922e-230	CA27_dura_inner_skull_14	LARP4	NA	NA	NA	NA	NA	NA	NA
CA27	3.66382e-228	-0.272417	0.289	0.495	5.71446e-224	CA27_dura_inner_skull_14	LCLAT1	NA	NA	NA	NA	NA	NA	NA
CA27	1.69634e-223	0.258979	0.86	0.677	2.64578e-219	CA27_dura_inner_skull_14	LCORL	NA	NA	NA	NA	NA	NA	NA
CA27	4.91562e-175	-0.39779	0.042	0.156	7.6669e-171	CA27_dura_inner_skull_14	LDLRAD4	NA	NA	NA	NA	NA	NA	NA
CA27	9.26103e-286	-0.339322	0.071	0.253	1.44444e-281	CA27_dura_inner_skull_14	LEF1	NA	NA	NA	NA	NA	NA	NA
CA27	9.57286e-261	-0.267878	0.078	0.252	1.49308e-256	CA27_dura_inner_skull_14	LETMD1	NA	NA	NA	NA	NA	NA	NA
CA27	7.27558e-125	0.274494	0.39	0.354	1.13477e-120	CA27_dura_inner_skull_14	LGR4	NA	NA	NA	NA	NA	NA	NA
CA27	2.08537e-203	-0.312403	0.127	0.291	3.25255e-199	CA27_dura_inner_skull_14	LIMA1	NA	NA	NA	NA	NA	NA	NA
CA27	9.17102933294742e-312	-0.366186	0.175	0.411	1.43041e-307	CA27_dura_inner_skull_14	LIMD1	NA	NA	NA	NA	NA	NA	NA
CA27	2.79531e-240	-0.279628	0.274	0.485	4.35984e-236	CA27_dura_inner_skull_14	LIMS1	NA	NA	NA	NA	NA	NA	NA
CA27	1.32671e-238	-0.273138	0.198	0.4	2.06927e-234	CA27_dura_inner_skull_14	LIN52	NA	NA	NA	NA	NA	NA	NA
CA27	0	-0.377921	0.031	0.221	0	CA27_dura_inner_skull_14	LIN7A	NA	NA	NA	NA	NA	NA	NA
CA27	8.20894e-302	-0.35084	0.187	0.421	1.28035e-297	CA27_dura_inner_skull_14	LINC00174	NA	NA	NA	NA	NA	NA	NA
CA27	5.98237e-165	-0.461632	0.083	0.21	9.3307e-161	CA27_dura_inner_skull_14	LINC00342	NA	NA	NA	NA	NA	NA	NA
CA27	4.62515e-179	-0.256944	0.065	0.198	7.21385e-175	CA27_dura_inner_skull_14	LINC00882	NA	NA	NA	NA	NA	NA	NA
CA27	1.12779e-256	-0.299347	0.37	0.595	1.75902e-252	CA27_dura_inner_skull_14	LINC00894	NA	NA	NA	NA	NA	NA	NA
CA27	4.71916e-250	-0.271324	0.072	0.233	7.36048e-246	CA27_dura_inner_skull_14	LINC00910	NA	NA	NA	NA	NA	NA	NA
CA27	9.26006e-239	0.327288	0.181	0.072	1.44429e-234	CA27_dura_inner_skull_14	LINC00992	NA	NA	NA	NA	NA	NA	NA
CA27	0	-0.474926	0.314	0.636	0	CA27_dura_inner_skull_14	LINC01004	NA	NA	NA	NA	NA	NA	NA
CA27	0	0.485279	0.404	0.242	0	CA27_dura_inner_skull_14	LINC01087	NA	NA	NA	NA	NA	NA	NA
CA27	9.51938e-121	-0.287177	0.486	0.642	1.48474e-116	CA27_dura_inner_skull_14	LINC01138	NA	NA	NA	NA	NA	NA	NA
CA27	0	0.666701	0.411	0.244	0	CA27_dura_inner_skull_14	LINC01146	NA	NA	NA	NA	NA	NA	NA
CA27	3.85435e-291	-0.339591	0.105	0.307	6.01164e-287	CA27_dura_inner_skull_14	LINC01184	NA	NA	NA	NA	NA	NA	NA
CA27	3.81892315431333e-310	-0.364032	0.334	0.583	5.95637e-306	CA27_dura_inner_skull_14	LINC01194	NA	NA	NA	NA	NA	NA	NA
CA27	0	-0.322725	0.057	0.243	0	CA27_dura_inner_skull_14	LINC01237	NA	NA	NA	NA	NA	NA	NA
CA27	5.76598e-209	-0.265357	0.078	0.227	8.9932e-205	CA27_dura_inner_skull_14	LINC01301	NA	NA	NA	NA	NA	NA	NA
CA27	1.09296e-227	-0.273459	0.007	0.105	1.7047e-223	CA27_dura_inner_skull_14	LINC01344	NA	NA	NA	NA	NA	NA	NA
CA27	6.34664e-195	-0.259447	0.105	0.263	9.89886e-191	CA27_dura_inner_skull_14	LINC01376	NA	NA	NA	NA	NA	NA	NA
CA27	8.36752e-306	-0.344756	0.068	0.256	1.30508e-301	CA27_dura_inner_skull_14	LINC01446	NA	NA	NA	NA	NA	NA	NA
CA27	0	-0.254923	0.01	0.154	0	CA27_dura_inner_skull_14	LINC01605	NA	NA	NA	NA	NA	NA	NA
CA27	6.42305e-148	0.316593	0.721	0.562	1.0018e-143	CA27_dura_inner_skull_14	LINC01619	NA	NA	NA	NA	NA	NA	NA
CA27	0	0.507985	0.361	0.15	0	CA27_dura_inner_skull_14	LINC01687	NA	NA	NA	NA	NA	NA	NA
CA27	0	0.421256	0.244	0.063	0	CA27_dura_inner_skull_14	LINC01723	NA	NA	NA	NA	NA	NA	NA
CA27	4.50352e-158	0.296316	0.285	0.154	7.02413e-154	CA27_dura_inner_skull_14	LINC01790	NA	NA	NA	NA	NA	NA	NA
CA27	5.97184e-216	0.422734	0.322	0.171	9.31428e-212	CA27_dura_inner_skull_14	LINC01821	NA	NA	NA	NA	NA	NA	NA
CA27	0	0.732043	0.293	0.06	0	CA27_dura_inner_skull_14	LINC02147	NA	NA	NA	NA	NA	NA	NA
CA27	0	1.30613	0.838	0.389	0	CA27_dura_inner_skull_14	LINC02163	NA	NA	NA	NA	NA	NA	NA
CA27	0	-0.38209	0.005	0.178	0	CA27_dura_inner_skull_14	LINC02223	NA	NA	NA	NA	NA	NA	NA
CA27	2.23104e-153	0.387588	0.335	0.216	3.47976e-149	CA27_dura_inner_skull_14	LINC02315	NA	NA	NA	NA	NA	NA	NA
CA27	4.40505e-291	0.37992	0.246	0.09	6.87055e-287	CA27_dura_inner_skull_14	LINC02516	NA	NA	NA	NA	NA	NA	NA
CA27	0	-0.425884	0.155	0.398	0	CA27_dura_inner_skull_14	LINC02615	NA	NA	NA	NA	NA	NA	NA
CA27	1.14162e-291	-0.323206	0.068	0.244	1.78059e-287	CA27_dura_inner_skull_14	LINC02694	NA	NA	NA	NA	NA	NA	NA
CA27	1.03765e-244	-0.308974	0.206	0.419	1.61842e-240	CA27_dura_inner_skull_14	LLGL2	NA	NA	NA	NA	NA	NA	NA
CA27	3.32622e-294	-0.323545	0.122	0.332	5.1879e-290	CA27_dura_inner_skull_14	LMF1	NA	NA	NA	NA	NA	NA	NA
CA27	1.8794e-217	-0.253278	0.063	0.212	2.9313e-213	CA27_dura_inner_skull_14	LMNB1	NA	NA	NA	NA	NA	NA	NA
CA27	1.12024e-144	-0.345832	0.045	0.142	1.74723e-140	CA27_dura_inner_skull_14	LMNTD1	NA	NA	NA	NA	NA	NA	NA
CA27	5.60796e-227	-0.272665	0.149	0.333	8.74673e-223	CA27_dura_inner_skull_14	LMO7	NA	NA	NA	NA	NA	NA	NA
CA27	1.21487e-206	-0.327487	0.147	0.326	1.89484e-202	CA27_dura_inner_skull_14	LPIN2	NA	NA	NA	NA	NA	NA	NA
CA27	2.66755e-198	0.265489	1	0.984	4.16058e-194	CA27_dura_inner_skull_14	LRBA	NA	NA	NA	NA	NA	NA	NA
CA27	0	-0.494595	0.26	0.548	0	CA27_dura_inner_skull_14	LRIG1	NA	NA	NA	NA	NA	NA	NA
CA27	1.21779e-203	0.267659	0.333	0.27	1.89939e-199	CA27_dura_inner_skull_14	LRP6	NA	NA	NA	NA	NA	NA	NA
CA27	7.16743e-216	-0.293216	0.2	0.393	1.1179e-211	CA27_dura_inner_skull_14	LRRC8D	NA	NA	NA	NA	NA	NA	NA
CA27	0	0.849708	0.701	0.42	0	CA27_dura_inner_skull_14	LRRC9	NA	NA	NA	NA	NA	NA	NA
CA27	0	0.745246	0.628	0.567	0	CA27_dura_inner_skull_14	LRRFIP2	NA	NA	NA	NA	NA	NA	NA
CA27	0	-0.969095	0.26	0.535	0	CA27_dura_inner_skull_14	LRRIQ1	NA	NA	NA	NA	NA	NA	NA
CA27	8.76802e-121	0.362974	0.352	0.253	1.36755e-116	CA27_dura_inner_skull_14	LRRN1	NA	NA	NA	NA	NA	NA	NA
CA27	1.36749e-136	0.650019	0.444	0.32	2.13288e-132	CA27_dura_inner_skull_14	LRRTM4	NA	NA	NA	NA	NA	NA	NA
CA27	0	1.21862	0.889	0.558	0	CA27_dura_inner_skull_14	LSAMP	NA	NA	NA	NA	NA	NA	NA
CA27	2.82152e-168	-0.573485	0.141	0.298	4.40073e-164	CA27_dura_inner_skull_14	LTBP1	NA	NA	NA	NA	NA	NA	NA
CA27	0	-0.588306	0.283	0.596	0	CA27_dura_inner_skull_14	LYN	NA	NA	NA	NA	NA	NA	NA
CA27	1.22412e-202	-0.250731	0.133	0.306	1.90926e-198	CA27_dura_inner_skull_14	LYPLA1	NA	NA	NA	NA	NA	NA	NA
CA27	0	-0.507869	0.37	0.646	0	CA27_dura_inner_skull_14	MACF1	NA	NA	NA	NA	NA	NA	NA
CA27	0	-0.360828	0.104	0.321	0	CA27_dura_inner_skull_14	MACROD1	NA	NA	NA	NA	NA	NA	NA
CA27	0	-0.328302	0.232	0.482	0	CA27_dura_inner_skull_14	MAD1L1	NA	NA	NA	NA	NA	NA	NA
CA27	0	0.395961	0.992	0.89	0	CA27_dura_inner_skull_14	MAGI1	NA	NA	NA	NA	NA	NA	NA
CA27	0	0.915449	0.502	0.213	0	CA27_dura_inner_skull_14	MAGI2	NA	NA	NA	NA	NA	NA	NA
CA27	4.01654e-257	-0.266501	0.954	0.918	6.2646e-253	CA27_dura_inner_skull_14	MALAT1	NA	NA	NA	NA	NA	NA	NA
CA27	0	1.13855	0.478	0.144	0	CA27_dura_inner_skull_14	MAML2	NA	NA	NA	NA	NA	NA	NA
CA27	0	0.52182	0.98	0.86	0	CA27_dura_inner_skull_14	MAML3	NA	NA	NA	NA	NA	NA	NA
CA27	8.86109729360024e-315	-0.35073	0.081	0.277	1.38206534488283e-310	CA27_dura_inner_skull_14	MAN1C1	NA	NA	NA	NA	NA	NA	NA
CA27	0	-0.463253	0.227	0.492	0	CA27_dura_inner_skull_14	MAN2A1	NA	NA	NA	NA	NA	NA	NA
CA27	0	0.670205	0.559	0.346	0	CA27_dura_inner_skull_14	MAP1B	NA	NA	NA	NA	NA	NA	NA
CA27	0	0.602344	0.546	0.304	0	CA27_dura_inner_skull_14	MAP2	NA	NA	NA	NA	NA	NA	NA
CA27	1.78665e-240	-0.259329	0.29	0.497	2.78663e-236	CA27_dura_inner_skull_14	MAP4	NA	NA	NA	NA	NA	NA	NA
CA27	3.22124e-286	-0.308334	0.07	0.251	5.02418e-282	CA27_dura_inner_skull_14	MAP4K3-DT	NA	NA	NA	NA	NA	NA	NA
CA27	0	0.554512	0.671	0.434	0	CA27_dura_inner_skull_14	MAP4K4	NA	NA	NA	NA	NA	NA	NA
CA27	2.23417e-262	0.272424	0.99	0.894	3.48463e-258	CA27_dura_inner_skull_14	MAP7	NA	NA	NA	NA	NA	NA	NA
CA27	3.90397e-138	0.359921	0.66	0.587	6.08902e-134	CA27_dura_inner_skull_14	MAPK10	NA	NA	NA	NA	NA	NA	NA
CA27	2.14134e-166	-0.261137	0.417	0.604	3.33985e-162	CA27_dura_inner_skull_14	MAPK1IP1L	NA	NA	NA	NA	NA	NA	NA
CA27	1.91451e-303	-0.560173	0.443	0.69	2.98606e-299	CA27_dura_inner_skull_14	MAPK4	NA	NA	NA	NA	NA	NA	NA
CA27	1.05367e-213	-0.294966	0.165	0.346	1.64341e-209	CA27_dura_inner_skull_14	MAPK9	NA	NA	NA	NA	NA	NA	NA
CA27	0	-0.433035	0.107	0.346	0	CA27_dura_inner_skull_14	MAPT	NA	NA	NA	NA	NA	NA	NA
CA27	0	-0.428086	0.312	0.576	0	CA27_dura_inner_skull_14	MAST2	NA	NA	NA	NA	NA	NA	NA
CA27	3.49241e-288	-0.464181	0.186	0.414	5.44711e-284	CA27_dura_inner_skull_14	MAST4	NA	NA	NA	NA	NA	NA	NA
CA27	4.87652e-132	0.264712	0.67	0.523	7.60591e-128	CA27_dura_inner_skull_14	MBD2	NA	NA	NA	NA	NA	NA	NA
CA27	8.21196e-192	0.383409	0.644	0.498	1.28082e-187	CA27_dura_inner_skull_14	MBD5	NA	NA	NA	NA	NA	NA	NA
CA27	1.35579e-240	-0.279508	0.059	0.213	2.11462e-236	CA27_dura_inner_skull_14	MBOAT1	NA	NA	NA	NA	NA	NA	NA
CA27	0	0.845795	0.891	0.605	0	CA27_dura_inner_skull_14	MBOAT2	NA	NA	NA	NA	NA	NA	NA
CA27	0	0.807728	0.974	0.702	0	CA27_dura_inner_skull_14	MCCC2	NA	NA	NA	NA	NA	NA	NA
CA27	1.21395e-219	-0.291146	0.193	0.389	1.89339e-215	CA27_dura_inner_skull_14	MCPH1	NA	NA	NA	NA	NA	NA	NA
CA27	0	-0.318861	0.234	0.493	0	CA27_dura_inner_skull_14	MDM4	NA	NA	NA	NA	NA	NA	NA
CA27	1.07606e-168	0.383162	0.383	0.289	1.67833e-164	CA27_dura_inner_skull_14	MECOM	NA	NA	NA	NA	NA	NA	NA
CA27	0	0.416281	0.999	0.968	0	CA27_dura_inner_skull_14	MED13L	NA	NA	NA	NA	NA	NA	NA
CA27	0	-0.35336	0.116	0.332	0	CA27_dura_inner_skull_14	MEF2D	NA	NA	NA	NA	NA	NA	NA
CA27	1.35245e-263	-0.285594	0.15	0.356	2.10942e-259	CA27_dura_inner_skull_14	METTL16	NA	NA	NA	NA	NA	NA	NA
CA27	1.17301221760373e-315	-0.281586	0.067	0.257	1.82954715579654e-311	CA27_dura_inner_skull_14	METTL27	NA	NA	NA	NA	NA	NA	NA
CA27	0	-0.322738	0.027	0.202	0	CA27_dura_inner_skull_14	MGAT4A	NA	NA	NA	NA	NA	NA	NA
CA27	2.89325e-220	-0.281575	0.201	0.397	4.5126e-216	CA27_dura_inner_skull_14	MGMT	NA	NA	NA	NA	NA	NA	NA
CA27	0	-0.335353	0.104	0.321	0	CA27_dura_inner_skull_14	MGRN1	NA	NA	NA	NA	NA	NA	NA
CA27	0	-0.554412	0.054	0.316	0	CA27_dura_inner_skull_14	MICAL2	NA	NA	NA	NA	NA	NA	NA
CA27	0	-0.473265	0.159	0.413	0	CA27_dura_inner_skull_14	MICAL3	NA	NA	NA	NA	NA	NA	NA
CA27	3.33823e-208	-0.283289	0.215	0.411	5.20663e-204	CA27_dura_inner_skull_14	MIOS	NA	NA	NA	NA	NA	NA	NA
CA27	0	-2.05394	0.088	0.735	0	CA27_dura_inner_skull_14	MIPEP	NA	NA	NA	NA	NA	NA	NA
CA27	0	-0.734926	0.749	0.874	0	CA27_dura_inner_skull_14	MIR29B2CHG	NA	NA	NA	NA	NA	NA	NA
CA27	0	-0.412159	0.082	0.338	0	CA27_dura_inner_skull_14	MIR3936HG	NA	NA	NA	NA	NA	NA	NA
CA27	1.6395e-204	-0.325613	0.181	0.367	2.55713e-200	CA27_dura_inner_skull_14	MIR646HG	NA	NA	NA	NA	NA	NA	NA
CA27	0	0.533811	0.944	0.654	0	CA27_dura_inner_skull_14	MIR99AHG	NA	NA	NA	NA	NA	NA	NA
CA27	1.02284e-274	-0.301759	0.365	0.599	1.59532e-270	CA27_dura_inner_skull_14	MIRLET7BHG	NA	NA	NA	NA	NA	NA	NA
CA27	5.22253e-219	-0.267146	0.232	0.431	8.14558e-215	CA27_dura_inner_skull_14	MLEC	NA	NA	NA	NA	NA	NA	NA
CA27	4.49143e-264	-0.281608	0.099	0.284	7.00528e-260	CA27_dura_inner_skull_14	MLH3	NA	NA	NA	NA	NA	NA	NA
CA27	0	-0.523518	0.5	0.773	0	CA27_dura_inner_skull_14	MLPH	NA	NA	NA	NA	NA	NA	NA
CA27	0	-2.28403	0.009	0.635	0	CA27_dura_inner_skull_14	MMP26	NA	NA	NA	NA	NA	NA	NA
CA27	0	-0.321045	0.007	0.2	0	CA27_dura_inner_skull_14	MON1B	NA	NA	NA	NA	NA	NA	NA
CA27	0	0.349744	0.973	0.811	0	CA27_dura_inner_skull_14	MON2	NA	NA	NA	NA	NA	NA	NA
CA27	4.2199e-242	-0.283968	0.095	0.267	6.58177e-238	CA27_dura_inner_skull_14	MPHOSPH9	NA	NA	NA	NA	NA	NA	NA
CA27	0	0.489384	0.981	0.86	0	CA27_dura_inner_skull_14	MPP6	NA	NA	NA	NA	NA	NA	NA
CA27	2.19218e-234	-0.287307	0.188	0.392	3.41914e-230	CA27_dura_inner_skull_14	MPRIP	NA	NA	NA	NA	NA	NA	NA
CA27	0	-0.406729	0.215	0.483	0	CA27_dura_inner_skull_14	MPZL1	NA	NA	NA	NA	NA	NA	NA
CA27	0	-0.356719	0.11	0.336	0	CA27_dura_inner_skull_14	MROH1	NA	NA	NA	NA	NA	NA	NA
CA27	1.70312e-295	-0.281673	0.066	0.249	2.65635e-291	CA27_dura_inner_skull_14	MRPS21	NA	NA	NA	NA	NA	NA	NA
CA27	2.51423e-294	-0.250653	0.336	0.565	3.92145e-290	CA27_dura_inner_skull_14	MRPS27	NA	NA	NA	NA	NA	NA	NA
CA27	4.98187e-231	-0.337502	0.141	0.328	7.77022e-227	CA27_dura_inner_skull_14	MSH2	NA	NA	NA	NA	NA	NA	NA
CA27	4.00244e-303	-0.296495	0.075	0.26	6.24261e-299	CA27_dura_inner_skull_14	MSH5	NA	NA	NA	NA	NA	NA	NA
CA27	0	-0.52609	0.012	0.222	0	CA27_dura_inner_skull_14	MSMB	NA	NA	NA	NA	NA	NA	NA
CA27	0	-0.522751	0.082	0.378	0	CA27_dura_inner_skull_14	MT-ATP8	NA	NA	NA	NA	NA	NA	NA
CA27	0	-1.04271	0.124	0.567	0	CA27_dura_inner_skull_14	MT-CO2	NA	NA	NA	NA	NA	NA	NA
CA27	0	-0.255191	0.011	0.178	0	CA27_dura_inner_skull_14	MT-ND2	NA	NA	NA	NA	NA	NA	NA
CA27	1.6449e-292	-0.313402	0.208	0.437	2.56555e-288	CA27_dura_inner_skull_14	MTA3	NA	NA	NA	NA	NA	NA	NA
CA27	4.2082e-288	-0.333682	0.135	0.343	6.56352e-284	CA27_dura_inner_skull_14	MTFR1	NA	NA	NA	NA	NA	NA	NA
CA27	9.92211e-233	-0.271653	0.124	0.303	1.54755e-228	CA27_dura_inner_skull_14	MTG1	NA	NA	NA	NA	NA	NA	NA
CA27	1.35248e-272	-0.28628	0.097	0.282	2.10946e-268	CA27_dura_inner_skull_14	MTG2	NA	NA	NA	NA	NA	NA	NA
CA27	9.41654e-284	0.363988	0.815	0.594	1.4687e-279	CA27_dura_inner_skull_14	MTHFD1L	NA	NA	NA	NA	NA	NA	NA
CA27	7.87173e-192	-0.259452	0.156	0.33	1.22775e-187	CA27_dura_inner_skull_14	MVB12B	NA	NA	NA	NA	NA	NA	NA
CA27	1.79834e-134	0.282505	0.378	0.338	2.80487e-130	CA27_dura_inner_skull_14	MYBPC1	NA	NA	NA	NA	NA	NA	NA
CA27	2.27781e-221	-0.260928	0.249	0.448	3.5527e-217	CA27_dura_inner_skull_14	MYH10	NA	NA	NA	NA	NA	NA	NA
CA27	3.70878e-180	-0.25435	0.118	0.267	5.78458e-176	CA27_dura_inner_skull_14	MYH9	NA	NA	NA	NA	NA	NA	NA
CA27	3.31999e-299	-0.355836	0.147	0.367	5.17819e-295	CA27_dura_inner_skull_14	MYO19	NA	NA	NA	NA	NA	NA	NA
CA27	0	0.405783	0.854	0.618	0	CA27_dura_inner_skull_14	MYO6	NA	NA	NA	NA	NA	NA	NA
CA27	2.70758e-304	-0.274787	0.22	0.447	4.22301e-300	CA27_dura_inner_skull_14	NAA25	NA	NA	NA	NA	NA	NA	NA
CA27	1.47447e-261	-0.321607	0.148	0.351	2.29974e-257	CA27_dura_inner_skull_14	NAA38	NA	NA	NA	NA	NA	NA	NA
CA27	6.2179e-185	-0.561967	0.935	0.856	9.69805e-181	CA27_dura_inner_skull_14	NAALADL2	NA	NA	NA	NA	NA	NA	NA
CA27	0	-0.502797	0.234	0.547	0	CA27_dura_inner_skull_14	NADK2	NA	NA	NA	NA	NA	NA	NA
CA27	8.89067e-209	0.577194	0.941	0.858	1.38668e-204	CA27_dura_inner_skull_14	NAMPT	NA	NA	NA	NA	NA	NA	NA
CA27	1.87495e-207	-0.254304	0.84	0.825	2.92437e-203	CA27_dura_inner_skull_14	NAP1L1	NA	NA	NA	NA	NA	NA	NA
CA27	3.58764e-292	-0.299397	0.311	0.552	5.59565e-288	CA27_dura_inner_skull_14	NAP1L4	NA	NA	NA	NA	NA	NA	NA
CA27	0	-1.92739	0.175	0.78	0	CA27_dura_inner_skull_14	NAV1	NA	NA	NA	NA	NA	NA	NA
CA27	0	0.7888	0.377	0.119	0	CA27_dura_inner_skull_14	NAV3	NA	NA	NA	NA	NA	NA	NA
CA27	0	-0.360511	0.127	0.36	0	CA27_dura_inner_skull_14	NBPF11	NA	NA	NA	NA	NA	NA	NA
CA27	1.62053531835929e-321	-0.327624	0.103	0.312	2.52754893604498e-317	CA27_dura_inner_skull_14	NBPF12	NA	NA	NA	NA	NA	NA	NA
CA27	0	-1.69956	0.313	0.537	0	CA27_dura_inner_skull_14	NCAM2	NA	NA	NA	NA	NA	NA	NA
CA27	2.38487e-245	-0.266274	0.353	0.567	3.71969e-241	CA27_dura_inner_skull_14	NCOA1	NA	NA	NA	NA	NA	NA	NA
CA27	2.89655e-249	0.313813	0.999	0.975	4.51775e-245	CA27_dura_inner_skull_14	NCOA2	NA	NA	NA	NA	NA	NA	NA
CA27	2.54126e-239	-0.306787	0.249	0.466	3.9636e-235	CA27_dura_inner_skull_14	NCOA5	NA	NA	NA	NA	NA	NA	NA
CA27	0	-0.405832	0.064	0.261	0	CA27_dura_inner_skull_14	NCOA7	NA	NA	NA	NA	NA	NA	NA
CA27	0	0.891229	0.999	0.966	0	CA27_dura_inner_skull_14	NCOR1	NA	NA	NA	NA	NA	NA	NA
CA27	0	-0.370627	0.184	0.436	0	CA27_dura_inner_skull_14	NCOR2	NA	NA	NA	NA	NA	NA	NA
CA27	1.44626e-204	-0.474042	0.63	0.77	2.25573e-200	CA27_dura_inner_skull_14	NDUFAF6	NA	NA	NA	NA	NA	NA	NA
CA27	1.63879e-180	-0.26542	0.21	0.387	2.55603e-176	CA27_dura_inner_skull_14	NDUFV1	NA	NA	NA	NA	NA	NA	NA
CA27	3.4204e-257	-0.251481	0.186	0.387	5.3348e-253	CA27_dura_inner_skull_14	NDUFV2	NA	NA	NA	NA	NA	NA	NA
CA27	2.66347e-253	-0.261809	0.057	0.216	4.15421e-249	CA27_dura_inner_skull_14	NEAT1	NA	NA	NA	NA	NA	NA	NA
CA27	1.34532e-221	-0.486773	0.108	0.278	2.09829e-217	CA27_dura_inner_skull_14	NEBL	NA	NA	NA	NA	NA	NA	NA
CA27	3.43499e-187	0.297791	1	0.983	5.35756e-183	CA27_dura_inner_skull_14	NEDD4L	NA	NA	NA	NA	NA	NA	NA
CA27	8.2729e-244	-0.304784	0.191	0.397	1.29032e-239	CA27_dura_inner_skull_14	NEK11	NA	NA	NA	NA	NA	NA	NA
CA27	2.53182377601273e-312	-0.307902	0.085	0.282	3.94889e-308	CA27_dura_inner_skull_14	NEK9	NA	NA	NA	NA	NA	NA	NA
CA27	9.1345e-217	-0.303103	0.163	0.351	1.42471e-212	CA27_dura_inner_skull_14	NETO2	NA	NA	NA	NA	NA	NA	NA
CA27	0	1.00196	0.999	0.899	0	CA27_dura_inner_skull_14	NFIB	NA	NA	NA	NA	NA	NA	NA
CA27	0	-0.619568	0.214	0.589	0	CA27_dura_inner_skull_14	NFIC	NA	NA	NA	NA	NA	NA	NA
CA27	0	-0.449447	0.192	0.472	0	CA27_dura_inner_skull_14	NFIX	NA	NA	NA	NA	NA	NA	NA
CA27	1.75201e-190	-0.311134	0.139	0.307	2.73262e-186	CA27_dura_inner_skull_14	NHSL1	NA	NA	NA	NA	NA	NA	NA
CA27	0	-0.907916	0.049	0.418	0	CA27_dura_inner_skull_14	NIBAN1	NA	NA	NA	NA	NA	NA	NA
CA27	0	0.678559	0.572	0.373	0	CA27_dura_inner_skull_14	NIPAL3	NA	NA	NA	NA	NA	NA	NA
CA27	1.08925e-215	-0.279441	0.206	0.403	1.6989e-211	CA27_dura_inner_skull_14	NIPSNAP2	NA	NA	NA	NA	NA	NA	NA
CA27	4.48484e-163	0.367958	0.173	0.065	6.99501e-159	CA27_dura_inner_skull_14	NKAIN2	NA	NA	NA	NA	NA	NA	NA
CA27	0	0.687888	0.732	0.558	0	CA27_dura_inner_skull_14	NLGN1	NA	NA	NA	NA	NA	NA	NA
CA27	3.11755422525827e-321	-0.352385	0.046	0.22	4.86244932513532e-317	CA27_dura_inner_skull_14	NNMT	NA	NA	NA	NA	NA	NA	NA
CA27	4.47315e-177	-0.399836	0.729	0.812	6.97677e-173	CA27_dura_inner_skull_14	NOS1AP	NA	NA	NA	NA	NA	NA	NA
CA27	0	0.571535	0.623	0.448	0	CA27_dura_inner_skull_14	NOTCH2NLC	NA	NA	NA	NA	NA	NA	NA
CA27	0	-0.44634	0.051	0.243	0	CA27_dura_inner_skull_14	NPAS2	NA	NA	NA	NA	NA	NA	NA
CA27	0	-0.38341	0.208	0.468	0	CA27_dura_inner_skull_14	NPLOC4	NA	NA	NA	NA	NA	NA	NA
CA27	5.05594e-161	-0.322923	0.149	0.303	7.88575e-157	CA27_dura_inner_skull_14	NPNT	NA	NA	NA	NA	NA	NA	NA
CA27	0	-0.399989	0.124	0.374	0	CA27_dura_inner_skull_14	NPRL3	NA	NA	NA	NA	NA	NA	NA
CA27	2.82704e-260	-0.439073	0.214	0.435	4.40933e-256	CA27_dura_inner_skull_14	NR3C1	NA	NA	NA	NA	NA	NA	NA
CA27	2.90763e-194	0.323144	0.509	0.461	4.53503e-190	CA27_dura_inner_skull_14	NR6A1	NA	NA	NA	NA	NA	NA	NA
CA27	0	-0.426665	0.409	0.699	0	CA27_dura_inner_skull_14	NRF1	NA	NA	NA	NA	NA	NA	NA
CA27	1.04585e-287	0.703076	0.528	0.323	1.63122e-283	CA27_dura_inner_skull_14	NRG3	NA	NA	NA	NA	NA	NA	NA
CA27	1.40672e-205	-0.251494	0.406	0.604	2.19406e-201	CA27_dura_inner_skull_14	NRIP1	NA	NA	NA	NA	NA	NA	NA
CA27	1.64355e-33	-0.378931	0.343	0.406	2.56345e-29	CA27_dura_inner_skull_14	NRXN3	NA	NA	NA	NA	NA	NA	NA
CA27	9.58483e-307	-0.473605	0.585	0.779	1.49495e-302	CA27_dura_inner_skull_14	NSD2	NA	NA	NA	NA	NA	NA	NA
CA27	3.55837e-256	-0.259636	0.056	0.213	5.55e-252	CA27_dura_inner_skull_14	NSMCE1	NA	NA	NA	NA	NA	NA	NA
CA27	0	-0.310241	0.266	0.529	0	CA27_dura_inner_skull_14	NSRP1	NA	NA	NA	NA	NA	NA	NA
CA27	1.24421e-236	-0.301751	0.184	0.388	1.94059e-232	CA27_dura_inner_skull_14	NT5C3A	NA	NA	NA	NA	NA	NA	NA
CA27	4.51203e-144	-0.272149	0.094	0.221	7.03742e-140	CA27_dura_inner_skull_14	NT5DC3	NA	NA	NA	NA	NA	NA	NA
CA27	0	-0.424043	0.089	0.329	0	CA27_dura_inner_skull_14	NUCB2	NA	NA	NA	NA	NA	NA	NA
CA27	0	-0.494701	0.323	0.644	0	CA27_dura_inner_skull_14	NUCKS1	NA	NA	NA	NA	NA	NA	NA
CA27	2.39269e-224	-0.292921	0.452	0.667	3.73188e-220	CA27_dura_inner_skull_14	NUDCD3	NA	NA	NA	NA	NA	NA	NA
CA27	1.14376e-240	-0.296207	0.197	0.405	1.78393e-236	CA27_dura_inner_skull_14	NUFIP2	NA	NA	NA	NA	NA	NA	NA
CA27	0	-0.480525	0.118	0.407	0	CA27_dura_inner_skull_14	NUP210	NA	NA	NA	NA	NA	NA	NA
CA27	0	-0.39036	0.175	0.433	0	CA27_dura_inner_skull_14	NUP42	NA	NA	NA	NA	NA	NA	NA
CA27	1.34141e-217	-0.259258	0.091	0.251	2.0922e-213	CA27_dura_inner_skull_14	NUP50-DT	NA	NA	NA	NA	NA	NA	NA
CA27	1.11338e-292	-0.307995	0.206	0.438	1.73654e-288	CA27_dura_inner_skull_14	NUP58	NA	NA	NA	NA	NA	NA	NA
CA27	0	-0.44745	0.301	0.622	0	CA27_dura_inner_skull_14	NUTM2B-AS1	NA	NA	NA	NA	NA	NA	NA
CA27	1.27749e-284	-0.277596	0.25	0.48	1.9925e-280	CA27_dura_inner_skull_14	OCIAD1	NA	NA	NA	NA	NA	NA	NA
CA27	0	0.696845	0.548	0.338	0	CA27_dura_inner_skull_14	OCRL	NA	NA	NA	NA	NA	NA	NA
CA27	3.14411e-294	-0.335195	0.188	0.419	4.90388e-290	CA27_dura_inner_skull_14	OGDH	NA	NA	NA	NA	NA	NA	NA
CA27	6.30308e-98	0.260739	0.6	0.56	9.83092e-94	CA27_dura_inner_skull_14	OPHN1	NA	NA	NA	NA	NA	NA	NA
CA27	0	-0.571124	0.002	0.307	0	CA27_dura_inner_skull_14	OR51E2	NA	NA	NA	NA	NA	NA	NA
CA27	0	0.747206	0.76	0.475	0	CA27_dura_inner_skull_14	ORC5	NA	NA	NA	NA	NA	NA	NA
CA27	5.04814e-281	-0.495288	0.111	0.307	7.87358e-277	CA27_dura_inner_skull_14	OSMR	NA	NA	NA	NA	NA	NA	NA
CA27	1.68994660094353e-318	-0.407418	0.08	0.276	2.63580971349162e-314	CA27_dura_inner_skull_14	OSMR-AS1	NA	NA	NA	NA	NA	NA	NA
CA27	3.23025e-217	-0.291892	0.204	0.403	5.03822e-213	CA27_dura_inner_skull_14	OTUD7B	NA	NA	NA	NA	NA	NA	NA
CA27	1.58431e-161	-0.254657	0.23	0.4	2.47106e-157	CA27_dura_inner_skull_14	OXCT1	NA	NA	NA	NA	NA	NA	NA
CA27	2.62411e-254	0.288337	0.908	0.729	4.09283e-250	CA27_dura_inner_skull_14	P4HA1	NA	NA	NA	NA	NA	NA	NA
CA27	3.32876e-292	-0.331479	0.122	0.324	5.19186e-288	CA27_dura_inner_skull_14	P4HB	NA	NA	NA	NA	NA	NA	NA
CA27	8.54569e-298	-0.261828	0.331	0.566	1.33287e-293	CA27_dura_inner_skull_14	PABPC1	NA	NA	NA	NA	NA	NA	NA
CA27	9.50021e-270	-0.310689	0.133	0.333	1.48175e-265	CA27_dura_inner_skull_14	PACS2	NA	NA	NA	NA	NA	NA	NA
CA27	1.11944e-210	-0.251539	0.138	0.315	1.74599e-206	CA27_dura_inner_skull_14	PAIP2	NA	NA	NA	NA	NA	NA	NA
CA27	0	0.702768	0.982	0.86	0	CA27_dura_inner_skull_14	PARD3B	NA	NA	NA	NA	NA	NA	NA
CA27	7.76085e-226	-0.25287	0.168	0.36	1.21046e-221	CA27_dura_inner_skull_14	PARG	NA	NA	NA	NA	NA	NA	NA
CA27	3.95363e-291	-0.269665	0.175	0.388	6.16648e-287	CA27_dura_inner_skull_14	PARN	NA	NA	NA	NA	NA	NA	NA
CA27	2.16682e-237	-0.282538	0.091	0.263	3.37959e-233	CA27_dura_inner_skull_14	PARP14	NA	NA	NA	NA	NA	NA	NA
CA27	0	0.510115	0.889	0.713	0	CA27_dura_inner_skull_14	PARP8	NA	NA	NA	NA	NA	NA	NA
CA27	2.83912e-73	0.250829	0.273	0.198	4.42818e-69	CA27_dura_inner_skull_14	PBX1	NA	NA	NA	NA	NA	NA	NA
CA27	2.10384e-217	0.297773	0.907	0.746	3.28136e-213	CA27_dura_inner_skull_14	PBX3	NA	NA	NA	NA	NA	NA	NA
CA27	0	-1.581	0.066	0.557	0	CA27_dura_inner_skull_14	PCA3	NA	NA	NA	NA	NA	NA	NA
CA27	0	-0.806792	0.586	0.79	0	CA27_dura_inner_skull_14	PCAT1	NA	NA	NA	NA	NA	NA	NA
CA27	0	-1.78948	0.009	0.536	0	CA27_dura_inner_skull_14	PCAT4	NA	NA	NA	NA	NA	NA	NA
CA27	2.04128e-306	-0.334849	0.16	0.388	3.18378e-302	CA27_dura_inner_skull_14	PCBD2	NA	NA	NA	NA	NA	NA	NA
CA27	2.59528e-299	-0.268351	0.229	0.457	4.04786e-295	CA27_dura_inner_skull_14	PCBP2	NA	NA	NA	NA	NA	NA	NA
CA27	7.27941e-35	-0.445388	0.059	0.101	1.13537e-30	CA27_dura_inner_skull_14	PCDH9	NA	NA	NA	NA	NA	NA	NA
CA27	0	0.869743	0.95	0.735	0	CA27_dura_inner_skull_14	PCLO	NA	NA	NA	NA	NA	NA	NA
CA27	3.7695e-241	-0.294935	0.161	0.359	5.87929e-237	CA27_dura_inner_skull_14	PCNP	NA	NA	NA	NA	NA	NA	NA
CA27	6.53463e-198	-0.263349	0.132	0.302	1.01921e-193	CA27_dura_inner_skull_14	PCNX2	NA	NA	NA	NA	NA	NA	NA
CA27	0	-0.462924	0.145	0.386	0	CA27_dura_inner_skull_14	PCSK6	NA	NA	NA	NA	NA	NA	NA
CA27	0	-0.355548	0.128	0.357	0	CA27_dura_inner_skull_14	PDCD4	NA	NA	NA	NA	NA	NA	NA
CA27	0	1.38448	0.737	0.32	0	CA27_dura_inner_skull_14	PDE10A	NA	NA	NA	NA	NA	NA	NA
CA27	1.08512e-172	-0.252152	0.063	0.191	1.69246e-168	CA27_dura_inner_skull_14	PDE4B	NA	NA	NA	NA	NA	NA	NA
CA27	7.74849e-237	-0.699384	1	0.993	1.20853e-232	CA27_dura_inner_skull_14	PDE4D	NA	NA	NA	NA	NA	NA	NA
CA27	2.66405e-274	-0.338877	0.334	0.571	4.15512e-270	CA27_dura_inner_skull_14	PDE7A	NA	NA	NA	NA	NA	NA	NA
CA27	3.71874e-234	-0.330849	0.328	0.547	5.80011e-230	CA27_dura_inner_skull_14	PDE8A	NA	NA	NA	NA	NA	NA	NA
CA27	9.25279e-84	0.255244	0.26	0.198	1.44316e-79	CA27_dura_inner_skull_14	PDGFC	NA	NA	NA	NA	NA	NA	NA
CA27	4.12007e-238	-0.281384	0.112	0.294	6.42607e-234	CA27_dura_inner_skull_14	PDIA5	NA	NA	NA	NA	NA	NA	NA
CA27	0	-0.846658	0.014	0.24	0	CA27_dura_inner_skull_14	PDK4	NA	NA	NA	NA	NA	NA	NA
CA27	0	0.617027	0.998	0.956	0	CA27_dura_inner_skull_14	PDLIM5	NA	NA	NA	NA	NA	NA	NA
CA27	5.98009e-161	-0.313335	0.994	0.972	9.32714e-157	CA27_dura_inner_skull_14	PDS5B	NA	NA	NA	NA	NA	NA	NA
CA27	6.01678e-130	0.268411	0.535	0.452	9.38438e-126	CA27_dura_inner_skull_14	PDSS2	NA	NA	NA	NA	NA	NA	NA
CA27	2.12432e-291	-0.262825	0.325	0.558	3.3133e-287	CA27_dura_inner_skull_14	PDXDC1	NA	NA	NA	NA	NA	NA	NA
CA27	2.20891e-206	-0.672074	0.507	0.687	3.44524e-202	CA27_dura_inner_skull_14	PDZRN3	NA	NA	NA	NA	NA	NA	NA
CA27	6.49935e-169	-0.257391	0.074	0.202	1.0137e-164	CA27_dura_inner_skull_14	PELI1	NA	NA	NA	NA	NA	NA	NA
CA27	1.03771e-279	-0.279947	0.08	0.26	1.61852e-275	CA27_dura_inner_skull_14	PEX6	NA	NA	NA	NA	NA	NA	NA
CA27	6.75047e-125	-0.306206	0.058	0.158	1.05287e-120	CA27_dura_inner_skull_14	PFKFB4	NA	NA	NA	NA	NA	NA	NA
CA27	0	-1.19274	0.268	0.719	0	CA27_dura_inner_skull_14	PHACTR2	NA	NA	NA	NA	NA	NA	NA
CA27	6.42626e-240	-0.260434	0.08	0.245	1.0023e-235	CA27_dura_inner_skull_14	PHF12	NA	NA	NA	NA	NA	NA	NA
CA27	0	0.426424	0.992	0.901	0	CA27_dura_inner_skull_14	PHF14	NA	NA	NA	NA	NA	NA	NA
CA27	0	-0.378036	0.788	0.79	0	CA27_dura_inner_skull_14	PHF20	NA	NA	NA	NA	NA	NA	NA
CA27	0	0.45499	0.809	0.567	0	CA27_dura_inner_skull_14	PHLPP1	NA	NA	NA	NA	NA	NA	NA
CA27	0	0.866296	0.983	0.766	0	CA27_dura_inner_skull_14	PHTF2	NA	NA	NA	NA	NA	NA	NA
CA27	3.98873e-237	-0.299357	0.307	0.528	6.22122e-233	CA27_dura_inner_skull_14	PHYKPL	NA	NA	NA	NA	NA	NA	NA
CA27	4.68858e-203	-0.257933	0.21	0.401	7.31278e-199	CA27_dura_inner_skull_14	PI4KA	NA	NA	NA	NA	NA	NA	NA
CA27	1.65307e-264	-0.329348	0.188	0.405	2.57829e-260	CA27_dura_inner_skull_14	PIGL	NA	NA	NA	NA	NA	NA	NA
CA27	3.76516e-227	-0.286855	0.18	0.379	5.87252e-223	CA27_dura_inner_skull_14	PIGU	NA	NA	NA	NA	NA	NA	NA
CA27	4.13625e-262	0.40697	0.31	0.201	6.4513e-258	CA27_dura_inner_skull_14	PIK3R1	NA	NA	NA	NA	NA	NA	NA
CA27	0	-0.431237	0.375	0.678	0	CA27_dura_inner_skull_14	PIP5K1A	NA	NA	NA	NA	NA	NA	NA
CA27	4.04447e-182	-0.340713	0.065	0.199	6.30817e-178	CA27_dura_inner_skull_14	PIP5K1B	NA	NA	NA	NA	NA	NA	NA
CA27	5.64182e-287	-0.346088	0.233	0.468	8.79954e-283	CA27_dura_inner_skull_14	PITPNA	NA	NA	NA	NA	NA	NA	NA
CA27	8.89318162514244e-322	-0.387689	0.159	0.391	1.38706953807347e-317	CA27_dura_inner_skull_14	PKD2	NA	NA	NA	NA	NA	NA	NA
CA27	0	0.496011	0.465	0.337	0	CA27_dura_inner_skull_14	PKIA	NA	NA	NA	NA	NA	NA	NA
CA27	2.9679e-180	-0.332164	0.158	0.327	4.62903e-176	CA27_dura_inner_skull_14	PKIB	NA	NA	NA	NA	NA	NA	NA
CA27	0	-0.384618	0.182	0.43	0	CA27_dura_inner_skull_14	PKNOX1	NA	NA	NA	NA	NA	NA	NA
CA27	1.03199e-233	-0.258494	0.03	0.158	1.6096e-229	CA27_dura_inner_skull_14	PLAGL1	NA	NA	NA	NA	NA	NA	NA
CA27	6.95288e-295	-0.262281	0.01	0.138	1.08444e-290	CA27_dura_inner_skull_14	PLD1	NA	NA	NA	NA	NA	NA	NA
CA27	1.12351e-209	0.314207	0.2	0.066	1.75234e-205	CA27_dura_inner_skull_14	PLD5	NA	NA	NA	NA	NA	NA	NA
CA27	0	0.58631	0.784	0.49	0	CA27_dura_inner_skull_14	PLEKHA5	NA	NA	NA	NA	NA	NA	NA
CA27	0	-0.546127	0.15	0.45	0	CA27_dura_inner_skull_14	PLEKHA6	NA	NA	NA	NA	NA	NA	NA
CA27	0	-0.399736	0.424	0.689	0	CA27_dura_inner_skull_14	PLEKHA7	NA	NA	NA	NA	NA	NA	NA
CA27	0	1.02314	0.769	0.457	0	CA27_dura_inner_skull_14	PLEKHB2	NA	NA	NA	NA	NA	NA	NA
CA27	9.04655e-203	0.532799	0.513	0.393	1.41099e-198	CA27_dura_inner_skull_14	PLOD2	NA	NA	NA	NA	NA	NA	NA
CA27	0	0.737655	1	0.994	0	CA27_dura_inner_skull_14	PLPP1	NA	NA	NA	NA	NA	NA	NA
CA27	0	0.592406	0.97	0.808	0	CA27_dura_inner_skull_14	PMEPA1	NA	NA	NA	NA	NA	NA	NA
CA27	1.55517e-239	-0.26953	0.099	0.275	2.42559e-235	CA27_dura_inner_skull_14	PMF1	NA	NA	NA	NA	NA	NA	NA
CA27	7.0181e-192	-0.252312	0.132	0.299	1.09461e-187	CA27_dura_inner_skull_14	POC1B	NA	NA	NA	NA	NA	NA	NA
CA27	4.74762e-205	-0.323738	0.499	0.696	7.40486e-201	CA27_dura_inner_skull_14	POGZ	NA	NA	NA	NA	NA	NA	NA
CA27	1.54749e-156	-0.342346	0.341	0.52	2.41362e-152	CA27_dura_inner_skull_14	POLA1	NA	NA	NA	NA	NA	NA	NA
CA27	0	-0.37589	0.113	0.331	0	CA27_dura_inner_skull_14	POLE2	NA	NA	NA	NA	NA	NA	NA
CA27	0	-0.314718	0.266	0.521	0	CA27_dura_inner_skull_14	POM121	NA	NA	NA	NA	NA	NA	NA
CA27	0	0.721241	0.731	0.421	0	CA27_dura_inner_skull_14	POTEJ	NA	NA	NA	NA	NA	NA	NA
CA27	2.50855e-243	-0.276965	0.229	0.44	3.91258e-239	CA27_dura_inner_skull_14	PPFIA1	NA	NA	NA	NA	NA	NA	NA
CA27	0	-2.0644	0.008	0.434	0	CA27_dura_inner_skull_14	PPFIA2	NA	NA	NA	NA	NA	NA	NA
CA27	0	-0.293285	0.28	0.537	0	CA27_dura_inner_skull_14	PPHLN1	NA	NA	NA	NA	NA	NA	NA
CA27	2.28886e-87	0.257107	0.557	0.494	3.56994e-83	CA27_dura_inner_skull_14	PPM1E	NA	NA	NA	NA	NA	NA	NA
CA27	2.79311e-284	0.279857	0.898	0.702	4.35641e-280	CA27_dura_inner_skull_14	PPP1R12A	NA	NA	NA	NA	NA	NA	NA
CA27	0	-0.360477	0.022	0.222	0	CA27_dura_inner_skull_14	PPP2R2C	NA	NA	NA	NA	NA	NA	NA
CA27	0	0.443145	0.446	0.36	0	CA27_dura_inner_skull_14	PPP2R3A	NA	NA	NA	NA	NA	NA	NA
CA27	0	0.924945	1	0.999	0	CA27_dura_inner_skull_14	PPP3CA	NA	NA	NA	NA	NA	NA	NA
CA27	4.49418e-260	-0.296328	0.25	0.471	7.00957e-256	CA27_dura_inner_skull_14	PPP6R2	NA	NA	NA	NA	NA	NA	NA
CA27	6.62826028840828e-311	-0.303859	0.092	0.294	1.03381e-306	CA27_dura_inner_skull_14	PRCC	NA	NA	NA	NA	NA	NA	NA
CA27	3.05979e-256	-0.256011	0.064	0.227	4.77235e-252	CA27_dura_inner_skull_14	PRDM10	NA	NA	NA	NA	NA	NA	NA
CA27	9.46222e-85	-0.252292	0.068	0.152	1.47582e-80	CA27_dura_inner_skull_14	PRELID2	NA	NA	NA	NA	NA	NA	NA
CA27	0	-0.356267	0.3	0.564	0	CA27_dura_inner_skull_14	PRKAA1	NA	NA	NA	NA	NA	NA	NA
CA27	7.60629e-273	-0.317797	0.094	0.283	1.18635e-268	CA27_dura_inner_skull_14	PRKAA2	NA	NA	NA	NA	NA	NA	NA
CA27	7.22603e-197	0.364017	0.494	0.417	1.12704e-192	CA27_dura_inner_skull_14	PRKAG2	NA	NA	NA	NA	NA	NA	NA
CA27	0	0.529564	0.986	0.86	0	CA27_dura_inner_skull_14	PRKCA	NA	NA	NA	NA	NA	NA	NA
CA27	3.81957e-260	-0.315049	0.036	0.182	5.95739e-256	CA27_dura_inner_skull_14	PRKN	NA	NA	NA	NA	NA	NA	NA
CA27	0	-0.35676	0.378	0.639	0	CA27_dura_inner_skull_14	PRKRIP1	NA	NA	NA	NA	NA	NA	NA
CA27	1.77633e-125	-0.251168	0.144	0.279	2.77055e-121	CA27_dura_inner_skull_14	PRLR	NA	NA	NA	NA	NA	NA	NA
CA27	8.13082e-204	-0.268698	0.128	0.299	1.26816e-199	CA27_dura_inner_skull_14	PRORP	NA	NA	NA	NA	NA	NA	NA
CA27	0	-0.364598	0.116	0.367	0	CA27_dura_inner_skull_14	PRPF3	NA	NA	NA	NA	NA	NA	NA
CA27	8.06903e-269	-0.313698	0.12	0.318	1.25853e-264	CA27_dura_inner_skull_14	PRPF40B	NA	NA	NA	NA	NA	NA	NA
CA27	0	-0.9494	0.275	0.688	0	CA27_dura_inner_skull_14	PRUNE2	NA	NA	NA	NA	NA	NA	NA
CA27	1.86568e-210	-0.252308	0.11	0.277	2.9099e-206	CA27_dura_inner_skull_14	PSMA3	NA	NA	NA	NA	NA	NA	NA
CA27	2.7334e-307	-0.282315	0.066	0.252	4.26328e-303	CA27_dura_inner_skull_14	PSMD4	NA	NA	NA	NA	NA	NA	NA
CA27	0	-0.343168	0.065	0.273	0	CA27_dura_inner_skull_14	PSPH	NA	NA	NA	NA	NA	NA	NA
CA27	0	-0.347758	0.299	0.561	0	CA27_dura_inner_skull_14	PTGES3	NA	NA	NA	NA	NA	NA	NA
CA27	2.43975544704158e-318	0.42742	0.368	0.242	3.80528657075075e-314	CA27_dura_inner_skull_14	PTGR1	NA	NA	NA	NA	NA	NA	NA
CA27	0	-0.812072	0.108	0.53	0	CA27_dura_inner_skull_14	PTPN13	NA	NA	NA	NA	NA	NA	NA
CA27	0	0.759409	0.722	0.427	0	CA27_dura_inner_skull_14	PTPN21	NA	NA	NA	NA	NA	NA	NA
CA27	0	-0.430587	0.142	0.401	0	CA27_dura_inner_skull_14	PTPN9	NA	NA	NA	NA	NA	NA	NA
CA27	2.7288e-181	0.264575	0.82	0.646	4.25611e-177	CA27_dura_inner_skull_14	PTPRG	NA	NA	NA	NA	NA	NA	NA
CA27	0	0.782593	0.815	0.408	0	CA27_dura_inner_skull_14	PTPRM	NA	NA	NA	NA	NA	NA	NA
CA27	0	-0.839249	0.089	0.373	0	CA27_dura_inner_skull_14	PTPRN2	NA	NA	NA	NA	NA	NA	NA
CA27	2.74814e-249	-0.286769	0.117	0.299	4.28627e-245	CA27_dura_inner_skull_14	PTPRS	NA	NA	NA	NA	NA	NA	NA
CA27	0	-1.96928	0.01	0.346	0	CA27_dura_inner_skull_14	PTPRT	NA	NA	NA	NA	NA	NA	NA
CA27	0	-0.302631	0.061	0.257	0	CA27_dura_inner_skull_14	PURA	NA	NA	NA	NA	NA	NA	NA
CA27	3.29743e-205	-0.255639	0.251	0.444	5.14301e-201	CA27_dura_inner_skull_14	PUS7	NA	NA	NA	NA	NA	NA	NA
CA27	0	-0.717852	0.986	0.971	0	CA27_dura_inner_skull_14	PVT1	NA	NA	NA	NA	NA	NA	NA
CA27	0	0.458639	0.915	0.678	0	CA27_dura_inner_skull_14	QKI	NA	NA	NA	NA	NA	NA	NA
CA27	0	-0.527223	0.971	0.959	0	CA27_dura_inner_skull_14	R3HDM2	NA	NA	NA	NA	NA	NA	NA
CA27	9.04658e-265	-0.287085	0.852	0.807	1.411e-260	CA27_dura_inner_skull_14	RAB10	NA	NA	NA	NA	NA	NA	NA
CA27	0	-0.419229	0.177	0.44	0	CA27_dura_inner_skull_14	RAB11FIP3	NA	NA	NA	NA	NA	NA	NA
CA27	5.1926e-228	-0.26638	0.185	0.383	8.09891e-224	CA27_dura_inner_skull_14	RAB30-DT	NA	NA	NA	NA	NA	NA	NA
CA27	3.18478e-269	-0.251526	0.05	0.208	4.9673e-265	CA27_dura_inner_skull_14	RAB40C	NA	NA	NA	NA	NA	NA	NA
CA27	0	-0.376213	0.931	0.891	0	CA27_dura_inner_skull_14	RABGAP1L	NA	NA	NA	NA	NA	NA	NA
CA27	1.06532e-220	-0.311106	0.16	0.34	1.66158e-216	CA27_dura_inner_skull_14	RABL6	NA	NA	NA	NA	NA	NA	NA
CA27	3.57269e-231	-0.289603	0.158	0.348	5.57233e-227	CA27_dura_inner_skull_14	RAC1	NA	NA	NA	NA	NA	NA	NA
CA27	3.53535e-179	0.272503	0.763	0.59	5.51409e-175	CA27_dura_inner_skull_14	RAD23B	NA	NA	NA	NA	NA	NA	NA
CA27	0	-0.441974	0.198	0.496	0	CA27_dura_inner_skull_14	RAD50	NA	NA	NA	NA	NA	NA	NA
CA27	0	-0.434052	0.145	0.409	0	CA27_dura_inner_skull_14	RAD9A	NA	NA	NA	NA	NA	NA	NA
CA27	0	-0.360469	0.12	0.338	0	CA27_dura_inner_skull_14	RAI1	NA	NA	NA	NA	NA	NA	NA
CA27	4.2273e-194	-0.354497	0.289	0.487	6.59332e-190	CA27_dura_inner_skull_14	RAI14	NA	NA	NA	NA	NA	NA	NA
CA27	9.38243e-264	0.347323	0.959	0.828	1.46338e-259	CA27_dura_inner_skull_14	RALGPS2	NA	NA	NA	NA	NA	NA	NA
CA27	2.91715e-245	-0.280551	0.024	0.152	4.54989e-241	CA27_dura_inner_skull_14	RANBP3L	NA	NA	NA	NA	NA	NA	NA
CA27	0	-0.399515	0.131	0.373	0	CA27_dura_inner_skull_14	RAP1GAP2	NA	NA	NA	NA	NA	NA	NA
CA27	1.0735e-214	-0.270368	0.184	0.375	1.67433e-210	CA27_dura_inner_skull_14	RAPGEF1	NA	NA	NA	NA	NA	NA	NA
CA27	1.53901e-265	0.538423	0.558	0.434	2.4004e-261	CA27_dura_inner_skull_14	RARB	NA	NA	NA	NA	NA	NA	NA
CA27	2.29516e-216	-0.413788	0.36	0.573	3.57977e-212	CA27_dura_inner_skull_14	RASSF3	NA	NA	NA	NA	NA	NA	NA
CA27	3.56988e-233	-0.251951	0.127	0.31	5.56794e-229	CA27_dura_inner_skull_14	RBBP4	NA	NA	NA	NA	NA	NA	NA
CA27	4.04811e-252	-0.310098	0.171	0.377	6.31384e-248	CA27_dura_inner_skull_14	RBBP6	NA	NA	NA	NA	NA	NA	NA
CA27	1.70350216120418e-311	-0.371387	0.19	0.429	2.65695e-307	CA27_dura_inner_skull_14	RBL1	NA	NA	NA	NA	NA	NA	NA
CA27	1.14935e-179	-0.262858	0.979	0.933	1.79264e-175	CA27_dura_inner_skull_14	RBM47	NA	NA	NA	NA	NA	NA	NA
CA27	2.30659e-86	-0.581012	0.257	0.374	3.5976e-82	CA27_dura_inner_skull_14	RBMS3	NA	NA	NA	NA	NA	NA	NA
CA27	4.36233e-170	-0.317291	0.637	0.766	6.80393e-166	CA27_dura_inner_skull_14	RC3H1	NA	NA	NA	NA	NA	NA	NA
CA27	2.42092e-280	-0.311339	0.241	0.469	3.77592e-276	CA27_dura_inner_skull_14	REEP3	NA	NA	NA	NA	NA	NA	NA
CA27	0	-1.30356	0.211	0.578	0	CA27_dura_inner_skull_14	RELN	NA	NA	NA	NA	NA	NA	NA
CA27	2.56605e-217	-0.264159	0.065	0.214	4.00226e-213	CA27_dura_inner_skull_14	REPS2	NA	NA	NA	NA	NA	NA	NA
CA27	5.90172e-159	0.292077	0.323	0.242	9.20491e-155	CA27_dura_inner_skull_14	RETREG1	NA	NA	NA	NA	NA	NA	NA
CA27	1.33554e-264	-0.255543	0.256	0.47	2.08304e-260	CA27_dura_inner_skull_14	REV1	NA	NA	NA	NA	NA	NA	NA
CA27	0	-0.483491	0.126	0.387	0	CA27_dura_inner_skull_14	REXO2	NA	NA	NA	NA	NA	NA	NA
CA27	1.81143e-268	-0.421682	0.116	0.312	2.82529e-264	CA27_dura_inner_skull_14	RFC3	NA	NA	NA	NA	NA	NA	NA
CA27	0	-0.401235	0.192	0.46	0	CA27_dura_inner_skull_14	RFFL	NA	NA	NA	NA	NA	NA	NA
CA27	5.31539e-228	-0.37606	0.136	0.322	8.29041e-224	CA27_dura_inner_skull_14	RFLNA	NA	NA	NA	NA	NA	NA	NA
CA27	0	-0.594006	0.09	0.385	0	CA27_dura_inner_skull_14	RFX6	NA	NA	NA	NA	NA	NA	NA
CA27	0	-0.433757	0.06	0.285	0	CA27_dura_inner_skull_14	RGL1	NA	NA	NA	NA	NA	NA	NA
CA27	1.61177e-259	-0.291644	0.131	0.331	2.51388e-255	CA27_dura_inner_skull_14	RHOA	NA	NA	NA	NA	NA	NA	NA
CA27	0	-1.65682	0.291	0.707	0	CA27_dura_inner_skull_14	RHOBTB1	NA	NA	NA	NA	NA	NA	NA
CA27	0	-0.408035	0.099	0.313	0	CA27_dura_inner_skull_14	RHOBTB3	NA	NA	NA	NA	NA	NA	NA
CA27	1.03549e-228	-0.286201	0.17	0.367	1.61505e-224	CA27_dura_inner_skull_14	RHOT1	NA	NA	NA	NA	NA	NA	NA
CA27	1.03194e-226	0.317182	0.858	0.676	1.60952e-222	CA27_dura_inner_skull_14	RHPN2	NA	NA	NA	NA	NA	NA	NA
CA27	0	-0.652772	0.329	0.623	0	CA27_dura_inner_skull_14	RIC8B	NA	NA	NA	NA	NA	NA	NA
CA27	0	-0.362301	0.076	0.299	0	CA27_dura_inner_skull_14	RILPL1	NA	NA	NA	NA	NA	NA	NA
CA27	2.87428e-225	-0.54874	0.298	0.512	4.48301e-221	CA27_dura_inner_skull_14	RIMS2	NA	NA	NA	NA	NA	NA	NA
CA27	6.3295e-221	-0.264143	0.123	0.297	9.87213e-217	CA27_dura_inner_skull_14	RMND5B	NA	NA	NA	NA	NA	NA	NA
CA27	0	0.422486	0.991	0.879	0	CA27_dura_inner_skull_14	RMST	NA	NA	NA	NA	NA	NA	NA
CA27	2.39737e-220	-0.25811	0.159	0.348	3.73918e-216	CA27_dura_inner_skull_14	RNF10	NA	NA	NA	NA	NA	NA	NA
CA27	0	-0.42326	0.301	0.601	0	CA27_dura_inner_skull_14	RNF115	NA	NA	NA	NA	NA	NA	NA
CA27	1.60644e-67	0.294295	0.588	0.59	2.50557e-63	CA27_dura_inner_skull_14	RNF144B	NA	NA	NA	NA	NA	NA	NA
CA27	1.13298e-293	-0.359818	0.158	0.38	1.76711e-289	CA27_dura_inner_skull_14	RNF149	NA	NA	NA	NA	NA	NA	NA
CA27	3.49675e-290	-0.315098	0.073	0.253	5.45388e-286	CA27_dura_inner_skull_14	RNF157	NA	NA	NA	NA	NA	NA	NA
CA27	0	-0.3937	0.152	0.391	0	CA27_dura_inner_skull_14	RNF213	NA	NA	NA	NA	NA	NA	NA
CA27	7.16676e-250	-0.394009	0.784	0.76	1.1178e-245	CA27_dura_inner_skull_14	RNF24	NA	NA	NA	NA	NA	NA	NA
CA27	0	-0.349381	0.063	0.276	0	CA27_dura_inner_skull_14	RNF34	NA	NA	NA	NA	NA	NA	NA
CA27	0	-0.520109	0.111	0.398	0	CA27_dura_inner_skull_14	RNF43	NA	NA	NA	NA	NA	NA	NA
CA27	0	-1.03688	0.042	0.297	0	CA27_dura_inner_skull_14	ROBO1	NA	NA	NA	NA	NA	NA	NA
CA27	1.23844e-199	0.377306	0.399	0.349	1.93159e-195	CA27_dura_inner_skull_14	ROR1	NA	NA	NA	NA	NA	NA	NA
CA27	1.13709e-291	-0.317876	0.119	0.324	1.77351e-287	CA27_dura_inner_skull_14	RPL31	NA	NA	NA	NA	NA	NA	NA
CA27	1.56648e-234	-0.251838	0.095	0.265	2.44324e-230	CA27_dura_inner_skull_14	RPL34	NA	NA	NA	NA	NA	NA	NA
CA27	2.93234e-223	-0.261843	0.111	0.279	4.57358e-219	CA27_dura_inner_skull_14	RPLP2	NA	NA	NA	NA	NA	NA	NA
CA27	2.84229e-286	-0.297841	0.111	0.309	4.43311e-282	CA27_dura_inner_skull_14	RPS3	NA	NA	NA	NA	NA	NA	NA
CA27	0	-0.405166	0.28	0.574	0	CA27_dura_inner_skull_14	RPS4Y1	NA	NA	NA	NA	NA	NA	NA
CA27	1.93744e-154	-0.267336	0.241	0.409	3.02183e-150	CA27_dura_inner_skull_14	RPS6KA2	NA	NA	NA	NA	NA	NA	NA
CA27	0	-0.434412	0.336	0.652	0	CA27_dura_inner_skull_14	RPTOR	NA	NA	NA	NA	NA	NA	NA
CA27	8.4896e-252	0.300228	0.749	0.53	1.32412e-247	CA27_dura_inner_skull_14	RSBN1L	NA	NA	NA	NA	NA	NA	NA
CA27	1.17686436839385e-320	-0.250193	0.001	0.114	1.83555535538389e-316	CA27_dura_inner_skull_14	RSPO3	NA	NA	NA	NA	NA	NA	NA
CA27	0	1.52411	0.917	0.473	0	CA27_dura_inner_skull_14	RTN1	NA	NA	NA	NA	NA	NA	NA
CA27	1.24876e-259	-0.300441	0.165	0.371	1.94769e-255	CA27_dura_inner_skull_14	RTN3	NA	NA	NA	NA	NA	NA	NA
CA27	0	-0.447581	0.102	0.356	0	CA27_dura_inner_skull_14	RTN4RL1	NA	NA	NA	NA	NA	NA	NA
CA27	7.78624e-273	-0.311866	0.131	0.329	1.21442e-268	CA27_dura_inner_skull_14	RUFY1	NA	NA	NA	NA	NA	NA	NA
CA27	5.33216e-105	-0.299949	0.43	0.577	8.31658e-101	CA27_dura_inner_skull_14	RUFY3	NA	NA	NA	NA	NA	NA	NA
CA27	1.04969e-132	-0.567994	0.2	0.348	1.6372e-128	CA27_dura_inner_skull_14	RUNX1	NA	NA	NA	NA	NA	NA	NA
CA27	0	-0.393105	0.109	0.324	0	CA27_dura_inner_skull_14	SAAL1	NA	NA	NA	NA	NA	NA	NA
CA27	4.75362e-193	0.368158	0.821	0.65	7.41422e-189	CA27_dura_inner_skull_14	SAMD4A	NA	NA	NA	NA	NA	NA	NA
CA27	1.83326e-97	-0.263589	0.062	0.151	2.85933e-93	CA27_dura_inner_skull_14	SAMD5	NA	NA	NA	NA	NA	NA	NA
CA27	1.33723e-239	-0.269408	0.175	0.376	2.08568e-235	CA27_dura_inner_skull_14	SAR1B	NA	NA	NA	NA	NA	NA	NA
CA27	5.77553e-253	-0.311063	0.062	0.222	9.0081e-249	CA27_dura_inner_skull_14	SCARB1	NA	NA	NA	NA	NA	NA	NA
CA27	0	-0.345757	0.13	0.349	1.61659e-304	CA27_dura_inner_skull_14	SCARB2	NA	NA	NA	NA	NA	NA	NA
CA27	7.39111e-242	-0.28027	0.118	0.305	1.15279e-237	CA27_dura_inner_skull_14	SCCPDH	NA	NA	NA	NA	NA	NA	NA
CA27	1.39508e-240	-0.278401	0.098	0.272	2.17591e-236	CA27_dura_inner_skull_14	SCYL3	NA	NA	NA	NA	NA	NA	NA
CA27	7.98016e-251	-0.286558	0.108	0.291	1.24466e-246	CA27_dura_inner_skull_14	SDCBP2-AS1	NA	NA	NA	NA	NA	NA	NA
CA27	0	0.610411	0.556	0.348	1.62977e-305	CA27_dura_inner_skull_14	SDK1	NA	NA	NA	NA	NA	NA	NA
CA27	4.62667e-235	-0.27272	0.121	0.3	7.21622e-231	CA27_dura_inner_skull_14	SELENOO	NA	NA	NA	NA	NA	NA	NA
CA27	1.65128e-245	-0.314453	0.156	0.356	2.57549e-241	CA27_dura_inner_skull_14	SEM1	NA	NA	NA	NA	NA	NA	NA
CA27	0	0.508056	0.973	0.835	0	CA27_dura_inner_skull_14	SEMA3C	NA	NA	NA	NA	NA	NA	NA
CA27	1.70845e-304	-0.319275	0.033	0.193	2.66467e-300	CA27_dura_inner_skull_14	SEMA3E	NA	NA	NA	NA	NA	NA	NA
CA27	0	-0.40474	0.09	0.299	0	CA27_dura_inner_skull_14	SEMA4B	NA	NA	NA	NA	NA	NA	NA
CA27	2.18422e-158	0.28907	0.692	0.538	3.40673e-154	CA27_dura_inner_skull_14	SEPTIN7	NA	NA	NA	NA	NA	NA	NA
CA27	0	-0.669202	0.419	0.743	0	CA27_dura_inner_skull_14	SEPTIN9	NA	NA	NA	NA	NA	NA	NA
CA27	0	-1.38884	0.587	0.808	0	CA27_dura_inner_skull_14	SERGEF	NA	NA	NA	NA	NA	NA	NA
CA27	0	-0.383747	0.044	0.216	0	CA27_dura_inner_skull_14	SERHL2	NA	NA	NA	NA	NA	NA	NA
CA27	6.39145e-248	0.425342	0.829	0.646	9.96875e-244	CA27_dura_inner_skull_14	SESN3	NA	NA	NA	NA	NA	NA	NA
CA27	1.57728e-259	-0.259581	0.233	0.445	2.46008e-255	CA27_dura_inner_skull_14	SETD3	NA	NA	NA	NA	NA	NA	NA
CA27	3.04119e-237	-0.270859	0.107	0.281	4.74334e-233	CA27_dura_inner_skull_14	SETDB1	NA	NA	NA	NA	NA	NA	NA
CA27	8.25426e-272	-0.250375	0.052	0.212	1.28742e-267	CA27_dura_inner_skull_14	SFXN4	NA	NA	NA	NA	NA	NA	NA
CA27	0	0.602775	0.227	0.043	0	CA27_dura_inner_skull_14	SGCD	NA	NA	NA	NA	NA	NA	NA
CA27	1.52469e-299	-0.33201	0.149	0.372	2.37805e-295	CA27_dura_inner_skull_14	SGCE	NA	NA	NA	NA	NA	NA	NA
CA27	3.81792e-238	-0.29212	0.142	0.335	5.95481e-234	CA27_dura_inner_skull_14	SGK3	NA	NA	NA	NA	NA	NA	NA
CA27	0	0.48481	0.972	0.821	0	CA27_dura_inner_skull_14	SGMS1	NA	NA	NA	NA	NA	NA	NA
CA27	0	-0.499183	0.344	0.634	0	CA27_dura_inner_skull_14	SGPP1	NA	NA	NA	NA	NA	NA	NA
CA27	0	-0.566508	0.273	0.625	0	CA27_dura_inner_skull_14	SH3D19	NA	NA	NA	NA	NA	NA	NA
CA27	3.43861e-140	0.336005	0.251	0.167	5.3632e-136	CA27_dura_inner_skull_14	SH3GL2	NA	NA	NA	NA	NA	NA	NA
CA27	0	-0.408728	0.108	0.341	0	CA27_dura_inner_skull_14	SH3PXD2A	NA	NA	NA	NA	NA	NA	NA
CA27	0	0.963241	0.999	0.975	0	CA27_dura_inner_skull_14	SH3RF1	NA	NA	NA	NA	NA	NA	NA
CA27	4.54949e-105	0.273589	0.617	0.531	7.09583e-101	CA27_dura_inner_skull_14	SHANK2	NA	NA	NA	NA	NA	NA	NA
CA27	0	-0.557824	0.114	0.377	0	CA27_dura_inner_skull_14	SHISA6	NA	NA	NA	NA	NA	NA	NA
CA27	0	-0.40437	0.239	0.504	0	CA27_dura_inner_skull_14	SHLD2	NA	NA	NA	NA	NA	NA	NA
CA27	0	-0.652211	0.088	0.4	0	CA27_dura_inner_skull_14	SIDT1	NA	NA	NA	NA	NA	NA	NA
CA27	0	-0.630008	0.634	0.853	0	CA27_dura_inner_skull_14	SIL1	NA	NA	NA	NA	NA	NA	NA
CA27	0	-0.654362	0.248	0.589	0	CA27_dura_inner_skull_14	SIM2	NA	NA	NA	NA	NA	NA	NA
CA27	1.34118e-240	-0.385631	0.342	0.567	2.09183e-236	CA27_dura_inner_skull_14	SIPA1L3	NA	NA	NA	NA	NA	NA	NA
CA27	5.12469e-290	-0.307548	0.104	0.305	7.99298e-286	CA27_dura_inner_skull_14	SKI	NA	NA	NA	NA	NA	NA	NA
CA27	1.24225e-187	-0.321342	0.128	0.292	1.93754e-183	CA27_dura_inner_skull_14	SLAIN1	NA	NA	NA	NA	NA	NA	NA
CA27	2.99139e-202	-0.263192	0.088	0.24	4.66567e-198	CA27_dura_inner_skull_14	SLBP	NA	NA	NA	NA	NA	NA	NA
CA27	1.89227142357197e-321	-0.40441	0.156	0.388	2.95137573934521e-317	CA27_dura_inner_skull_14	SLC11A2	NA	NA	NA	NA	NA	NA	NA
CA27	2.28546e-96	-0.346039	0.275	0.408	3.56463e-92	CA27_dura_inner_skull_14	SLC12A2	NA	NA	NA	NA	NA	NA	NA
CA27	0	-0.35669	0.132	0.363	0	CA27_dura_inner_skull_14	SLC12A8	NA	NA	NA	NA	NA	NA	NA
CA27	0	-0.433161	0.078	0.315	0	CA27_dura_inner_skull_14	SLC13A3	NA	NA	NA	NA	NA	NA	NA
CA27	0	-0.429725	0.099	0.355	0	CA27_dura_inner_skull_14	SLC16A1-AS1	NA	NA	NA	NA	NA	NA	NA
CA27	0	-0.864817	0.504	0.833	0	CA27_dura_inner_skull_14	SLC23A2	NA	NA	NA	NA	NA	NA	NA
CA27	0	-0.519863	0.375	0.672	0	CA27_dura_inner_skull_14	SLC25A16	NA	NA	NA	NA	NA	NA	NA
CA27	6.9259e-263	-0.370126	0.181	0.392	1.08023e-258	CA27_dura_inner_skull_14	SLC25A25	NA	NA	NA	NA	NA	NA	NA
CA27	1.45001e-243	-0.330328	0.223	0.437	2.26159e-239	CA27_dura_inner_skull_14	SLC25A40	NA	NA	NA	NA	NA	NA	NA
CA27	1.01144e-184	-0.259342	0.185	0.362	1.57754e-180	CA27_dura_inner_skull_14	SLC30A5	NA	NA	NA	NA	NA	NA	NA
CA27	0	0.707003	0.417	0.218	0	CA27_dura_inner_skull_14	SLC35F3	NA	NA	NA	NA	NA	NA	NA
CA27	0	-0.285666	0.014	0.188	0	CA27_dura_inner_skull_14	SLC36A4	NA	NA	NA	NA	NA	NA	NA
CA27	0	-1.28439	0.26	0.701	0	CA27_dura_inner_skull_14	SLC38A11	NA	NA	NA	NA	NA	NA	NA
CA27	2.6737e-139	-0.267669	0.222	0.378	4.17018e-135	CA27_dura_inner_skull_14	SLC41A2	NA	NA	NA	NA	NA	NA	NA
CA27	0	-0.318193	0.044	0.228	0	CA27_dura_inner_skull_14	SLC43A2	NA	NA	NA	NA	NA	NA	NA
CA27	6.55524e-155	-0.250804	0.202	0.365	1.02242e-150	CA27_dura_inner_skull_14	SLC44A4	NA	NA	NA	NA	NA	NA	NA
CA27	0	0.406378	0.207	0.043	0	CA27_dura_inner_skull_14	SLC44A5	NA	NA	NA	NA	NA	NA	NA
CA27	5.28493e-240	0.44837	0.619	0.467	8.2429e-236	CA27_dura_inner_skull_14	SLC45A3	NA	NA	NA	NA	NA	NA	NA
CA27	0	-1.75815	0.126	0.618	0	CA27_dura_inner_skull_14	SLC4A4	NA	NA	NA	NA	NA	NA	NA
CA27	8.92676e-224	-0.260132	0.201	0.394	1.39231e-219	CA27_dura_inner_skull_14	SLC7A1	NA	NA	NA	NA	NA	NA	NA
CA27	7.04566e-131	-0.269829	0.46	0.624	1.09891e-126	CA27_dura_inner_skull_14	SLC7A2	NA	NA	NA	NA	NA	NA	NA
CA27	2.1503e-233	-0.277747	0.141	0.331	3.35382e-229	CA27_dura_inner_skull_14	SLC9A8	NA	NA	NA	NA	NA	NA	NA
CA27	3.29614e-166	0.3555	0.517	0.43	5.14099e-162	CA27_dura_inner_skull_14	SLCO5A1	NA	NA	NA	NA	NA	NA	NA
CA27	5.96992e-78	0.25075	0.169	0.104	9.31129e-74	CA27_dura_inner_skull_14	SLIT2	NA	NA	NA	NA	NA	NA	NA
CA27	0	-0.292032	0.336	0.588	0	CA27_dura_inner_skull_14	SLMAP	NA	NA	NA	NA	NA	NA	NA
CA27	3.61121e-291	-0.362554	0.365	0.612	5.6324e-287	CA27_dura_inner_skull_14	SLX4IP	NA	NA	NA	NA	NA	NA	NA
CA27	1.7922e-227	-0.283542	0.129	0.312	2.79529e-223	CA27_dura_inner_skull_14	SMAD1	NA	NA	NA	NA	NA	NA	NA
CA27	1.96221e-194	0.276328	0.24	0.149	3.06047e-190	CA27_dura_inner_skull_14	SMARCA1	NA	NA	NA	NA	NA	NA	NA
CA27	0	1.00273	0.996	0.885	0	CA27_dura_inner_skull_14	SMCHD1	NA	NA	NA	NA	NA	NA	NA
CA27	3.59642e-260	-0.284229	0.22	0.435	5.60933e-256	CA27_dura_inner_skull_14	SMG6	NA	NA	NA	NA	NA	NA	NA
CA27	3.36812e-289	-0.274954	0.357	0.591	5.25326e-285	CA27_dura_inner_skull_14	SMG7	NA	NA	NA	NA	NA	NA	NA
CA27	0	-1.07384	0.072	0.37	0	CA27_dura_inner_skull_14	SMOC1	NA	NA	NA	NA	NA	NA	NA
CA27	3.32323e-184	0.336845	0.424	0.375	5.18324e-180	CA27_dura_inner_skull_14	SMOC2	NA	NA	NA	NA	NA	NA	NA
CA27	0	0.623159	1	0.983	0	CA27_dura_inner_skull_14	SND1	NA	NA	NA	NA	NA	NA	NA
CA27	2.95122e-132	-0.255302	0.199	0.348	4.60302e-128	CA27_dura_inner_skull_14	SNED1	NA	NA	NA	NA	NA	NA	NA
CA27	0	-0.288894	0.045	0.238	0	CA27_dura_inner_skull_14	SNHG25	NA	NA	NA	NA	NA	NA	NA
CA27	0	0.317883	0.947	0.753	0	CA27_dura_inner_skull_14	SNX13	NA	NA	NA	NA	NA	NA	NA
CA27	1.79244e-214	-0.252971	0.209	0.402	2.79567e-210	CA27_dura_inner_skull_14	SNX27	NA	NA	NA	NA	NA	NA	NA
CA27	4.53662e-237	-0.260901	0.228	0.433	7.07577e-233	CA27_dura_inner_skull_14	SNX29	NA	NA	NA	NA	NA	NA	NA
CA27	2.81504e-199	-0.260545	0.144	0.318	4.39061e-195	CA27_dura_inner_skull_14	SNX6	NA	NA	NA	NA	NA	NA	NA
CA27	0	-0.361201	0.089	0.311	0	CA27_dura_inner_skull_14	SNX8	NA	NA	NA	NA	NA	NA	NA
CA27	0	0.401572	0.819	0.592	0	CA27_dura_inner_skull_14	SNX9	NA	NA	NA	NA	NA	NA	NA
CA27	0	-0.420975	0.195	0.454	0	CA27_dura_inner_skull_14	SOAT1	NA	NA	NA	NA	NA	NA	NA
CA27	0	0.455815	0.31	0.187	0	CA27_dura_inner_skull_14	SOBP	NA	NA	NA	NA	NA	NA	NA
CA27	9.53401e-280	-0.683614	0.211	0.435	1.48702e-275	CA27_dura_inner_skull_14	SOCS2-AS1	NA	NA	NA	NA	NA	NA	NA
CA27	0	-0.593177	0.231	0.486	0	CA27_dura_inner_skull_14	SOD2	NA	NA	NA	NA	NA	NA	NA
CA27	1.30514e-185	-0.289971	0.346	0.54	2.03563e-181	CA27_dura_inner_skull_14	SORD	NA	NA	NA	NA	NA	NA	NA
CA27	7.95985e-113	0.262738	0.259	0.219	1.2415e-108	CA27_dura_inner_skull_14	SOX2-OT	NA	NA	NA	NA	NA	NA	NA
CA27	2.11433e-230	-0.261401	0.079	0.242	3.29773e-226	CA27_dura_inner_skull_14	SPATA6	NA	NA	NA	NA	NA	NA	NA
CA27	2.61367e-265	-0.263412	0.069	0.237	4.07654e-261	CA27_dura_inner_skull_14	SPDYE2	NA	NA	NA	NA	NA	NA	NA
CA27	4.23028e-215	-0.271179	0.246	0.446	6.59797e-211	CA27_dura_inner_skull_14	SPECC1L	NA	NA	NA	NA	NA	NA	NA
CA27	4.83794e-306	-0.406702	0.999	0.989	7.54573e-302	CA27_dura_inner_skull_14	SPIDR	NA	NA	NA	NA	NA	NA	NA
CA27	6.78149564825237e-318	-0.334919	0.031	0.19	1.05770987625792e-313	CA27_dura_inner_skull_14	SPINK1	NA	NA	NA	NA	NA	NA	NA
CA27	7.10657e-111	-0.314688	0.056	0.144	1.10841e-106	CA27_dura_inner_skull_14	SPOCK3	NA	NA	NA	NA	NA	NA	NA
CA27	5.05208e-199	-0.374005	0.243	0.422	7.87972e-195	CA27_dura_inner_skull_14	SPON2	NA	NA	NA	NA	NA	NA	NA
CA27	1.83513e-210	-0.267958	0.17	0.355	2.86226e-206	CA27_dura_inner_skull_14	SPRED2	NA	NA	NA	NA	NA	NA	NA
CA27	6.05252e-159	0.334924	0.33	0.218	9.44011e-155	CA27_dura_inner_skull_14	SPTLC3	NA	NA	NA	NA	NA	NA	NA
CA27	4.18349e-185	-0.309559	0.325	0.52	6.52498e-181	CA27_dura_inner_skull_14	SQSTM1	NA	NA	NA	NA	NA	NA	NA
CA27	1.59292e-231	-0.287568	0.077	0.234	2.48447e-227	CA27_dura_inner_skull_14	SRD5A1	NA	NA	NA	NA	NA	NA	NA
CA27	6.11895e-270	-0.343282	0.134	0.336	9.54373e-266	CA27_dura_inner_skull_14	SREBF2	NA	NA	NA	NA	NA	NA	NA
CA27	0	-0.367399	0.232	0.513	0	CA27_dura_inner_skull_14	SRPK1	NA	NA	NA	NA	NA	NA	NA
CA27	0	-0.299098	0.255	0.504	0	CA27_dura_inner_skull_14	SRSF4	NA	NA	NA	NA	NA	NA	NA
CA27	1.8490275543809e-312	-0.317559	0.078	0.271	2.88393e-308	CA27_dura_inner_skull_14	SS18L2	NA	NA	NA	NA	NA	NA	NA
CA27	2.15499e-221	-0.337019	0.274	0.484	3.36113e-217	CA27_dura_inner_skull_14	SSBP3	NA	NA	NA	NA	NA	NA	NA
CA27	8.79723e-243	-0.270939	0.097	0.274	1.3721e-238	CA27_dura_inner_skull_14	SSH1	NA	NA	NA	NA	NA	NA	NA
CA27	1.36485e-136	-0.274067	0.772	0.797	2.12876e-132	CA27_dura_inner_skull_14	SSH2	NA	NA	NA	NA	NA	NA	NA
CA27	0	-0.451355	0.018	0.193	0	CA27_dura_inner_skull_14	ST6GAL1	NA	NA	NA	NA	NA	NA	NA
CA27	0	-0.461122	0.126	0.352	0	CA27_dura_inner_skull_14	ST7	NA	NA	NA	NA	NA	NA	NA
CA27	0	-0.413654	0.211	0.483	0	CA27_dura_inner_skull_14	ST8SIA6-AS1	NA	NA	NA	NA	NA	NA	NA
CA27	0	-0.732649	0.489	0.761	0	CA27_dura_inner_skull_14	STARD13	NA	NA	NA	NA	NA	NA	NA
CA27	5.42481e-254	-0.308561	0.093	0.272	8.46108e-250	CA27_dura_inner_skull_14	STARD13-AS	NA	NA	NA	NA	NA	NA	NA
CA27	8.0388e-232	-0.277517	0.136	0.324	1.25381e-227	CA27_dura_inner_skull_14	STAT5B	NA	NA	NA	NA	NA	NA	NA
CA27	3.45808e-127	0.375628	0.804	0.696	5.39357e-123	CA27_dura_inner_skull_14	STEAP2-AS1	NA	NA	NA	NA	NA	NA	NA
CA27	2.25287e-221	-0.411124	0.092	0.255	3.5138e-217	CA27_dura_inner_skull_14	STEAP4	NA	NA	NA	NA	NA	NA	NA
CA27	0	-0.411628	0.222	0.496	0	CA27_dura_inner_skull_14	STK24	NA	NA	NA	NA	NA	NA	NA
CA27	5.79099e-217	0.29226	0.996	0.944	9.03221e-213	CA27_dura_inner_skull_14	STK39	NA	NA	NA	NA	NA	NA	NA
CA27	8.39815e-267	-0.296902	0.115	0.308	1.30986e-262	CA27_dura_inner_skull_14	STMP1	NA	NA	NA	NA	NA	NA	NA
CA27	4.95009e-176	0.271844	0.858	0.705	7.72065e-172	CA27_dura_inner_skull_14	STRBP	NA	NA	NA	NA	NA	NA	NA
CA27	0	-0.394495	0.124	0.355	0	CA27_dura_inner_skull_14	STX18-AS1	NA	NA	NA	NA	NA	NA	NA
CA27	1.54673e-253	-0.291479	0.108	0.292	2.41243e-249	CA27_dura_inner_skull_14	STX6	NA	NA	NA	NA	NA	NA	NA
CA27	0	-0.486609	0.056	0.266	0	CA27_dura_inner_skull_14	STXBP6	NA	NA	NA	NA	NA	NA	NA
CA27	0	-0.395914	0.159	0.4	0	CA27_dura_inner_skull_14	STYXL1	NA	NA	NA	NA	NA	NA	NA
CA27	5.0277e-266	-0.306878	0.2	0.42	7.84171e-262	CA27_dura_inner_skull_14	SUZ12	NA	NA	NA	NA	NA	NA	NA
CA27	0	-0.439544	0.186	0.443	0	CA27_dura_inner_skull_14	SYCP2	NA	NA	NA	NA	NA	NA	NA
CA27	0	-0.558931	0.373	0.668	0	CA27_dura_inner_skull_14	SYNE2	NA	NA	NA	NA	NA	NA	NA
CA27	1.98109e-213	-0.27003	0.229	0.425	3.08991e-209	CA27_dura_inner_skull_14	SYNJ2	NA	NA	NA	NA	NA	NA	NA
CA27	0	2.43617	0.99	0.637	0	CA27_dura_inner_skull_14	SYT1	NA	NA	NA	NA	NA	NA	NA
CA27	0	-0.675102	0.35	0.67	0	CA27_dura_inner_skull_14	SYTL2	NA	NA	NA	NA	NA	NA	NA
CA27	0	-0.460334	0.125	0.378	0	CA27_dura_inner_skull_14	TACC2	NA	NA	NA	NA	NA	NA	NA
CA27	3.68747e-202	-0.271362	0.808	0.817	5.75134e-198	CA27_dura_inner_skull_14	TAF15	NA	NA	NA	NA	NA	NA	NA
CA27	2.30434e-272	-0.31275	0.193	0.413	3.59408e-268	CA27_dura_inner_skull_14	TAF4	NA	NA	NA	NA	NA	NA	NA
CA27	4.1169e-196	-0.415853	0.484	0.666	6.42112e-192	CA27_dura_inner_skull_14	TAPT1-AS1	NA	NA	NA	NA	NA	NA	NA
CA27	7.30664e-236	-0.275999	0.122	0.307	1.13962e-231	CA27_dura_inner_skull_14	TATDN1	NA	NA	NA	NA	NA	NA	NA
CA27	1.22247799101485e-317	0.335127	0.883	0.673	1.90669892258586e-313	CA27_dura_inner_skull_14	TAX1BP1	NA	NA	NA	NA	NA	NA	NA
CA27	0	-0.541677	0.07	0.358	0	CA27_dura_inner_skull_14	TBC1D1	NA	NA	NA	NA	NA	NA	NA
CA27	8.48189e-237	-0.329392	0.38	0.599	1.32292e-232	CA27_dura_inner_skull_14	TBC1D14	NA	NA	NA	NA	NA	NA	NA
CA27	3.2671e-190	-0.261355	0.133	0.296	5.0957e-186	CA27_dura_inner_skull_14	TBC1D16	NA	NA	NA	NA	NA	NA	NA
CA27	0	-0.340279	0.239	0.495	0	CA27_dura_inner_skull_14	TBC1D19	NA	NA	NA	NA	NA	NA	NA
CA27	3.55858e-269	-0.258018	0.277	0.494	5.55032e-265	CA27_dura_inner_skull_14	TBC1D22A	NA	NA	NA	NA	NA	NA	NA
CA27	0	0.538778	0.564	0.408	0	CA27_dura_inner_skull_14	TBC1D32	NA	NA	NA	NA	NA	NA	NA
CA27	0	-0.642505	0.119	0.398	0	CA27_dura_inner_skull_14	TBC1D4	NA	NA	NA	NA	NA	NA	NA
CA27	7.38017e-275	-0.479336	0.968	0.948	1.15109e-270	CA27_dura_inner_skull_14	TBC1D8	NA	NA	NA	NA	NA	NA	NA
CA27	0	-0.368725	0.145	0.379	0	CA27_dura_inner_skull_14	TBCD	NA	NA	NA	NA	NA	NA	NA
CA27	0	-0.409822	0.258	0.528	0	CA27_dura_inner_skull_14	TBX3	NA	NA	NA	NA	NA	NA	NA
CA27	0	-0.746466	0.97	0.976	0	CA27_dura_inner_skull_14	TC2N	NA	NA	NA	NA	NA	NA	NA
CA27	2.23105e-203	-0.256754	0.196	0.383	3.47977e-199	CA27_dura_inner_skull_14	TCAF1	NA	NA	NA	NA	NA	NA	NA
CA27	0	0.297237	0.952	0.746	0	CA27_dura_inner_skull_14	TCF12	NA	NA	NA	NA	NA	NA	NA
CA27	1.36918e-228	-0.277493	0.21	0.411	2.13551e-224	CA27_dura_inner_skull_14	TCF20	NA	NA	NA	NA	NA	NA	NA
CA27	0	-0.571648	0.138	0.396	0	CA27_dura_inner_skull_14	TCF7L2	NA	NA	NA	NA	NA	NA	NA
CA27	4.71932e-271	-0.265083	0.062	0.228	7.36072e-267	CA27_dura_inner_skull_14	TCTEX1D2	NA	NA	NA	NA	NA	NA	NA
CA27	0	-0.371565	0.202	0.457	0	CA27_dura_inner_skull_14	TDRD3	NA	NA	NA	NA	NA	NA	NA
CA27	2.36374e-169	-0.251381	0.156	0.317	3.68672e-165	CA27_dura_inner_skull_14	TDRP	NA	NA	NA	NA	NA	NA	NA
CA27	0	0.405284	0.988	0.839	0	CA27_dura_inner_skull_14	TEAD1	NA	NA	NA	NA	NA	NA	NA
CA27	4.25775e-261	-0.303049	0.125	0.32	6.64082e-257	CA27_dura_inner_skull_14	TECPR2	NA	NA	NA	NA	NA	NA	NA
CA27	5.53265e-101	0.363021	0.727	0.652	8.62927e-97	CA27_dura_inner_skull_14	TENM1	NA	NA	NA	NA	NA	NA	NA
CA27	0	2.30738	0.993	0.601	0	CA27_dura_inner_skull_14	TENM2	NA	NA	NA	NA	NA	NA	NA
CA27	4.91083e-203	0.264112	0.136	0.033	7.65943e-199	CA27_dura_inner_skull_14	TENM4	NA	NA	NA	NA	NA	NA	NA
CA27	0	0.438784	0.786	0.534	0	CA27_dura_inner_skull_14	TET2	NA	NA	NA	NA	NA	NA	NA
CA27	0	-0.307322	0.066	0.261	0	CA27_dura_inner_skull_14	TEX22	NA	NA	NA	NA	NA	NA	NA
CA27	0	-0.468655	0.037	0.281	0	CA27_dura_inner_skull_14	TFEB	NA	NA	NA	NA	NA	NA	NA
CA27	0	-3.57159	0.019	0.597	0	CA27_dura_inner_skull_14	TGM4	NA	NA	NA	NA	NA	NA	NA
CA27	0	-0.385245	0.114	0.352	0	CA27_dura_inner_skull_14	THEM4	NA	NA	NA	NA	NA	NA	NA
CA27	7.09276e-213	0.451142	0.632	0.511	1.10626e-208	CA27_dura_inner_skull_14	THRB	NA	NA	NA	NA	NA	NA	NA
CA27	0	-0.549243	0.159	0.409	0	CA27_dura_inner_skull_14	THSD4	NA	NA	NA	NA	NA	NA	NA
CA27	1.42764e-206	-0.267378	0.17	0.353	2.22669e-202	CA27_dura_inner_skull_14	THUMPD2	NA	NA	NA	NA	NA	NA	NA
CA27	0	0.431477	0.884	0.626	0	CA27_dura_inner_skull_14	TM9SF3	NA	NA	NA	NA	NA	NA	NA
CA27	3.79087e-278	-0.323752	0.147	0.355	5.91262e-274	CA27_dura_inner_skull_14	TM9SF4	NA	NA	NA	NA	NA	NA	NA
CA27	3.11439e-218	-0.309404	0.854	0.776	4.85751e-214	CA27_dura_inner_skull_14	TMC5	NA	NA	NA	NA	NA	NA	NA
CA27	4.22314e-291	-0.343758	0.149	0.366	6.58683e-287	CA27_dura_inner_skull_14	TMCO4	NA	NA	NA	NA	NA	NA	NA
[truncated: 14,563 more rows]

## Sheet: S4
Supplementary Table S4: Significant DEGs between different tumour collection lessions.
Differential expression analysis using FindAllMarkers() of Seurat (v4.3) was conducted between different lessions using integrated tumour-only cells. Only significant DEGs are shown. Log2FC cutoff was 0.25 and adjusted p value cutoff was 0.05.
p_val	avg_log2FC	pct.1	pct.2	p_val_adj	cluster	gene
0	3.09612	0.705	0.092	0	dura	TENM2
0	2.92221	0.988	0.466	0	dura	GPC6
0	2.53803	0.856	0.094	0	dura	AC010983.1
0	2.23242	0.885	0.142	0	dura	GLYATL2
0	2.1469	0.985	0.389	0	dura	EPHA6
0	2.13259	0.859	0.392	0	dura	SYT1
0	2.05279	0.999	0.838	0	dura	PPP3CA
0	2.00839	0.975	0.531	0	dura	SH3RF1
0	1.95997	0.994	0.629	0	dura	UNC13B
0	1.94973	0.913	0.36	0	dura	EDA
0	1.82389	0.977	0.611	0	dura	NCOR1
0	1.75049	0.977	0.424	0	dura	ARHGAP6
0	1.71455	0.836	0.338	0	dura	CPE
0	1.70925	0.685	0.117	0	dura	GRIN3A
0	1.66103	0.994	0.668	0	dura	PLPP1
0	1.64094	0.855	0.256	0	dura	MCCC2
0	1.57858	0.828	0.226	0	dura	AC092691.1
0	1.49023	0.992	0.82	0	dura	RALGAPA2
0	1.48249	0.671	0.182	0	dura	RTN1
0	1.46794	0.617	0.109	0	dura	ANOS1
0	1.4674	0.681	0.152	0	dura	KCNN2
0	1.46406	0.71	0.162	0	dura	SESN3
0	1.44511	0.844	0.304	0	dura	COLEC12
0	1.43797	0.604	0.187	0	dura	AKAP12
0	1.41977	0.936	0.313	0	dura	AP001636.3
0	1.40597	0.848	0.35	0	dura	DACH1
0	1.40289	0.79	0.272	0	dura	BASP1
0	1.35208	0.863	0.327	0	dura	SEMA3C
0	1.34632	0.883	0.395	0	dura	PRKCA
0	1.34398	0.681	0.144	0	dura	C2orf27A
0	1.34173	0.966	0.673	0	dura	GRHL2
0	1.33219	0.848	0.335	0	dura	PMEPA1
0	1.32636	0.807	0.415	0	dura	TTLL5
0	1.32335	0.551	0.048	0	dura	GPM6A
0	1.32056	0.997	0.883	0	dura	IMMP2L
0	1.31795	0.679	0.309	0	dura	GPC5
0	1.30202	0.669	0.177	0	dura	LINC01619
0	1.29036	0.917	0.37	0	dura	MIR99AHG
0	1.27429	0.634	0.105	0	dura	PDE10A
0	1.27237	0.947	0.632	0	dura	STK39
0	1.272	0.944	0.504	0	dura	ZBTB16
0	1.26455	0.736	0.243	0	dura	TNFAIP8
0	1.24709	0.975	0.515	0	dura	BMPR1B
0	1.23932	0.932	0.535	0	dura	IGF1R
0	1.23444	0.712	0.293	0	dura	INPP4B
0	1.21389	0.865	0.36	0	dura	RMST
0	1.20433	0.619	0.211	0	dura	TENM1
0	1.19222	0.951	0.527	0	dura	GALNT7
0	1.16847	0.347	0.033	0	dura	EBF1
0	1.14492	0.793	0.325	0	dura	PHTF2
0	1.12819	0.433	0.075	0	dura	RELN
0	1.1262	0.851	0.43	0	dura	MPP6
0	1.1195	0.672	0.161	0	dura	PLEKHB2
0	1.10141	0.765	0.245	0	dura	DLGAP1
0	1.08787	0.298	0.041	0	dura	PCAT4
0	1.08242	0.48	0.121	0	dura	LRRTM4
0	1.07946	0.352	0.121	0	dura	PCA3
0	1.07158	0.958	0.554	0	dura	PRR16
0	1.06914	0.612	0.128	0	dura	HPGD
0	1.06283	0.947	0.511	0	dura	PDLIM5
0	1.04945	0.592	0.181	0	dura	CDC14B
0	1.04818	0.819	0.426	0	dura	TC2N
0	1.03815	0.826	0.357	0	dura	STEAP2
0	1.02784	0.681	0.231	0	dura	ANTXR2
0	1.00995	0.939	0.632	0	dura	ATP8A1
0	0.979716	0.546	0.121	0	dura	AL356737.2
0	0.978206	0.554	0.157	0	dura	STEAP2-AS1
0	0.973781	0.929	0.666	0	dura	TBC1D8
0	0.962607	0.453	0.114	0	dura	XACT
0	0.962493	0.941	0.593	0	dura	ASTN2
0	0.962225	0.477	0.057	0	dura	LRRC9
0	0.928821	0.848	0.543	0	dura	ZSWIM6
0	0.928801	0.829	0.35	0	dura	TMEFF2
0	0.92762	0.923	0.645	0	dura	SMCHD1
0	0.922031	0.855	0.405	0	dura	WWC1
0	0.918202	0.957	0.715	0	dura	NFIB
0	0.915065	0.983	0.519	0	dura	CPNE4
0	0.914332	0.64	0.189	0	dura	TRGC1
0	0.913276	0.958	0.561	0	dura	CTNND2
0	0.902531	0.752	0.344	0	dura	DUSP16
0	0.894077	0.724	0.411	0	dura	PRIM2
0	0.886963	0.362	0.065	0	dura	ADAMTSL1
0	0.876267	0.955	0.656	0	dura	MACROD2
0	0.871903	0.895	0.489	0	dura	CD2AP
0	0.854908	0.646	0.207	0	dura	ARLNC1
0	0.85058	0.413	0.134	0	dura	LRRIQ1
0	0.850066	0.948	0.59	0	dura	DMXL1
0	0.849532	0.982	0.787	0	dura	SND1
0	0.845211	0.371	0.065	0	dura	FAM155A
0	0.843979	0.868	0.47	0	dura	FAM110B
0	0.843164	0.42	0.061	0	dura	AC008415.1
0	0.841551	0.902	0.549	0	dura	RANBP17
0	0.839362	0.918	0.55	0	dura	BAIAP2L1
0	0.836582	0.944	0.454	0	dura	AF117829.1
0	0.835479	0.549	0.145	0	dura	RARB
0	0.831175	0.987	0.764	0	dura	CUX1
0	0.821145	0.496	0.141	0	dura	AC108690.1
0	0.818077	0.786	0.39	0	dura	RHPN2
0	0.815436	0.874	0.486	0	dura	COMMD10
0	0.814917	0.876	0.561	0	dura	C1orf21
0	0.813456	0.495	0.092	0	dura	POTEJ
0	0.799065	0.331	0.086	0	dura	NRG3
0	0.79279	0.579	0.284	0	dura	ZDHHC14
0	0.791986	0.676	0.34	0	dura	TMC5
0	0.787374	0.768	0.387	0	dura	HSD17B4
0	0.78392	0.652	0.294	0	dura	IRS2
0	0.780815	0.864	0.451	0	dura	TASP1
0	0.780781	0.598	0.486	0	dura	SERGEF
0	0.776049	0.748	0.447	0	dura	PCLO
0	0.772184	0.463	0.211	0	dura	RNF144B
0	0.771153	0.463	0.122	0	dura	PTPN21
0	0.767478	0.642	0.322	0	dura	ABCC4
0	0.75381	0.408	0.14	0	dura	GRIK2
0	0.753574	0.504	0.198	0	dura	NIPAL3
0	0.750709	0.51	0.189	0	dura	IL1RAPL1
0	0.745491	0.559	0.241	0	dura	ASRGL1
0	0.740409	0.598	0.21	0	dura	GRAMD2B
0	0.736723	0.73	0.315	0	dura	GUCY1A1
0	0.734139	0.518	0.185	0	dura	AMOTL1
0	0.726717	0.552	0.169	0	dura	AL110292.1
0	0.72575	0.437	0.07	0	dura	LINC01194
0	0.720322	0.948	0.572	0	dura	SERINC5
0	0.718479	0.926	0.676	0	dura	CAMK2D
0	0.7162	0.579	0.228	0	dura	SAMD4A
0	0.714585	0.326	0.2	0	dura	MMP26
0	0.712926	0.604	0.257	0	dura	CEMIP2
0	0.711604	0.66	0.378	0	dura	ARHGAP26
0	0.708231	0.918	0.597	0	dura	CDK14
0	0.706629	0.591	0.227	0	dura	LINC01725
0	0.698196	0.479	0.163	0	dura	SLC45A3
0	0.697548	0.525	0.281	0	dura	TSPAN5
0	0.68874	0.691	0.358	0	dura	HIVEP2
0	0.684336	0.639	0.305	0	dura	PARP8
0	0.669677	0.816	0.395	0	dura	NAMPT
0	0.6675	0.677	0.363	0	dura	TXNDC16
0	0.667461	0.814	0.579	0	dura	CERS6
0	0.666935	0.575	0.238	0	dura	TRIM36
0	0.662983	0.419	0.128	0	dura	NOTCH2NLC
0	0.661073	0.379	0.101	0	dura	OCRL
0	0.659588	0.63	0.301	0	dura	DIAPH1
0	0.657526	0.637	0.332	0	dura	NDUFAF2
0	0.646308	0.627	0.333	0	dura	RAP1GDS1
0	0.644698	0.79	0.562	0	dura	ASCC3
0	0.631963	0.865	0.663	0	dura	PDS5B
0	0.630372	0.555	0.264	0	dura	MTHFD1L
0	0.629134	0.685	0.451	0	dura	BACE2
0	0.6274	0.628	0.291	0	dura	QKI
0	0.626137	0.682	0.412	0	dura	OSBPL8
0	0.625914	0.945	0.683	0	dura	UBE2E2
0	0.625133	0.492	0.158	0	dura	ARHGAP24
0	0.620075	0.498	0.246	0	dura	CSGALNACT1
0	0.618983	0.639	0.304	0	dura	GPCPD1
0	0.616467	0.399	0.145	0	dura	EPHA5
0	0.61504	0.502	0.225	0	dura	MAPK4
0	0.611256	0.228	0.054	0	dura	TGM4
0	0.610215	0.496	0.16	0	dura	AC130456.2
0	0.6082	0.38	0.125	0	dura	DOCK8
0	0.605755	0.54	0.32	0	dura	SLC23A2
0	0.6043	0.993	0.915	0	dura	GPHN
0	0.603081	0.504	0.148	0	dura	GLYATL1
0	0.600167	0.415	0.08	0	dura	RNASEH2B
0	0.599799	0.777	0.442	0	dura	AFF4
0	0.594105	0.501	0.222	0	dura	MAP1B
0	0.590099	0.847	0.522	0	dura	PARD3B
0	0.589663	0.481	0.219	0	dura	ORC5
0	0.587248	0.278	0.016	0	dura	AC064875.1
0	0.586321	0.515	0.204	0	dura	IRS1
0	0.585964	0.636	0.332	0	dura	CCNH
0	0.585341	0.379	0.081	0	dura	LINC01146
0	0.584884	0.504	0.274	0	dura	NFKB1
0	0.583289	0.571	0.199	0	dura	AC097515.1
0	0.574434	0.85	0.557	0	dura	FBXW11
0	0.573378	0.6	0.369	0	dura	LRRFIP2
0	0.568734	0.374	0.054	0	dura	LINC01297
0	0.568045	0.811	0.5	0	dura	RALGPS2
0	0.564093	0.865	0.555	0	dura	UTRN
0	0.561217	0.808	0.782	0	dura	GMDS
0	0.559842	0.513	0.215	0	dura	IFT57
0	0.55535	0.983	0.856	0	dura	FGF13
0	0.554902	0.64	0.36	0	dura	EVL
0	0.552158	0.909	0.598	0	dura	RASAL2
0	0.54665	0.494	0.144	0	dura	AC068633.1
0	0.544168	0.266	0.025	0	dura	COL25A1
0	0.543636	0.788	0.483	0	dura	NEK7
0	0.543574	0.983	0.85	0	dura	SPIDR
0	0.541581	0.397	0.165	0	dura	JPH1
0	0.538224	0.395	0.16	0	dura	CROT
0	0.538082	0.583	0.287	0	dura	RYBP
0	0.535967	0.353	0.026	0	dura	LINC01087
0	0.531126	0.764	0.464	0	dura	KAT6A
0	0.528584	0.599	0.32	0	dura	RASEF
0	0.528572	0.429	0.193	0	dura	DPYSL3
0	0.52725	0.85	0.574	0	dura	TEAD1
0	0.52698	0.487	0.261	0	dura	RASSF3
0	0.525539	0.854	0.588	0	dura	PPP2R5E
0	0.523979	0.478	0.2	0	dura	SLC7A2
0	0.522492	0.396	0.145	0	dura	RNF150
0	0.522351	0.595	0.338	0	dura	SIK2
0	0.521821	0.251	0.114	0	dura	PDK4
0	0.520674	0.813	0.564	0	dura	SSBP2
0	0.520643	0.572	0.323	0	dura	TTC19
0	0.519901	0.987	0.828	0	dura	PDE4D
0	0.515806	0.677	0.412	0	dura	SNHG14
0	0.512986	0.448	0.165	0	dura	SLC2A12
0	0.510809	0.992	0.937	0	dura	KMT2C
0	0.509739	0.468	0.297	0	dura	CATSPERB
0	0.509633	0.735	0.327	0	dura	PTPRM
0	0.508618	0.6	0.315	0	dura	PTPRG
0	0.508168	0.737	0.453	0	dura	CAMSAP2
0	0.506575	0.933	0.69	0	dura	R3HDM2
0	0.504815	0.497	0.224	0	dura	SLCO5A1
0	0.503229	0.914	0.676	0	dura	GOLPH3
0	0.502713	0.604	0.452	0	dura	PPM1B
0	0.50218	0.266	0.051	0	dura	NAV3
0	0.490607	0.972	0.865	0	dura	NCOA2
0	0.490183	0.489	0.258	0	dura	CDYL2
0	0.489497	0.788	0.537	0	dura	ARIH1
0	0.484415	0.375	0.124	0	dura	AC092422.1
0	0.481345	0.975	0.728	0	dura	ALCAM
0	0.480455	0.911	0.545	0	dura	ELL2
0	0.475599	0.502	0.331	0	dura	CENPP
0	0.472751	0.994	0.909	0	dura	FOXP1
0	0.465927	0.761	0.529	0	dura	ARHGEF12
0	0.459152	0.437	0.137	0	dura	PCAT14
0	0.457098	0.798	0.529	0	dura	SHROOM3
0	0.455932	0.793	0.573	0	dura	FBXW7
0	0.453072	0.634	0.398	0	dura	SCFD2
0	0.452735	0.676	0.467	0	dura	PPP1R13B
0	0.452266	0.458	0.207	0	dura	UACA
0	0.451993	0.404	0.221	0	dura	ERO1A
0	0.451074	0.469	0.258	0	dura	NEK1
0	0.448838	0.628	0.43	0	dura	RNF24
0	0.44808	0.229	0.039	0	dura	AL135878.1
0	0.444235	0.87	0.64	0	dura	ANKHD1
0	0.440204	0.323	0.073	0	dura	UGT2B15
0	0.43991	0.61	0.388	0	dura	ATF6
0	0.439217	0.362	0.119	0	dura	ETS2
0	0.436938	0.551	0.308	0	dura	TMEM117
0	0.434093	0.671	0.514	0	dura	DOCK4
0	0.433222	0.292	0.056	0	dura	AC109466.1
0	0.432182	0.363	0.114	0	dura	AC090796.1
0	0.431782	0.647	0.457	0	dura	ANKH
0	0.431252	0.43	0.206	0	dura	LYN
0	0.427813	0.916	0.618	0	dura	RBM47
0	0.427009	0.249	0.03	0	dura	CDH6
0	0.425859	0.851	0.648	0	dura	TMTC2
0	0.424843	0.234	0.019	0	dura	BNC2
0	0.422513	0.662	0.46	0	dura	RPS6KA5
0	0.421266	0.799	0.544	0	dura	LMBR1
0	0.421131	0.804	0.659	0	dura	P4HA1
0	0.418748	0.547	0.321	0	dura	MSH3
0	0.417695	0.387	0.161	0	dura	MINDY4
0	0.417633	0.273	0.046	0	dura	AC090709.1
0	0.416362	0.483	0.306	0	dura	TBC1D14
0	0.414646	0.991	0.94	0	dura	LRBA
0	0.413148	0.527	0.305	0	dura	SLC30A9
0	0.412855	0.252	0.085	0	dura	C5
0	0.412555	0.48	0.233	0	dura	YTHDC2
0	0.412176	0.938	0.802	0	dura	HNRNPC
0	0.411211	0.459	0.189	0	dura	ZFHX4
0	0.41044	0.35	0.132	0	dura	EPAS1
0	0.410177	0.511	0.32	0	dura	GPR137C
0	0.408383	0.545	0.351	0	dura	FANCC
0	0.407654	0.62	0.384	0	dura	PPP2R2A
0	0.406852	0.574	0.389	0	dura	RAP1B
0	0.404109	0.351	0.167	0	dura	MAGI2
0	0.402394	0.501	0.262	0	dura	SUCLG2
0	0.40171	0.393	0.156	0	dura	NEDD9
0	0.400374	0.288	0.077	0	dura	ADAMTS3
0	0.400118	0.878	0.667	0	dura	DCAF6
0	0.398349	0.605	0.416	0	dura	SCAPER
0	0.39583	0.607	0.358	0	dura	MAPK10
0	0.393676	0.518	0.294	0	dura	HOMER2
0	0.392098	0.854	0.666	0	dura	PHF14
0	0.390421	0.632	0.462	0	dura	AKAP13
0	0.390173	0.371	0.16	0	dura	ST8SIA6
0	0.389249	0.353	0.15	0	dura	CDH26
0	0.388271	0.487	0.294	0	dura	ARFGAP3
0	0.386418	0.884	0.614	0	dura	CTNND1
0	0.386167	0.609	0.418	0	dura	STAT3
0	0.385568	0.579	0.379	0	dura	TOP1
0	0.385554	0.597	0.407	0	dura	FNBP1
0	0.385207	0.706	0.496	0	dura	EGFR
0	0.384031	0.298	0.124	0	dura	BORCS5
0	0.383495	0.365	0.155	0	dura	PKIA
0	0.383258	0.98	0.888	0	dura	MED13L
0	0.383204	0.347	0.185	0	dura	AL645568.1
0	0.382356	0.708	0.52	0	dura	PRKDC
0	0.381802	0.576	0.39	0	dura	AAK1
0	0.380988	0.936	0.776	0	dura	BRAF
0	0.379838	0.367	0.157	0	dura	LNX1
0	0.37886	0.587	0.389	0	dura	NT5C2
0	0.378509	0.902	0.738	0	dura	CADPS2
0	0.378435	0.43	0.23	0	dura	CMC1
0	0.377318	0.197	0.076	0	dura	TMEM132B
0	0.377011	0.614	0.386	0	dura	APBB2
0	0.374285	0.699	0.49	0	dura	METTL15
0	0.373954	0.416	0.184	0	dura	DPY19L2
0	0.372888	0.62	0.293	0	dura	GALNT17
0	0.372113	0.37	0.155	0	dura	AC107419.1
0	0.371306	0.389	0.222	0	dura	SLC12A2
0	0.370646	0.311	0.135	0	dura	EML5
0	0.370307	0.805	0.607	0	dura	CHCHD3
0	0.369874	0.334	0.151	0	dura	MAML2
0	0.367852	0.441	0.243	0	dura	CRIM1
0	0.366638	0.455	0.272	0	dura	PDE8A
0	0.364515	0.556	0.372	0	dura	CDC42SE2
0	0.363772	0.248	0.035	0	dura	AC093791.2
0	0.362304	0.476	0.267	0	dura	SYTL2
0	0.361882	0.511	0.311	0	dura	CERT1
0	0.360988	0.244	0.066	0	dura	ANGPTL4
0	0.360238	0.318	0.106	0	dura	EBF4
0	0.358349	0.537	0.351	0	dura	ATG10
0	0.357534	0.838	0.634	0	dura	PPP1R12B
0	0.356687	0.248	0.056	0	dura	SPTLC3
0	0.354579	0.502	0.313	0	dura	SMURF1
0	0.354038	0.421	0.254	0	dura	DDX10
0	0.353479	0.595	0.388	0	dura	LCORL
0	0.352407	0.405	0.214	0	dura	IFRD1
0	0.350682	0.63	0.446	0	dura	GPBP1
0	0.349848	0.377	0.194	0	dura	SORD
0	0.349425	0.316	0.095	0	dura	GPC5-AS1
0	0.349095	0.837	0.703	0	dura	ELF2
0	0.348188	0.189	0.024	0	dura	LINC02147
0	0.345139	0.331	0.135	0	dura	GMPR
0	0.343144	0.87	0.396	0	dura	FOLH1
0	0.342176	0.494	0.304	0	dura	TET2
0	0.342154	0.312	0.125	0	dura	GRM8
0	0.3413	0.522	0.342	0	dura	SNX9
0	0.340769	0.227	0.029	0	dura	LINC01821
0	0.339669	0.367	0.187	0	dura	PTK2B
0	0.339631	0.462	0.265	0	dura	PDE9A
0	0.339394	0.453	0.251	0	dura	RPRD1B
0	0.338144	0.677	0.464	0	dura	URI1
0	0.33639	0.757	0.526	0	dura	FKBP5
0	0.335544	0.754	0.563	0	dura	ECPAS
0	0.334035	0.592	0.441	0	dura	NAP1L1
0	0.333023	0.398	0.215	0	dura	ATG2B
0	0.331793	0.345	0.169	0	dura	TBPL1
0	0.331616	0.18	0.043	0	dura	AC114689.3
0	0.331347	0.657	0.491	0	dura	PTPRA
0	0.330348	0.538	0.364	0	dura	TM9SF3
0	0.32934	0.312	0.156	0	dura	CRY1
0	0.328318	0.326	0.142	0	dura	EGLN3
0	0.325537	0.228	0.067	0	dura	ARG2
0	0.325298	0.267	0.082	0	dura	AP000787.1
0	0.323523	0.237	0.062	0	dura	AC012574.1
0	0.322167	0.875	0.744	0	dura	GNAQ
0	0.31974	0.456	0.263	0	dura	MYRIP
0	0.319738	0.311	0.11	0	dura	IL1R1
0	0.317354	0.239	0.119	0	dura	LRRN1
0	0.317026	0.597	0.42	0	dura	XRN2
0	0.316911	0.799	0.6	0	dura	SIK3
0	0.316434	0.355	0.145	0	dura	TBX3
0	0.315992	0.466	0.269	0	dura	KIF16B
0	0.315983	0.509	0.346	0	dura	ZNF91
0	0.315159	0.556	0.394	0	dura	BAZ1A
0	0.313967	0.266	0.102	0	dura	ANKRD50
0	0.313551	0.599	0.447	0	dura	COA1
0	0.312482	0.354	0.163	0	dura	CBWD1
0	0.309954	0.739	0.58	0	dura	FAM160A1
0	0.309561	0.314	0.163	0	dura	ADD3
0	0.309406	0.824	0.647	0	dura	MON2
0	0.308505	0.471	0.298	0	dura	WAPL
0	0.307981	0.449	0.28	0	dura	CYTH3
0	0.307961	0.561	0.384	0	dura	MEF2A
0	0.307281	0.709	0.513	0	dura	RBM33
0	0.305809	0.388	0.185	0	dura	CNTLN
0	0.305491	0.97	0.811	0	dura	TTC6
0	0.304849	0.362	0.171	0	dura	SPATA6L
0	0.304547	0.784	0.613	0	dura	PAN3
0	0.30406	0.424	0.234	0	dura	SCAMP1
0	0.302855	0.24	0.104	0	dura	DSCAM-AS1
0	0.302634	0.987	0.907	0	dura	FAF1
0	0.302632	0.498	0.296	0	dura	ADARB1
0	0.302276	0.762	0.553	0	dura	LUC7L2
0	0.302029	0.645	0.472	0	dura	UBAP2
0	0.300941	0.328	0.147	0	dura	LINC02343
0	0.299124	0.855	0.653	0	dura	GOLGA4
0	0.297719	0.264	0.131	0	dura	ADGRL2
0	0.297159	0.289	0.108	0	dura	KRT19
0	0.296735	0.205	0.034	0	dura	ABCA13
0	0.296409	0.316	0.162	0	dura	SLC1A1
0	0.296139	0.323	0.166	0	dura	CFAP69
0	0.292881	0.398	0.268	0	dura	PCNX4
0	0.291014	0.31	0.142	0	dura	KLHL2
0	0.290872	0.29	0.109	0	dura	STARD3NL
0	0.290658	0.418	0.255	0	dura	CKMT2-AS1
0	0.290202	0.331	0.158	0	dura	EDRF1
0	0.290192	0.385	0.223	0	dura	MRPS27
0	0.289507	0.212	0.065	0	dura	SERHL2
0	0.288752	0.496	0.312	0	dura	ZFAND6
0	0.288633	0.261	0.11	0	dura	AC112493.1
0	0.288082	0.35	0.18	0	dura	ZHX3
0	0.287829	0.375	0.212	0	dura	AP001011.1
0	0.286823	0.889	0.76	0	dura	KMT2E
0	0.286449	0.463	0.253	0	dura	FBXL7
0	0.286271	0.25	0.086	0	dura	GRID1
0	0.286253	0.855	0.708	0	dura	COG5
0	0.286035	0.336	0.17	0	dura	HDGFL3
0	0.28532	0.208	0.023	0	dura	LINC01790
0	0.284809	0.237	0.076	0	dura	RCAN3
0	0.284598	0.356	0.179	0	dura	RIPK2
0	0.283359	0.455	0.278	0	dura	BMT2
0	0.279194	0.564	0.258	0	dura	AC104041.1
0	0.276965	0.909	0.701	0	dura	ACACA
0	0.276379	0.152	0.022	0	dura	LMNTD1
0	0.275958	0.164	0.023	0	dura	MIR100HG
0	0.274958	0.957	0.82	0	dura	ZBTB20
0	0.274928	0.434	0.286	0	dura	RALY
0	0.274531	0.263	0.125	0	dura	SOCS2-AS1
0	0.273628	0.474	0.317	0	dura	SEPTIN7
0	0.272188	0.573	0.39	0	dura	PTEN
0	0.271955	0.923	0.835	0	dura	MKLN1
0	0.269397	0.868	0.775	0	dura	DYRK1A
0	0.267879	0.182	0.031	0	dura	LINC02516
0	0.266991	0.42	0.25	0	dura	LEMD3
0	0.266453	0.224	0.075	0	dura	DNAJC12
0	0.266249	0.248	0.091	0	dura	LINC01687
0	0.262363	0.242	0.06	0	dura	SPON2
0	0.26162	0.659	0.453	0	dura	CD46
0	0.260841	0.713	0.519	0	dura	USP54
0	0.258601	0.226	0.073	0	dura	AC096741.1
0	0.2581	0.371	0.186	0	dura	AP3S1
0	0.25792	0.3	0.153	0	dura	PTPDC1
0	0.257727	0.155	0.012	0	dura	AC008574.1
0	0.254594	0.513	0.292	0	dura	KALRN
0	0.254491	0.484	0.312	0	dura	CWC27
0	0.251958	0.215	0.058	0	dura	AC111006.1
0	0.251686	0.189	0.051	0	dura	AL157911.1
0	-0.250022	0.081	0.21	0	dura	LINC01237
0	-0.25029	0.119	0.274	0	dura	GDI2
0	-0.250451	0.69	0.434	0	dura	CNTNAP2
0	-0.251709	0.111	0.244	0	dura	HLTF
0	-0.25182	0.041	0.156	0	dura	ABCA1
0	-0.252835	0.051	0.165	0	dura	SRGAP3
0	-0.254033	0.007	0.101	0	dura	SEZ6L
0	-0.254509	0.044	0.179	0	dura	AL139260.1
0	-0.255348	0.067	0.193	0	dura	HSPE1
0	-0.255447	0.007	0.155	0	dura	HSD17B11
0	-0.255544	0.004	0.135	0	dura	TAFA5
0	-0.258153	0	0.108	0	dura	LINC02335
0	-0.258389	0.129	0.271	0	dura	ORC2
0	-0.260308	0.009	0.114	0	dura	ADGRG6
0	-0.262059	0.02	0.151	0	dura	HMGN3
0	-0.262729	0.011	0.101	0	dura	TMTC1
0	-0.263418	0.077	0.213	0	dura	B3GALNT2
0	-0.265698	0.029	0.162	0	dura	AC105402.3
0	-0.266139	0.096	0.246	0	dura	ZBTB8OS
0	-0.266881	0.013	0.137	0	dura	KCNS3
0	-0.267356	0.025	0.149	0	dura	SNAP25
0	-0.268098	0.012	0.132	0	dura	LINC02466
0	-0.268654	0.008	0.1	0	dura	ELAVL4
0	-0.270669	0.032	0.174	0	dura	UTP23
0	-0.272095	0.019	0.131	0	dura	C8orf37-AS1
0	-0.27236	0.04	0.153	0	dura	MAOA
0	-0.273697	0.029	0.133	0	dura	HS6ST2
0	-0.275034	0.034	0.144	0	dura	NFATC2
0	-0.275355	0.12	0.288	0	dura	UPF2
0	-0.278008	0.058	0.166	0	dura	ST3GAL1
0	-0.279024	0.063	0.2	0	dura	ERO1B
0	-0.280126	0.008	0.116	0	dura	AL096854.1
0	-0.280298	0.022	0.116	0	dura	LINC02241
0	-0.281017	0.006	0.141	0	dura	AC092535.4
0	-0.281659	0.106	0.252	0	dura	CTIF
0	-0.285696	0.083	0.232	0	dura	CEP170
0	-0.286452	0.042	0.188	0	dura	PGAP1
0	-0.287296	0.061	0.186	0	dura	PER3
0	-0.290006	0.009	0.111	0	dura	AC016074.2
0	-0.290096	0.04	0.171	0	dura	SHB
0	-0.29025	0.11	0.276	0	dura	RAB40C
0	-0.290343	0.122	0.28	0	dura	TOM1L1
0	-0.290736	0.122	0.266	0	dura	UBXN7
0	-0.292255	0.092	0.257	0	dura	STIP1
0	-0.292453	0.031	0.201	0	dura	CPT1A
0	-0.294541	0.155	0.3	0	dura	CMTM4
0	-0.295917	0.025	0.195	0	dura	ZNF512
0	-0.297225	0.021	0.116	0	dura	SCUBE2
0	-0.297871	0.004	0.118	0	dura	BBOX1-AS1
0	-0.299538	0.714	0.536	0	dura	MBOAT2
0	-0.30115	0.005	0.139	0	dura	UNC80
0	-0.301278	0.201	0.347	0	dura	ASXL2
0	-0.302586	0.102	0.246	0	dura	GCNT1
0	-0.302939	0.075	0.204	0	dura	SCNN1A
0	-0.302957	0.112	0.285	0	dura	CLSTN1
0	-0.304555	0.021	0.154	0	dura	CELF4
0	-0.305123	0.009	0.119	0	dura	AC114316.1
0	-0.305617	0.003	0.11	0	dura	GRIK3
0	-0.306744	0.81	0.871	0	dura	USP34
0	-0.307249	0.017	0.144	0	dura	SMYD2
0	-0.308051	0.004	0.105	0	dura	STOX2
0	-0.308513	0.05	0.165	0	dura	SPTBN2
0	-0.309234	0.004	0.173	0	dura	ARMCX4
0	-0.312196	0.001	0.157	0	dura	CAB39L
0	-0.312412	0.021	0.13	0	dura	CSMD2
0	-0.313518	0.034	0.179	0	dura	ANKRD6
0	-0.313646	0.006	0.127	0	dura	LINC02055
0	-0.314589	0.004	0.101	0	dura	SNCAIP
0	-0.315119	0.016	0.137	0	dura	ROR2
0	-0.315823	0.017	0.121	0	dura	DOCK3
0	-0.317179	0.146	0.289	0	dura	ARHGAP8
0	-0.318853	0.83	0.517	0	dura	NAALADL2
0	-0.319139	0.17	0.319	0	dura	ARHGAP12
0	-0.319581	0.049	0.17	0	dura	KCNJ6
0	-0.320177	0.021	0.119	0	dura	SCGN
0	-0.320272	0.002	0.117	0	dura	C22orf34
0	-0.321125	0.173	0.31	0	dura	SEM1
0	-0.321201	0.006	0.11	0	dura	RGS6
0	-0.321241	0.007	0.111	0	dura	POU6F2
0	-0.323258	0.153	0.287	0	dura	SPTBN1
0	-0.323338	0.184	0.308	0	dura	PCNX2
0	-0.323974	0.553	0.719	0	dura	PICALM
0	-0.324119	0.003	0.112	0	dura	AC079160.1
0	-0.324126	0.001	0.127	0	dura	IGSF1
0	-0.32438	0.922	0.844	0	dura	MAGI1
0	-0.324642	0.078	0.195	0	dura	DPYD
0	-0.324709	0.023	0.175	0	dura	KLF12
0	-0.325628	0.175	0.313	0	dura	ELP4
0	-0.32816	0.291	0.454	0	dura	AGO3
0	-0.328317	0.005	0.109	0	dura	PLCXD3
0	-0.328545	0.003	0.15	0	dura	IGSF21
0	-0.328562	0.027	0.124	0	dura	SRRM4
0	-0.330196	0.018	0.127	0	dura	CMTM7
0	-0.330371	0.098	0.266	0	dura	EPB41L4B
0	-0.330373	0.113	0.265	0	dura	EGLN1
0	-0.330773	0.05	0.188	0	dura	PTPN14
0	-0.331122	0.11	0.29	0	dura	CKAP5
0	-0.332492	0.013	0.133	0	dura	LINC02542
0	-0.332781	0.458	0.272	0	dura	RHOBTB1
0	-0.337181	0.217	0.381	0	dura	GLG1
0	-0.33846	0.008	0.137	0	dura	DCLK1
0	-0.338858	0.005	0.179	0	dura	TRIM2
0	-0.339475	0.019	0.104	0	dura	LINC02232
0	-0.340384	0.002	0.108	0	dura	AC099517.1
0	-0.342459	0.001	0.127	0	dura	LINC02438
0	-0.343224	0.122	0.28	0	dura	COG7
0	-0.343846	0.018	0.122	0	dura	AC060765.2
0	-0.344119	0.141	0.286	0	dura	TTC39C
0	-0.34418	0.175	0.329	0	dura	CCDC18-AS1
0	-0.346289	0.055	0.172	0	dura	CASC19
0	-0.346982	0.227	0.403	0	dura	SEPTIN2
0	-0.347333	0	0.11	0	dura	CDH2
0	-0.348646	0.007	0.176	0	dura	MBNL2
0	-0.349339	0.003	0.125	0	dura	LINC00861
0	-0.353031	0.038	0.172	0	dura	SH3RF3
0	-0.353803	0.051	0.188	0	dura	NMNAT2
0	-0.353923	0.078	0.205	0	dura	SORL1
0	-0.354862	0.352	0.551	0	dura	GIGYF2
0	-0.354906	0.009	0.11	0	dura	PTPRD
0	-0.355563	0.003	0.15	0	dura	ZSCAN31
0	-0.355748	0.006	0.106	0	dura	ADAM2
0	-0.356466	0.169	0.324	0	dura	SLC38A1
0	-0.358213	0.003	0.118	0	dura	NLRP1
0	-0.358436	0.212	0.327	0	dura	WNK2
0	-0.359494	0.264	0.409	0	dura	JARID2
0	-0.359908	0.187	0.377	0	dura	FNBP4
0	-0.362585	0.151	0.327	0	dura	ZNF827
0	-0.365218	0.177	0.345	0	dura	ITGB3BP
0	-0.367315	0.157	0.325	0	dura	TMEM181
0	-0.367481	0.893	0.784	0	dura	LPP
0	-0.36857	0.015	0.158	0	dura	KIAA1211L
0	-0.368785	0.19	0.397	0	dura	GPBP1L1
0	-0.368981	0.016	0.185	0	dura	NFASC
0	-0.370887	0.004	0.217	0	dura	CHD1
0	-0.371855	0.011	0.111	0	dura	AC011246.1
0	-0.371927	0.023	0.149	0	dura	CASC8
0	-0.372351	0.316	0.485	0	dura	USP3
0	-0.372553	0	0.114	0	dura	AC021504.1
0	-0.373327	0.064	0.183	0	dura	NHS
0	-0.373335	0.132	0.336	0	dura	NUP160
0	-0.374231	0.439	0.366	0	dura	NR3C2
0	-0.374421	0	0.138	0	dura	AC009315.1
0	-0.376346	0.134	0.293	0	dura	CTTN
0	-0.376928	0.116	0.321	0	dura	ORC4
0	-0.377383	0.351	0.257	0	dura	SLC35F3
0	-0.37768	0.318	0.481	0	dura	ANAPC16
0	-0.37779	0.307	0.463	0	dura	REEP3
0	-0.379041	0.148	0.297	0	dura	OSBPL1A
0	-0.379135	0.354	0.555	0	dura	SENP6
0	-0.3794	0.062	0.256	0	dura	ARL17B
0	-0.379539	0.261	0.412	0	dura	RAB3GAP2
0	-0.37972	0.166	0.33	0	dura	TATDN1
0	-0.37994	0.221	0.413	0	dura	USP33
0	-0.381161	0.163	0.295	0	dura	PIP4K2A
0	-0.385063	0.444	0.597	0	dura	2006-03-01
0	-0.387369	0.02	0.229	0	dura	RGL3
0	-0.388994	0.859	0.932	0	dura	AGAP1
0	-0.390587	0.064	0.192	0	dura	PDE8B
0	-0.393253	0.25	0.397	0	dura	GLCCI1
0	-0.394698	0.467	0.642	0	dura	WAC
0	-0.394935	0.135	0.338	0	dura	WWP2
0	-0.395772	0.481	0.673	0	dura	TNRC6B
0	-0.39645	0.085	0.285	0	dura	SNHG25
0	-0.397733	0.061	0.232	0	dura	TNIK
0	-0.397906	0.218	0.204	0	dura	PRLR
0	-0.398012	0.009	0.105	0	dura	SYN3
0	-0.399918	0.006	0.228	0	dura	RB1
0	-0.402306	0.034	0.207	0	dura	KCND3
0	-0.403952	0.336	0.519	0	dura	MORF4L2
0	-0.404898	0.764	0.569	0	dura	CACNA1D
0	-0.405593	0.011	0.208	0	dura	CAP2
0	-0.406154	0.308	0.504	0	dura	ESRP1
0	-0.406415	0.274	0.484	0	dura	RAB1A
0	-0.408262	0.085	0.217	0	dura	MAP3K20
0	-0.408547	0.062	0.171	0	dura	CRYBG3
0	-0.409049	0.107	0.287	0	dura	LRP5
0	-0.410872	0.034	0.167	0	dura	CD44
0	-0.411333	0.103	0.255	0	dura	IQSEC1
0	-0.412877	0.004	0.109	0	dura	CHL1
0	-0.414071	0.062	0.228	0	dura	GNG4
0	-0.414712	0.168	0.338	0	dura	HSPD1
0	-0.415125	0.01	0.152	0	dura	NEGR1
0	-0.415668	0.295	0.469	0	dura	CASZ1
0	-0.417762	0.297	0.48	0	dura	FXR1
0	-0.419841	0.004	0.194	0	dura	AC107223.1
0	-0.420582	0.884	0.916	0	dura	PPP6R3
0	-0.422511	0.357	0.539	0	dura	ZNF609
0	-0.422931	0.191	0.389	0	dura	SGK3
0	-0.423575	0.345	0.547	0	dura	TTC17
0	-0.423714	0.128	0.289	0	dura	PRKCH
0	-0.424247	0.829	0.898	0	dura	FTX
0	-0.424248	0.017	0.164	0	dura	JAM3
0	-0.424365	0.021	0.189	0	dura	RIMBP2
0	-0.425011	0.359	0.55	0	dura	CHD9
0	-0.425095	0.024	0.133	0	dura	ADARB2
0	-0.42646	0.14	0.287	0	dura	RAPGEF5
0	-0.426978	0.01	0.157	0	dura	LAMA3
0	-0.427978	0.023	0.161	0	dura	EPHB1
0	-0.429485	0.025	0.14	0	dura	UNC79
0	-0.430685	0.168	0.311	0	dura	MARK1
0	-0.430913	0.489	0.702	0	dura	TTC3
0	-0.431086	0.018	0.125	0	dura	AC093865.1
0	-0.431124	0.005	0.11	0	dura	USH2A
0	-0.431215	0.003	0.157	0	dura	2011-03-01
0	-0.431242	0.015	0.137	0	dura	CACNA2D3
0	-0.431388	0.236	0.43	0	dura	TIAM2
0	-0.434908	0.001	0.17	0	dura	AC009262.1
0	-0.435398	0.002	0.139	0	dura	ANO5
0	-0.436644	0.362	0.548	0	dura	FTO
0	-0.437829	0.21	0.4	0	dura	EPB41
0	-0.437936	0.425	0.569	0	dura	PTGES3
0	-0.438208	0.352	0.484	0	dura	PPP1CB
0	-0.438277	0.036	0.144	0	dura	ZNF350-AS1
0	-0.439703	0.224	0.363	0	dura	STXBP5
0	-0.442399	0.037	0.162	0	dura	AC012501.2
0	-0.443857	0.008	0.132	0	dura	RUNX1T1
0	-0.443933	0.003	0.145	0	dura	DNAH8
0	-0.444194	0.013	0.147	0	dura	ST18
0	-0.447533	0.58	0.763	0	dura	ARID4B
0	-0.448756	0.055	0.173	0	dura	UST
0	-0.450939	0.559	0.386	0	dura	KLK2
0	-0.451028	0.061	0.246	0	dura	NEXMIF
0	-0.451446	0.006	0.14	0	dura	SNTG2
0	-0.453078	0.049	0.193	0	dura	CHST11
0	-0.456397	0.511	0.673	0	dura	UMAD1
0	-0.45922	0.175	0.3	0	dura	AC105052.4
0	-0.459335	0.142	0.341	0	dura	FAM214A
0	-0.461276	0.169	0.339	0	dura	JAZF1
0	-0.461295	0.233	0.372	0	dura	CARMIL1
0	-0.464499	0.533	0.656	0	dura	DNAH14
0	-0.466028	0.108	0.228	0	dura	PRSS23
0	-0.466143	0.135	0.235	0	dura	NRCAM
0	-0.467328	0.146	0.283	0	dura	XYLT1
0	-0.46854	0.239	0.366	0	dura	SYBU
0	-0.470482	0.001	0.155	0	dura	MIR4713HG
0	-0.471488	0.078	0.217	0	dura	SLC7A11
0	-0.474765	0.254	0.155	0	dura	RORB
0	-0.47574	0.125	0.258	0	dura	MICAL2
0	-0.478275	0.752	0.853	0	dura	KANSL1
0	-0.479423	0.29	0.471	0	dura	KMT5B
0	-0.480146	0.368	0.526	0	dura	LIFR
0	-0.481575	0.004	0.127	0	dura	PCSK2
0	-0.48199	0.003	0.153	0	dura	AL137139.2
0	-0.482047	0.946	0.782	0	dura	PVT1
0	-0.483695	0	0.161	0	dura	AL354994.1
0	-0.484084	0.513	0.682	0	dura	TANC2
0	-0.484198	0.09	0.199	0	dura	TENM4
0	-0.484576	0.087	0.188	0	dura	PLCL2
0	-0.484834	0.091	0.217	0	dura	OSBPL3
0	-0.490157	0.002	0.112	0	dura	LINC02307
0	-0.491365	0.23	0.411	0	dura	RAD9A
0	-0.492415	0.002	0.142	0	dura	MYT1L
0	-0.493248	0.105	0.179	0	dura	AP000829.1
0	-0.494157	0.394	0.631	0	dura	GNB1
0	-0.494273	0.109	0.246	0	dura	LINC02428
0	-0.494312	0.002	0.162	0	dura	AL583808.1
0	-0.496851	0.484	0.715	0	dura	CLASP1
0	-0.497475	0.005	0.101	0	dura	LINC01470
0	-0.498539	0.075	0.181	0	dura	BTBD11
0	-0.498564	0.223	0.497	0	dura	CELF1
0	-0.502018	0.219	0.45	0	dura	GALNT2
0	-0.502521	0.339	0.486	0	dura	AK3
0	-0.503724	0.249	0.415	0	dura	REV3L
0	-0.505779	0.015	0.14	0	dura	CNTN4
0	-0.506893	0	0.178	0	dura	PLEKHG4B
0	-0.510191	0.353	0.511	0	dura	SVIL
0	-0.511761	0.317	0.566	0	dura	AMBRA1
0	-0.512337	0.363	0.62	0	dura	MLLT10
0	-0.512694	0.006	0.213	0	dura	ZNF608
0	-0.515535	0.468	0.699	0	dura	SIPA1L3
0	-0.516683	0.013	0.191	0	dura	JAKMIP2
0	-0.51704	0.018	0.208	0	dura	LINC02646
0	-0.518183	0.001	0.108	0	dura	AC016152.1
0	-0.521511	0.109	0.251	0	dura	SIPA1L2
0	-0.523413	0.002	0.112	0	dura	KLB
0	-0.523484	0.167	0.431	0	dura	KIF1B
0	-0.523661	0.152	0.437	0	dura	UBE4B
0	-0.526416	0.073	0.239	0	dura	SDK2
0	-0.527033	0.247	0.501	0	dura	LRRFIP1
0	-0.532469	0.811	0.894	0	dura	PATJ
0	-0.535941	0	0.105	0	dura	AC074237.1
0	-0.537662	0.009	0.158	0	dura	AC009264.1
0	-0.540149	0.462	0.656	0	dura	ENAH
0	-0.541454	0.003	0.125	0	dura	NELL1
0	-0.544534	0.013	0.143	0	dura	CSMD1
0	-0.547172	0	0.216	0	dura	LINC01456
0	-0.548056	0.254	0.51	0	dura	LRCH3
0	-0.549125	0.405	0.626	0	dura	DIP2C
0	-0.549894	0.13	0.269	0	dura	ZBTB7C
0	-0.551766	0.202	0.438	0	dura	RTN4
0	-0.552172	0.21	0.418	0	dura	TJP1
0	-0.553098	0.046	0.25	0	dura	GDAP1
0	-0.554702	0.437	0.628	0	dura	MBNL1
0	-0.558463	0.263	0.433	0	dura	KANSL1L
0	-0.55961	0.003	0.14	0	dura	LMO3
0	-0.560038	0.013	0.156	0	dura	TRIM5
0	-0.562154	0.163	0.358	0	dura	MT-ATP8
0	-0.562395	0.271	0.482	0	dura	SDCCAG8
0	-0.56266	0.005	0.198	0	dura	KCNH8
0	-0.564127	0.297	0.479	0	dura	RPS6KC1
0	-0.567473	0.402	0.603	0	dura	MIRLET7BHG
0	-0.567668	0.306	0.489	0	dura	KIAA1324
0	-0.56914	0.005	0.137	0	dura	LINC01500
0	-0.572034	0.123	0.34	0	dura	ABHD3
0	-0.572982	0.472	0.749	0	dura	MACF1
0	-0.573663	0.84	0.904	0	dura	PARD3
0	-0.575529	0.004	0.168	0	dura	FGF12
0	-0.57553	0.364	0.604	0	dura	CCNY
0	-0.576366	0.272	0.468	0	dura	CAMTA1
0	-0.57668	0.217	0.409	0	dura	SREBF2
0	-0.577864	0.079	0.218	0	dura	SOX6
0	-0.579697	0.052	0.215	0	dura	TSHZ2
0	-0.580494	0.469	0.68	0	dura	NCOA1
0	-0.580687	0.005	0.258	0	dura	FIRRE
0	-0.584171	0.889	0.913	0	dura	TBL1XR1
0	-0.587967	0.369	0.588	0	dura	DHRSX
0	-0.589412	0.007	0.129	0	dura	CNTN5
0	-0.589625	0.095	0.261	0	dura	NRP1
0	-0.59121	0.085	0.261	0	dura	KLHL29
0	-0.591422	0.316	0.459	0	dura	PPFIA1
0	-0.591445	0.095	0.211	0	dura	PIP5K1B
0	-0.592108	0.777	0.679	0	dura	AUTS2
0	-0.592453	0	0.165	0	dura	AL356413.1
0	-0.594799	0.005	0.224	0	dura	CACNA1B
0	-0.596947	0.002	0.161	0	dura	MIR548XHG
0	-0.60962	0.344	0.604	0	dura	PHF21A
0	-0.609789	0.039	0.152	0	dura	PLCL1
0	-0.613211	0	0.21	0	dura	TBL1Y
0	-0.613448	0	0.184	0	dura	AL139023.1
0	-0.613721	0.061	0.287	0	dura	SLC36A4
0	-0.615933	0.163	0.322	0	dura	EFNA5
0	-0.616575	0.564	0.765	0	dura	FNDC3B
0	-0.617434	0.277	0.552	0	dura	MIB1
0	-0.625732	0.045	0.174	0	dura	SLCO3A1
0	-0.626632	0.006	0.252	0	dura	STK33
0	-0.629959	0.187	0.37	0	dura	APP
0	-0.630263	0.194	0.367	0	dura	EHF
0	-0.6345	0.248	0.364	0	dura	ACSL3
0	-0.636059	0.003	0.116	0	dura	DPP10
0	-0.64239	0.171	0.458	0	dura	HIBCH
0	-0.649384	0.002	0.127	0	dura	CRISP3
0	-0.649788	0.046	0.167	0	dura	GALNT13
0	-0.65011	0.005	0.222	0	dura	DANT2
0	-0.658655	0.174	0.455	0	dura	GSE1
0	-0.659879	0.015	0.182	0	dura	SLC24A3
0	-0.660523	0.286	0.586	0	dura	C11orf49
0	-0.668973	0.513	0.39	0	dura	LINC02163
0	-0.670675	0.025	0.228	0	dura	ADCY2
0	-0.674312	0.04	0.171	0	dura	PRKG1
0	-0.675256	0.013	0.254	0	dura	TIAM1
0	-0.67555	0.095	0.372	0	dura	LDLRAD3
0	-0.679517	0.352	0.565	0	dura	SORBS2
0	-0.683121	0.059	0.281	0	dura	ZNF532
0	-0.683472	0.742	0.853	0	dura	TPD52
0	-0.687931	0.014	0.261	0	dura	DAPK1
0	-0.687947	0.059	0.218	0	dura	NAV2
0	-0.692606	0.461	0.356	0	dura	CACNA2D1
0	-0.706457	0.66	0.364	0	dura	LSAMP
0	-0.707403	0.417	0.648	0	dura	KAZN
0	-0.71213	0.005	0.176	0	dura	AC068051.1
0	-0.721204	0.021	0.295	0	dura	FYN
0	-0.726266	0.191	0.473	0	dura	HIVEP3
0	-0.732157	0.009	0.134	0	dura	2001-03-01
0	-0.743029	0.003	0.252	0	dura	NOL4
0	-0.745718	0.213	0.328	0	dura	PCED1B
0	-0.746334	0.022	0.222	0	dura	AC024230.1
0	-0.747068	0.317	0.239	0	dura	ADGRB3
0	-0.750147	0.201	0.355	0	dura	CACNB2
0	-0.751641	0.442	0.735	0	dura	MBD5
0	-0.755181	0.105	0.227	0	dura	TMEM108
0	-0.760095	0.29	0.47	0	dura	CNKSR3
0	-0.762479	0.204	0.512	0	dura	DLEU2
0	-0.771214	0.582	0.56	0	dura	AFF3
0	-0.772334	0.036	0.248	0	dura	FP671120.4
0	-0.774516	0.247	0.483	0	dura	PBX1
0	-0.784701	0.003	0.242	0	dura	CADPS
0	-0.790449	0.071	0.343	0	dura	HIST1H2AC
0	-0.792276	0.145	0.343	0	dura	LINC00511
0	-0.806552	0.007	0.376	0	dura	FNDC3A
0	-0.808012	0.183	0.446	0	dura	AC013287.1
0	-0.812898	0.525	0.685	0	dura	KDM2A
0	-0.824357	0.002	0.359	0	dura	NLGN4Y
0	-0.829049	0.279	0.518	0	dura	HSP90AA1
0	-0.833116	0.576	0.747	0	dura	RORA
0	-0.841702	0.404	0.616	0	dura	EXT1
0	-0.843855	0.001	0.319	0	dura	LINC01748
0	-0.844245	0.009	0.197	0	dura	ADGRL3
0	-0.848557	0.123	0.325	0	dura	DLG2
0	-0.857281	0.007	0.181	0	dura	KCND2
0	-0.864348	0.006	0.193	0	dura	NCAM1
0	-0.871519	0.004	0.445	0	dura	USP9Y
0	-0.878671	0.229	0.461	0	dura	CHKA
0	-0.87959	0.001	0.138	0	dura	FAM135B
0	-0.880193	0.907	0.967	0	dura	RERE
0	-0.880239	0.05	0.297	0	dura	ERBB4
0	-0.913471	0.382	0.687	0	dura	NFIA
0	-0.927702	0.036	0.279	0	dura	AC116049.2
0	-0.9286	0.178	0.412	0	dura	MTSS1
0	-0.931089	0.001	0.143	0	dura	AC016687.3
0	-0.931135	0.002	0.104	0	dura	SORCS3
0	-0.945894	0.241	0.481	0	dura	NEBL
0	-0.959172	0.252	0.278	0	dura	FOXP2
0	-0.964355	0.003	0.189	0	dura	RGS7
0	-0.965178	0.004	0.159	0	dura	FAT3
0	-0.965193	0.067	0.335	0	dura	FBXO32
0	-0.994125	0.571	0.569	0	dura	PCAT1
0	-0.997211	0.004	0.168	0	dura	CNTNAP5
0	-1.00537	0.018	0.24	0	dura	ELMO1
0	-1.00852	0.007	0.186	0	dura	CHRM3
0	-1.01522	0.009	0.118	0	dura	PCDH15
0	-1.01719	0.111	0.348	0	dura	ST6GAL1
0	-1.02141	0.476	0.661	0	dura	C11orf80
0	-1.0227	0.002	0.24	0	dura	AC009478.1
0	-1.02615	0.004	0.18	0	dura	LINGO2
0	-1.03635	0.115	0.412	0	dura	STXBP5L
0	-1.04884	0.14	0.312	0	dura	SLC44A5
0	-1.05266	0.034	0.261	0	dura	THSD7A
0	-1.05666	0.005	0.267	0	dura	LINC02197
0	-1.08848	0.049	0.322	0	dura	FRMD4A
0	-1.10675	0.108	0.233	0	dura	ERG
0	-1.12351	0.001	0.128	0	dura	CDH20
0	-1.13222	0.008	0.362	0	dura	SPAG16
0	-1.13629	0.057	0.383	0	dura	DLEU1
0	-1.15057	0.651	0.63	0	dura	AKT3
0	-1.15236	0.133	0.478	0	dura	LDLRAD4
0	-1.15271	0.006	0.451	0	dura	TTTY14
0	-1.1678	0.03	0.427	0	dura	NCALD
0	-1.18096	0.018	0.171	0	dura	AMPH
0	-1.20585	0.007	0.629	0	dura	UTY
0	-1.22462	0.001	0.131	0	dura	AC113137.1
0	-1.23115	0.002	0.184	0	dura	KCNH7
0	-1.25799	0.302	0.439	0	dura	NRXN3
0	-1.28808	0.138	0.412	0	dura	DTNA
0	-1.29378	0.003	0.314	0	dura	GNGT1
0	-1.31176	0.607	0.307	0	dura	NLGN1
0	-1.35256	0.067	0.268	0	dura	KCNJ3
0	-1.40573	0.186	0.466	0	dura	KCNMB2-AS1
0	-1.41875	0.428	0.562	0	dura	RIMS2
0	-1.42797	0.513	0.632	0	dura	SDK1
0	-1.43295	0.046	0.256	0	dura	CACNA1A
0	-1.46063	0.209	0.535	0	dura	PTPRN2
0	-1.50235	0.043	0.149	0	dura	LINC02377
0	-1.52457	0.068	0.165	0	dura	PCDH9
0	-1.58734	0.366	0.565	0	dura	ITPR2
0	-1.58751	0.511	0.436	0	dura	TRPS1
0	-1.59169	0.001	0.2	0	dura	LINC02484
0	-1.592	0.543	0.482	0	dura	AR
0	-1.63971	0.004	0.479	0	dura	LINC01876
0	-1.67381	0.016	0.211	0	dura	LINC01811
0	-1.7301	0.106	0.498	0	dura	CAMK1D
0	-1.74722	0.021	0.208	0	dura	NRXN1
0	-1.89133	0.021	0.487	0	dura	TOX
0	-1.93001	0.005	0.546	0	dura	AL117329.1
0	-2.07267	0.016	0.127	0	dura	RBFOX1
0	-2.13319	0.004	0.285	0	dura	KCNB2
0	-2.63591	0.017	0.239	0	dura	FP236383.3
0	-3.05257	0.001	0.282	0	dura	SCHLAP1
0	-3.40245	0.025	0.226	0	dura	RALYL
9.88131291682493e-324	-0.320172	0.201	0.347	1.64662198445971e-319	dura	STRN
1.97626258336499e-323	0.251901	0.346	0.194	3.29324396891941e-319	dura	PDZD8
8.39911597930119e-323	-0.382813	0.294	0.436	1.39962868679075e-318	dura	LARP1B
3.16202013338398e-322	0.287798	0.523	0.382	5.26919035027106e-318	dura	UBAP1
3.02862240900684e-321	0.258992	0.368	0.211	5.046896382369e-317	dura	TAPT1-AS1
1.56223557215002e-320	-0.275149	0.072	0.188	2.6033093574308e-316	dura	RBM4
1.43744108697377e-315	-0.361755	0.068	0.18	2.39535182733308e-311	dura	FAM149A
1.92632473516992e-315	-0.681711	0.429	0.463	3.21002753868715e-311	dura	KCNMB2
1.53301397602965e-314	0.274533	0.334	0.192	2.5546144896558e-310	dura	EVA1C
4.70841191453069e-314	0.284102	0.564	0.401	7.84609761437394e-310	dura	SLC25A13
1.43006845210624e-313	-0.273065	0.517	0.683	0	dura	MAP4K3
1.29537371895716e-312	-0.341967	0.14	0.265	0	dura	FMNL2
2.27661215472425e-312	-0.307406	0.273	0.426	3.79375e-308	dura	TASOR2
3.12202471971776e-312	0.31924	0.507	0.4	5.20254e-308	dura	SEPTIN9
1.46245083694139e-311	-0.251994	0.133	0.265	2.43703e-307	dura	CCT4
1.58759311204711e-311	-0.401631	0.207	0.333	2.64557e-307	dura	SRGAP1
3.86778316738593e-311	-0.327091	0.036	0.128	6.44527e-307	dura	GRM7
4.21923935024272e-311	-0.273462	0.124	0.253	7.03094e-307	dura	ERN1
3.38292577033834e-310	-0.286489	0.134	0.255	5.63731e-306	dura	MIA3
4.58201077931716e-310	0.28731	0.494	0.34	7.63546e-306	dura	EEA1
0	-0.34889	0.241	0.371	2.58351e-305	dura	PRKACB
0	-0.301251	0.065	0.171	5.13515e-305	dura	FDFT1
0	-0.276696	0.228	0.371	2.05623e-304	dura	USP48
0	0.263728	0.402	0.265	2.64928e-304	dura	WTAP
0	0.290294	0.605	0.476	3.52339e-304	dura	BTRC
5.75866e-308	0.274547	0.58	0.437	9.59622e-304	dura	CNOT4
8.63578e-308	-0.333825	0.767	0.809	1.43907e-303	dura	BIRC6
1.64948e-307	-0.279523	0.033	0.126	2.7487e-303	dura	ELAVL2
1.72553e-307	0.270362	0.782	0.644	2.87542e-303	dura	FAM172A
1.11977e-306	-0.321829	0.141	0.265	1.86598e-302	dura	SPATS2L
1.221e-306	-0.344678	0.284	0.421	2.03468e-302	dura	KIF5C
7.04048e-306	-0.29048	0.237	0.38	1.17323e-301	dura	HERC2
4.26651e-305	-0.357061	0.459	0.603	7.10972e-301	dura	PHC3
4.51543e-303	0.273801	0.491	0.339	7.5245e-299	dura	GALNT11
1.0328e-302	0.272791	0.554	0.386	1.72106e-298	dura	ZNF407
3.45704e-301	-0.292677	0.248	0.391	5.76081e-297	dura	ZNF544
5.35503e-301	-0.416135	0.14	0.265	8.92362e-297	dura	GALNT18
5.95164e-301	0.462712	0.285	0.192	9.91781e-297	dura	RUNX1
9.34251e-301	-0.319635	0.212	0.335	1.55684e-296	dura	COPB2
1.4995e-300	0.268978	0.404	0.264	2.49877e-296	dura	IFT43
1.74901e-300	-0.269309	0.195	0.34	2.91455e-296	dura	CDC27
5.31319e-300	-0.258908	0.137	0.266	8.8539e-296	dura	PTPRF
2.41087e-298	0.270341	0.492	0.337	4.01748e-294	dura	RHEB
5.82543e-297	-0.27806	0.135	0.253	9.7075e-293	dura	TSPAN9
9.02785e-297	-0.401964	0.271	0.293	1.5044e-292	dura	GABRB3
1.04265e-296	-0.371389	0.522	0.664	1.73747e-292	dura	NFAT5
3.14044e-296	-0.26061	0.156	0.283	5.23324e-292	dura	ZNF706
5.3154e-295	-0.305226	0.209	0.326	8.85758e-291	dura	SYT17
7.43551e-295	-0.309813	0.414	0.564	1.23905e-290	dura	PKN2
8.74493e-295	0.272318	0.526	0.378	1.45726e-290	dura	TBCA
2.00193e-293	-0.261373	0.154	0.279	3.33602e-289	dura	SNX14
5.95721e-293	0.371519	0.514	0.356	9.9271e-289	dura	EZH2
6.45876e-293	0.266806	0.697	0.565	1.07629e-288	dura	RAPGEF6
1.87561e-292	-0.297999	0.035	0.118	3.12552e-288	dura	CACHD1
1.92415e-292	-0.56253	0.039	0.12	3.2064e-288	dura	LUZP2
5.24232e-292	-0.529633	0.109	0.199	8.73579e-288	dura	PDE4B
4.34586e-291	-0.329022	0.248	0.378	7.24194e-287	dura	SPIRE1
7.20872e-291	-0.403727	0.212	0.237	1.20126e-286	dura	LINC02315
8.06893e-291	-0.332368	0.231	0.344	1.34461e-286	dura	DGKD
2.86853e-290	0.275953	0.708	0.562	4.78012e-286	dura	HDAC4
3.06655e-290	-0.299099	0.099	0.21	5.1101e-286	dura	PAM
7.21047e-290	-0.30577	0.411	0.564	1.20155e-285	dura	ZMYM4
6.40337e-289	-0.388999	0.375	0.515	1.06706e-284	dura	ATP8B1
1.99561e-288	0.265143	0.522	0.361	3.32548e-284	dura	RAB28
7.87932e-286	-0.366331	0.214	0.332	1.31301e-281	dura	ENO1
3.81904e-285	0.283486	0.58	0.427	6.36404e-281	dura	HIBADH
1.07026e-284	-0.275267	0.215	0.345	1.78347e-280	dura	EPC1
2.31973e-283	-0.57259	0.656	0.686	3.86559e-279	dura	WWOX
2.98556e-283	-0.374601	0.425	0.552	4.97514e-279	dura	TMEM135
7.0559e-283	-0.25214	0.33	0.264	1.1758e-278	dura	ESRRG
1.36416e-282	0.310945	0.382	0.238	2.27324e-278	dura	ZFX
5.8888e-282	-0.370998	0.205	0.28	9.8131e-278	dura	SASH1
2.91319e-281	-0.250614	0.11	0.222	4.85454e-277	dura	KIAA1324L
3.50978e-281	-0.367424	0.054	0.143	5.84869e-277	dura	LINC01285
2.4681e-280	-0.311689	0.384	0.531	4.11284e-276	dura	ANKS1A
7.80134e-280	-0.294334	0.537	0.687	1.30001e-275	dura	FOXJ3
8.76063e-280	-0.265195	0.249	0.383	1.45987e-275	dura	SRSF11
9.59218e-280	-0.591079	0.111	0.214	1.59844e-275	dura	AL008633.1
1.32271e-279	-0.343728	0.344	0.462	2.20416e-275	dura	PIK3CB
2.30817e-279	-0.276869	0.237	0.365	3.84634e-275	dura	TRPM7
1.60335e-278	-0.448142	0.062	0.146	2.67183e-274	dura	GABRG3
4.64129e-278	-0.342392	0.271	0.39	7.73424e-274	dura	HS2ST1
5.04313e-278	-0.325782	0.179	0.163	8.40387e-274	dura	SLIT2
5.39294e-278	-0.599457	0.213	0.35	8.98679e-274	dura	MIR2052HG
9.46006e-278	-0.271743	0.216	0.343	1.57642e-273	dura	INTS8
9.84626e-278	-0.369128	0.347	0.472	1.64078e-273	dura	LIMS1
4.3762e-277	0.298371	0.607	0.457	7.2925e-273	dura	NOS1AP
3.47842e-276	0.254378	0.379	0.254	5.79643e-272	dura	APLP2
7.37191e-276	-0.513084	0.478	0.582	1.22846e-271	dura	FAM13A
7.52744e-275	-0.822136	0.077	0.133	1.25437e-270	dura	LINC01006
9.46359e-275	0.251967	0.503	0.369	1.57701e-270	dura	HNRNPD
1.19433e-274	-0.345158	0.212	0.299	1.99024e-270	dura	NOVA1
2.45339e-274	-0.269365	0.078	0.179	4.08833e-270	dura	GNPTAB
9.69224e-274	-0.280109	0.225	0.343	1.61511e-269	dura	LYPLAL1
5.92484e-272	-0.254314	0.279	0.209	9.87315e-268	dura	AF165147.1
6.16263e-272	-0.309636	0.757	0.856	1.02694e-267	dura	PUM2
1.34281e-271	0.317928	0.539	0.384	2.23766e-267	dura	EEPD1
5.10112e-271	-0.282268	0.467	0.617	8.50051e-267	dura	PTBP2
3.45086e-269	-0.327783	0.499	0.642	5.75051e-265	dura	FNBP1L
1.13576e-268	-0.321226	0.201	0.315	1.89263e-264	dura	MIER1
1.43389e-268	-0.31092	0.07	0.169	2.38944e-264	dura	CNN3
1.78102e-268	0.256899	0.888	0.784	2.9679e-264	dura	RAD51B
4.58204e-268	-0.290867	0.28	0.404	7.63552e-264	dura	SEC63
3.82291e-267	-0.474063	0.197	0.293	6.3705e-263	dura	BCL2
1.67594e-266	-0.330357	0.039	0.125	2.79279e-262	dura	NCEH1
2.17417e-265	-0.817743	0.032	0.11	3.62303e-261	dura	LINC01322
4.67381e-265	0.261528	0.685	0.583	7.78843e-261	dura	CTNNA1
3.42037e-264	-0.277095	0.221	0.339	5.6997e-260	dura	USP6NL
1.02005e-263	-0.369571	0.215	0.2	1.69981e-259	dura	SHISA6
1.95045e-263	-0.317546	0.293	0.392	3.25024e-259	dura	CASK
4.85556e-263	0.258095	0.556	0.412	8.0913e-259	dura	TNPO1
2.92905e-262	-0.274155	0.066	0.164	4.88097e-258	dura	FRMD5
4.71001e-262	-0.258988	0.228	0.355	7.84876e-258	dura	MTX2
5.50542e-262	-0.285345	0.332	0.463	9.17423e-258	dura	VPS8
1.32086e-260	-0.314572	0.274	0.402	2.20109e-256	dura	R3HDM1
3.24009e-260	-0.281902	0.242	0.354	5.39929e-256	dura	RALGPS1
2.39921e-259	-0.516594	0.323	0.455	3.99805e-255	dura	KCNMA1
4.04127e-259	-0.490184	0.208	0.269	6.73438e-255	dura	PLXNA2
6.24718e-259	0.250207	0.567	0.467	1.04103e-254	dura	NSD1
3.56714e-258	-0.32243	0.051	0.138	5.94428e-254	dura	CUX2
5.33677e-258	-0.3791	0.093	0.177	8.8932e-254	dura	ANK2
2.25037e-256	-0.465365	0.083	0.154	3.75001e-252	dura	BANK1
1.33694e-255	0.257655	0.542	0.41	2.22787e-251	dura	USP15
1.39242e-254	0.264086	0.421	0.279	2.32033e-250	dura	RIC8B
3.5348e-254	-0.272402	0.176	0.294	5.89039e-250	dura	MAPT
4.38756e-254	-0.283805	0.247	0.367	7.31143e-250	dura	CMIP
1.12001e-253	-0.274169	0.238	0.368	1.86639e-249	dura	PHACTR4
1.95843e-252	-0.322837	0.344	0.48	3.26353e-248	dura	SSBP3
3.88587e-252	-0.261252	0.044	0.122	6.47542e-248	dura	ITPRID2
4.02687e-252	-0.398205	0.061	0.16	6.71037e-248	dura	AC069228.1
2.22328e-251	-0.250733	0.106	0.207	3.70487e-247	dura	TRAF3IP2-AS1
2.58122e-250	-0.289065	0.109	0.21	4.30135e-246	dura	DHRS3
2.90731e-250	-0.693717	0.126	0.191	4.84475e-246	dura	NKAIN2
3.78698e-250	-0.270742	0.318	0.441	6.31062e-246	dura	TUT4
6.54503e-250	-0.323372	0.037	0.125	1.09066e-245	dura	MGAT4C
3.56479e-249	0.273232	0.617	0.488	5.94037e-245	dura	ESYT2
8.51193e-249	-0.347352	0.087	0.159	1.41843e-244	dura	SLC8A1
1.88144e-248	-0.962853	0.781	0.748	3.13524e-244	dura	CDKAL1
5.90978e-248	-0.394424	0.136	0.231	9.84806e-244	dura	ABTB2
6.69936e-247	-0.743931	0.508	0.534	1.11638e-242	dura	NDRG1
4.64246e-246	0.338933	0.449	0.367	7.73619e-242	dura	POLA1
2.20134e-245	-0.319681	0.397	0.511	3.66831e-241	dura	RAB7A
4.94312e-243	-0.266394	0.037	0.113	8.23722e-239	dura	KIF26B
1.09225e-241	-0.486533	0.337	0.438	1.82013e-237	dura	MID1
1.16511e-240	-0.296803	0.315	0.452	1.94153e-236	dura	FBXL20
2.14638e-239	0.265104	0.601	0.477	3.57673e-235	dura	MYO9A
1.04344e-238	-0.27902	0.029	0.104	1.73878e-234	dura	RANBP3L
4.71042e-238	-0.266497	0.308	0.437	7.84945e-234	dura	RASA2
1.71732e-237	-0.267896	0.295	0.425	2.86174e-233	dura	RNF13
2.50802e-236	0.278851	0.762	0.666	4.17937e-232	dura	RAB10
1.21494e-235	-0.260234	0.376	0.503	2.02457e-231	dura	NAP1L4
1.34507e-234	-0.359842	0.368	0.463	2.24142e-230	dura	CHD7
8.81361e-233	-0.26437	0.182	0.3	1.4687e-228	dura	TMEM87A
1.26788e-232	-0.274739	0.237	0.358	2.1128e-228	dura	CDH1
5.84206e-232	-0.267561	0.2	0.306	9.73521e-228	dura	SLC37A1
7.61771e-230	-0.326088	0.216	0.294	1.26941e-225	dura	DST
7.74275e-230	-0.267168	0.151	0.248	1.29025e-225	dura	TTLL7
3.66908e-227	-0.446972	0.522	0.618	6.11416e-223	dura	SHANK2
3.39355e-226	-0.284736	0.966	0.94	5.655e-222	dura	JMJD1C
1.41236e-225	-0.405001	0.105	0.18	2.35355e-221	dura	CTNNA2
4.11132e-225	-0.491615	0.241	0.284	6.85111e-221	dura	AC019197.1
4.77783e-224	0.258992	0.451	0.322	7.96177e-220	dura	HIVEP1
1.56383e-223	-0.361757	0.091	0.177	2.60597e-219	dura	AC104365.1
2.86523e-223	-0.271422	0.095	0.187	4.77462e-219	dura	LMCD1-AS1
1.61078e-222	-0.30547	0.272	0.367	2.6842e-218	dura	MGAT5
1.06179e-221	-0.294962	0.574	0.7	1.76937e-217	dura	ZNF292
4.18341e-221	-0.476356	0.133	0.091	6.97123e-217	dura	PDE1A
2.31012e-220	-0.281842	0.39	0.513	3.84958e-216	dura	VPS54
1.85848e-218	-0.255616	0.239	0.352	3.09698e-214	dura	APTX
1.09682e-217	-0.38485	0.18	0.238	1.82775e-213	dura	EPHA4
6.4837e-217	-0.349333	0.145	0.244	1.08044e-212	dura	HSPH1
8.70221e-217	-0.273153	0.322	0.435	1.45014e-212	dura	EVI5
1.29283e-216	-0.281664	0.036	0.105	2.15438e-212	dura	AC084816.1
1.14616e-215	-0.273904	0.22	0.326	1.90997e-211	dura	GRB10
7.04937e-215	-0.327806	0.117	0.189	1.17471e-210	dura	STS
2.97975e-214	-0.382614	0.533	0.645	4.96546e-210	dura	MLLT3
7.34941e-212	-0.253218	0.489	0.627	1.22471e-207	dura	SOS1
2.88492e-209	-0.371797	0.127	0.217	4.80743e-205	dura	PALM2-AKAP2
9.11258e-207	-0.284594	0.156	0.234	1.51852e-202	dura	LPGAT1
1.96109e-206	-0.252778	0.375	0.495	3.26796e-202	dura	ROCK1
3.29998e-203	-0.291039	0.171	0.255	5.49908e-199	dura	UBA6-AS1
3.75935e-202	-0.375766	0.518	0.624	6.26457e-198	dura	DNAJC1
5.21633e-202	-0.391922	0.171	0.269	8.69249e-198	dura	PRELID2
2.53655e-201	-0.2674	0.245	0.364	4.2269e-197	dura	RTN3
1.11985e-198	-0.289648	0.343	0.447	1.86612e-194	dura	HLCS
8.30396e-197	-0.251001	0.889	0.891	1.38377e-192	dura	EIF4G3
3.10113e-196	-0.40784	0.486	0.462	5.16772e-192	dura	TSC22D1
2.88714e-194	-0.555105	0.521	0.589	4.81114e-190	dura	FOXO3
3.14137e-194	-0.253914	0.237	0.324	5.23478e-190	dura	KDM3A
2.41701e-193	-0.254011	0.248	0.35	4.02771e-189	dura	VAV2
3.02932e-192	-0.387022	0.331	0.359	5.04806e-188	dura	MALT1
3.51967e-192	-0.265376	0.063	0.13	5.86518e-188	dura	DHFR
7.59411e-190	-0.270675	0.086	0.154	1.26548e-185	dura	NCKAP5
9.79612e-190	-0.321043	0.284	0.326	1.63242e-185	dura	CEP112
1.18319e-186	-0.292038	0.426	0.531	1.97167e-182	dura	PDSS2
2.69436e-186	-0.3301	0.421	0.494	4.48988e-182	dura	JAK1
2.84724e-186	-0.357843	0.279	0.351	4.74464e-182	dura	UBE2E3
2.50188e-185	-0.457658	0.73	0.782	4.16914e-181	dura	CDK19
1.9491e-184	-0.263054	0.239	0.346	3.24798e-180	dura	KLHL24
5.15295e-182	0.383526	0.358	0.262	8.58688e-178	dura	MIPEP
1.32992e-181	-0.365981	0.19	0.29	2.21619e-177	dura	NIBAN1
1.79583e-180	-0.26244	0.377	0.479	2.99258e-176	dura	MICU1
7.15217e-179	-0.50991	0.257	0.231	1.19184e-174	dura	HDAC9
8.76094e-175	-0.412071	0.088	0.142	1.45992e-170	dura	AC073114.1
1.06452e-173	-0.279706	0.116	0.195	1.77392e-169	dura	VCL
7.54385e-164	-0.416992	0.401	0.407	1.25711e-159	dura	MAP2
1.10398e-163	-0.324816	0.138	0.199	1.83968e-159	dura	LEF1
3.50686e-163	-0.391689	0.072	0.132	5.84383e-159	dura	SKIL
3.93364e-163	-0.262909	0.284	0.375	6.55502e-159	dura	SLC39A11
2.03127e-162	-0.491652	0.06	0.106	3.38492e-158	dura	GRID2
2.66977e-162	-0.293599	0.255	0.227	4.44891e-158	dura	THSD4
2.93814e-162	-0.294031	0.597	0.695	4.89611e-158	dura	ZFHX3
5.33895e-161	-0.279662	0.165	0.239	8.89683e-157	dura	LINC01572
3.11014e-158	-0.293702	0.125	0.178	5.18273e-154	dura	ERC2
5.47526e-158	-0.293756	0.217	0.316	9.12397e-154	dura	NPAS2
7.34511e-156	-0.274419	0.266	0.251	1.22399e-151	dura	MIR924HG
3.13951e-155	-0.314003	0.183	0.291	5.23167e-151	dura	ROBO1
9.12074e-154	-0.252676	0.33	0.44	1.51988e-149	dura	CERS4
1.34432e-153	-0.364729	0.198	0.26	2.24018e-149	dura	HIF1A-AS3
5.90553e-153	-0.262563	0.637	0.602	9.84098e-149	dura	SETBP1
1.48878e-152	-0.269656	0.319	0.374	2.4809e-148	dura	CCSER2
6.43132e-152	-0.325965	0.693	0.673	1.07171e-147	dura	PRKD1
1.36039e-150	-0.292953	0.399	0.493	2.26696e-146	dura	CAMKMT
1.56474e-142	-0.309023	0.306	0.399	2.60749e-138	dura	MAST4
1.61359e-142	-0.291512	0.707	0.773	2.68889e-138	dura	TMCC1
2.55777e-140	-0.272988	0.475	0.562	4.26227e-136	dura	BAZ2B
2.70687e-140	-0.263739	0.496	0.584	4.51073e-136	dura	STAU2
1.96147e-139	-0.281982	0.282	0.34	3.2686e-135	dura	TACC2
8.17925e-138	-1.36319	0.124	0.165	1.36299e-133	dura	CLSTN2
5.32385e-133	-0.265785	0.312	0.355	8.87167e-129	dura	HPN
1.23735e-131	-0.270136	0.438	0.5	2.06192e-127	dura	TBL1X
1.63508e-129	-0.259299	0.072	0.144	2.7247e-125	dura	HEPACAM2
1.56513e-126	-0.506795	0.35	0.418	2.60814e-122	dura	BICD1
3.12166e-126	-0.271608	0.522	0.509	5.20194e-122	dura	MAGI3
2.29406e-119	-0.321745	0.649	0.698	3.82281e-115	dura	MIPOL1
1.04005e-115	-0.305475	0.068	0.108	1.73314e-111	dura	AL136114.1
1.23984e-105	-0.274228	0.229	0.252	2.06607e-101	dura	RBMS3
1.2454e-102	-0.268726	0.669	0.708	2.07534e-98	dura	BCAS3
1.28939e-90	-0.267665	0.556	0.616	2.14865e-86	dura	PTPRJ
3.94563e-48	-0.267393	0.119	0.133	6.575e-44	dura	AMACR
1.53288e-33	-0.253286	0.229	0.278	2.55439e-29	dura	PTPRT
0	2.61237	0.308	0.234	0	LN	SCHLAP1
0	1.58054	0.133	0.03	0	LN	TGM4
0	1.44331	0.298	0.161	0	LN	RALYL
0	1.3328	0.187	0.079	0	LN	RBFOX1
0	1.04345	0.277	0.194	0	LN	ERG
0	0.992798	0.364	0.263	0	LN	SLC44A5
0	0.912519	0.163	0.021	0	LN	AC093001.1
0	0.801768	0.332	0.194	0	LN	THSD7A
0	0.800327	0.7	0.518	0	LN	CACNA1D
0	0.769511	0.19	0.1	0	LN	AC016687.3
0	0.762998	0.189	0.064	0	LN	MSMB
0	0.750952	0.333	0.224	0	LN	ACPP
0	0.749216	0.209	0.171	0	LN	LINC02484
0	0.729308	0.292	0.193	0	LN	THSD4
0	0.701643	0.35	0.13	0	LN	MMP26
0	0.69978	0.341	0.24	0	LN	FOXP2
0	0.690796	0.252	0.131	0	LN	RGS7
0	0.678809	0.218	0.123	0	LN	PCDH9
0	0.671829	0.589	0.558	0	LN	PCAT1
0	0.661745	0.204	0.08	0	LN	2001-03-01
0	0.63825	0.229	0.254	0	LN	ADGRB3
0	0.613476	0.173	0.092	0	LN	AC113137.1
0	0.576773	0.823	0.673	0	LN	MAP3K5
0	0.572209	0.206	0.104	0	LN	LINC02377
0	0.567778	0.235	0.134	0	LN	AC068633.1
0	0.553085	0.273	0.148	0	LN	NRXN1
0	0.548931	0.158	0.083	0	LN	PCDH15
0	0.546245	0.274	0.258	0	LN	KCNB2
0	0.537637	0.231	0.126	0	LN	SLIT2
0	0.534996	0.461	0.365	0	LN	KLK2
0	0.51762	0.128	0.065	0	LN	MMP16
0	0.51182	0.417	0.343	0	LN	SPOCK1
0	0.506119	0.72	0.649	0	LN	PRKD1
0	0.503798	0.305	0.257	0	LN	PTPRT
0	0.503291	0.164	0.069	0	LN	KLB
0	0.499183	0.716	0.589	0	LN	ANKS1B
0	0.495618	0.135	0.074	0	LN	SORCS3
0	0.491268	0.595	0.531	0	LN	CPNE4
0	0.484582	0.137	0.055	0	LN	TMEM132B
0	0.483776	0.166	0.136	0	LN	FAT3
0	0.477358	0.425	0.316	0	LN	MT-CO2
0	0.476153	0.2	0.097	0	LN	DNAH8
0	0.474104	0.245	0.128	0	LN	KCNH7
0	0.470375	0.254	0.157	0	LN	PDE4B
0	0.46586	0.388	0.336	0	LN	ACSL3
0	0.465118	0.123	0.048	0	LN	AC105031.2
0	0.464745	0.459	0.357	0	LN	MTSS1
0	0.453476	0.23	0.126	0	LN	AL163541.1
0	0.452812	0.264	0.168	0	LN	PIP5K1B
0	0.4231	0.128	0.065	0	LN	ACSM1
0	0.410335	0.407	0.297	0	LN	STARD13
0	0.409632	0.241	0.135	0	LN	AP000829.1
0	0.408826	0.158	0.079	0	LN	DPP10
0	0.406715	0.775	0.666	0	LN	ARFGEF3
0	0.394835	0.298	0.274	0	LN	ROBO1
0	0.390466	0.238	0.206	0	LN	TMEM108
0	0.385262	0.444	0.363	0	LN	STEAP2
0	0.384803	0.314	0.212	0	LN	NRP1
0	0.384012	0.169	0.105	0	LN	CACNA2D3
0	0.376967	0.235	0.125	0	LN	SLCO3A1
0	0.37517	0.39	0.282	0	LN	IRS2
0	0.373115	0.211	0.077	0	LN	ADARB2
0	0.370441	0.11	0.034	0	LN	SGIP1
0	0.369232	0.472	0.363	0	LN	TJP1
0	0.364537	0.188	0.185	0	LN	NKAIN2
0	0.362595	0.696	0.694	0	LN	CAMK2D
0	0.357115	0.881	0.787	0	LN	MAP7
0	0.355481	0.171	0.089	0	LN	CDH20
0	0.349501	0.371	0.246	0	LN	GABRB3
0	0.348635	0.333	0.238	0	LN	XYLT1
0	0.33851	0.284	0.197	0	LN	LPGAT1
0	0.334735	0.234	0.151	0	LN	ITPR1
0	0.332892	0.209	0.131	0	LN	AMPH
0	0.326273	0.221	0.24	0	LN	HDAC9
0	0.325137	0.366	0.29	0	LN	TATDN1
0	0.323492	0.311	0.206	0	LN	IQSEC1
0	0.3196	0.22	0.131	0	LN	CASC19
0	0.315924	0.625	0.445	0	LN	PTPRN2
0	0.314614	0.243	0.141	0	LN	CFAP69
0	0.314337	0.236	0.137	0	LN	BTBD11
0	0.304944	0.348	0.273	0	LN	MARK1
0	0.302649	0.212	0.115	0	LN	AL583808.1
0	0.300193	0.102	0.088	0	LN	SERPINI1
0	0.298553	0.207	0.07	0	LN	OR51E2
0	0.296307	0.179	0.113	0	LN	ST18
0	0.295898	0.284	0.174	0	LN	PHF12
0	0.28831	0.209	0.12	0	LN	AC069228.1
0	0.28636	0.18	0.103	0	LN	UNC79
0	0.285457	0.126	0.052	0	LN	AP001025.1
0	0.282512	0.959	0.922	0	LN	VPS13B
0	0.279981	0.144	0.065	0	LN	SNCAIP
0	0.278558	0.198	0.114	0	LN	DOCK8
0	0.275015	0.586	0.445	0	LN	PDE3B
0	0.272538	0.157	0.075	0	LN	AC021504.1
0	0.271991	0.37	0.262	0	LN	CBR3-AS1
0	0.268201	0.206	0.096	0	LN	STEAP4
0	0.266191	0.165	0.074	0	LN	SAMD5
0	0.26441	0.127	0.062	0	LN	HS3ST5
0	0.261776	0.15	0.075	0	LN	RELN
0	0.259534	0.216	0.162	0	LN	ACADM
0	0.257977	0.235	0.177	0	LN	AL110292.1
0	0.257746	0.381	0.408	0	LN	RMST
0	0.257276	0.165	0.099	0	LN	RUNX1T1
0	0.250281	0.501	0.394	0	LN	LRIG1
0	0.250267	0.189	0.11	0	LN	HEPACAM2
0	-0.250749	0.598	0.659	0	LN	MLLT3
0	-0.250972	0.029	0.113	0	LN	PDE1C
0	-0.251363	0.428	0.547	0	LN	YEATS2
0	-0.252835	0.355	0.433	0	LN	GFPT1
0	-0.25464	0.029	0.126	0	LN	SCN2A
0	-0.257077	0.116	0.189	0	LN	OSBPL10
0	-0.257838	0.1	0.156	0	LN	ZNF350-AS1
0	-0.258296	0.773	0.797	0	LN	BRAF
0	-0.259535	0.299	0.357	0	LN	TACC2
0	-0.260415	0.074	0.152	0	LN	LINC02542
0	-0.260746	0.087	0.183	0	LN	LRRTM4
0	-0.26077	0.086	0.181	0	LN	CIT
0	-0.262856	0.035	0.126	0	LN	SEZ6L
0	-0.263028	0.044	0.128	0	LN	2001-12-01
0	-0.264391	0.342	0.412	0	LN	TXNDC16
0	-0.26445	0.186	0.294	0	LN	HIF1A-AS3
0	-0.267843	0.108	0.185	0	LN	AC009262.1
0	-0.271406	0.021	0.136	0	LN	AC104389.5
0	-0.272022	0.131	0.242	0	LN	PAM
0	-0.272767	0.181	0.311	0	LN	ARHGAP10
0	-0.276694	0.453	0.534	0	LN	ATP8B1
0	-0.278424	0.394	0.435	0	LN	RHPN2
0	-0.278631	0.12	0.192	0	LN	SCNN1G
0	-0.278927	0.39	0.475	0	LN	RNF24
0	-0.27923	0.086	0.184	0	LN	MIR548XHG
0	-0.280267	0.59	0.716	0	LN	P4HA1
0	-0.280788	0.191	0.235	0	LN	RTN1
0	-0.281746	0.748	0.845	0	LN	STAG1
0	-0.283306	0.353	0.418	0	LN	SREBF2
0	-0.283597	0.163	0.232	0	LN	SLC7A11
0	-0.285375	0.171	0.238	0	LN	LINC01619
0	-0.286346	0.595	0.652	0	LN	FARP1
0	-0.286686	0.057	0.115	0	LN	AHR
0	-0.287768	0.08	0.158	0	LN	SNTG2
0	-0.28898	0.321	0.395	0	LN	GRIP1
0	-0.289199	0.094	0.175	0	LN	PDE10A
0	-0.289564	0.642	0.723	0	LN	UBE2H
0	-0.289897	0.642	0.675	0	LN	PLCB1
0	-0.293225	0.402	0.522	0	LN	PIAS2
0	-0.293893	0.314	0.398	0	LN	EZH2
0	-0.294178	0.187	0.269	0	LN	GRAMD2B
0	-0.295584	0.912	0.935	0	LN	AGAP1
0	-0.297931	0.157	0.225	0	LN	MYBPC1
0	-0.298892	0.267	0.32	0	LN	MCCC2
0	-0.300035	0.041	0.137	0	LN	GRIK3
0	-0.30298	0.088	0.174	0	LN	AC092422.1
0	-0.303081	0.129	0.195	0	LN	FAM149A
0	-0.303457	0.275	0.383	0	LN	RNF144A
0	-0.304954	0.453	0.526	0	LN	HSP90AA1
0	-0.305512	0.345	0.432	0	LN	KIAA1217
0	-0.307655	0.044	0.12	0	LN	ATRNL1
0	-0.308557	0.053	0.138	0	LN	KIF26B
0	-0.309342	0.234	0.321	0	LN	WDR45B
0	-0.310639	0.052	0.147	0	LN	DOCK3
0	-0.311186	0.839	0.88	0	LN	FGF13
0	-0.31166	0.093	0.206	0	LN	MAML2
0	-0.314344	0.171	0.283	0	LN	AC068587.4
0	-0.318672	0.242	0.307	0	LN	CEMIP2
0	-0.319048	0.472	0.489	0	LN	TBCK
0	-0.319397	0.883	0.899	0	LN	SMYD3
0	-0.320995	0.53	0.631	0	LN	TEAD1
0	-0.322843	0.365	0.401	0	LN	DACH1
0	-0.323646	0.16	0.23	0	LN	PRLR
0	-0.326879	0.509	0.646	0	LN	CERS6
0	-0.328458	0.254	0.362	0	LN	ENO1
0	-0.329038	0.306	0.385	0	LN	MALT1
0	-0.330515	0.173	0.27	0	LN	ERO1A
0	-0.330954	0.172	0.272	0	LN	LINC02428
0	-0.332598	0.141	0.225	0	LN	LEF1
0	-0.333299	0.012	0.108	0	LN	TSPEAR
0	-0.336009	0.613	0.715	0	LN	KDM4C
0	-0.340597	0.164	0.264	0	LN	NRCAM
0	-0.34087	0.39	0.478	0	LN	PPM1E
0	-0.34152	0.138	0.234	0	LN	PLEKHB2
0	-0.342002	0.459	0.585	0	LN	FOXN3
0	-0.342275	0.151	0.281	0	LN	EPHA4
0	-0.343792	0.055	0.14	0	LN	NLRP1
0	-0.348732	0.471	0.531	0	LN	MAGI3
0	-0.348831	0.741	0.808	0	LN	GMDS
0	-0.360525	0.269	0.379	0	LN	PPFIBP1
0	-0.360593	0.164	0.124	0	LN	TENM2
0	-0.360994	0.744	0.667	0	LN	GRHL2
0	-0.362994	0.339	0.438	0	LN	EDA
0	-0.363213	0.098	0.185	0	LN	SLC8A1
0	-0.364006	0.064	0.193	0	LN	KIAA1211L
0	-0.364849	0.047	0.148	0	LN	CACHD1
0	-0.36521	0.069	0.125	0	LN	AL136114.1
0	-0.365536	0.044	0.156	0	LN	LINC00861
0	-0.365913	0.473	0.565	0	LN	NDRG1
0	-0.368316	0.533	0.646	0	LN	PRKCE
0	-0.370072	0.669	0.734	0	LN	PCCA
0	-0.373497	0.07	0.142	0	LN	NELL1
0	-0.382361	0.114	0.211	0	LN	RARB
0	-0.386787	0.154	0.298	0	LN	FHOD3
0	-0.390502	0.104	0.204	0	LN	KCND2
0	-0.396667	0.253	0.37	0	LN	LINC00511
0	-0.396726	0.05	0.155	0	LN	AL365295.1
0	-0.397303	0.666	0.758	0	LN	AFF1
0	-0.401761	0.33	0.433	0	LN	EEPD1
0	-0.408893	0.077	0.161	0	LN	CNTN4
0	-0.416603	0.379	0.483	0	LN	KCNMA1
0	-0.418698	0.106	0.213	0	LN	CTNNA2
0	-0.424674	0.028	0.136	0	LN	LINC02232
0	-0.426108	0.19	0.319	0	LN	ZNF385B
0	-0.430673	0.111	0.28	0	LN	TNIK
0	-0.430962	0.462	0.464	0	LN	COBLL1
0	-0.445118	0.229	0.342	0	LN	FRMD4A
0	-0.451997	0.17	0.313	0	LN	PRELID2
0	-0.465748	0.265	0.376	0	LN	ACSL1
0	-0.466409	0.097	0.145	0	LN	SKIL
0	-0.467708	0.233	0.416	0	LN	PGK1
0	-0.469681	0.27	0.407	0	LN	PTPRM
0	-0.472701	0.054	0.153	0	LN	AC093865.1
0	-0.476239	0.36	0.522	0	LN	NEBL
0	-0.476726	0.03	0.141	0	LN	CHL1
0	-0.480168	0.229	0.316	0	LN	DLGAP1
0	-0.481238	0.562	0.609	0	LN	FAM160A1
0	-0.481834	0.662	0.773	0	LN	NFIB
0	-0.482124	0.137	0.256	0	LN	IL1RAPL1
0	-0.483999	0.247	0.366	0	LN	CEP112
0	-0.485571	0.376	0.457	0	LN	SYT1
0	-0.488658	0.53	0.625	0	LN	CTNND2
0	-0.489882	0.176	0.289	0	LN	KLHL29
0	-0.490302	0.181	0.221	0	LN	AL008633.1
0	-0.492606	0.02	0.119	0	LN	AL589693.1
0	-0.500014	0.01	0.122	0	LN	ZFPM2-AS1
0	-0.501539	0.279	0.367	0	LN	SPAG16
0	-0.5036	0.065	0.158	0	LN	PDK4
0	-0.508942	0.131	0.251	0	LN	SOX6
0	-0.510279	0.282	0.371	0	LN	MIR2052HG
0	-0.51066	0.191	0.287	0	LN	MIR924HG
0	-0.519135	0.326	0.492	0	LN	PRKCA
0	-0.523208	0.015	0.145	0	LN	SYN3
0	-0.534294	0.087	0.12	0	LN	UNC5D
0	-0.536858	0.067	0.219	0	LN	UST
0	-0.538127	0.127	0.156	0	LN	TAFA2
0	-0.551584	0.67	0.61	0	LN	AKT3
0	-0.568077	0.057	0.184	0	LN	AC073114.1
0	-0.568241	0.002	0.137	0	LN	AL157778.1
0	-0.568269	0.418	0.496	0	LN	CAMK1D
0	-0.568464	0.013	0.131	0	LN	NRG1
0	-0.568731	0.05	0.174	0	LN	LMO3
0	-0.586238	0.446	0.608	0	LN	MBOAT2
0	-0.587727	0.405	0.537	0	LN	CADM1
0	-0.593877	0.212	0.319	0	LN	AC019197.1
0	-0.594366	0.08	0.22	0	LN	SLC24A3
0	-0.595701	0.117	0.266	0	LN	KCTD16
0	-0.606457	0.369	0.473	0	LN	PRIM2
0	-0.609323	0.491	0.491	0	LN	AF117829.1
0	-0.611111	0.621	0.676	0	LN	UNC13B
0	-0.611724	0.203	0.34	0	LN	GNGT1
0	-0.618723	0.121	0.211	0	LN	NCAM1
0	-0.628277	0.013	0.155	0	LN	LINC02307
0	-0.641132	0.019	0.136	0	LN	LINC01470
0	-0.654101	0.067	0.187	0	LN	PLCL1
0	-0.666792	0.083	0.234	0	LN	NPNT
0	-0.676586	0.022	0.217	0	LN	AC009264.1
0	-0.682386	0.405	0.467	0	LN	KCNMB2-AS1
0	-0.689832	0.004	0.153	0	LN	AC016152.1
0	-0.717121	0.444	0.533	0	LN	LRMDA
0	-0.742135	0.014	0.22	0	LN	TRIM5
0	-0.747309	0.228	0.369	0	LN	GALNT17
0	-0.777605	0.076	0.212	0	LN	HS3ST4
0	-0.781111	0.119	0.239	0	LN	LINC01811
0	-0.819212	0.031	0.144	0	LN	P3H2
0	-0.87847	0.048	0.103	0	LN	AC097467.3
0	-0.905336	0.041	0.125	0	LN	PDE1A
0	-0.966618	0.381	0.517	0	LN	LARGE1
0	-0.981912	0.447	0.627	0	LN	AFF3
0	-1.05629	0.075	0.159	0	LN	LINC01006
0	-1.05871	0.289	0.285	0	LN	RHOBTB1
0	-1.12681	0.705	0.776	0	LN	CDKAL1
0	-1.25787	0.364	0.399	0	LN	LSAMP
0	-1.58923	0.137	0.176	0	LN	CLSTN2
0	-2.42316	0.003	0.11	0	LN	RSPO2
0	-2.69043	0.306	0.537	0	LN	CNTNAP2
9.88131291682493e-324	0.384151	0.275	0.235	1.64662198445971e-319	LN	SLC4A4
2.96439387504748e-323	-0.287242	0.154	0.201	4.93986595337912e-319	LN	GRAMD4
6.91691904177745e-323	0.415727	0.612	0.518	1.15263538912179e-318	LN	RIMS2
2.34503068357321e-313	-0.367266	0.282	0.349	0	LN	INPP4B
3.35967e-308	0.38908	0.382	0.409	5.59856e-304	LN	LINC02163
1.31769e-300	0.270811	0.318	0.272	2.19579e-296	LN	DNAH5
1.61241e-300	0.262656	0.166	0.166	2.68692e-296	LN	LINGO2
3.54851e-296	0.261912	0.534	0.453	5.91324e-292	LN	PDZRN3
1.64004e-295	-0.551915	0.448	0.539	2.73296e-291	LN	GPC6
3.63254e-291	-0.328431	0.149	0.154	6.05326e-287	LN	AC010983.1
6.19378e-281	0.457329	0.493	0.471	1.03213e-276	LN	KLK3
4.38012e-279	-0.298062	0.101	0.123	7.29902e-275	LN	DSCAM-AS1
3.86575e-276	0.255812	0.261	0.202	6.44189e-272	LN	CADPS
1.01336e-266	-0.323854	0.205	0.26	1.68866e-262	LN	ARLNC1
1.87351e-266	0.252188	0.493	0.413	3.12202e-262	LN	AMD1
1.08183e-263	-0.264669	0.199	0.203	1.80276e-259	LN	SHISA6
7.09584e-261	0.355221	0.479	0.443	1.18245e-256	LN	CNKSR3
9.3146e-257	0.2559	0.284	0.253	1.55218e-252	LN	PLXNA2
8.32107e-256	-0.396882	0.421	0.491	1.38662e-251	LN	ARHGAP6
3.72568e-255	0.310662	0.26	0.202	6.20847e-251	LN	ELMO1
1.60554e-253	-0.259439	0.529	0.56	2.67548e-249	LN	SORBS2
2.06286e-251	0.35393	0.343	0.291	3.43755e-247	LN	CATSPERB
2.30373e-235	-0.281227	0.538	0.612	3.83894e-231	LN	PRR16
4.38377e-235	0.354176	0.162	0.127	7.30511e-231	LN	XACT
2.10969e-223	0.256358	0.332	0.299	3.51559e-219	LN	BASP1
3.24906e-219	-0.274332	0.599	0.661	5.41423e-215	LN	NCOR1
1.1598e-199	0.391953	0.505	0.476	1.93268e-195	LN	AR
2.55564e-187	-0.389397	0.21	0.241	4.25872e-183	LN	GALNTL6
3.96294e-182	-0.314673	0.587	0.609	6.60385e-178	LN	SERINC5
3.37129e-181	0.268097	0.371	0.307	5.61793e-177	LN	GULP1
4.05041e-179	-0.411716	0.209	0.257	6.74961e-175	LN	CACNA1A
5.25202e-176	0.265016	0.175	0.144	8.75196e-172	LN	CNTNAP5
2.04943e-151	-0.421439	0.169	0.2	3.41516e-147	LN	CRISPLD1
2.92077e-141	0.31056	0.442	0.421	4.86717e-137	LN	NRXN3
4.17667e-119	-0.344485	0.395	0.445	6.96001e-115	LN	NAMPT
2.32261e-113	0.26122	0.189	0.148	3.8704e-109	LN	RORB
2.89587e-82	0.320416	0.246	0.227	4.82567e-78	LN	NCAM2
4.12358e-59	0.250805	0.802	0.794	6.87153e-55	LN	NSMCE2
1.57028e-52	-0.254936	0.371	0.396	2.61671e-48	LN	TMEFF2
0	2.6305	0.539	0.1	0	prostate	RBFOX1
0	2.04756	0.535	0.252	0	prostate	KCNB2
0	1.97854	0.581	0.139	0	prostate	PCDH9
0	1.94417	0.557	0.123	0	prostate	LINC02377
0	1.8951	0.497	0.102	0	prostate	CDH20
0	1.80791	0.491	0.094	0	prostate	PCDH15
0	1.76804	0.561	0.196	0	prostate	RALYL
0	1.75407	0.621	0.261	0	prostate	FOXP2
0	1.67699	0.534	0.143	0	prostate	AMPH
0	1.67393	0.536	0.169	0	prostate	LINC02484
0	1.63895	0.595	0.23	0	prostate	ADGRB3
0	1.60606	0.505	0.104	0	prostate	AC113137.1
0	1.55892	0.582	0.177	0	prostate	NRXN1
0	1.49345	0.526	0.21	0	prostate	ELMO1
0	1.48174	0.281	0.047	0	prostate	EBF1
0	1.45969	0.489	0.152	0	prostate	LINGO2
0	1.44827	0.504	0.123	0	prostate	HEPACAM2
0	1.40968	0.504	0.116	0	prostate	AC016687.3
0	1.40774	0.358	0.054	0	prostate	NNAT
0	1.40619	0.5	0.111	0	prostate	FAM135B
0	1.38554	0.381	0.075	0	prostate	LINC01088
0	1.32926	0.61	0.268	0	prostate	ROBO1
0	1.32617	0.644	0.306	0	prostate	PCED1B
0	1.32054	0.939	0.622	0	prostate	ANKS1B
0	1.31748	0.819	0.412	0	prostate	NRXN3
0	1.29228	0.873	0.379	0	prostate	LINC02163
0	1.27115	0.815	0.369	0	prostate	DACH1
0	1.26415	0.487	0.109	0	prostate	2001-03-01
0	1.26386	0.448	0.082	0	prostate	AC074237.1
0	1.20687	0.547	0.148	0	prostate	SLIT2
0	1.1866	0.492	0.156	0	prostate	KCNH7
0	1.16296	0.444	0.357	0	prostate	AP001636.3
0	1.16081	0.527	0.197	0	prostate	PALM2-AKAP2
0	1.1314	0.4	0.19	0	prostate	GLYATL2
0	1.1229	0.539	0.165	0	prostate	PLCL2
0	1.12193	0.403	0.075	0	prostate	VCAN
0	1.11944	0.512	0.232	0	prostate	THSD7A
0	1.10819	0.481	0.141	0	prostate	CNTNAP5
0	1.08681	0.497	0.148	0	prostate	CRYBG3
0	1.07713	0.482	0.087	0	prostate	KLB
0	1.0689	0.814	0.834	0	prostate	RALGAPA2
0	1.05416	0.591	0.354	0	prostate	CACNA2D1
0	1.04063	0.533	0.204	0	prostate	TMEM108
0	1.02681	0.637	0.201	0	prostate	NTN4
0	1.02303	0.51	0.179	0	prostate	PDE4B
0	1.01333	0.968	0.861	0	prostate	FGF13
0	0.989277	0.337	0.057	0	prostate	ZNF804A
0	0.981191	0.753	0.261	0	prostate	AC104041.1
0	0.975687	0.62	0.345	0	prostate	SYBU
0	0.97203	0.329	0.038	0	prostate	AL591501.1
0	0.968884	0.657	0.547	0	prostate	RIMS2
0	0.961473	0.446	0.18	0	prostate	TENM4
0	0.958615	0.677	0.24	0	prostate	CRIM1
0	0.941131	0.437	0.093	0	prostate	DPP10
0	0.93719	0.68	0.208	0	prostate	AC097515.1
0	0.936146	0.444	0.118	0	prostate	MYT1L
0	0.933569	0.534	0.144	0	prostate	GRIK2
0	0.923741	0.973	0.824	0	prostate	ZBTB20
0	0.916657	0.328	0.086	0	prostate	SORCS3
0	0.912868	0.438	0.134	0	prostate	FAT3
0	0.912766	0.61	0.258	0	prostate	ZNF385B
0	0.904277	0.37	0.156	0	prostate	HPGD
0	0.89698	0.413	0.092	0	prostate	AC021504.1
0	0.896255	0.879	0.534	0	prostate	ARHGAP5
0	0.893436	0.43	0.363	0	prostate	TMC5
0	0.891447	0.345	0.044	0	prostate	CASR
0	0.889278	0.565	0.187	0	prostate	PIP5K1B
0	0.886926	0.62	0.397	0	prostate	MAP2
0	0.884413	0.383	0.062	0	prostate	AC105031.2
0	0.874935	0.398	0.08	0	prostate	SNCAIP
0	0.87269	0.332	0.075	0	prostate	FIGN
0	0.871939	0.525	0.155	0	prostate	AC068633.1
0	0.84144	0.595	0.255	0	prostate	SLC36A4
0	0.841066	0.427	0.277	0	prostate	CEMIP2
0	0.840903	0.383	0.073	0	prostate	HS3ST5
0	0.838297	0.508	0.262	0	prostate	AC092691.1
0	0.8347	0.845	0.845	0	prostate	TPD52
0	0.828137	0.364	0.065	0	prostate	GUCY2C
0	0.826569	0.397	0.276	0	prostate	TNFAIP8
0	0.826415	0.475	0.151	0	prostate	SLCO3A1
0	0.823512	0.538	0.525	0	prostate	DOCK4
0	0.819926	0.616	0.449	0	prostate	CNKSR3
0	0.8117	0.709	0.595	0	prostate	EXT1
0	0.80322	0.409	0.144	0	prostate	FGF12
0	0.798219	0.869	0.536	0	prostate	ITPR2
0	0.795563	0.509	0.15	0	prostate	EPHA5
0	0.786701	0.499	0.159	0	prostate	AP000829.1
0	0.770099	0.576	0.447	0	prostate	TOX
0	0.769102	0.301	0.058	0	prostate	NDST3
0	0.767279	0.609	0.326	0	prostate	GPC5
0	0.76682	0.592	0.278	0	prostate	GABRB3
0	0.76607	0.693	0.446	0	prostate	CHD7
0	0.763075	0.348	0.225	0	prostate	RNF144B
0	0.759585	0.692	0.389	0	prostate	ARHGEF7
0	0.747092	0.284	0.045	0	prostate	AJ009632.2
0	0.727548	0.936	0.718	0	prostate	MAP3K5
0	0.722638	0.551	0.222	0	prostate	LINC02315
0	0.721887	0.357	0.067	0	prostate	AP001025.1
0	0.720909	0.498	0.215	0	prostate	SDK2
0	0.719207	0.345	0.055	0	prostate	AL162464.2
0	0.718345	0.608	0.49	0	prostate	SERGEF
0	0.716698	0.38	0.178	0	prostate	AC130456.2
0	0.713822	0.369	0.118	0	prostate	ANO5
0	0.713762	0.322	0.071	0	prostate	NDST4
0	0.7088	0.287	0.113	0	prostate	CNTN5
0	0.706804	0.782	0.419	0	prostate	EPHA6
0	0.703768	0.491	0.201	0	prostate	IL1RAPL1
0	0.7008	0.437	0.158	0	prostate	AL139023.1
0	0.700782	0.436	0.182	0	prostate	KCNN2
0	0.699489	0.463	0.101	0	prostate	AC093916.1
0	0.698433	0.39	0.105	0	prostate	SRRM4
0	0.695278	0.429	0.118	0	prostate	UNC79
0	0.694454	0.321	0.089	0	prostate	CDH7
0	0.692764	0.386	0.151	0	prostate	KCNJ6
0	0.689004	0.486	0.437	0	prostate	WWC1
0	0.686005	0.318	0.131	0	prostate	TENM2
0	0.683849	0.324	0.093	0	prostate	AC011246.1
0	0.683518	0.497	0.206	0	prostate	WASF3
0	0.683396	0.451	0.112	0	prostate	LINC01446
0	0.678726	0.417	0.258	0	prostate	ASRGL1
0	0.677017	0.551	0.277	0	prostate	DST
0	0.675877	0.342	0.09	0	prostate	PLCXD3
0	0.673243	0.57	0.295	0	prostate	MIER1
0	0.673122	0.503	0.181	0	prostate	SCNN1A
0	0.66511	0.722	0.454	0	prostate	FUT8
0	0.65661	0.306	0.194	0	prostate	RUNX1
0	0.655515	0.348	0.178	0	prostate	C2orf27A
0	0.653493	0.815	0.613	0	prostate	CDK14
0	0.646912	0.482	0.16	0	prostate	CASC9
0	0.646566	0.508	0.453	0	prostate	TC2N
0	0.645584	0.352	0.091	0	prostate	CDH2
0	0.645504	0.627	0.344	0	prostate	APP
0	0.643833	0.294	0.063	0	prostate	LINC00616
0	0.64036	0.816	0.678	0	prostate	WWOX
0	0.627802	0.696	0.573	0	prostate	BAIAP2L1
0	0.627514	0.822	0.513	0	prostate	SAMD12
0	0.625728	0.336	0.101	0	prostate	BACH2
0	0.623482	0.335	0.119	0	prostate	CACNA2D3
0	0.622471	0.632	0.398	0	prostate	XKR6
0	0.619776	0.425	0.471	0	prostate	BACE2
0	0.619416	0.691	0.471	0	prostate	FAAH2
0	0.619254	0.351	0.083	0	prostate	ST3GAL6
0	0.616291	0.438	0.221	0	prostate	GALNTL6
0	0.614169	0.544	0.699	0	prostate	PLPP1
0	0.613227	0.445	0.148	0	prostate	MAN1A1
0	0.602739	0.395	0.142	0	prostate	JAM3
0	0.600354	0.347	0.152	0	prostate	GRIN3A
0	0.599407	0.369	0.152	0	prostate	PRKG1
0	0.593979	0.802	0.599	0	prostate	PPP2R5E
0	0.592433	0.67	0.437	0	prostate	THRB
0	0.590666	0.457	0.171	0	prostate	STS
0	0.588766	0.916	0.858	0	prostate	TBC1D5
0	0.586402	0.483	0.589	0	prostate	PRR16
0	0.582536	0.406	0.169	0	prostate	AC022034.3
0	0.577868	0.854	0.584	0	prostate	TEAD1
0	0.573488	0.364	0.134	0	prostate	MIR4713HG
0	0.573064	0.484	0.209	0	prostate	STXBP1
0	0.571025	0.473	0.251	0	prostate	AC116049.2
0	0.569424	0.34	0.207	0	prostate	CDC14B
0	0.567254	0.347	0.109	0	prostate	CMTM7
0	0.562756	0.394	0.174	0	prostate	ADGRL3
0	0.562604	0.433	0.188	0	prostate	AL110292.1
0	0.561009	0.261	0.054	0	prostate	TSHR
0	0.559392	0.344	0.137	0	prostate	2011-03-01
0	0.550488	0.432	0.209	0	prostate	STIM2
0	0.548983	0.513	0.703	0	prostate	GRHL2
0	0.548329	0.527	0.604	0	prostate	SERINC5
0	0.547344	0.338	0.093	0	prostate	POU6F2
0	0.544768	0.608	0.35	0	prostate	PHTF2
0	0.54264	0.472	0.198	0	prostate	ZFHX4
0	0.542345	0.929	0.91	0	prostate	TBL1XR1
0	0.540735	0.508	0.249	0	prostate	TBC1D1
0	0.538686	0.844	0.669	0	prostate	MYO1D
0	0.537797	0.34	0.085	0	prostate	HOXB3
0	0.535915	0.397	0.168	0	prostate	JAKMIP2
0	0.53515	0.349	0.144	0	prostate	AC069228.1
0	0.533724	0.467	0.192	0	prostate	MCC
0	0.532032	0.479	0.223	0	prostate	LINC01572
0	0.528466	0.274	0.048	0	prostate	ESR1
0	0.520395	0.257	0.081	0	prostate	LRRC9
0	0.520143	0.577	0.325	0	prostate	GPR137C
0	0.51551	0.316	0.109	0	prostate	LINC02438
0	0.515445	0.333	0.168	0	prostate	GLYATL1
0	0.513125	0.757	0.444	0	prostate	AGBL4
0	0.5053	0.265	0.091	0	prostate	LINC01194
0	0.502889	0.614	0.394	0	prostate	RAP1B
0	0.4921	0.436	0.197	0	prostate	MAP3K20
0	0.491876	0.314	0.084	0	prostate	ELAVL4
0	0.491128	0.814	0.596	0	prostate	SETBP1
0	0.489432	0.381	0.186	0	prostate	LINC02646
0	0.48756	0.89	0.731	0	prostate	FNIP1
0	0.486271	0.748	0.496	0	prostate	TNKS
0	0.485116	0.577	0.377	0	prostate	CDC42SE2
0	0.484193	0.446	0.204	0	prostate	CDON
0	0.48415	0.202	0.056	0	prostate	SGIP1
0	0.483683	0.215	0.054	0	prostate	FGF14
0	0.481392	0.324	0.101	0	prostate	AC114316.1
0	0.481024	0.316	0.103	0	prostate	SCGN
0	0.480721	0.31	0.072	0	prostate	AC106799.2
0	0.47718	0.283	0.082	0	prostate	BRINP3
0	0.476285	0.357	0.154	0	prostate	SH3RF3
0	0.475249	0.459	0.584	0	prostate	UTRN
0	0.474596	0.486	0.443	0	prostate	RNF24
0	0.474142	0.605	0.383	0	prostate	TUSC3
0	0.472001	0.667	0.513	0	prostate	COBL
0	0.471615	0.939	0.846	0	prostate	MAGI1
0	0.47035	0.314	0.075	0	prostate	LINC00648
0	0.467428	0.369	0.223	0	prostate	SOD2
0	0.466489	0.317	0.106	0	prostate	AC060765.2
0	0.465314	0.551	0.284	0	prostate	SUSD6
0	0.463512	0.307	0.055	0	prostate	AC022182.1
0	0.462484	0.344	0.118	0	prostate	AC009315.1
0	0.461593	0.296	0.072	0	prostate	HDAC2-AS2
0	0.460302	0.302	0.114	0	prostate	CSMD2
0	0.457732	0.268	0.039	0	prostate	PRDM6
0	0.45567	0.645	0.388	0	prostate	FBXO34
0	0.454216	0.445	0.228	0	prostate	CEP128
0	0.453019	0.387	0.157	0	prostate	AC104170.1
0	0.446772	0.217	0.045	0	prostate	AC006369.1
0	0.445738	0.722	0.499	0	prostate	FAM49B
0	0.441863	0.31	0.08	0	prostate	PAX9
0	0.439709	0.712	0.488	0	prostate	INSR
0	0.439556	0.212	0.018	0	prostate	LRRC53
0	0.438657	0.273	0.04	0	prostate	AMIGO2
0	0.436874	0.281	0.092	0	prostate	AC084816.1
0	0.434584	0.457	0.226	0	prostate	EPS8
0	0.43322	0.506	0.271	0	prostate	TBC1D19
0	0.428551	0.278	0.076	0	prostate	SYNE1
0	0.428513	0.383	0.16	0	prostate	CORO1C
0	0.427763	0.335	0.12	0	prostate	UNC80
0	0.427407	0.63	0.327	0	prostate	MIR2052HG
0	0.427247	0.618	0.379	0	prostate	FER
0	0.426346	0.607	0.337	0	prostate	PAPOLA
0	0.425838	0.472	0.241	0	prostate	ARHGEF28
0	0.421916	0.282	0.067	0	prostate	LINC01339
0	0.421578	0.663	0.46	0	prostate	UBE2D2
0	0.420619	0.255	0.06	0	prostate	ZNF536
0	0.419888	0.604	0.371	0	prostate	EVL
0	0.419151	0.289	0.056	0	prostate	AC011632.1
0	0.417797	0.323	0.167	0	prostate	LNX1
0	0.416128	0.228	0.043	0	prostate	LINC01087
0	0.415158	0.502	0.229	0	prostate	SIPA1L2
0	0.414014	0.303	0.102	0	prostate	GPR158
0	0.412587	0.383	0.172	0	prostate	MAGI2
0	0.411896	0.15	0.022	0	prostate	AC004852.2
0	0.410963	0.371	0.161	0	prostate	CCND3
0	0.40993	0.455	0.237	0	prostate	VPS50
0	0.408289	0.263	0.081	0	prostate	LINC00351
0	0.403021	0.413	0.189	0	prostate	WLS
0	0.401873	0.212	0.032	0	prostate	LMX1A
0	0.400936	0.566	0.644	0	prostate	RBM47
0	0.398439	0.577	0.338	0	prostate	ZBTB1
0	0.398059	0.412	0.215	0	prostate	POC1B
0	0.396942	0.267	0.064	0	prostate	AC106798.1
0	0.395471	0.441	0.2	0	prostate	ZNF420
0	0.393024	0.5	0.283	0	prostate	FARP2
0	0.393004	0.324	0.113	0	prostate	AC112493.1
0	0.392795	0.921	0.808	0	prostate	HNRNPC
0	0.383831	0.208	0.042	0	prostate	AL606923.2
0	0.381118	0.261	0.072	0	prostate	CDC42EP3
0	0.380312	0.265	0.064	0	prostate	ETV1
0	0.374811	0.603	0.374	0	prostate	UBE2B
0	0.374029	0.283	0.098	0	prostate	RNASEH2B
0	0.372413	0.246	0.053	0	prostate	SLCO1A2
0	0.367985	0.307	0.101	0	prostate	ZDHHC2
0	0.367943	0.391	0.168	0	prostate	DGLUCY
0	0.367243	0.265	0.083	0	prostate	IGF2BP2
0	0.365715	0.287	0.098	0	prostate	VWDE
0	0.362996	0.449	0.233	0	prostate	TENM1
0	0.356696	0.382	0.162	0	prostate	AC107419.1
0	0.356642	0.272	0.083	0	prostate	BCL11A
0	0.356242	0.299	0.095	0	prostate	LINC01687
0	0.354173	0.291	0.098	0	prostate	AP001347.1
0	0.353713	0.713	0.477	0	prostate	KAT6A
0	0.348644	0.545	0.305	0	prostate	FBXO32
0	0.347997	0.229	0.058	0	prostate	CAPN9
0	0.3469	0.662	0.428	0	prostate	RB1CC1
0	0.344163	0.358	0.196	0	prostate	ARHGEF10L
0	0.343533	0.202	0.017	0	prostate	LGI1
0	0.340073	0.209	0.02	0	prostate	AL138899.1
0	0.336408	0.388	0.435	0	prostate	ETV6
0	0.333185	0.278	0.099	0	prostate	HOXD3
0	0.331663	0.237	0.059	0	prostate	LINC02113
0	0.331037	0.277	0.099	0	prostate	PLEKHH2
0	0.324279	0.209	0.044	0	prostate	PAX3
0	0.323173	0.185	0.025	0	prostate	GRAMD1B
0	0.314812	0.362	0.162	0	prostate	NR1D2
0	0.314206	0.622	0.366	0	prostate	CPE
0	0.31269	0.37	0.162	0	prostate	FNTA
0	0.311951	0.206	0.038	0	prostate	LINC01611
0	0.310894	0.316	0.129	0	prostate	ANTXR1
0	0.306658	0.195	0.022	0	prostate	AC018685.2
0	0.305119	0.143	0.024	0	prostate	ZNF385D
0	0.303672	0.25	0.084	0	prostate	TMEM63C
0	0.302428	0.681	0.417	0	prostate	SYT1
0	0.301693	0.19	0.036	0	prostate	LINC01256
0	0.301587	0.209	0.05	0	prostate	AC016687.2
0	0.294678	0.212	0.048	0	prostate	PCDH9-AS2
0	0.284331	0.197	0.033	0	prostate	LINC00261
0	0.267902	0.192	0.033	0	prostate	GJB7
0	0.266388	0.148	0.028	0	prostate	NYAP2
0	0.263602	0.198	0.059	0	prostate	AC012464.1
0	0.261467	0.188	0.05	0	prostate	LINC01807
0	0.258874	0.21	0.061	0	prostate	CNTNAP3B
0	0.252246	0.237	0.079	0	prostate	NAB1
0	0.251395	0.184	0.042	0	prostate	AC006460.2
0	0.250607	0.152	0.027	0	prostate	PLUT
0	-0.340556	0.42	0.747	0	prostate	NFIB
0	-0.379609	0.359	0.604	0	prostate	RFX3
0	-0.418819	0.818	0.941	0	prostate	TRIO
0	-0.421885	0.008	0.139	0	prostate	DNAH8
0	-0.455055	0.444	0.636	0	prostate	WAC
0	-0.462873	0.006	0.147	0	prostate	AL137139.2
0	-0.466062	0.454	0.688	0	prostate	KDM4C
0	-0.473621	0.392	0.594	0	prostate	2006-03-01
0	-0.481703	0.555	0.758	0	prostate	FNDC3B
0	-0.498178	0.52	0.726	0	prostate	ACACA
0	-0.510593	0.016	0.152	0	prostate	AC009264.1
0	-0.533381	0.601	0.775	0	prostate	TMCC1
0	-0.534357	0.018	0.151	0	prostate	TRIM5
0	-0.539437	0.073	0.249	0	prostate	DAPK1
0	-0.539622	0.004	0.135	0	prostate	LMO3
0	-0.56713	0.21	0.464	0	prostate	PIK3CB
0	-0.569525	0.337	0.596	0	prostate	CCNY
0	-0.577905	0.859	0.946	0	prostate	JMJD1C
0	-0.579324	0.001	0.155	0	prostate	MIR548XHG
0	-0.585994	0.759	0.906	0	prostate	PARD3
0	-0.591101	0.182	0.385	0	prostate	MAPK10
0	-0.603017	0.227	0.511	0	prostate	SVIL
0	-0.619172	0.352	0.578	0	prostate	PLCB4
0	-0.622472	0.6	0.814	0	prostate	BIRC6
0	-0.631698	0.001	0.122	0	prostate	CRISP3
0	-0.637629	0.354	0.623	0	prostate	PTPRJ
0	-0.653152	0.054	0.286	0	prostate	TBC1D4
0	-0.65414	0.788	0.625	0	prostate	AKT3
0	-0.674834	0.236	0.485	0	prostate	KIAA1324
0	-0.743027	0.467	0.774	0	prostate	ANK3
0	-0.773678	0.371	0.621	0	prostate	SHANK2
0	-0.785687	0.572	0.379	0	prostate	LSAMP
0	-0.811615	0.06	0.287	0	prostate	ERBB4
0	-0.830018	0.236	0.452	0	prostate	CHKA
0	-0.840978	0.548	0.853	0	prostate	PDE4D
0	-0.909521	0.057	0.255	0	prostate	LINC02197
0	-0.995607	0.001	0.231	0	prostate	AC009478.1
0	-1.01445	0.057	0.312	0	prostate	FRMD4A
0	-1.03558	0.401	0.412	0	prostate	MIR99AHG
0	-1.06716	0.578	0.448	0	prostate	CNTNAP2
0	-1.11937	0.433	0.555	0	prostate	MBOAT2
0	-1.15766	0.068	0.283	0	prostate	PTPRT
0	-1.26264	0.168	0.409	0	prostate	KLK2
0	-1.43502	0.332	0.579	0	prostate	PCAT1
0	-1.52981	0.272	0.574	0	prostate	AFF3
0	-1.63685	0.016	0.204	0	prostate	LINC01811
0	-1.71752	0.362	0.634	0	prostate	SDK1
0	-2.33875	0.174	0.5	0	prostate	AR
0	-2.51203	0.07	0.228	0	prostate	FP236383.3
0	-2.9878	0.008	0.272	0	prostate	SCHLAP1
4.94065645841247e-324	0.604037	0.422	0.468	8.23310992229853e-320	prostate	ARHGAP6
6.91691904177745e-323	0.409012	0.555	0.366	1.15263538912179e-318	prostate	PTPN3
1.04741916918344e-321	-0.562004	0.367	0.248	1.74541930352729e-317	prostate	KCNJ3
4.55380305771877e-320	0.323277	0.35	0.176	7.58845741538256e-316	prostate	ACTN1
6.1269080740773e-320	0.326626	0.458	0.245	1.02098796146424e-315	prostate	IP6K1
2.94171626190337e-319	0.619004	0.626	0.437	4.90207597883577e-315	prostate	TTLL5
1.60714613935699e-318	0.426156	0.236	0.082	2.67814832662449e-314	prostate	MMP16
2.14805414908045e-318	0.319093	0.173	0.044	3.57951743402766e-314	prostate	SPHKAP
1.04383373479157e-317	0.789609	0.214	0.083	1.73944453565668e-313	prostate	AC008415.1
5.15447225983189e-317	0.297005	0.252	0.093	8.58941257378386e-313	prostate	RET
1.05610024842683e-316	0.621429	0.35	0.213	1.75988545397846e-312	prostate	RTN1
5.80854173601997e-314	0.638077	0.246	0.099	9.67935394890368e-310	prostate	NRG3
1.50107934924372e-313	0.674001	0.35	0.16	0	prostate	KCND2
1.43052002272122e-312	0.2567	0.163	0.042	2.38382e-308	prostate	RCAN2
1.31190178332471e-311	-0.386397	0.921	0.789	2.18615e-307	prostate	PVT1
6.90327469561789e-310	0.360613	0.308	0.136	1.15036e-305	prostate	TGFBR3
0	-2.0092	0.278	0.449	5.16584e-305	prostate	TRPS1
0	0.281957	0.225	0.08	6.14792e-305	prostate	MEST
0	-0.66679	0.205	0.405	1.9392e-304	prostate	NCALD
0	-0.728735	0.127	0.327	2.64283e-304	prostate	GALNT17
9.52103e-308	0.355016	0.359	0.166	1.58658e-303	prostate	ERC2
1.31988e-307	-0.571572	0.074	0.241	2.19944e-303	prostate	EPHA4
2.12929e-307	-0.48898	0.228	0.445	3.54825e-303	prostate	NRIP1
4.70378e-307	-0.455748	0.143	0.325	7.83839e-303	prostate	WNK2
1.48774e-305	0.370141	0.623	0.407	2.47916e-301	prostate	DCAF5
5.2195e-305	0.538497	0.398	0.198	8.69777e-301	prostate	AC024230.1
6.76405e-304	0.327168	0.322	0.142	1.12716e-299	prostate	AL583808.1
1.33353e-303	0.419504	0.579	0.357	2.22219e-299	prostate	PELI2
3.21072e-303	0.293624	0.28	0.112	5.35034e-299	prostate	SLAIN1
6.51578e-302	0.534547	0.686	0.474	1.08579e-297	prostate	PDZRN3
1.5503e-301	0.364298	0.24	0.102	2.58343e-297	prostate	AC098829.1
3.69462e-301	0.350318	0.602	0.389	6.15672e-297	prostate	SCAF11
9.03286e-301	1.0498	0.655	0.5	1.50524e-296	prostate	GPC6
1.51519e-300	0.282799	0.231	0.091	2.52492e-296	prostate	PLSCR1
6.5801e-300	0.351463	0.459	0.267	1.09651e-295	prostate	WTAP
3.76086e-299	0.349331	0.518	0.3	6.2671e-295	prostate	RYBP
6.86332e-299	-0.676739	0.151	0.346	1.1437e-294	prostate	OPHN1
2.54091e-298	0.430858	0.453	0.244	4.23418e-294	prostate	MIR924HG
5.39501e-297	0.275762	0.258	0.116	8.99024e-293	prostate	AC016831.7
1.28056e-296	-0.535874	0.016	0.132	2.13392e-292	prostate	LINC01500
1.68005e-296	-0.413239	0.278	0.48	2.79964e-292	prostate	USP3
1.24411e-295	0.438082	0.418	0.222	2.07318e-291	prostate	AC104123.1
8.76284e-295	0.352044	0.585	0.365	1.46024e-290	prostate	RAB28
1.49099e-293	-1.09892	0.08	0.23	2.48459e-289	prostate	ERG
6.83471e-293	-0.352791	0.001	0.103	1.13894e-288	prostate	ADAM2
2.01118e-292	0.54065	0.614	0.457	3.35143e-288	prostate	PPM1B
3.60199e-292	0.289279	0.396	0.197	6.00236e-288	prostate	SCN8A
3.97592e-292	-0.369904	0.139	0.333	6.62548e-288	prostate	RIC1
4.93089e-291	0.35151	0.579	0.364	8.21683e-287	prostate	PCM1
3.50368e-290	0.424607	0.429	0.227	5.83853e-286	prostate	GDAP1
6.82023e-290	0.50288	0.326	0.166	1.13652e-285	prostate	SLC9A9
1.31228e-289	-0.433493	0.131	0.325	2.18679e-285	prostate	GREB1L
1.37586e-289	-0.33108	0.038	0.184	2.29274e-285	prostate	PTPN14
2.49585e-288	0.792484	0.319	0.145	4.15908e-284	prostate	AC010983.1
2.99221e-286	0.330459	0.892	0.758	4.98622e-282	prostate	MNAT1
3.12681e-286	-0.388947	0.023	0.151	5.21052e-282	prostate	LAMA3
7.89369e-286	0.312538	0.356	0.172	1.3154e-281	prostate	SCGB2B2
1.13502e-285	0.372339	0.615	0.419	1.8914e-281	prostate	ATP9A
2.34489e-285	0.335625	0.363	0.175	3.90753e-281	prostate	JPH1
5.30372e-285	0.357136	0.341	0.168	8.83811e-281	prostate	RGS7
8.61594e-284	0.308233	0.181	0.058	1.43576e-279	prostate	DMD
9.62868e-282	0.665169	0.533	0.331	1.60452e-277	prostate	FSTL4
1.53982e-281	0.35386	0.375	0.184	2.56596e-277	prostate	RFC3
8.43118e-281	-0.329281	0.009	0.12	1.40497e-276	prostate	LINC00861
2.97229e-280	0.366465	0.367	0.214	4.95302e-276	prostate	ITGAV
1.48314e-279	0.393769	0.471	0.306	2.4715e-275	prostate	TMEM181
8.78113e-279	-0.30263	0.006	0.112	1.46329e-274	prostate	C22orf34
9.50864e-279	0.351518	0.234	0.096	1.58452e-274	prostate	OSMR
4.43819e-278	0.277815	0.269	0.116	7.3958e-274	prostate	SPTBN4
1.02494e-277	-0.485979	0.018	0.135	1.70796e-273	prostate	CNTN4
3.96755e-277	0.352466	0.186	0.062	6.61153e-273	prostate	NAV3
1.15865e-276	0.317853	0.525	0.326	1.93078e-272	prostate	OCIAD1
7.46665e-276	-0.650424	0.198	0.363	1.24424e-271	prostate	MALT1
2.40081e-275	0.533178	0.314	0.182	4.0007e-271	prostate	STEAP2-AS1
7.23411e-275	-0.497568	0.004	0.104	1.20549e-270	prostate	AC016152.1
2.93405e-273	0.280282	0.263	0.105	4.8893e-269	prostate	HS3ST1
1.46636e-271	0.519699	0.381	0.196	2.44355e-267	prostate	SESN3
2.39121e-271	0.326514	0.312	0.156	3.98472e-267	prostate	APBA2
2.49428e-271	0.301862	0.374	0.189	4.15648e-267	prostate	C1GALT1
2.58851e-271	0.338667	0.385	0.222	4.31349e-267	prostate	ATG2B
3.55862e-270	0.338373	0.451	0.266	5.93009e-266	prostate	ZNF706
5.35952e-270	-0.346037	0.091	0.254	8.93111e-266	prostate	CCDC7
1.11243e-269	-0.402632	0.382	0.59	1.85375e-265	prostate	UTY
2.42016e-269	-0.432213	0.673	0.817	4.03295e-265	prostate	TCF12
2.64165e-269	-0.565677	0.042	0.175	4.40205e-265	prostate	SLC24A3
1.81026e-268	0.304292	0.222	0.08	3.01662e-264	prostate	LINC00535
3.41638e-268	-0.38496	0.387	0.6	5.69306e-264	prostate	CTNND2
3.91634e-268	0.487762	0.389	0.205	6.52619e-264	prostate	ADCY2
2.85801e-267	0.380507	0.249	0.099	4.7626e-263	prostate	SGO1-AS1
7.25026e-267	0.278786	0.346	0.17	1.20818e-262	prostate	SGCE
9.62002e-267	-0.343028	0.115	0.276	1.60308e-262	prostate	SNHG25
1.68385e-266	0.400994	0.555	0.38	2.80597e-262	prostate	USP25
2.14051e-266	-0.363858	0.093	0.263	3.56694e-262	prostate	SPATS2L
2.17629e-266	-0.487318	0.098	0.262	3.62657e-262	prostate	GALNT18
3.41991e-266	-0.467662	0.007	0.107	5.69894e-262	prostate	LINC02307
5.17655e-266	-0.262689	0.025	0.151	8.6262e-262	prostate	CAB39L
6.98072e-265	-0.6922	0.244	0.422	1.16327e-260	prostate	TMPRSS2
8.5595e-265	0.334577	0.619	0.413	1.42635e-260	prostate	PPP2R5C
2.90733e-264	-0.599204	0.494	0.661	4.84478e-260	prostate	ADK
9.05522e-264	0.290768	0.409	0.223	1.50896e-259	prostate	RFC1
1.00732e-263	0.385317	0.607	0.4	1.6786e-259	prostate	BBS9
2.13428e-262	-0.371523	0.446	0.655	3.55656e-258	prostate	SGMS1
4.87352e-260	0.488546	0.461	0.287	8.12123e-256	prostate	LINC01748
4.33834e-259	-0.509337	0.025	0.137	7.22941e-255	prostate	CSMD1
1.88933e-258	0.485017	0.267	0.13	3.14838e-254	prostate	SOCS2-AS1
5.65592e-258	0.410641	0.573	0.379	9.42503e-254	prostate	TXNDC16
7.9381e-258	0.474396	0.817	0.668	1.3228e-253	prostate	PRKD1
8.86882e-258	0.255064	0.189	0.065	1.4779e-253	prostate	SPTLC3
1.08902e-257	0.337471	0.771	0.612	1.81475e-253	prostate	PDS5A
4.13601e-257	0.29939	0.556	0.347	6.89225e-253	prostate	CCNH
1.16228e-256	-0.453985	0.041	0.169	1.93683e-252	prostate	UST
2.1095e-256	0.42214	0.471	0.275	3.51527e-252	prostate	SYTL2
1.20794e-255	0.318285	0.661	0.46	2.01292e-251	prostate	CREBBP
5.76078e-255	0.383348	0.381	0.199	9.59977e-251	prostate	NAV2
1.0367e-253	0.33332	0.358	0.207	1.72756e-249	prostate	RGL3
1.58448e-253	-0.815045	0.341	0.473	2.64038e-249	prostate	CAMK1D
2.53084e-253	-0.553791	0.121	0.271	4.21739e-249	prostate	ZNF532
1.05272e-252	0.321016	0.292	0.133	1.75425e-248	prostate	GRM8
1.4219e-252	0.307134	0.585	0.381	2.36945e-248	prostate	YLPM1
3.69796e-252	0.408169	0.419	0.416	6.16228e-248	prostate	HSD17B4
5.45872e-252	0.481942	0.735	0.751	9.09641e-248	prostate	CADPS2
6.48932e-252	0.317083	0.226	0.087	1.08138e-247	prostate	UGT2B15
2.61657e-251	0.263607	0.372	0.192	4.36025e-247	prostate	ATXN3
2.24925e-249	-0.681438	0.22	0.34	3.74815e-245	prostate	SPAG16
2.89194e-249	0.392901	0.886	0.884	4.81914e-245	prostate	MAML3
9.42063e-249	0.350467	0.37	0.199	1.56985e-244	prostate	PDE5A
5.27206e-248	0.266099	0.55	0.347	8.78536e-244	prostate	MT-CO2
1.57902e-247	-0.511285	0.122	0.29	2.63129e-243	prostate	NIBAN1
1.64376e-247	-0.603103	0.206	0.375	2.73915e-243	prostate	GRIP1
2.91321e-247	0.350934	0.368	0.329	4.85458e-243	prostate	PARP8
3.51721e-247	-0.289238	0.015	0.122	5.86108e-243	prostate	LINC02055
7.04405e-247	0.357424	0.448	0.255	1.17382e-242	prostate	KSR2
7.74184e-247	-0.352766	0.041	0.168	1.2901e-242	prostate	CASC19
1.30007e-245	0.279132	0.31	0.147	2.16644e-241	prostate	VRK1
2.11606e-245	-0.379404	0.179	0.332	3.5262e-241	prostate	COPB2
4.90688e-245	0.255343	0.212	0.078	8.17682e-241	prostate	SLIT1
1.12854e-244	0.267092	0.3	0.15	1.88059e-240	prostate	EXD2
4.55851e-244	0.253475	0.303	0.142	7.5963e-240	prostate	WDR19
4.66662e-244	0.363736	0.214	0.088	7.77646e-240	prostate	ADAMTS3
1.1882e-243	0.31544	0.454	0.267	1.98002e-239	prostate	IFT43
5.30104e-242	0.396907	0.405	0.222	8.83365e-238	prostate	ATP8A2
2.62192e-241	-0.285474	0.045	0.178	4.36916e-237	prostate	FAM198B-AS1
1.46547e-240	0.353094	0.286	0.137	2.44205e-236	prostate	ALPK1
3.0868e-240	-0.386755	0.036	0.156	5.14384e-236	prostate	EPHB1
5.18336e-240	0.375103	0.564	0.546	8.63756e-236	prostate	ARHGEF12
5.87398e-240	0.358708	0.469	0.277	9.78839e-236	prostate	DLGAP1
4.33251e-239	0.280858	0.297	0.138	7.21969e-235	prostate	FBXL2
2.08466e-237	0.28551	0.202	0.099	3.47388e-233	prostate	F5
5.5556e-237	0.390326	0.608	0.502	9.25786e-233	prostate	NEK7
1.26825e-236	0.270123	0.217	0.084	2.11341e-232	prostate	KIT
1.77532e-236	0.265237	0.706	0.506	2.95839e-232	prostate	NSD3
5.36558e-236	0.443062	0.629	0.469	8.94119e-232	prostate	RPS6KA5
1.63281e-235	0.354634	0.553	0.354	2.72092e-231	prostate	CARMIL1
1.17055e-234	0.306766	0.272	0.132	1.95061e-230	prostate	ETS2
9.0086e-234	0.594239	0.92	0.89	1.50119e-229	prostate	IMMP2L
8.15326e-233	-0.726328	0.357	0.469	1.35866e-228	prostate	TSC22D1
2.36452e-232	0.315344	0.618	0.423	3.94023e-228	prostate	RNF19A
3.80048e-232	0.372843	0.445	0.321	6.33313e-228	prostate	DIAPH1
6.90579e-232	0.296075	0.45	0.27	1.15078e-227	prostate	PCNX4
1.40491e-231	-0.405021	0.367	0.532	2.34113e-227	prostate	ZNF609
2.23657e-231	0.332934	0.403	0.227	3.72702e-227	prostate	FRY
6.04113e-231	0.312831	0.566	0.382	1.00669e-226	prostate	SEPTIN2
1.31692e-228	0.298857	0.239	0.1	2.19452e-224	prostate	TACR1
1.77309e-228	0.354666	0.3	0.142	2.95468e-224	prostate	AL354994.1
3.5999e-228	-0.348061	0.033	0.144	5.99887e-224	prostate	CASC8
2.24514e-227	-0.418622	0.05	0.175	3.7413e-223	prostate	AC104365.1
2.34112e-227	0.285484	0.446	0.266	3.90124e-223	prostate	KIAA0355
2.71778e-227	0.27109	0.274	0.124	4.52892e-223	prostate	LINC01967
1.40149e-226	-0.46218	0.464	0.593	2.33545e-222	prostate	MIRLET7BHG
4.93768e-226	-0.412529	0.534	0.694	8.22815e-222	prostate	ZFHX3
1.7892e-225	0.388688	0.668	0.509	2.98152e-221	prostate	COMMD10
2.34831e-225	0.314043	0.734	0.548	3.91323e-221	prostate	BAZ2B
3.35586e-225	-0.441003	0.602	0.729	5.59221e-221	prostate	DTNB
4.62602e-225	0.286491	0.495	0.311	7.70881e-221	prostate	ZNF586
9.05455e-225	0.291926	0.306	0.157	1.50885e-220	prostate	UTP23
9.65991e-225	0.320326	0.592	0.395	1.60973e-220	prostate	APBB2
1.34309e-223	-0.459666	0.195	0.354	2.23812e-219	prostate	ABCC5
3.14409e-223	-0.369905	0.537	0.693	5.23931e-219	prostate	TTC3
2.42532e-221	-0.552829	0.422	0.503	4.04156e-217	prostate	HSP90AA1
2.51086e-221	-0.746629	0.525	0.677	4.18411e-217	prostate	P4HA1
3.88646e-221	-0.520669	0.639	0.799	6.4764e-217	prostate	LPP
1.95707e-220	0.251563	0.187	0.068	3.26126e-216	prostate	SPC25
7.47054e-219	0.292612	0.467	0.284	1.24489e-214	prostate	LIN52
8.31013e-219	0.301987	0.574	0.66	1.3848e-214	prostate	UNC13B
1.5879e-218	-0.493591	0.13	0.291	2.64608e-214	prostate	FRAS1
2.32361e-218	0.349313	0.218	0.088	3.87207e-214	prostate	TMTC1
2.37845e-218	-0.272922	0.013	0.107	3.96345e-214	prostate	AC016074.2
1.70911e-217	-0.637374	0.08	0.183	2.84807e-213	prostate	NCAM1
2.8141e-217	-0.309023	0.58	0.754	4.68942e-213	prostate	ALCAM
9.07209e-217	0.532391	0.342	0.209	1.51177e-212	prostate	LINC01619
2.29364e-216	0.285471	0.566	0.379	3.82213e-212	prostate	ZNF721
[truncated: 9,489 more rows]

## Sheet: S5
Supplementary Table S5: Archetype module signatures
Signatures for each module generated from recurrent DEGs in the cell populations of each archetype in each sample. Only gene modules composed of more than 10 genes while exclusively representing only one module were retained. Small modules that recapitulated similar signatures of other modules or only found in sample-specific subpopulations were excluded.
Module1	Module2	Module3	Module4	Module5	Module6
AR	Inflammation	NE3	NE4	Cycling	Glycolysis
AC010983.1	ABCC4	AC006369.1	AC004852.2	AC011447.3	ABTB2
ACACA	ABCC5	AC016687.3	AC019197.1	AC079142.1	AMD1
AFF3	AC027117.2	AC060765.1	AC068587.4	ANKRD37	ANKRD12
AL121790.1	AC083837.1	AC060765.2	AC069228.1	ANLN	ATP2C1
AR	AC130456.2	AC068051.1	AC074237.1	AP001347.1	DTNA
ARLNC1	ADAMTS3	AC068633.1	AC093916.1	ARHGAP11B	ENO1
BMPR1B	AFF1	AC073050.1	AC104041.1	ASPM	GBE1
COLEC12	AL078604.4	AC084816.1	ACPP	ATAD2	KDM3A
CPNE4	ALCAM	AC092691.1	ADGRL3	BRCA1	P4HA1
FOLH1	ALPK1	AC099517.1	AL136114.1	BRIP1	PGK1
GALNT7	AP000331.1	AC104170.1	AL157778.1	BUB1	PIAS2
GPC6	ARHGAP18	AC105031.2	AL591501.1	CCDC18	PLOD2
IL1RAPL1	ARHGAP26	AC116049.2	AMPH	CDC25C	PRELID2
KLK2	ARHGEF10L	AC132153.1	ANKS1B	CENPI	PTGES3
KLK3	ARHGEF12	ADCY2	ARHGEF7	CENPK	RAB1A
MYBPC1	ARHGEF3	AL031599.1	ARL15	CENPP
NFIA	ARHGEF38	AL354994.1	ASTN2	CEP128
PCAT1	ARID5B	ANK2	ATP8A1	CEP192
PDE4D	ASCC3	ANK3	AUTS2	CIT
PMEPA1	ASRGL1	ANKFN1	CACNA2D1	CKAP5
PPP3CA	ATG2B	AP000829.1	CADM2	CREB3L2
SLC4A4	ATP8A2	AP001025.1	CARMIL1	DEPDC1B
TMEFF2	B4GALT5	ARFGEF3	CBFA2T2	DIAPH3
UNC13B	BACE2	BRINP3	CBLB	DLEU2
ZBTB16	BAIAP2L1	BTBD11	CCDC26	DLG2
	BAZ2B	CACNA1D	CCDC50	DNA2
	BCL6	CACNA2D3	CHD7	E2F3
	BX284613.2	CACNB2	CMTM7	ECT2
	C5	CADM1	CNTNAP2	ERO1A
	CACNA1C	CADPS	CRYBG3	EZH2
	CASP10	CASR	CTNNA2	G2E3
	CATSPERB	CDH13	DACH1	GINS1
	CDC14B	CDH7	DNAH14	GPSM2
	CDK8	CDHR3	ELMO1	HERC3
	CEMIP2	CDK14	FAT4	HP1BP3
	CP	CHST11	FBXL7	KIF11
	CPEB4	CNTN5	FHIT	KIF14
	CRIM1	CPE	FIGN	KIF15
	CRTC3	CSMD2	FTX	KIF18B
	CSGALNACT1	CSMD3	FUT8	KIF4A
	CSNK1A1	DNER	GDAP1	KNL1
	CYTH3	DPP10	HDAC9	KNTC1
	DIAPH1	DRAIC	HEPACAM2	LAMTOR5-AS1
	DNAH5	ERC2	HS3ST5	LIFR
	DOCK4	ETV1	IMMP2L	LIN52
	EBF1	FGF14	JAKMIP2	LMNB1
	EGFR	FMN1	KALRN	MELK
	ELF2	FSTL5	KCNB2	MID1
	EPAS1	GABRG3	KCNMA1	MIS18BP1
	ERBB4	GLCCI1	KCTD16	MPHOSPH9
	ESRRG	GPC3	KIAA1211	MSI2
	ETS2	GRM8	LHFPL3	NCAPG2
	ETV6	IGFBP2	LHFPL6	NDC80
	FAAH2	IQSEC1	LINC01088	NEDD4L
	FAM135A	JAZF1	LINC02315	NIBAN1
	FAM160A1	KCNH7	LINC02377	NSD2
	FGF13	KLB	LPIN2	NT5DC3
	FKBP5	KSR2	LRMDA	NUCKS1
	FNBP1L	LINC01687	MACROD2	NUF2
	FNDC3B	LINC01811	MAGI1	NUSAP1
	FNIP2	LINC02113	MAML3	OSBPL3
	FSTL4	LINC02163	MAP3K5	PARPBP
	GALNTL6	LINC02248	2001-03-01	PHACTR4
	GLIS3	LINC02254	MCC	PITPNM2
	GMDS	LSAMP	MIER1	PKP4
	GRAMD2B	MAGI2	MLLT3	POLQ
	GRAMD4	MGAT4C	MT-CO2	PPM1E
	GRHL2	MIR646HG	MYRIP	PRR11
	GSKIP	MIR99AHG	NDST3	R3HDM1
	GUCY1A1	MMP16	NFASC	RACGAP1
	HIF1A	MRTFB	NFIB	RFC3
	HIVEP2	MTSS1	NPAS3	RGS3
	HSD17B4	NELL1	NRXN1	RRM2
	IDH2	NETO1	NRXN3	RTKN2
	IFNGR1	NFATC2	PCDH15	SEMA3C
	ITPR2	NHS	PCSK2	SESN3
	KAZN	NKAIN2	PLCB4	SKA2
	KCNN2	NOL4	PLCL2	SMC4
	KCNQ2	PBX1	PLCXD3	SPC25
	KITLG	PBX3	POC1B	STAG1
	KMO	PDE5A	POLA1	STIL
	LDLRAD4	PID1	PRIM2	TACC3
	LIMCH1	PLXNA2	PRUNE2	TBC1D31
	LINC00511	PRKCE	PVT1	TOP2A
	LINC01237	RASSF8	RAD51B	TPX2
	LINC01344	RGS7	RANBP17	TTC39C
	LPP	RMST	RBFOX1	VRK1
	LRIG1	ROBO2	RFX3	WSB1
	LRRIQ1	RUNX1T1	ROBO1	XPO1
	LTBP1	SAMD12	SAAL1	ZRANB3
	MACF1	SDK1	SDK2
	MAN1A1	SETBP1	SH3GL2
	MAPK4	SLC18A1	SIPA1L3
	MAST4	SLC44A5	SLAIN1
	MECOM	SLIT2	SLC12A2
	MGST1	SORCS3	SLC38A11
	MOSMO	SPOCK1	SLCO5A1
	MTUS1	SSBP2	SRGAP1
	MYO10	ST18	STXBP5L
	MYO9A	STAU2	SYBU
	NAALADL2	STIM2	SYTL2
	NAMPT	STXBP5	TNIK
	NBEA	SYT1	TSHR
	NCOA7	TMEM108	VPS13A
	NEBL	TMEM150C	WASF3
	NEK10	TMEM178B
	NFKB1	TP63
	NPAS2	TRAPPC9
	NRP1	TSHZ2
	NT5C2	XKR6
	NTN4	ZBTB7C
	OSMR	ZNF704
	OSMR-AS1
	PCCA
	PDZD8
	PELI2
	PHF14
	PIP5K1B
	PITPNC1
	PLPP1
	PLSCR1
	PLXNA4
	PPM1B
	PPP2R5E
	PRKD1
	PRR16
	PTPRK
	RALGAPA2
	RASEF
	RBM47
	RBMS3
	RFLNA
	RNF144B
	RNF24
	ROR1
	RORA
	RPS6KA5
	RUFY3
	RUNX1
	SEMA4B
	SERGEF
	SFMBT2
	SGPP1
	SHISA6
	SHROOM3
	SIDT1
	SIPA1L2
	SLC11A2
	SLC1A1
	SLC20A2
	SLC23A2
	SLC25A16
	SLC4A7
	SLC7A2
	SLC9A9
	SND1
	SOCS2-AS1
	SOD2
	SPATA6L
	SPINK1
	ST6GAL1
	STAT3
	STEAP4
	STK3
	STRN3
	SYNE2
	TANC1
	TAOK1
	TBC1D8
	TC2N
	TCF7L2
	TMC5
	TNFAIP8
	TNFRSF21
	TRIO
	TRPS1
	TTC39B
	TTLL5
	UTRN
	VAV3
	VPS13C
	VSTM2L
	WWC1
	XBP1
	XPR1
	YAP1
	ZBTB20
	ZHX2
	ZMYND8
	ZNF385B

## Sheet: S6
Supplementary Table S6: FOLH1 gene SNVs
Variants were written in the order of chromosome, postion, reference nucleotide, and altered nucleotide.
sample	IMPACT	consequence	variant	MAX_AF	AF	Existing_variation
CA34_liver_left_11	MODIFIER	intron_variant	chr11 49161719 A G	#NAME?	NA
CA34_liver_left_11	MODIFIER	intron_variant	chr11 49199403 A T	#NAME?	NA	rs1489026149
CA34_liver_right_8	MODIFIER	intron_variant	chr11 49161719 A G	#NAME?	NA
CA34_liver_right_8	MODIFIER	intron_variant	chr11 49199403 A T	#NAME?	NA	rs1489026149
CA34_paraaortic_lymph_node_2	MODIFIER	intron_variant	chr11 49161719 A G	#NAME?	NA
CA34_paraaortic_lymph_node_2	MODIFIER	intron_variant	chr11 49199403 A T	#NAME?	NA	rs1489026149
CA35_bladder_base_2	MODIFIER	intron_variant	chr11 49150867 G A	0.0507	0.0294	rs7946236
CA35_bladder_base_2	MODIFIER	intron_variant	chr11 49191455 C T	#NAME?	NA	rs867256722
CA35_bladder_base_2	MODIFIER	intron_variant	chr11 49196208 G A	#NAME?	NA	rs1328420655
CA35_bladder_base_2	MODIFIER	upstream_gene_variant	chr11 49210927 A G	#NAME?	NA	rs1173315905
CA35_left_paraaortic_lymph_node_track_1A	MODIFIER	intron_variant	chr11 49150867 G A	0.0507	0.0294	rs7946236
CA35_left_paraaortic_lymph_node_track_1A	MODIFIER	intron_variant	chr11 49191455 C T	#NAME?	NA	rs867256722
CA35_left_paraaortic_lymph_node_track_1A	MODIFIER	intron_variant	chr11 49196208 G A	#NAME?	NA	rs1328420655
CA35_left_paraaortic_lymph_node_track_1A	MODIFIER	upstream_gene_variant	chr11 49210927 A G	#NAME?	NA	rs1173315905
CA35_left_paraaortic_lymph_node_track_1B	MODIFIER	intron_variant	chr11 49150867 G A	0.0507	0.0294	rs7946236
CA35_left_paraaortic_lymph_node_track_1B	MODIFIER	intron_variant	chr11 49191455 C T	#NAME?	NA	rs867256722
CA35_left_paraaortic_lymph_node_track_1B	MODIFIER	intron_variant	chr11 49196208 G A	#NAME?	NA	rs1328420655
CA35_left_paraaortic_lymph_node_track_1B	MODIFIER	upstream_gene_variant	chr11 49210927 A G	#NAME?	NA	rs1173315905
CA46_hilar_lymph_node_5	MODIFIER	intron_variant	chr11 49166523 A G	#NAME?	NA	rs72906394
CA46_hilar_lymph_node_5	MODIFIER	intron_variant	chr11 49169365 C G	#NAME?	NA	rs74799577
CA46_hilar_lymph_node_5	MODERATE	missense_variant	chr11 49186715 G A	0.08204	NA	rs75111588
CA46_hilar_lymph_node_5	MODIFIER	non_coding_transcript_exon_variant	chr11 49186767 G A	0.01698	NA	rs79155991
CA46_hilar_lymph_node_5	MODIFIER	intron_variant	chr11 49186781 G A	0.01009	NA	rs74858499
CA46_hilar_lymph_node_5	MODIFIER	intron_variant	chr11 49199403 A T	#NAME?	NA	rs1489026149
CA46_liver_12	MODIFIER	intron_variant	chr11 49166523 A G	#NAME?	NA	rs72906394
CA46_liver_12	MODIFIER	intron_variant	chr11 49169365 C G	#NAME?	NA	rs74799577
CA46_liver_12	MODERATE	missense_variant	chr11 49186715 G A	0.08204	NA	rs75111588
CA46_liver_12	MODIFIER	non_coding_transcript_exon_variant	chr11 49186767 G A	0.01698	NA	rs79155991
CA46_liver_12	MODIFIER	intron_variant	chr11 49186781 G A	0.01009	NA	rs74858499
CA46_lung_7	MODIFIER	intron_variant	chr11 49166523 A G	#NAME?	NA	rs72906394
CA46_lung_7	MODERATE	missense_variant	chr11 49186715 G A	0.08204	NA	rs75111588
CA46_lung_7	MODIFIER	non_coding_transcript_exon_variant	chr11 49186767 G A	0.01698	NA	rs79155991
CA46_lung_7	MODIFIER	intron_variant	chr11 49186781 G A	0.01009	NA	rs74858499
CA46_paraaortic_lymph_node_15	MODIFIER	intron_variant	chr11 49166523 A G	#NAME?	NA	rs72906394
CA46_paraaortic_lymph_node_15	MODIFIER	intron_variant	chr11 49169365 C G	#NAME?	NA	rs74799577
CA46_paraaortic_lymph_node_15	MODERATE	missense_variant	chr11 49186715 G A	0.08204	NA	rs75111588
CA46_paraaortic_lymph_node_15	MODIFIER	non_coding_transcript_exon_variant	chr11 49186767 G A	0.01698	NA	rs79155991
CA46_paraaortic_lymph_node_15	MODIFIER	intron_variant	chr11 49186781 G A	0.01009	NA	rs74858499
CA46_pelvic_lymph_node_19	MODIFIER	intron_variant	chr11 49166523 A G	#NAME?	NA	rs72906394
CA46_pelvic_lymph_node_19	MODIFIER	intron_variant	chr11 49169365 C G	#NAME?	NA	rs74799577
CA46_pelvic_lymph_node_19	MODERATE	missense_variant	chr11 49186715 G A	0.08204	NA	rs75111588
CA46_pelvic_lymph_node_19	MODIFIER	non_coding_transcript_exon_variant	chr11 49186767 G A	0.01698	NA	rs79155991
CA46_pelvic_lymph_node_19	MODIFIER	intron_variant	chr11 49199403 A T	#NAME?	NA	rs1489026149
CA46_prostate_17	MODIFIER	intron_variant	chr11 49166523 A G	#NAME?	NA	rs72906394
CA46_prostate_17	MODERATE	missense_variant	chr11 49186715 G A	0.08204	NA	rs75111588
CA46_prostate_17	MODIFIER	non_coding_transcript_exon_variant	chr11 49186767 G A	0.01698	NA	rs79155991
CA46_prostate_17	MODIFIER	intron_variant	chr11 49186781 G A	0.01009	NA	rs74858499
CA46_prostate_17	MODIFIER	intron_variant	chr11 49199403 A T	#NAME?	NA	rs1489026149
CA76_left_rib_17	MODIFIER	intron_variant	chr11 49183617 G T	#NAME?	NA
CA76_left_rib_17	MODERATE	missense_variant	chr11 49186715 G A	0.08204	NA	rs75111588
CA76_liver_right_40	MODIFIER	intron_variant	chr11 49183617 G T	#NAME?	NA
CA76_liver_right_40	MODERATE	missense_variant	chr11 49186715 G A	0.08204	NA	rs75111588
CA76_vertebra_25	MODIFIER	intron_variant	chr11 49183617 G T	#NAME?	NA
CA76_vertebra_25	MODERATE	missense_variant	chr11 49186715 G A	0.08204	NA	rs75111588
CA83_hilar_lymph_node_47	MODIFIER	intron_variant	chr11 49159228 G A	#NAME?	NA	rs2733989
CA83_hilar_lymph_node_47	MODIFIER	intron_variant	chr11 49187993 T C	#NAME?	NA	rs1274551297
CA83_hilar_lymph_node_47	MODIFIER	intron_variant	chr11 49207415 T C	#NAME?	NA	rs144214231
CA83_hilar_lymph_node_47	MODIFIER	upstream_gene_variant	chr11 49209816 T A	#NAME?	NA	rs138317366
CA83_hilar_lymph_node_47	MODIFIER	upstream_gene_variant	chr11 49210927 A G	#NAME?	NA	rs1173315905
CA83_liver_49	MODIFIER	intron_variant	chr11 49207415 T C	#NAME?	NA	rs144214231
CA83_lung_55	MODIFIER	intron_variant	chr11 49159228 G A	#NAME?	NA	rs2733989
CA83_lung_55	MODIFIER	intron_variant	chr11 49167675 T C	#NAME?	NA	rs377324535
CA83_lung_55	MODIFIER	intron_variant	chr11 49186781 G A	0.01009	NA	rs74858499
CA83_lung_55	MODIFIER	intron_variant	chr11 49187993 T C	#NAME?	NA	rs1274551297
CA83_lung_55	MODIFIER	intron_variant	chr11 49191416 C T	#NAME?	NA	rs78735544
CA83_lung_55	MODIFIER	intron_variant	chr11 49191427 T C	#NAME?	NA	rs79863245
CA83_lung_55	MODIFIER	intron_variant	chr11 49191455 C T	#NAME?	NA	rs867256722
CA83_lung_55	MODIFIER	intron_variant	chr11 49207415 T C	#NAME?	NA	rs144214231
CA83_lung_55	MODIFIER	upstream_gene_variant	chr11 49209816 T A	#NAME?	NA	rs138317366
CA83_lung_55	MODIFIER	upstream_gene_variant	chr11 49210927 A G	#NAME?	NA	rs1173315905
CA83_paraaortic_lymph_node_12	MODIFIER	intron_variant	chr11 49186781 G A	0.01009	NA	rs74858499
CA83_paraaortic_lymph_node_12	MODIFIER	intron_variant	chr11 49207415 T C	#NAME?	NA	rs144214231
CA83_paraaortic_lymph_node_12	MODIFIER	upstream_gene_variant	chr11 49209816 T A	#NAME?	NA	rs138317366
CA83_perinephric_fat_19	MODIFIER	intron_variant	chr11 49159228 G A	#NAME?	NA	rs2733989
CA83_perinephric_fat_19	MODIFIER	intron_variant	chr11 49167675 T C	#NAME?	NA	rs377324535
CA83_perinephric_fat_19	MODIFIER	intron_variant	chr11 49186781 G A	0.01009	NA	rs74858499
CA83_perinephric_fat_19	MODIFIER	intron_variant	chr11 49187993 T C	#NAME?	NA	rs1274551297
CA83_perinephric_fat_19	MODIFIER	intron_variant	chr11 49191416 C T	#NAME?	NA	rs78735544
CA83_perinephric_fat_19	MODIFIER	intron_variant	chr11 49191427 T C	#NAME?	NA	rs79863245
CA83_perinephric_fat_19	MODIFIER	intron_variant	chr11 49191455 C T	#NAME?	NA	rs867256722
CA83_perinephric_fat_19	MODIFIER	intron_variant	chr11 49207415 T C	#NAME?	NA	rs144214231
CA83_perinephric_fat_19	MODIFIER	upstream_gene_variant	chr11 49209816 T A	#NAME?	NA	rs138317366
CA83_perinephric_fat_19	MODIFIER	upstream_gene_variant	chr11 49210927 A G	#NAME?	NA	rs1173315905

## Sheet: S7
Supplementary Table S7: DEGs between subclones within samples.
Differntial expression analysis was conducted through the FindMarkers() function of Seurat (v4.3) in a pairwise manner between subclones within individual sample. The comparision between subclones was recorded in the "comp" column with subclones IDs seperated by "|". Log2FC cutoff was 0.25 and adjusted p value cutoff was 0.05.
sample	gene	p_val	avg_log2FC	pct.1	pct.2	p_val_adj	comp
CA27_dura_base_skull_13	TENM1	2.51203e-41	0.624573	0.721	0.551	7.99681e-37	1|2
CA27_dura_base_skull_13	RIMS2	2.2524e-31	-0.58229	0.674	0.779	7.17029e-27	1|2
CA27_dura_base_skull_13	MIR2052HG	1.13897e-28	-0.643755	0.317	0.46	3.6258e-24	1|2
CA27_dura_base_skull_13	PDE3A	9.94434e-27	-0.730622	0.189	0.33	3.16568e-22	1|2
CA27_dura_base_skull_13	NCAM2	1.08728e-26	0.719271	0.679	0.556	3.46124e-22	1|2
CA27_dura_base_skull_13	CAMK2D	2.71979e-22	0.372089	0.966	0.952	8.65817e-18	1|2
CA27_dura_base_skull_13	BICD1	3.92928e-22	-0.364901	0.77	0.841	1.25085e-17	1|2
CA27_dura_base_skull_13	FBXL7	5.16841e-18	-0.409889	0.482	0.603	1.64531e-13	1|2
CA27_dura_base_skull_13	WNK1	1.30727e-17	-0.253738	0.792	0.848	4.16157e-13	1|2
CA27_dura_base_skull_13	EPHA5	1.903e-17	-0.403255	0.198	0.308	6.058e-13	1|2
CA27_dura_base_skull_13	CACNA1C	2.09281e-17	-0.553355	0.541	0.647	6.66224e-13	1|2
CA27_dura_base_skull_13	NRCAM	1.04529e-15	-0.291501	0.256	0.359	3.32757e-11	1|2
CA27_dura_base_skull_13	ETV6	1.39783e-14	-0.326993	0.765	0.821	4.44984e-10	1|2
CA27_dura_base_skull_13	ARHGAP10	1.91311e-14	-0.345784	0.445	0.555	6.0902e-10	1|2
CA27_dura_base_skull_13	DERA	2.3997e-14	-0.253527	0.531	0.627	7.6392e-10	1|2
CA27_dura_base_skull_13	SLC2A12	2.74695e-14	0.287633	0.706	0.615	8.74464e-10	1|2
CA27_dura_base_skull_13	RAP1B	4.34681e-14	-0.27586	0.874	0.9	1.38376e-09	1|2
CA27_dura_base_skull_13	KLK2	6.13759e-14	0.273378	0.76	0.679	1.95384e-09	1|2
CA27_dura_base_skull_13	TBPL1	2.25494e-13	0.349174	0.701	0.606	7.17836e-09	1|2
CA27_dura_base_skull_13	TBC1D14	4.08558e-13	0.306422	0.856	0.801	1.3006e-08	1|2
CA27_dura_base_skull_13	MIR99AHG	4.20138e-13	0.254863	0.966	0.963	1.33747e-08	1|2
CA27_dura_base_skull_13	AL110292.1	5.74093e-13	-0.255724	0.661	0.749	1.82757e-08	1|2
CA27_dura_base_skull_13	NAALADL2	1.59858e-12	0.308951	0.961	0.948	5.08893e-08	1|2
CA27_dura_base_skull_13	FGD6	1.62492e-12	-0.294366	0.368	0.467	5.17277e-08	1|2
CA27_dura_base_skull_13	BORCS5	2.62723e-12	-0.305215	0.684	0.707	8.36352e-08	1|2
CA27_dura_base_skull_13	AUTS2	3.86773e-12	-0.307977	0.831	0.885	1.23125e-07	1|2
CA27_dura_base_skull_13	DPP6	1.55254e-11	-0.370892	0.393	0.49	4.94236e-07	1|2
CA27_dura_base_skull_13	CDK19	1.68883e-11	0.27787	0.899	0.862	5.37622e-07	1|2
CA27_dura_base_skull_13	ANKH	3.46705e-11	0.282689	0.915	0.886	1.1037e-06	1|2
CA27_dura_base_skull_13	C2orf27A	3.55042e-11	0.260668	0.764	0.703	1.13024e-06	1|2
CA27_dura_base_skull_13	SEMA3C	5.21959e-11	0.350555	0.861	0.832	1.66161e-06	1|2
CA27_dura_base_skull_13	CACNA2D1	5.786e-11	-0.387085	0.41	0.507	1.84191e-06	1|2
CA27_dura_base_skull_13	ROBO1	6.36951e-11	-0.363414	0.52	0.617	2.02767e-06	1|2
CA27_dura_base_skull_13	ESYT2	9.14943e-11	0.250162	0.895	0.842	2.91263e-06	1|2
CA27_dura_base_skull_13	MBOAT2	1.36288e-10	0.301375	0.784	0.732	4.33859e-06	1|2
CA27_dura_base_skull_13	GLYATL2	1.72873e-10	0.253142	0.959	0.952	5.50325e-06	1|2
CA27_dura_base_skull_13	AMD1	3.81357e-10	0.271829	0.771	0.728	1.21401e-05	1|2
CA27_dura_base_skull_13	AC083837.1	5.83998e-10	-0.447264	0.423	0.491	1.8591e-05	1|2
CA27_dura_base_skull_13	GLIS3	1.18171e-09	-0.32196	0.413	0.495	3.76186e-05	1|2
CA27_dura_base_skull_13	P3H2	3.92678e-09	0.318651	0.675	0.613	0.000125005	1|2
CA27_dura_base_skull_13	HIF1A-AS3	4.94281e-09	0.413451	0.465	0.413	0.000157349	1|2
CA27_dura_base_skull_13	ANKRD37	6.56144e-09	0.505775	0.381	0.311	0.000208877	1|2
CA27_dura_base_skull_13	NEDD9	7.40808e-09	0.275467	0.731	0.679	0.000235829	1|2
CA27_dura_base_skull_13	NTN4	9.86795e-09	-0.400273	0.352	0.428	0.000314136	1|2
CA27_dura_base_skull_13	RELN	1.1808e-08	0.266332	0.875	0.83	0.000375895	1|2
CA27_dura_base_skull_13	AKAP6	1.61343e-08	-0.30157	0.357	0.405	0.000513618	1|2
CA27_dura_base_skull_13	LARGE1	3.07651e-08	0.407798	0.897	0.876	0.000979375	1|2
CA27_dura_base_skull_13	EBF1	3.15868e-08	-0.451683	0.262	0.337	0.00100553	1|2
CA27_dura_base_skull_13	VAV3	3.96827e-08	-0.270225	0.135	0.199	0.00126326	1|2
CA27_dura_base_skull_13	C1orf21	4.87269e-08	0.272219	0.931	0.917	0.00155117	1|2
CA27_dura_base_skull_13	PALM2-AKAP2	7.2183e-08	-0.259022	0.25	0.313	0.00229787	1|2
CA27_dura_base_skull_13	TGM4	8.06576e-08	0.356264	0.673	0.612	0.00256765	1|2
CA27_dura_base_skull_13	FAM162A	9.25943e-08	0.261106	0.681	0.635	0.00294765	1|2
CA27_dura_base_skull_13	RORB	9.8888e-08	-0.287381	0.472	0.552	0.003148	1|2
CA27_dura_base_skull_13	TDRP	1.4388e-07	0.252503	0.699	0.637	0.00458027	1|2
CA27_dura_base_skull_13	RFLNA	1.53061e-07	-0.273907	0.515	0.573	0.00487255	1|2
CA27_dura_base_skull_13	DENND5B	1.6269e-07	-0.255642	0.434	0.507	0.00517906	1|2
CA27_dura_base_skull_13	AC068587.4	2.17518e-07	-0.2935	0.526	0.593	0.00692447	1|2
CA27_dura_base_skull_13	PITPNC1	3.08822e-07	-0.367915	0.563	0.615	0.00983104	1|2
CA27_dura_base_skull_13	HDAC9	5.97998e-07	-0.294253	0.374	0.454	0.0190367	1|2
CA27_dura_base_skull_13	DIAPH3	8.72898e-07	0.367119	0.289	0.285	0.0277878	1|2
CA27_dura_base_skull_13	LINC01297	3.24948e-21	0.25901	0.399	0.543	1.03444e-16	1|3
CA27_dura_base_skull_13	EBF1	4.38912e-20	-0.561308	0.262	0.524	1.39723e-15	1|3
CA27_dura_base_skull_13	PDE3A	5.66205e-19	-0.302705	0.189	0.416	1.80246e-14	1|3
CA27_dura_base_skull_13	NMNAT2	4.03704e-18	-0.317632	0.172	0.375	1.28515e-13	1|3
CA27_dura_base_skull_13	PLD1	7.05937e-18	-0.282527	0.281	0.489	2.24728e-13	1|3
CA27_dura_base_skull_13	ERC2	2.0633e-17	-0.376411	0.326	0.571	6.56832e-13	1|3
CA27_dura_base_skull_13	CHST11	2.08811e-17	-0.328643	0.098	0.273	6.64729e-13	1|3
CA27_dura_base_skull_13	FGD6	2.15052e-17	-0.348841	0.368	0.61	6.84597e-13	1|3
CA27_dura_base_skull_13	MIR2052HG	4.58997e-17	-0.718652	0.317	0.571	1.46117e-12	1|3
CA27_dura_base_skull_13	ITGA1	5.1579e-17	-0.251101	0.21	0.419	1.64196e-12	1|3
CA27_dura_base_skull_13	PELI1	4.22754e-16	-0.25927	0.341	0.578	1.3458e-11	1|3
CA27_dura_base_skull_13	AC093916.1	1.09811e-15	-0.480649	0.235	0.46	3.49573e-11	1|3
CA27_dura_base_skull_13	GLIS3	1.30176e-15	-0.456852	0.413	0.657	4.14401e-11	1|3
CA27_dura_base_skull_13	SH3GL3	1.4026e-15	0.297508	0.469	0.584	4.46503e-11	1|3
CA27_dura_base_skull_13	SMAD9	2.04309e-15	0.290954	0.454	0.54	6.50398e-11	1|3
CA27_dura_base_skull_13	SRGAP1	2.6092e-15	-0.308255	0.403	0.629	8.30612e-11	1|3
CA27_dura_base_skull_13	KMO	2.62652e-15	-0.300076	0.072	0.229	8.36128e-11	1|3
CA27_dura_base_skull_13	TTC39C	2.78504e-15	-0.280421	0.312	0.527	8.86589e-11	1|3
CA27_dura_base_skull_13	AL357153.2	4.22641e-15	0.251516	0.459	0.559	1.34544e-10	1|3
CA27_dura_base_skull_13	TENM2	4.31508e-15	0.362525	0.311	0.47	1.37366e-10	1|3
CA27_dura_base_skull_13	RORB	4.70876e-15	-0.289661	0.472	0.711	1.49899e-10	1|3
CA27_dura_base_skull_13	RBMS3	4.80769e-15	-0.55269	0.312	0.543	1.53048e-10	1|3
CA27_dura_base_skull_13	KDM3A	5.31636e-15	0.316197	0.522	0.625	1.69241e-10	1|3
CA27_dura_base_skull_13	PPARGC1A	6.85388e-15	-0.338672	0.352	0.581	2.18186e-10	1|3
CA27_dura_base_skull_13	RFLNA	1.22084e-14	-0.339947	0.515	0.746	3.88641e-10	1|3
CA27_dura_base_skull_13	LIFR	1.33272e-14	0.298779	0.648	0.771	4.24257e-10	1|3
CA27_dura_base_skull_13	BX284613.2	1.54354e-14	-0.367791	0.152	0.33	4.9137e-10	1|3
CA27_dura_base_skull_13	WSB2	1.66506e-14	-0.338279	0.368	0.597	5.30056e-10	1|3
CA27_dura_base_skull_13	HIF1A-AS3	1.78599e-14	0.292393	0.465	0.606	5.68551e-10	1|3
CA27_dura_base_skull_13	LDLRAD4	2.03583e-14	-0.297837	0.386	0.613	6.48087e-10	1|3
CA27_dura_base_skull_13	AKAP6	2.56292e-14	-0.35618	0.357	0.587	8.1588e-10	1|3
CA27_dura_base_skull_13	STK17A	2.83831e-14	-0.300327	0.258	0.451	9.03547e-10	1|3
CA27_dura_base_skull_13	ODC1	6.05673e-14	0.327709	0.504	0.559	1.9281e-09	1|3
CA27_dura_base_skull_13	SLC9A9	6.16342e-14	-0.27321	0.486	0.711	1.96206e-09	1|3
CA27_dura_base_skull_13	MYH9	7.00542e-14	0.258362	0.627	0.702	2.23011e-09	1|3
CA27_dura_base_skull_13	SLC26A7	1.13031e-13	-0.39314	0.222	0.416	3.59824e-09	1|3
CA27_dura_base_skull_13	WSB1	1.41283e-13	0.368902	0.593	0.683	4.4976e-09	1|3
CA27_dura_base_skull_13	ZNF385B	1.46517e-13	-0.294509	0.431	0.654	4.66421e-09	1|3
CA27_dura_base_skull_13	OCLN	1.48114e-13	0.266628	0.521	0.667	4.71507e-09	1|3
CA27_dura_base_skull_13	ROBO1	1.95556e-13	-0.322407	0.52	0.743	6.22533e-09	1|3
CA27_dura_base_skull_13	AL078590.2	2.12184e-13	-0.300651	0.146	0.308	6.75467e-09	1|3
CA27_dura_base_skull_13	OSMR	3.73529e-13	-0.280941	0.35	0.568	1.18909e-08	1|3
CA27_dura_base_skull_13	AC083837.1	4.47342e-13	-0.429295	0.423	0.648	1.42407e-08	1|3
CA27_dura_base_skull_13	PRELID2	4.54824e-13	0.471127	0.49	0.6	1.44789e-08	1|3
CA27_dura_base_skull_13	CECR2	4.93077e-13	-0.254444	0.132	0.286	1.56966e-08	1|3
CA27_dura_base_skull_13	EXTL3	5.41406e-13	-0.313108	0.312	0.514	1.72351e-08	1|3
CA27_dura_base_skull_13	SEMA3E	5.4745e-13	-0.262508	0.481	0.698	1.74275e-08	1|3
CA27_dura_base_skull_13	DPP6	1.53019e-12	-0.407133	0.393	0.606	4.87121e-08	1|3
CA27_dura_base_skull_13	MT-ATP8	1.95285e-12	-0.266347	0.419	0.61	6.2167e-08	1|3
CA27_dura_base_skull_13	HSPA4	4.79589e-12	-0.295397	0.485	0.683	1.52672e-07	1|3
CA27_dura_base_skull_13	RUNX1	5.39439e-12	-0.337514	0.51	0.721	1.71725e-07	1|3
CA27_dura_base_skull_13	ABHD3	5.82382e-12	-0.294042	0.325	0.508	1.85396e-07	1|3
CA27_dura_base_skull_13	CREB3L2	6.50756e-12	0.379164	0.594	0.698	2.07162e-07	1|3
CA27_dura_base_skull_13	FGL1	8.98735e-12	-0.320817	0.085	0.219	2.86103e-07	1|3
CA27_dura_base_skull_13	THRB	1.53e-11	-0.315159	0.508	0.705	4.87059e-07	1|3
CA27_dura_base_skull_13	KIAA0319	1.70834e-11	0.280618	0.585	0.676	5.43833e-07	1|3
CA27_dura_base_skull_13	AR	1.89856e-11	0.309398	0.604	0.702	6.04388e-07	1|3
CA27_dura_base_skull_13	DIAPH3	2.90337e-11	0.27378	0.289	0.425	9.24257e-07	1|3
CA27_dura_base_skull_13	KRT19	4.35139e-11	0.281776	0.594	0.667	1.38522e-06	1|3
CA27_dura_base_skull_13	PFKFB4	4.63004e-11	0.365693	0.562	0.641	1.47393e-06	1|3
CA27_dura_base_skull_13	ST6GAL1	9.11862e-11	-0.291984	0.373	0.568	2.90282e-06	1|3
CA27_dura_base_skull_13	SOCS2-AS1	9.92615e-11	-0.529906	0.523	0.711	3.15989e-06	1|3
CA27_dura_base_skull_13	AC008415.1	1.92746e-10	0.383356	0.377	0.473	6.13589e-06	1|3
CA27_dura_base_skull_13	CNTNAP2	2.21281e-10	-0.282067	0.536	0.708	7.04427e-06	1|3
CA27_dura_base_skull_13	AC109466.1	3.00977e-10	0.277738	0.325	0.419	9.5813e-06	1|3
CA27_dura_base_skull_13	LARP4	3.01245e-10	-0.331257	0.671	0.835	9.58984e-06	1|3
CA27_dura_base_skull_13	PITPNC1	6.31984e-10	-0.31057	0.563	0.749	2.01186e-05	1|3
CA27_dura_base_skull_13	PAG1	1.37912e-09	0.331207	0.509	0.59	4.3903e-05	1|3
CA27_dura_base_skull_13	NELL2	1.91011e-09	-0.541558	0.235	0.403	6.08064e-05	1|3
CA27_dura_base_skull_13	ANKRD37	3.15691e-09	0.904747	0.381	0.4	0.000100497	1|3
CA27_dura_base_skull_13	C5	4.50959e-09	-0.264963	0.492	0.676	0.000143558	1|3
CA27_dura_base_skull_13	NEDD9	5.5017e-09	0.323797	0.731	0.765	0.000175141	1|3
CA27_dura_base_skull_13	DNM2	5.85411e-09	0.37907	0.675	0.74	0.00018636	1|3
CA27_dura_base_skull_13	NKAIN2	6.9097e-09	-0.414923	0.078	0.187	0.000219964	1|3
CA27_dura_base_skull_13	TNIK	1.26006e-08	-0.306654	0.139	0.273	0.000401128	1|3
CA27_dura_base_skull_13	NDRG1	1.70719e-08	0.543294	0.801	0.841	0.000543467	1|3
CA27_dura_base_skull_13	PLPP1	2.04819e-08	-0.339741	0.983	0.99	0.000652022	1|3
CA27_dura_base_skull_13	STXBP5L	2.79307e-08	-0.258137	0.123	0.241	0.000889146	1|3
CA27_dura_base_skull_13	CACNA1C	3.14557e-08	-0.41419	0.541	0.711	0.00100136	1|3
CA27_dura_base_skull_13	FAM162A	3.38037e-08	0.385061	0.681	0.756	0.00107611	1|3
CA27_dura_base_skull_13	TBCD	3.78087e-08	0.254994	0.74	0.781	0.0012036	1|3
CA27_dura_base_skull_13	HERC3	4.02641e-08	0.267886	0.62	0.692	0.00128177	1|3
CA27_dura_base_skull_13	ARHGEF3	4.91405e-08	-0.253587	0.595	0.759	0.00156434	1|3
CA27_dura_base_skull_13	FSTL4	5.33353e-08	-0.375775	0.722	0.848	0.00169787	1|3
CA27_dura_base_skull_13	FLNB	7.54936e-08	0.288084	0.755	0.816	0.00240326	1|3
CA27_dura_base_skull_13	GAB2	3.1359e-07	-0.283196	0.115	0.222	0.00998282	1|3
CA27_dura_base_skull_13	UTRN	3.22418e-07	-0.340067	0.877	0.898	0.0102639	1|3
CA27_dura_base_skull_13	SORBS1	3.31973e-07	-0.252699	0.678	0.822	0.010568	1|3
CA27_dura_base_skull_13	BORCS5	5.3701e-07	-0.281476	0.684	0.822	0.0170952	1|3
CA27_dura_base_skull_13	ARID5B	7.26194e-07	-0.331722	0.712	0.825	0.0231177	1|3
CA27_dura_base_skull_13	ATXN1	7.40441e-07	0.25496	0.602	0.689	0.0235712	1|3
CA27_dura_base_skull_13	NAMPT	7.4384e-07	-0.396148	0.896	0.921	0.0236794	1|3
CA27_dura_base_skull_13	RUFY3	1.06905e-06	-0.282026	0.675	0.806	0.0340321	1|3
CA27_dura_base_skull_13	ST7	1.10876e-06	-0.373002	0.583	0.733	0.0352962	1|3
CA27_dura_base_skull_13	CDC14B	1.1341e-06	-0.275761	0.745	0.86	0.0361031	1|3
CA27_dura_base_skull_13	SLCO3A1	1.15335e-06	-0.308881	0.09	0.187	0.0367157	1|3
CA27_dura_base_skull_13	CYP4X1	1.03174e-18	-0.262587	0.311	0.565	3.28446e-14	2|3
CA27_dura_base_skull_13	NCAM2	2.75229e-17	-0.566569	0.556	0.803	8.76165e-13	2|3
CA27_dura_base_skull_13	TENM1	4.8141e-15	-0.29265	0.551	0.787	1.53252e-10	2|3
CA27_dura_base_skull_13	SDK2	1.52919e-14	0.328466	0.193	0.343	4.86802e-10	2|3
CA27_dura_base_skull_13	PPM1L	7.27764e-14	-0.252764	0.262	0.448	2.31677e-09	2|3
CA27_dura_base_skull_13	MYH9	1.77895e-13	0.250395	0.627	0.702	5.6631e-09	2|3
CA27_dura_base_skull_13	NRXN3	3.57834e-13	0.25098	0.402	0.559	1.13913e-08	2|3
CA27_dura_base_skull_13	CORO1C	4.32273e-13	0.261937	0.452	0.568	1.3761e-08	2|3
CA27_dura_base_skull_13	XACT	7.99556e-13	-0.378996	0.409	0.632	2.54531e-08	2|3
CA27_dura_base_skull_13	FBXL7	2.46033e-12	0.279926	0.603	0.692	7.83221e-08	2|3
CA27_dura_base_skull_13	UBA3	2.48501e-12	-0.260079	0.479	0.67	7.91079e-08	2|3
CA27_dura_base_skull_13	MID1	8.70705e-12	-0.289072	0.525	0.73	2.7718e-07	2|3
CA27_dura_base_skull_13	DBF4	5.679e-11	-0.254032	0.423	0.625	1.80785e-06	2|3
CA27_dura_base_skull_13	CECR2	6.41575e-11	-0.261444	0.138	0.286	2.04239e-06	2|3
CA27_dura_base_skull_13	POLQ	9.95012e-11	-0.274309	0.146	0.308	3.16752e-06	2|3
CA27_dura_base_skull_13	RBMS3	2.77096e-10	-0.427479	0.352	0.543	8.82107e-06	2|3
CA27_dura_base_skull_13	NAALADL2	6.7014e-10	-0.384235	0.948	0.952	2.13332e-05	2|3
CA27_dura_base_skull_13	DEPDC1B	2.12863e-09	-0.318986	0.251	0.419	6.77627e-05	2|3
CA27_dura_base_skull_13	TPX2	3.02473e-09	-0.281338	0.133	0.273	9.62892e-05	2|3
CA27_dura_base_skull_13	PDE3A	3.61647e-09	0.427917	0.33	0.416	0.000115127	2|3
CA27_dura_base_skull_13	TGM4	1.33713e-08	-0.356508	0.612	0.775	0.000425661	2|3
CA27_dura_base_skull_13	FGL1	2.93555e-08	-0.310376	0.1	0.219	0.000934502	2|3
CA27_dura_base_skull_13	ACSL3	6.37684e-08	-0.280376	0.539	0.708	0.00203	2|3
CA27_dura_base_skull_13	AL136114.1	1.93015e-07	0.299955	0.15	0.232	0.00614443	2|3
CA27_dura_base_skull_13	NAV3	2.19683e-07	0.250486	0.16	0.219	0.00699338	2|3
CA27_dura_base_skull_13	NDRG1	2.60292e-07	0.297388	0.746	0.841	0.00828614	2|3
CA27_dura_base_skull_13	CYTH3	3.48977e-07	-0.261585	0.66	0.803	0.0111093	2|3
CA27_dura_base_skull_13	ANKRD37	6.16644e-07	0.398972	0.311	0.4	0.0196302	2|3
CA27_dura_base_skull_13	THSD7A	6.9457e-07	0.345421	0.1	0.181	0.0221109	2|3
CA27_paraaortic_lymph_node_1	CPNE4	0	-2.43754	0.552	0.977	0	2|3
CA27_paraaortic_lymph_node_1	GPM6A	0	2.71013	0.941	0.3	0	2|3
CA27_paraaortic_lymph_node_1	PTPRT	0	2.70079	0.926	0.288	0	2|3
CA27_paraaortic_lymph_node_1	MAP2	5.30739e-247	2.06311	0.833	0.268	1.71981e-242	2|3
CA27_paraaortic_lymph_node_1	ERBIN	1.87524e-231	-1.35155	0.128	0.746	6.07654e-227	2|3
CA27_paraaortic_lymph_node_1	SH3RF1	7.47442e-231	1.27664	0.995	0.952	2.42201e-226	2|3
CA27_paraaortic_lymph_node_1	AC064875.1	8.92982e-221	2.29972	0.678	0.064	2.89362e-216	2|3
CA27_paraaortic_lymph_node_1	TENM2	5.71007e-212	1.8062	0.958	0.74	1.85029e-207	2|3
CA27_paraaortic_lymph_node_1	LINC02163	1.59785e-207	-1.3715	0.032	0.567	5.17768e-203	2|3
CA27_paraaortic_lymph_node_1	PCA3	5.09125e-199	-1.73538	0.125	0.658	1.64977e-194	2|3
CA27_paraaortic_lymph_node_1	CERS6	2.43386e-185	1.42058	0.917	0.653	7.88666e-181	2|3
CA27_paraaortic_lymph_node_1	STK39	1.90699e-175	1.20024	0.977	0.9	6.17942e-171	2|3
CA27_paraaortic_lymph_node_1	GALNT17	2.76251e-164	-1.07945	0.045	0.519	8.95164e-160	2|3
CA27_paraaortic_lymph_node_1	GUCY1A1	1.96693e-161	-1.5293	0.339	0.798	6.37363e-157	2|3
CA27_paraaortic_lymph_node_1	MIR646HG	2.09721e-160	-0.893496	0.049	0.521	6.7958e-156	2|3
CA27_paraaortic_lymph_node_1	SERINC5	4.04179e-145	-1.17913	0.714	0.932	1.3097e-140	2|3
CA27_paraaortic_lymph_node_1	AC007319.1	1.17941e-141	-0.910671	0.025	0.424	3.82176e-137	2|3
CA27_paraaortic_lymph_node_1	PRUNE2	6.00788e-138	-1.33256	0.326	0.746	1.94679e-133	2|3
CA27_paraaortic_lymph_node_1	AC010983.1	2.86723e-137	1.37708	0.924	0.748	9.29098e-133	2|3
CA27_paraaortic_lymph_node_1	SLC4A4	3.52895e-136	-1.76335	0.242	0.681	1.14352e-131	2|3
CA27_paraaortic_lymph_node_1	MIR99AHG	1.71018e-133	1.50468	0.878	0.613	5.54167e-129	2|3
CA27_paraaortic_lymph_node_1	XKR6	2.21492e-132	-0.90483	0.116	0.585	7.17721e-128	2|3
CA27_paraaortic_lymph_node_1	ARLNC1	3.63187e-132	-1.21728	0.203	0.675	1.17687e-127	2|3
CA27_paraaortic_lymph_node_1	CSNK1A1	6.5198e-132	-1.09515	0.706	0.935	2.11268e-127	2|3
CA27_paraaortic_lymph_node_1	MBOAT2	4.28371e-131	1.18332	0.856	0.607	1.38809e-126	2|3
CA27_paraaortic_lymph_node_1	LRRTM4	2.64373e-129	2.09132	0.616	0.189	8.56675e-125	2|3
CA27_paraaortic_lymph_node_1	TMEFF2	1.96654e-127	1.44768	0.927	0.697	6.37237e-123	2|3
CA27_paraaortic_lymph_node_1	ZSWIM6	4.93614e-122	-1.16166	0.496	0.855	1.59951e-117	2|3
CA27_paraaortic_lymph_node_1	UNC13B	3.68537e-118	0.747287	0.99	0.952	1.19421e-113	2|3
CA27_paraaortic_lymph_node_1	KCNMA1	6.07319e-117	1.39531	0.727	0.32	1.96796e-112	2|3
CA27_paraaortic_lymph_node_1	PLPP1	5.40313e-113	-1.61751	0.971	0.99	1.75083e-108	2|3
CA27_paraaortic_lymph_node_1	ACADL	1.4462e-112	1.03741	0.831	0.601	4.68627e-108	2|3
CA27_paraaortic_lymph_node_1	KCNN2	2.71259e-112	-1.26961	0.425	0.789	8.78986e-108	2|3
CA27_paraaortic_lymph_node_1	RHOBTB1	6.41935e-112	-1.39329	0.517	0.73	2.08013e-107	2|3
CA27_paraaortic_lymph_node_1	HSD17B4	6.7177e-110	-1.17371	0.642	0.879	2.1768e-105	2|3
CA27_paraaortic_lymph_node_1	AR	2.45472e-107	1.16733	0.896	0.701	7.95429e-103	2|3
CA27_paraaortic_lymph_node_1	GPHN	2.75174e-106	0.673055	0.994	0.974	8.91675e-102	2|3
CA27_paraaortic_lymph_node_1	DTNA	3.6785e-106	-0.61747	0.012	0.31	1.19198e-101	2|3
CA27_paraaortic_lymph_node_1	MIR181A1HG	5.19264e-105	0.840898	0.439	0.051	1.68262e-100	2|3
CA27_paraaortic_lymph_node_1	YAP1	3.84314e-104	-0.953011	0.129	0.542	1.24533e-99	2|3
CA27_paraaortic_lymph_node_1	PRR16	1.26802e-102	-1.25193	0.832	0.95	4.1089e-98	2|3
CA27_paraaortic_lymph_node_1	MPP6	1.98752e-101	1.04176	0.94	0.806	6.44035e-97	2|3
CA27_paraaortic_lymph_node_1	RELN	7.27216e-99	-1.45886	0.229	0.577	2.35647e-94	2|3
CA27_paraaortic_lymph_node_1	TGM4	4.26128e-98	-1.89302	0.322	0.678	1.38083e-93	2|3
CA27_paraaortic_lymph_node_1	DAPK1	2.26712e-97	0.940826	0.492	0.099	7.34637e-93	2|3
CA27_paraaortic_lymph_node_1	PHACTR2	2.2226e-96	-1.098	0.399	0.717	7.2021e-92	2|3
CA27_paraaortic_lymph_node_1	LGR4	3.55497e-96	1.14587	0.659	0.294	1.15195e-91	2|3
CA27_paraaortic_lymph_node_1	NR3C1	9.39711e-96	-0.776554	0.106	0.487	3.04504e-91	2|3
CA27_paraaortic_lymph_node_1	SMOC1	2.06634e-95	-1.35803	0.057	0.393	6.69577e-91	2|3
CA27_paraaortic_lymph_node_1	CSGALNACT1	7.82141e-95	-0.947201	0.198	0.615	2.53445e-90	2|3
CA27_paraaortic_lymph_node_1	GRID1	5.2594e-91	0.925542	0.567	0.217	1.70426e-86	2|3
CA27_paraaortic_lymph_node_1	NOTCH2NLC	9.39417e-90	1.01872	0.747	0.519	3.04409e-85	2|3
CA27_paraaortic_lymph_node_1	NAV1	9.62271e-89	1.03581	0.896	0.723	3.11814e-84	2|3
CA27_paraaortic_lymph_node_1	PTPN18	3.00657e-88	0.845039	0.714	0.455	9.74248e-84	2|3
CA27_paraaortic_lymph_node_1	AC004009.1	5.38401e-88	0.768157	0.517	0.129	1.74463e-83	2|3
CA27_paraaortic_lymph_node_1	NRXN3	2.39978e-87	1.14074	0.752	0.408	7.77624e-83	2|3
CA27_paraaortic_lymph_node_1	PPP3CA	5.18961e-87	0.571853	0.999	1	1.68164e-82	2|3
CA27_paraaortic_lymph_node_1	KANK1	9.7028e-86	0.810059	0.866	0.674	3.14409e-81	2|3
CA27_paraaortic_lymph_node_1	AC093912.1	1.32848e-85	1.07929	0.315	0.018	4.30481e-81	2|3
CA27_paraaortic_lymph_node_1	MCCC2	3.71817e-84	-0.80481	0.322	0.704	1.20484e-79	2|3
CA27_paraaortic_lymph_node_1	MAML3	3.53652e-83	0.850682	0.929	0.811	1.14597e-78	2|3
CA27_paraaortic_lymph_node_1	DOCK8	1.04293e-82	1.02248	0.775	0.504	3.37949e-78	2|3
CA27_paraaortic_lymph_node_1	AC006994.2	4.96701e-81	0.924766	0.72	0.417	1.60951e-76	2|3
CA27_paraaortic_lymph_node_1	COLEC12	5.58809e-81	0.853831	0.945	0.819	1.81077e-76	2|3
CA27_paraaortic_lymph_node_1	EPHA5	2.36646e-80	-0.756874	0.058	0.364	7.66827e-76	2|3
CA27_paraaortic_lymph_node_1	PPFIA2	3.75818e-80	1.17507	0.772	0.512	1.2178e-75	2|3
CA27_paraaortic_lymph_node_1	SESN3	4.18516e-80	1.04545	0.799	0.561	1.35616e-75	2|3
CA27_paraaortic_lymph_node_1	ZNF385B	7.49296e-80	-0.727285	0.021	0.277	2.42802e-75	2|3
CA27_paraaortic_lymph_node_1	DMXL1	5.08741e-79	-0.671007	0.82	0.937	1.64853e-74	2|3
CA27_paraaortic_lymph_node_1	EBF1	2.11686e-78	-1.71316	0.087	0.39	6.85948e-74	2|3
CA27_paraaortic_lymph_node_1	WWC1	3.94622e-78	-1.04123	0.738	0.896	1.27873e-73	2|3
CA27_paraaortic_lymph_node_1	ANOS1	4.89811e-78	1.01751	0.832	0.647	1.58718e-73	2|3
CA27_paraaortic_lymph_node_1	MBP	1.59673e-76	-0.821424	0.286	0.655	5.17403e-72	2|3
CA27_paraaortic_lymph_node_1	SOX6	2.02411e-76	1.2786	0.479	0.171	6.55893e-72	2|3
CA27_paraaortic_lymph_node_1	NRG3	1.22795e-74	1.08333	0.716	0.44	3.97904e-70	2|3
CA27_paraaortic_lymph_node_1	AF117829.1	4.37393e-74	-0.687268	0.838	0.938	1.41733e-69	2|3
CA27_paraaortic_lymph_node_1	AC111006.1	1.35607e-71	-0.55622	0.116	0.444	4.3942e-67	2|3
CA27_paraaortic_lymph_node_1	CHN1	1.63604e-71	0.806062	0.496	0.153	5.30142e-67	2|3
CA27_paraaortic_lymph_node_1	AL451127.2	3.7199e-70	-0.273553	0.007	0.205	1.2054e-65	2|3
CA27_paraaortic_lymph_node_1	PRKCA	4.12592e-70	0.69432	0.924	0.834	1.33696e-65	2|3
CA27_paraaortic_lymph_node_1	NCAM2	1.78087e-69	-1.7415	0.25	0.532	5.77073e-65	2|3
CA27_paraaortic_lymph_node_1	KANSL1L	1.14386e-68	0.820424	0.815	0.655	3.70655e-64	2|3
CA27_paraaortic_lymph_node_1	NAALADL2	6.69328e-68	1.03133	0.924	0.856	2.16889e-63	2|3
CA27_paraaortic_lymph_node_1	SNHG14	1.13831e-67	-0.735939	0.47	0.765	3.68858e-63	2|3
CA27_paraaortic_lymph_node_1	NETO1	2.64469e-67	-0.534624	0.048	0.311	8.56986e-63	2|3
CA27_paraaortic_lymph_node_1	CCSER1	1.71757e-66	0.703251	0.98	0.913	5.5656e-62	2|3
CA27_paraaortic_lymph_node_1	SHISA9	1.22201e-65	0.858987	0.281	0.026	3.95979e-61	2|3
CA27_paraaortic_lymph_node_1	RBMS3	1.337e-64	-1.34412	0.21	0.512	4.33242e-60	2|3
CA27_paraaortic_lymph_node_1	PKP4	2.2673e-64	0.694746	0.825	0.717	7.34696e-60	2|3
CA27_paraaortic_lymph_node_1	CHST9	3.17547e-64	0.629474	0.299	0.036	1.02898e-59	2|3
CA27_paraaortic_lymph_node_1	BMPR1B	4.26073e-64	0.81249	0.977	0.942	1.38065e-59	2|3
CA27_paraaortic_lymph_node_1	VPS50	4.99528e-64	0.863594	0.629	0.491	1.61867e-59	2|3
CA27_paraaortic_lymph_node_1	FGF13	9.45287e-64	0.708302	0.99	0.957	3.06311e-59	2|3
CA27_paraaortic_lymph_node_1	DNAH5	1.0927e-63	1.26714	0.734	0.635	3.54078e-59	2|3
CA27_paraaortic_lymph_node_1	SPOCK1	1.82239e-63	0.74473	0.823	0.583	5.90527e-59	2|3
CA27_paraaortic_lymph_node_1	TENM1	3.43466e-63	-0.805787	0.352	0.701	1.11297e-58	2|3
CA27_paraaortic_lymph_node_1	ZBTB7C	5.114e-63	0.656998	0.421	0.132	1.65714e-58	2|3
CA27_paraaortic_lymph_node_1	LINC02197	5.61802e-63	0.580812	0.253	0.018	1.82046e-58	2|3
CA27_paraaortic_lymph_node_1	AC005062.1	9.57687e-63	0.622713	0.27	0.025	3.10329e-58	2|3
CA27_paraaortic_lymph_node_1	KCNMB2	1.08276e-62	0.938253	0.82	0.571	3.50856e-58	2|3
CA27_paraaortic_lymph_node_1	DOK6	2.79109e-62	0.950481	0.654	0.384	9.04424e-58	2|3
CA27_paraaortic_lymph_node_1	ARID5B	7.37529e-62	-0.857206	0.427	0.73	2.38989e-57	2|3
CA27_paraaortic_lymph_node_1	UCK2	9.62591e-62	0.684236	0.813	0.666	3.11918e-57	2|3
CA27_paraaortic_lymph_node_1	RASAL2	2.15866e-61	0.62907	0.974	0.924	6.99491e-57	2|3
CA27_paraaortic_lymph_node_1	TBC1D1	4.32899e-61	-0.632674	0.201	0.518	1.40276e-56	2|3
CA27_paraaortic_lymph_node_1	ABLIM3	9.38937e-61	-0.475544	0.119	0.418	3.04253e-56	2|3
CA27_paraaortic_lymph_node_1	KLHL29	9.59664e-61	-0.375655	0.035	0.262	3.1097e-56	2|3
CA27_paraaortic_lymph_node_1	AC093866.1	1.01808e-59	-0.65552	0.21	0.538	3.299e-55	2|3
CA27_paraaortic_lymph_node_1	ABCC5	1.36114e-59	-0.805707	0.263	0.584	4.41064e-55	2|3
CA27_paraaortic_lymph_node_1	AC078864.1	2.00458e-59	-0.367137	0.012	0.2	6.49565e-55	2|3
CA27_paraaortic_lymph_node_1	NR3C2	7.4208e-59	0.821478	0.752	0.584	2.40464e-54	2|3
CA27_paraaortic_lymph_node_1	TRIM36	9.36862e-59	-0.693719	0.522	0.794	3.03581e-54	2|3
CA27_paraaortic_lymph_node_1	LINC01087	2.88591e-58	-0.302461	0.056	0.286	9.35149e-54	2|3
CA27_paraaortic_lymph_node_1	LRRN1	3.30321e-57	0.842279	0.58	0.287	1.07037e-52	2|3
CA27_paraaortic_lymph_node_1	PCAT14	4.73261e-57	-0.534627	0.085	0.35	1.53356e-52	2|3
CA27_paraaortic_lymph_node_1	PRKN	5.25968e-57	-0.469103	0.016	0.204	1.70435e-52	2|3
CA27_paraaortic_lymph_node_1	AMACR	5.36106e-57	-0.467253	0.075	0.334	1.7372e-52	2|3
CA27_paraaortic_lymph_node_1	TMEM132B	1.07063e-56	-1.00434	0.134	0.415	3.46928e-52	2|3
CA27_paraaortic_lymph_node_1	STEAP4	1.88561e-56	-0.770593	0.095	0.363	6.11012e-52	2|3
CA27_paraaortic_lymph_node_1	DSCAM-AS1	2.14084e-56	-0.616958	0.109	0.387	6.93719e-52	2|3
CA27_paraaortic_lymph_node_1	ROBO1	6.91969e-56	-1.12515	0.057	0.295	2.24226e-51	2|3
CA27_paraaortic_lymph_node_1	LINC01331	1.10255e-55	-0.532415	0.016	0.203	3.57269e-51	2|3
CA27_paraaortic_lymph_node_1	BX284613.2	2.71309e-55	-1.05408	0.032	0.237	8.7915e-51	2|3
CA27_paraaortic_lymph_node_1	AC097537.1	3.61167e-55	0.421915	0.207	0.01	1.17032e-50	2|3
CA27_paraaortic_lymph_node_1	CHRM3	4.34872e-55	-0.344742	0.005	0.161	1.40916e-50	2|3
CA27_paraaortic_lymph_node_1	PKIB	1.91072e-54	-0.57018	0.21	0.523	6.1915e-50	2|3
CA27_paraaortic_lymph_node_1	PLEKHB2	1.0104e-53	-0.749437	0.306	0.611	3.2741e-49	2|3
CA27_paraaortic_lymph_node_1	ZNF217	5.02896e-53	-0.486074	0.171	0.468	1.62958e-48	2|3
CA27_paraaortic_lymph_node_1	ZDHHC14	1.20323e-52	0.701621	0.777	0.572	3.89896e-48	2|3
CA27_paraaortic_lymph_node_1	PCAT4	1.5957e-52	-0.805503	0.029	0.222	5.17071e-48	2|3
CA27_paraaortic_lymph_node_1	LINC02343	1.90556e-52	-0.680223	0.204	0.507	6.17479e-48	2|3
CA27_paraaortic_lymph_node_1	RNF19A	4.9884e-52	-0.601749	0.38	0.682	1.61644e-47	2|3
CA27_paraaortic_lymph_node_1	AC096741.1	1.67973e-51	0.676863	0.558	0.345	5.443e-47	2|3
CA27_paraaortic_lymph_node_1	WASF3	2.46304e-51	-0.544999	0.25	0.553	7.98123e-47	2|3
CA27_paraaortic_lymph_node_1	CBWD1	3.40658e-51	0.665272	0.693	0.482	1.10387e-46	2|3
CA27_paraaortic_lymph_node_1	AC069228.1	1.27575e-50	0.892185	0.564	0.3	4.13392e-46	2|3
CA27_paraaortic_lymph_node_1	PPP2R2C	1.69758e-50	-0.296018	0.04	0.247	5.50085e-46	2|3
CA27_paraaortic_lymph_node_1	CPEB4	2.47972e-50	-0.510866	0.199	0.494	8.03528e-46	2|3
CA27_paraaortic_lymph_node_1	NRP1	3.03471e-50	0.624874	0.482	0.188	9.83367e-46	2|3
CA27_paraaortic_lymph_node_1	TFEB	3.6482e-50	-0.478605	0.14	0.416	1.18216e-45	2|3
CA27_paraaortic_lymph_node_1	EGFR	5.14811e-50	0.595296	0.835	0.7	1.66819e-45	2|3
CA27_paraaortic_lymph_node_1	MSMB	8.11302e-50	-0.454136	0.093	0.341	2.62894e-45	2|3
CA27_paraaortic_lymph_node_1	CDK8	1.45032e-49	-0.631507	0.377	0.665	4.69961e-45	2|3
CA27_paraaortic_lymph_node_1	CCNH	1.45863e-49	-0.681212	0.509	0.755	4.72655e-45	2|3
CA27_paraaortic_lymph_node_1	AC007402.1	1.98717e-49	1.06008	0.188	0.01	6.43923e-45	2|3
CA27_paraaortic_lymph_node_1	SSBP2	2.02203e-49	-0.636455	0.597	0.816	6.55217e-45	2|3
CA27_paraaortic_lymph_node_1	HS3ST1	2.07313e-49	0.895629	0.451	0.19	6.71778e-45	2|3
CA27_paraaortic_lymph_node_1	AC004485.1	2.94379e-49	0.733893	0.405	0.14	9.53907e-45	2|3
CA27_paraaortic_lymph_node_1	FSTL4	1.03404e-48	-1.07511	0.355	0.635	3.35071e-44	2|3
CA27_paraaortic_lymph_node_1	NBEA	1.46892e-48	-0.58866	0.756	0.918	4.75988e-44	2|3
CA27_paraaortic_lymph_node_1	OSMR	1.97665e-48	-0.760896	0.158	0.426	6.40513e-44	2|3
CA27_paraaortic_lymph_node_1	SERGEF	2.06908e-48	-1.18223	0.642	0.822	6.70463e-44	2|3
CA27_paraaortic_lymph_node_1	PHYHIPL	6.27666e-48	0.498671	0.246	0.041	2.03389e-43	2|3
CA27_paraaortic_lymph_node_1	ARHGEF38	6.88753e-48	-0.572946	0.385	0.692	2.23184e-43	2|3
CA27_paraaortic_lymph_node_1	VSTM2L	8.15596e-48	-0.589264	0.148	0.413	2.64286e-43	2|3
CA27_paraaortic_lymph_node_1	SMOC2	2.22812e-47	0.698047	0.584	0.363	7.21999e-43	2|3
CA27_paraaortic_lymph_node_1	CATSPERB	2.41163e-47	-0.8307	0.724	0.855	7.81465e-43	2|3
CA27_paraaortic_lymph_node_1	LINC01790	8.96304e-47	0.644505	0.424	0.182	2.90438e-42	2|3
CA27_paraaortic_lymph_node_1	RB1CC1	1.14493e-46	-0.528943	0.375	0.672	3.71003e-42	2|3
CA27_paraaortic_lymph_node_1	LTBP1	1.56227e-46	-1.03049	0.083	0.298	5.06239e-42	2|3
CA27_paraaortic_lymph_node_1	TBPL1	2.24149e-46	0.717574	0.577	0.414	7.26332e-42	2|3
CA27_paraaortic_lymph_node_1	FNIP1	3.81784e-46	-0.551146	0.642	0.846	1.23713e-41	2|3
CA27_paraaortic_lymph_node_1	TNFAIP8	4.20968e-46	-0.950002	0.64	0.82	1.36411e-41	2|3
CA27_paraaortic_lymph_node_1	FOXO1	6.75348e-46	-0.273473	0.082	0.301	2.1884e-41	2|3
CA27_paraaortic_lymph_node_1	ANKHD1	1.12396e-45	-0.514216	0.676	0.867	3.64207e-41	2|3
CA27_paraaortic_lymph_node_1	AGBL4	3.68196e-45	0.636851	0.815	0.629	1.1931e-40	2|3
CA27_paraaortic_lymph_node_1	SPIDR	5.80295e-45	-0.492042	0.931	0.975	1.88039e-40	2|3
CA27_paraaortic_lymph_node_1	RAI14	1.68654e-44	0.640728	0.722	0.534	5.46507e-40	2|3
CA27_paraaortic_lymph_node_1	ATP8A2	2.85326e-44	-0.617172	0.182	0.447	9.24569e-40	2|3
CA27_paraaortic_lymph_node_1	PDZD2	2.87241e-44	0.694228	0.581	0.377	9.30777e-40	2|3
CA27_paraaortic_lymph_node_1	AC098617.1	3.04541e-44	0.749537	0.598	0.351	9.86836e-40	2|3
CA27_paraaortic_lymph_node_1	BASP1-AS1	4.06318e-44	0.706077	0.605	0.416	1.31663e-39	2|3
CA27_paraaortic_lymph_node_1	TLK1	8.84834e-44	0.534866	0.872	0.792	2.86722e-39	2|3
CA27_paraaortic_lymph_node_1	SLC25A16	1.00524e-43	-0.591253	0.601	0.803	3.25739e-39	2|3
CA27_paraaortic_lymph_node_1	AFF3	1.28545e-43	-0.688297	0.439	0.707	4.16536e-39	2|3
CA27_paraaortic_lymph_node_1	SAMD12	2.42909e-43	-0.555994	0.562	0.8	7.87123e-39	2|3
CA27_paraaortic_lymph_node_1	GRIP1	2.47702e-43	0.674536	0.696	0.54	8.02653e-39	2|3
CA27_paraaortic_lymph_node_1	BEND4	5.51539e-43	-0.308939	0.074	0.291	1.78721e-38	2|3
CA27_paraaortic_lymph_node_1	JMY	6.32043e-43	-0.449964	0.272	0.558	2.04807e-38	2|3
CA27_paraaortic_lymph_node_1	AL008633.1	8.53162e-43	-0.591614	0.106	0.342	2.76459e-38	2|3
CA27_paraaortic_lymph_node_1	AC027117.2	9.52849e-43	-0.600794	0.211	0.478	3.08761e-38	2|3
CA27_paraaortic_lymph_node_1	FBXO38	1.18929e-42	-0.393881	0.279	0.566	3.85377e-38	2|3
CA27_paraaortic_lymph_node_1	AC011447.3	1.55741e-42	-0.334479	0.011	0.152	5.04662e-38	2|3
CA27_paraaortic_lymph_node_1	CFAP69	2.45567e-42	0.647304	0.634	0.445	7.95734e-38	2|3
CA27_paraaortic_lymph_node_1	ATP6V0E1	8.84423e-42	-0.31699	0.078	0.292	2.86589e-37	2|3
CA27_paraaortic_lymph_node_1	MLLT3	1.15985e-41	-0.471673	0.261	0.542	3.75836e-37	2|3
CA27_paraaortic_lymph_node_1	PGC	1.497e-41	-0.311646	0.019	0.172	4.85088e-37	2|3
CA27_paraaortic_lymph_node_1	SLC38A11	2.3596e-41	-0.829128	0.389	0.637	7.64605e-37	2|3
CA27_paraaortic_lymph_node_1	KIF13B	3.17591e-41	-0.48764	0.377	0.659	1.02912e-36	2|3
CA27_paraaortic_lymph_node_1	OSMR-AS1	3.18653e-41	-0.503249	0.151	0.4	1.03256e-36	2|3
CA27_paraaortic_lymph_node_1	AUTS2	3.57814e-41	0.59427	0.767	0.586	1.15946e-36	2|3
[truncated: 48,131 more rows]

## Sheet: S8
Supplementary Table S8: ATAClone bined regions with differential CN estimate between subclones within samples.
[truncated: 12,015 more rows]
